# Supplementary material for: The Fusarium graminearum Histone Acetyltransferases Are Important for Morphogenesis, DON Biosynthesis, and Pathogenicity
Source: Front Microbiol. 2018 Apr 26;9:654. doi: 10.3389/fmicb.2018.00654 (PMC5932188; doi:10.3389/fmicb.2018.00654)
Supplement: Table S4 — Go enrichment of all DEGs. [file Table_4.XLSX]

## Sheet: ΔFgSAS3 Biological Process
Table S4 Go enrichment of DEGs of ΔFgSAS3 and ΔFgSAS3 mutants
ΔFgSAS3 Biological Process
GO_Name	GO_ID	GO_Level	P_value	EnrichmentScore	HitsGenesCountsInSelectedSet	HitsGenesCountsInBackground	AllGenesCountsInSelectedSet	AllGenesCountsInBackground	GenesOfSelectedSetInGOterm	corrected p-value(BH method)
preribosome	GO:0030684	5	7.77e-16	3.16713	84	107	1311	5289	FGRRES_00695,FGRRES_06243,FGRRES_06340,FGRRES_17310,FGRRES_06203,FGRRES_05687,FGRRES_08439,FGRRES_06113,FGRRES_08381,FGRRES_06165,FGRRES_07952_M,FGRRES_01386,FGRRES_01332,FGRRES_00732,FGRRES_00892,FGRRES_05502,FGRRES_04424,FGRRES_04404,FGRRES_01185,FGRRES_04350,FGRRES_07107,FGRRES_04326,FGRRES_05465,FGRRES_05466,FGRRES_06070,FGRRES_09929,FGRRES_07055,FGRRES_06628,FGRRES_06705,FGRRES_01135,FGRRES_…	1.63e-13
nucleolus	GO:0005730	5	6.66e-16	2.13134	140	265	1311	5289	FGRRES_00695,FGRRES_06372,FGRRES_06340,FGRRES_17310,FGRRES_06203,FGRRES_01490,FGRRES_05698,FGRRES_04166,FGRRES_05687,FGRRES_08439,FGRRES_05858,FGRRES_08381,FGRRES_06165,FGRRES_06161,FGRRES_07952_M,FGRRES_16637,FGRRES_11782,FGRRES_01386,FGRRES_01332,FGRRES_04273,FGRRES_01345,FGRRES_04291,FGRRES_04286,FGRRES_00732,FGRRES_06049,FGRRES_00892,FGRRES_00877,FGRRES_05502,FGRRES_16998,FGRRES_04424,FGRRES_…	2.1e-13
90S preribosome	GO:0030686	6	5.55e-16	3.41366	44	52	1311	5289	FGRRES_00695,FGRRES_06340,FGRRES_17310,FGRRES_06203,FGRRES_08439,FGRRES_08381,FGRRES_01332,FGRRES_00732,FGRRES_00892,FGRRES_05502,FGRRES_04404,FGRRES_06070,FGRRES_09929,FGRRES_07055,FGRRES_00292,FGRRES_16299,FGRRES_07262_M,FGRRES_00270,FGRRES_07399,FGRRES_06788,FGRRES_05229,FGRRES_13661,FGRRES_07379,FGRRES_08856,FGRRES_06821,FGRRES_10262,FGRRES_09761,FGRRES_01870,FGRRES_00372,FGRRES_07296,FGRRES_…	3.5e-13
small-subunit processome	GO:0032040	6	2.53e-14	3.26588	34	42	1311	5289	FGRRES_06340,FGRRES_17310,FGRRES_06203,FGRRES_05687,FGRRES_08439,FGRRES_08381,FGRRES_00892,FGRRES_04424,FGRRES_04404,FGRRES_06070,FGRRES_09929,FGRRES_07055,FGRRES_05556,FGRRES_07262_M,FGRRES_00270,FGRRES_06788,FGRRES_02561,FGRRES_06802,FGRRES_07379,FGRRES_01870,FGRRES_00372,FGRRES_10219,FGRRES_10908,FGRRES_17707_M,FGRRES_00485,FGRRES_00486,FGRRES_10940,FGRRES_00436,FGRRES_05081,FGRRES_10001,FGRRE…	3.19e-12
preribosome, large subunit precursor	GO:0030687	6	2.13e-14	3.32832	33	40	1311	5289	FGRRES_00695,FGRRES_06243,FGRRES_06113,FGRRES_06165,FGRRES_07952_M,FGRRES_01386,FGRRES_01332,FGRRES_01185,FGRRES_04350,FGRRES_07107,FGRRES_04326,FGRRES_05465,FGRRES_05466,FGRRES_06628,FGRRES_06705,FGRRES_01135,FGRRES_00961,FGRRES_00292,FGRRES_06791,FGRRES_13661,FGRRES_07363,FGRRES_06821,FGRRES_09766,FGRRES_16119,FGRRES_06962,FGRRES_11603,FGRRES_02637,FGRRES_06724_M,FGRRES_04979,FGRRES_05124,FGRRE…	3.36e-12
nucleolar part	GO:0044452	5	5.45e-14	2.84387	43	61	1311	5289	FGRRES_00695,FGRRES_06372,FGRRES_06340,FGRRES_17310,FGRRES_01490,FGRRES_04273,FGRRES_04291,FGRRES_00892,FGRRES_16998,FGRRES_04424,FGRRES_06070,FGRRES_09929,FGRRES_06683,FGRRES_07055,FGRRES_07086,FGRRES_04470,FGRRES_05550,FGRRES_05585,FGRRES_16299,FGRRES_07262_M,FGRRES_00270,FGRRES_06788,FGRRES_10304,FGRRES_06802,FGRRES_07379,FGRRES_06821,FGRRES_10262,FGRRES_01870,FGRRES_00365,FGRRES_10219,FGRRES_…	5.72e-12
nuclear lumen	GO:0031981	5	5.36e-06	1.29427	205	639	1311	5289	FGRRES_00695,FGRRES_06372,FGRRES_06340,FGRRES_06260,FGRRES_17310,FGRRES_06203,FGRRES_11865,FGRRES_01490,FGRRES_01457,FGRRES_02026,FGRRES_05698,FGRRES_04166,FGRRES_02022,FGRRES_05687,FGRRES_10795,FGRRES_08439,FGRRES_05853,FGRRES_05858,FGRRES_05857,FGRRES_00799,FGRRES_00794,FGRRES_06137,FGRRES_08381,FGRRES_06165,FGRRES_06161,FGRRES_13318_M,FGRRES_07952_M,FGRRES_16637,FGRRES_05453_M,FGRRES_04308,FGR…	0.000482
plasma membrane	GO:0005886	3	1.49e-05	1.65436	57	139	1311	5289	FGRRES_10787,FGRRES_11029,FGRRES_04104,FGRRES_02022,FGRRES_07946,FGRRES_06139,FGRRES_05839,FGRRES_17206,FGRRES_06392_M,FGRRES_04204,FGRRES_01364,FGRRES_03477,FGRRES_06509,FGRRES_11250,FGRRES_16980_M,FGRRES_04370,FGRRES_00849,FGRRES_09928,FGRRES_16803,FGRRES_09830_M,FGRRES_09988,FGRRES_03248,FGRRES_01410_M,FGRRES_07024,FGRRES_05535,FGRRES_15762,FGRRES_06815_M,FGRRES_02143,FGRRES_10361,FGRRES_16950…	0.00117443
Pwp2p-containing subcomplex of 90S preribosome	GO:0034388	4	5.68e-05	4.03432	7	7	1311	5289	FGRRES_06070,FGRRES_07055,FGRRES_06788,FGRRES_07379,FGRRES_00485,FGRRES_00486,FGRRES_05081,	0.00397611
integral component of membrane	GO:0016021	4	6.78e-05	1.17009	355	1224	1311	5289	FGRRES_13127,FGRRES_06364,FGRRES_09210,FGRRES_06375,FGRRES_06370,FGRRES_00688,FGRRES_05723,FGRRES_06215,FGRRES_06222,FGRRES_09261,FGRRES_00663,FGRRES_02118,FGRRES_05707,FGRRES_06298,FGRRES_09281,FGRRES_00646,FGRRES_10747,FGRRES_08163_M,FGRRES_03693,FGRRES_16719,FGRRES_11029,FGRRES_16726,FGRRES_09297,FGRRES_11812,FGRRES_03680,FGRRES_16115_M,FGRRES_11847,FGRRES_08623_M,FGRRES_16739,FGRRES_16733,FGR…	0.00427092
intrinsic component of membrane	GO:0031224	3	8.68e-05	1.16671	356	1231	1311	5289	FGRRES_13127,FGRRES_06364,FGRRES_09210,FGRRES_06375,FGRRES_06370,FGRRES_00688,FGRRES_05723,FGRRES_06215,FGRRES_06222,FGRRES_09261,FGRRES_00663,FGRRES_02118,FGRRES_05707,FGRRES_06298,FGRRES_09281,FGRRES_00646,FGRRES_10747,FGRRES_08163_M,FGRRES_03693,FGRRES_16719,FGRRES_11029,FGRRES_16726,FGRRES_09297,FGRRES_11812,FGRRES_03680,FGRRES_16115_M,FGRRES_11847,FGRRES_08623_M,FGRRES_16739,FGRRES_16733,FGR…	0.0049694
Noc complex	GO:0030689	4	0.00093	4.03432	5	5	1311	5289	FGRRES_01332,FGRRES_05465,FGRRES_00292,FGRRES_00372,FGRRES_13033_M,	0.0488438
box C/D snoRNP complex	GO:0031428	6	0.00093	4.03432	5	5	1311	5289	FGRRES_06802,FGRRES_01870,FGRRES_10908,FGRRES_10940,FGRRES_10001,	0.0488438
t-UTP complex	GO:0034455	4	0.00093	4.03432	5	5	1311	5289	FGRRES_17310,FGRRES_00892,FGRRES_04424,FGRRES_07262_M,FGRRES_00270,	0.0488438
DNA-directed RNA polymerase I complex	GO:0005736	6	0.00259336	2.68955	8	12	1311	5289	FGRRES_04273,FGRRES_04291,FGRRES_06683,FGRRES_04470,FGRRES_05550,FGRRES_00365,FGRRES_06937,FGRRES_16512,	0.0907677
intracellular organelle lumen	GO:0070013	4	0.00235126	1.16252	236	819	1311	5289	FGRRES_00695,FGRRES_06372,FGRRES_06340,FGRRES_05733,FGRRES_00654,FGRRES_06282,FGRRES_06260,FGRRES_17310,FGRRES_06203,FGRRES_11865,FGRRES_01490,FGRRES_01457,FGRRES_02026,FGRRES_05698,FGRRES_04166,FGRRES_05696,FGRRES_02022,FGRRES_05687,FGRRES_10795,FGRRES_08439,FGRRES_05853,FGRRES_05858,FGRRES_05857,FGRRES_00799,FGRRES_00794,FGRRES_06137,FGRRES_08381,FGRRES_08386,FGRRES_06165,FGRRES_06161,FGRRES_13…	0.0987528
organelle lumen	GO:0043233	3	0.00235126	1.16252	236	819	1311	5289	FGRRES_00695,FGRRES_06372,FGRRES_06340,FGRRES_05733,FGRRES_00654,FGRRES_06282,FGRRES_06260,FGRRES_17310,FGRRES_06203,FGRRES_11865,FGRRES_01490,FGRRES_01457,FGRRES_02026,FGRRES_05698,FGRRES_04166,FGRRES_05696,FGRRES_02022,FGRRES_05687,FGRRES_10795,FGRRES_08439,FGRRES_05853,FGRRES_05858,FGRRES_05857,FGRRES_00799,FGRRES_00794,FGRRES_06137,FGRRES_08381,FGRRES_08386,FGRRES_06165,FGRRES_06161,FGRRES_13…	0.0987528
membrane-enclosed lumen	GO:0031974	2	0.00235126	1.16252	236	819	1311	5289	FGRRES_00695,FGRRES_06372,FGRRES_06340,FGRRES_05733,FGRRES_00654,FGRRES_06282,FGRRES_06260,FGRRES_17310,FGRRES_06203,FGRRES_11865,FGRRES_01490,FGRRES_01457,FGRRES_02026,FGRRES_05698,FGRRES_04166,FGRRES_05696,FGRRES_02022,FGRRES_05687,FGRRES_10795,FGRRES_08439,FGRRES_05853,FGRRES_05858,FGRRES_05857,FGRRES_00799,FGRRES_00794,FGRRES_06137,FGRRES_08381,FGRRES_08386,FGRRES_06165,FGRRES_06161,FGRRES_13…	0.0987528
extrinsic component of plasma membrane	GO:0019897	4	0.00400657	3.02574	6	8	1311	5289	FGRRES_04104,FGRRES_06392_M,FGRRES_05535,FGRRES_10272,FGRRES_07235,FGRRES_07473,	0.132849
small nucleolar ribonucleoprotein complex	GO:0005732	5	0.00422989	2.10487	12	23	1311	5289	FGRRES_06372,FGRRES_01490,FGRRES_16998,FGRRES_10304,FGRRES_06802,FGRRES_01870,FGRRES_07206,FGRRES_10908,FGRRES_10940,FGRRES_09036_M,FGRRES_10001,FGRRES_10033,	0.133242
cell periphery	GO:0071944	3	0.00739302	1.26164	86	275	1311	5289	FGRRES_06374,FGRRES_10787,FGRRES_08485,FGRRES_09289,FGRRES_11029,FGRRES_16765,FGRRES_16733,FGRRES_04104,FGRRES_01497,FGRRES_02022,FGRRES_02092,FGRRES_07946,FGRRES_06139,FGRRES_05839,FGRRES_17206,FGRRES_06392_M,FGRRES_04204,FGRRES_01364,FGRRES_03477,FGRRES_01316,FGRRES_07433_M,FGRRES_01188,FGRRES_06572,FGRRES_06509,FGRRES_11250,FGRRES_16980_M,FGRRES_04370,FGRRES_01923,FGRRES_00849,FGRRES_09928,FGR…	0.202504
plasma membrane part	GO:0044459	3	0.00732146	1.68097	20	48	1311	5289	FGRRES_11029,FGRRES_04104,FGRRES_07946,FGRRES_17206,FGRRES_06392_M,FGRRES_01364,FGRRES_04370,FGRRES_09928,FGRRES_16803,FGRRES_01410_M,FGRRES_05535,FGRRES_02143,FGRRES_03347_M,FGRRES_10272,FGRRES_09782,FGRRES_07235,FGRRES_10042,FGRRES_02698,FGRRES_05160,FGRRES_07473,	0.20966
preribosome, small subunit precursor	GO:0030688	6	0.00713212	2.5673	7	11	1311	5289	FGRRES_07262_M,FGRRES_05229,FGRRES_13661,FGRRES_00372,FGRRES_09037_M,FGRRES_00567,FGRRES_13033_M,	0.213964
nuclear part	GO:0044428	4	0.00843463	1.1322	245	873	1311	5289	FGRRES_10757,FGRRES_06364,FGRRES_00695,FGRRES_06372,FGRRES_06340,FGRRES_00660,FGRRES_10728,FGRRES_06260,FGRRES_17310,FGRRES_06203,FGRRES_16766,FGRRES_11865,FGRRES_01490,FGRRES_01457,FGRRES_02026,FGRRES_05698,FGRRES_04166,FGRRES_02022,FGRRES_05687,FGRRES_05671,FGRRES_10795,FGRRES_08439,FGRRES_05853,FGRRES_05858,FGRRES_05857,FGRRES_00799,FGRRES_00794,FGRRES_09339,FGRRES_06137,FGRRES_08381,FGRRES_06…	0.221409
PeBoW complex	GO:0070545	4	0.0152034	4.03432	3	3	1311	5289	FGRRES_00695,FGRRES_06821,FGRRES_11603,	0.308971
carbamoyl-phosphate synthase complex	GO:0005951	5	0.0152034	4.03432	3	3	1311	5289	FGRRES_01217,FGRRES_09638,FGRRES_09554,	0.308971
Mpp10 complex	GO:0034457	4	0.0152034	4.03432	3	3	1311	5289	FGRRES_09929,FGRRES_10219,FGRRES_10033,	0.308971
membrane microdomain	GO:0098857	4	0.0123414	2.88166	5	7	1311	5289	FGRRES_02022,FGRRES_02092,FGRRES_09928,FGRRES_01410_M,FGRRES_04095,	0.311002
membrane raft	GO:0045121	5	0.0123414	2.88166	5	7	1311	5289	FGRRES_02022,FGRRES_02092,FGRRES_09928,FGRRES_01410_M,FGRRES_04095,	0.311002
membrane	GO:0016020	2	0.0182469	1.06892	496	1872	1311	5289	FGRRES_13127,FGRRES_06364,FGRRES_09210,FGRRES_13137,FGRRES_06375,FGRRES_06370,FGRRES_00688,FGRRES_05723,FGRRES_10787,FGRRES_06215,FGRRES_06222,FGRRES_09261,FGRRES_00663,FGRRES_02118,FGRRES_05707,FGRRES_06298,FGRRES_09281,FGRRES_00646,FGRRES_06277,FGRRES_10747,FGRRES_07832,FGRRES_08163_M,FGRRES_03693,FGRRES_16719,FGRRES_11029,FGRRES_16726,FGRRES_16723,FGRRES_09297,FGRRES_11812,FGRRES_03680,FGRRES_…	0.338105
box H/ACA RNP complex	GO:0072588	6	0.0150886	3.22746	4	5	1311	5289	FGRRES_06372,FGRRES_10304,FGRRES_07206,FGRRES_09036_M,	0.352068
palmitoyltransferase complex	GO:0002178	5	0.0150886	3.22746	4	5	1311	5289	FGRRES_00688,FGRRES_04102,FGRRES_10152,FGRRES_08531,	0.352068
box H/ACA snoRNP complex	GO:0031429	6	0.0150886	3.22746	4	5	1311	5289	FGRRES_06372,FGRRES_10304,FGRRES_07206,FGRRES_09036_M,	0.352068
endoplasmic reticulum palmitoyltransferase complex	GO:0031211	6	0.0150886	3.22746	4	5	1311	5289	FGRRES_00688,FGRRES_04102,FGRRES_10152,FGRRES_08531,	0.352068
membrane part	GO:0044425	2	0.0628035	1.06023	390	1484	1311	5289	FGRRES_13127,FGRRES_06364,FGRRES_09210,FGRRES_13137,FGRRES_06375,FGRRES_06370,FGRRES_00688,FGRRES_05723,FGRRES_06215,FGRRES_06222,FGRRES_09261,FGRRES_00663,FGRRES_02118,FGRRES_05707,FGRRES_06298,FGRRES_09281,FGRRES_00646,FGRRES_06277,FGRRES_10747,FGRRES_08163_M,FGRRES_03693,FGRRES_16719,FGRRES_11029,FGRRES_16726,FGRRES_09297,FGRRES_11812,FGRRES_03680,FGRRES_16115_M,FGRRES_11847,FGRRES_08623_M,FGR…	0.638165
viral nucleocapsid	GO:0019013	3	0.0381228	1.53689	16	42	1311	5289	FGRRES_06372,FGRRES_17310,FGRRES_01299,FGRRES_04286,FGRRES_00892,FGRRES_04404,FGRRES_09929,FGRRES_06788,FGRRES_05244,FGRRES_13623,FGRRES_10304,FGRRES_08856,FGRRES_10219,FGRRES_10940,FGRRES_09036_M,FGRRES_10001,	0.649118
extrinsic component of cytoplasmic side of plasma membrane	GO:0031234	5	0.036401	2.68955	4	6	1311	5289	FGRRES_04104,FGRRES_05535,FGRRES_10272,FGRRES_07235,	0.655218
perinuclear region of cytoplasm	GO:0048471	5	0.036401	2.68955	4	6	1311	5289	FGRRES_06375,FGRRES_05737_M,FGRRES_05974,FGRRES_08531,	0.655218
Golgi cis cisterna	GO:0000137	7	0.0673789	1.61373	10	25	1311	5289	FGRRES_16739,FGRRES_17207,FGRRES_04278,FGRRES_04412,FGRRES_06391_M,FGRRES_17252_M,FGRRES_06856,FGRRES_02714,FGRRES_10091,FGRRES_13014,	0.673789
plasma membrane region	GO:0098590	3	0.0684806	2.30533	4	7	1311	5289	FGRRES_09928,FGRRES_01410_M,FGRRES_03347_M,FGRRES_09782,	0.674106
Golgi cisterna	GO:0031985	6	0.0755331	1.51287	12	32	1311	5289	FGRRES_00688,FGRRES_16739,FGRRES_17207,FGRRES_04278,FGRRES_04412,FGRRES_06391_M,FGRRES_17252_M,FGRRES_06856,FGRRES_08873_M,FGRRES_02714,FGRRES_10091,FGRRES_13014,	0.720997
intracellular ribonucleoprotein complex	GO:0030529	4	0.0435836	1.12303	157	564	1311	5289	FGRRES_10757,FGRRES_10755,FGRRES_00695,FGRRES_06372,FGRRES_06243,FGRRES_06340,FGRRES_06353,FGRRES_16717,FGRRES_17310,FGRRES_06203,FGRRES_16766,FGRRES_16673,FGRRES_01490,FGRRES_04181,FGRRES_02025,FGRRES_05687,FGRRES_20078,FGRRES_08439,FGRRES_06113,FGRRES_05853,FGRRES_05858,FGRRES_05857,FGRRES_08381,FGRRES_06165,FGRRES_05737_M,FGRRES_08421_M,FGRRES_07952_M,FGRRES_01299,FGRRES_04308,FGRRES_15928,FGR…	0.72257
ribonucleoprotein complex	GO:1990904	3	0.0435836	1.12303	157	564	1311	5289	FGRRES_10757,FGRRES_10755,FGRRES_00695,FGRRES_06372,FGRRES_06243,FGRRES_06340,FGRRES_06353,FGRRES_16717,FGRRES_17310,FGRRES_06203,FGRRES_16766,FGRRES_16673,FGRRES_01490,FGRRES_04181,FGRRES_02025,FGRRES_05687,FGRRES_20078,FGRRES_08439,FGRRES_06113,FGRRES_05853,FGRRES_05858,FGRRES_05857,FGRRES_08381,FGRRES_06165,FGRRES_05737_M,FGRRES_08421_M,FGRRES_07952_M,FGRRES_01299,FGRRES_04308,FGRRES_15928,FGR…	0.72257
rDNA heterochromatin	GO:0033553	7	0.0754756	2.01716	5	10	1311	5289	FGRRES_17310,FGRRES_00892,FGRRES_04424,FGRRES_07262_M,FGRRES_00460,	0.731532
protein histidine kinase complex	GO:0009365	7	0.0531176	1.729	9	21	1311	5289	FGRRES_10606,FGRRES_16586,FGRRES_17112,FGRRES_07623,FGRRES_17004,FGRRES_16113,FGRRES_05990,FGRRES_10042,FGRRES_08540,	0.743646
cytoplasmic side of plasma membrane	GO:0009898	4	0.0521768	2.01716	6	12	1311	5289	FGRRES_04104,FGRRES_17206,FGRRES_05535,FGRRES_10272,FGRRES_07235,FGRRES_02698,	0.747076
protein kinase complex	GO:1902911	6	0.0832256	1.40324	16	46	1311	5289	FGRRES_01438,FGRRES_10606,FGRRES_04308,FGRRES_16586,FGRRES_17112,FGRRES_07623,FGRRES_17004,FGRRES_16828,FGRRES_09978,FGRRES_16113,FGRRES_05990,FGRRES_05630_M,FGRRES_10042,FGRRES_07423,FGRRES_08540,FGRRES_04910,	0.77106
GTPase complex	GO:1905360	4	0.0495274	3.02574	3	4	1311	5289	FGRRES_04104,FGRRES_05535,FGRRES_07235,	0.780056
serine C-palmitoyltransferase complex	GO:0017059	7	0.0495274	3.02574	3	4	1311	5289	FGRRES_00688,FGRRES_04102,FGRRES_10152,	0.780056
heterotrimeric G-protein complex	GO:0005834	4	0.0495274	3.02574	3	4	1311	5289	FGRRES_04104,FGRRES_05535,FGRRES_07235,	0.780056
SPOTS complex	GO:0035339	8	0.0495274	3.02574	3	4	1311	5289	FGRRES_00688,FGRRES_04102,FGRRES_10152,	0.780056
cell tip	GO:0051286	3	0.083012	1.26327	31	99	1311	5289	FGRRES_06374,FGRRES_06272,FGRRES_06206,FGRRES_16765,FGRRES_00627,FGRRES_02092,FGRRES_16633,FGRRES_16567,FGRRES_01316,FGRRES_07433_M,FGRRES_01188,FGRRES_01243,FGRRES_09928,FGRRES_04068_M,FGRRES_09982,FGRRES_01410_M,FGRRES_16782,FGRRES_10361,FGRRES_05261,FGRRES_03347_M,FGRRES_16146,FGRRES_09782,FGRRES_00343,FGRRES_06992,FGRRES_16481,FGRRES_08667,FGRRES_05990,FGRRES_10016,FGRRES_04042,FGRRES_08537,F…	0.780561
TRAMP complex	GO:0031499	4	0.0614057	4.03432	2	2	1311	5289	FGRRES_08158,FGRRES_01656,	0.789502
cellular bud membrane	GO:0033101	4	0.0614057	4.03432	2	2	1311	5289	FGRRES_11029,FGRRES_04370,	0.789502
CBF3 complex	GO:0031518	4	0.0614057	4.03432	2	2	1311	5289	FGRRES_16767,FGRRES_06922,	0.789502
Noc4p-Nop14p complex	GO:0030692	5	0.0614057	4.03432	2	2	1311	5289	FGRRES_00372,FGRRES_13033_M,	0.789502
Noc1p-Noc2p complex	GO:0030690	5	0.0614057	4.03432	2	2	1311	5289	FGRRES_01332,FGRRES_00292,	0.789502
Noc2p-Noc3p complex	GO:0030691	5	0.0614057	4.03432	2	2	1311	5289	FGRRES_05465,FGRRES_00292,	0.789502
plasma membrane raft	GO:0044853	6	0.0614057	4.03432	2	2	1311	5289	FGRRES_09928,FGRRES_01410_M,	0.789502
mitochondrial isocitrate dehydrogenase complex (NAD+)	GO:0005962	6	0.0614057	4.03432	2	2	1311	5289	FGRRES_05733,FGRRES_09580,	0.789502
high-affinity iron permease complex	GO:0033573	6	0.0614057	4.03432	2	2	1311	5289	FGRRES_02143,FGRRES_05160,	0.789502
nitrate reductase complex	GO:0009325	4	0.0614057	4.03432	2	2	1311	5289	FGRRES_17337,FGRRES_15910,	0.789502
ferroxidase complex	GO:1905862	4	0.0614057	4.03432	2	2	1311	5289	FGRRES_02143,FGRRES_05160,	0.789502
prospore membrane leading edge	GO:0070056	3	0.0614057	4.03432	2	2	1311	5289	FGRRES_09928,FGRRES_00497,	0.789502
isocitrate dehydrogenase complex (NAD+)	GO:0045242	5	0.0614057	4.03432	2	2	1311	5289	FGRRES_05733,FGRRES_09580,	0.789502
oxidoreductase complex	GO:1990204	3	0.05769	1.46703	16	44	1311	5289	FGRRES_13137,FGRRES_05733,FGRRES_06127_M,FGRRES_17337,FGRRES_09341,FGRRES_04309,FGRRES_15910,FGRRES_04299,FGRRES_08351,FGRRES_01196,FGRRES_01981,FGRRES_05455,FGRRES_02143,FGRRES_05160,FGRRES_05174,FGRRES_09580,	0.790103
virion part	GO:0044423	2	0.0604408	1.42388	18	51	1311	5289	FGRRES_06372,FGRRES_17310,FGRRES_01299,FGRRES_04286,FGRRES_00892,FGRRES_04404,FGRRES_09929,FGRRES_06788,FGRRES_05244,FGRRES_13623,FGRRES_10304,FGRRES_08856,FGRRES_10219,FGRRES_10940,FGRRES_10157,FGRRES_09036_M,FGRRES_10001,FGRRES_10865,	0.810164
virion	GO:0019012	2	0.0604408	1.42388	18	51	1311	5289	FGRRES_06372,FGRRES_17310,FGRRES_01299,FGRRES_04286,FGRRES_00892,FGRRES_04404,FGRRES_09929,FGRRES_06788,FGRRES_05244,FGRRES_13623,FGRRES_10304,FGRRES_08856,FGRRES_10219,FGRRES_10940,FGRRES_10157,FGRRES_09036_M,FGRRES_10001,FGRRES_10865,	0.810164
Golgi stack	GO:0005795	6	0.0929948	1.46703	12	33	1311	5289	FGRRES_00688,FGRRES_16739,FGRRES_17207,FGRRES_04278,FGRRES_04412,FGRRES_06391_M,FGRRES_17252_M,FGRRES_06856,FGRRES_08873_M,FGRRES_02714,FGRRES_10091,FGRRES_13014,	0.849083
viral capsid	GO:0019028	3	0.0983598	1.37339	16	47	1311	5289	FGRRES_06372,FGRRES_17310,FGRRES_01299,FGRRES_04286,FGRRES_00892,FGRRES_04404,FGRRES_09929,FGRRES_06788,FGRRES_05244,FGRRES_13623,FGRRES_10304,FGRRES_08856,FGRRES_10219,FGRRES_10940,FGRRES_09036_M,FGRRES_10001,	0.885238
perinuclear endoplasmic reticulum	GO:0097038	6	0.101186	2.42059	3	5	1311	5289	FGRRES_06375,FGRRES_05974,FGRRES_08531,	0.897843
membrane region	GO:0098589	3	0.107669	1.729	6	14	1311	5289	FGRRES_02022,FGRRES_02092,FGRRES_09928,FGRRES_01410_M,FGRRES_00497,FGRRES_04095,	0.942101
cortical endoplasmic reticulum	GO:0032541	6	0.111012	1.83378	5	11	1311	5289	FGRRES_16733,FGRRES_09796,FGRRES_04983,FGRRES_08531,FGRRES_07419,	0.958051
endoplasmic reticulum tubular network	GO:0071782	6	0.111012	1.83378	5	11	1311	5289	FGRRES_16733,FGRRES_09796,FGRRES_04983,FGRRES_08531,FGRRES_07419,	0.958051
alpha-1,6-mannosyltransferase complex	GO:0000136	5	0.11577	1.51287	9	24	1311	5289	FGRRES_16739,FGRRES_17207,FGRRES_04278,FGRRES_04412,FGRRES_17252_M,FGRRES_06856,FGRRES_02714,FGRRES_10091,FGRRES_13014,	0.97247
nuclear periphery	GO:0034399	5	0.121873	1.43153	11	31	1311	5289	FGRRES_02022,FGRRES_09025,FGRRES_13254_M,FGRRES_07107,FGRRES_05455,FGRRES_02237,FGRRES_02233,FGRRES_09965,FGRRES_06845,FGRRES_01854,FGRRES_07457,	1
mannosyltransferase complex	GO:0031501	4	0.14299	1.45236	9	25	1311	5289	FGRRES_16739,FGRRES_17207,FGRRES_04278,FGRRES_04412,FGRRES_17252_M,FGRRES_06856,FGRRES_02714,FGRRES_10091,FGRRES_13014,	1
cytoplasmic side of membrane	GO:0098562	4	0.143411	1.61373	6	15	1311	5289	FGRRES_04104,FGRRES_17206,FGRRES_05535,FGRRES_10272,FGRRES_07235,FGRRES_02698,	1
side of membrane	GO:0098552	3	0.143411	1.61373	6	15	1311	5289	FGRRES_04104,FGRRES_17206,FGRRES_05535,FGRRES_10272,FGRRES_07235,FGRRES_02698,	1
CURI complex	GO:0032545	4	0.153811	2.68955	2	3	1311	5289	FGRRES_06340,FGRRES_10262,	1
RNAi effector complex	GO:0031332	5	0.153811	2.68955	2	3	1311	5289	FGRRES_00348,FGRRES_08722,	1
Ku70:Ku80 complex	GO:0043564	4	0.153811	2.68955	2	3	1311	5289	FGRRES_12711,FGRRES_06721,	1
Slx1-Slx4 complex	GO:0033557	4	0.153811	2.68955	2	3	1311	5289	FGRRES_05857,FGRRES_00799,	1
mitochondrial tricarboxylic acid cycle enzyme complex	GO:0030062	5	0.16597	2.01716	3	6	1311	5289	FGRRES_05733,FGRRES_04309,FGRRES_09580,	1
UTP-C complex	GO:0034456	4	0.16597	2.01716	3	6	1311	5289	FGRRES_06340,FGRRES_16299,FGRRES_10262,	1
heterochromatin	GO:0000792	6	0.188327	1.34477	10	30	1311	5289	FGRRES_17310,FGRRES_00794,FGRRES_09025,FGRRES_00892,FGRRES_04424,FGRRES_07262_M,FGRRES_00348,FGRRES_06661_M,FGRRES_00460,FGRRES_02659,	1
plasma membrane protein complex	GO:0098797	4	0.200474	1.55166	5	13	1311	5289	FGRRES_04104,FGRRES_05535,FGRRES_02143,FGRRES_07235,FGRRES_05160,	1
integral component of plasma membrane	GO:0005887	5	0.200474	1.55166	5	13	1311	5289	FGRRES_16803,FGRRES_02143,FGRRES_09782,FGRRES_10042,FGRRES_05160,	1
cell division site	GO:0032153	3	0.200735	1.12197	47	169	1311	5289	FGRRES_06369,FGRRES_06374,FGRRES_00660,FGRRES_06272,FGRRES_06206,FGRRES_16765,FGRRES_01497,FGRRES_00627,FGRRES_02092,FGRRES_16633,FGRRES_16567,FGRRES_01316,FGRRES_07433_M,FGRRES_04326,FGRRES_01243,FGRRES_06070,FGRRES_09928,FGRRES_04068_M,FGRRES_09982,FGRRES_01410_M,FGRRES_16782,FGRRES_10361,FGRRES_16950_M,FGRRES_02564,FGRRES_05261,FGRRES_03347_M,FGRRES_07284,FGRRES_09796,FGRRES_00343,FGRRES_02476…	1
sarcoplasm	GO:0016528	5	0.219009	1.61373	4	10	1311	5289	FGRRES_01196,FGRRES_01265,FGRRES_02400,FGRRES_09515,	1
sarcoplasmic reticulum	GO:0016529	6	0.219009	1.61373	4	10	1311	5289	FGRRES_01196,FGRRES_01265,FGRRES_02400,FGRRES_09515,	1
succinate dehydrogenase complex	GO:0045281	4	0.239087	1.729	3	7	1311	5289	FGRRES_13137,FGRRES_09341,FGRRES_01981,	1
Rpd3L complex	GO:0033698	8	0.239087	1.729	3	7	1311	5289	FGRRES_00297,FGRRES_00399,FGRRES_08516,	1
respiratory chain complex II	GO:0045273	4	0.239087	1.729	3	7	1311	5289	FGRRES_13137,FGRRES_09341,FGRRES_01981,	1
nuclear SCF ubiquitin ligase complex	GO:0043224	6	0.239087	1.729	3	7	1311	5289	FGRRES_05455,FGRRES_02237,FGRRES_06922,	1
fatty acid synthase complex	GO:0005835	4	0.239087	1.729	3	7	1311	5289	FGRRES_15680_M,FGRRES_11656,FGRRES_10853,	1
gamma-tubulin complex	GO:0000930	4	0.239087	1.729	3	7	1311	5289	FGRRES_06364,FGRRES_13685,FGRRES_09994_M,	1
Sin3-type complex	GO:0070822	7	0.239087	1.729	3	7	1311	5289	FGRRES_00297,FGRRES_00399,FGRRES_08516,	1
phosphopyruvate hydratase complex	GO:0000015	6	0.247873	4.03432	1	1	1311	5289	FGRRES_01346,	1
elongin complex	GO:0070449	5	0.247873	4.03432	1	1	1311	5289	FGRRES_00303,	1
nucleolar preribosome	GO:0030685	6	0.247873	4.03432	1	1	1311	5289	FGRRES_05585,	1
Tea1 cell-end complex	GO:0031500	5	0.247873	4.03432	1	1	1311	5289	FGRRES_16146,	1
extrinsic component of autophagosome membrane	GO:0097635	6	0.247873	4.03432	1	1	1311	5289	FGRRES_05547,	1
RISC complex	GO:0016442	6	0.247873	4.03432	1	1	1311	5289	FGRRES_08722,	1
DNA ligase IV complex	GO:0032807	4	0.247873	4.03432	1	1	1311	5289	FGRRES_04154_M,	1
DNA polymerase processivity factor complex	GO:0044796	4	0.247873	4.03432	1	1	1311	5289	FGRRES_01052,	1
PCNA complex	GO:0043626	5	0.247873	4.03432	1	1	1311	5289	FGRRES_01052,	1
SREBP-SCAP complex	GO:0032936	5	0.247873	4.03432	1	1	1311	5289	FGRRES_07450,	1
Golgi to plasma membrane transport vesicle	GO:0070319	8	0.247873	4.03432	1	1	1311	5289	FGRRES_04237,	1
dense fibrillar component	GO:0001651	6	0.247873	4.03432	1	1	1311	5289	FGRRES_11878_M,	1
monopolin complex	GO:0033551	4	0.247873	4.03432	1	1	1311	5289	FGRRES_16980_M,	1
formate dehydrogenase complex	GO:0009326	4	0.247873	4.03432	1	1	1311	5289	FGRRES_06127_M,	1
glutamate-cysteine ligase complex	GO:0017109	5	0.247873	4.03432	1	1	1311	5289	FGRRES_09991,	1
aspartate carbamoyltransferase complex	GO:0009347	3	0.247873	4.03432	1	1	1311	5289	FGRRES_09638,	1
prospore membrane spindle pole body attachment site	GO:0070057	3	0.247873	4.03432	1	1	1311	5289	FGRRES_00497,	1
chromosome passenger complex	GO:0032133	5	0.247873	4.03432	1	1	1311	5289	FGRRES_06959,	1
imidazoleglycerol-phosphate synthase complex	GO:0009382	5	0.247873	4.03432	1	1	1311	5289	FGRRES_09984,	1
glyoxysome	GO:0009514	7	0.247873	4.03432	1	1	1311	5289	FGRRES_09896,	1
primary cell septum	GO:0000936	4	0.247873	4.03432	1	1	1311	5289	FGRRES_02022,	1
RITS complex	GO:0030958	6	0.247873	4.03432	1	1	1311	5289	FGRRES_00348,	1
gamma DNA polymerase complex	GO:0005760	5	0.247873	4.03432	1	1	1311	5289	FGRRES_05516,	1
intrinsic component of plasma membrane	GO:0031226	4	0.252033	1.44083	5	14	1311	5289	FGRRES_16803,FGRRES_02143,FGRRES_09782,FGRRES_10042,FGRRES_05160,	1
viral membrane	GO:0036338	3	0.258094	2.01716	2	4	1311	5289	FGRRES_10157,FGRRES_10865,	1
ribonuclease P complex	GO:0030677	5	0.258094	2.01716	2	4	1311	5289	FGRRES_01490,FGRRES_16998,	1
multimeric ribonuclease P complex	GO:0030681	6	0.258094	2.01716	2	4	1311	5289	FGRRES_01490,FGRRES_16998,	1
nuclear matrix	GO:0016363	5	0.258094	2.01716	2	4	1311	5289	FGRRES_05455,FGRRES_02237,	1
ribonuclease MRP complex	GO:0000172	6	0.258094	2.01716	2	4	1311	5289	FGRRES_01490,FGRRES_16998,	1
mitochondrial inner membrane protein insertion complex	GO:0042721	5	0.258094	2.01716	2	4	1311	5289	FGRRES_01189,FGRRES_05543_M,	1
nuclear pore nuclear basket	GO:0044615	4	0.258094	2.01716	2	4	1311	5289	FGRRES_06845,FGRRES_09994_M,	1
viral envelope	GO:0019031	4	0.258094	2.01716	2	4	1311	5289	FGRRES_10157,FGRRES_10865,	1
1-alkyl-2-acetylglycerophosphocholine esterase complex	GO:0008247	4	0.258094	2.01716	2	4	1311	5289	FGRRES_00194,FGRRES_05937,	1
new mitotic spindle pole body	GO:0071958	8	0.258094	2.01716	2	4	1311	5289	FGRRES_06364,FGRRES_09408,	1
nucleolar ribonuclease P complex	GO:0005655	7	0.258094	2.01716	2	4	1311	5289	FGRRES_01490,FGRRES_16998,	1
horsetail nucleus	GO:0071686	6	0.258094	2.01716	2	4	1311	5289	FGRRES_06364,FGRRES_17271,	1
intracellular non-membrane-bounded organelle	GO:0043232	4	0.262549	1.0308	290	1135	1311	5289	FGRRES_10755,FGRRES_06364,FGRRES_00695,FGRRES_06375,FGRRES_06374,FGRRES_06372,FGRRES_06340,FGRRES_05733,FGRRES_06215,FGRRES_06353,FGRRES_08485,FGRRES_00660,FGRRES_06282,FGRRES_06272,FGRRES_06260,FGRRES_16717,FGRRES_17310,FGRRES_06203,FGRRES_16765,FGRRES_16767,FGRRES_01497,FGRRES_01490,FGRRES_01457,FGRRES_02054,FGRRES_04181,FGRRES_00627,FGRRES_02025,FGRRES_02026,FGRRES_05698,FGRRES_04166,FGRRES_08…	1
non-membrane-bounded organelle	GO:0043228	3	0.268892	1.02989	290	1136	1311	5289	FGRRES_10755,FGRRES_06364,FGRRES_00695,FGRRES_06375,FGRRES_06374,FGRRES_06372,FGRRES_06340,FGRRES_05733,FGRRES_06215,FGRRES_06353,FGRRES_08485,FGRRES_00660,FGRRES_06282,FGRRES_06272,FGRRES_06260,FGRRES_16717,FGRRES_17310,FGRRES_06203,FGRRES_16765,FGRRES_16767,FGRRES_01497,FGRRES_01490,FGRRES_01457,FGRRES_02054,FGRRES_04181,FGRRES_00627,FGRRES_02025,FGRRES_02026,FGRRES_05698,FGRRES_04166,FGRRES_08…	1
integral component of Golgi membrane	GO:0030173	6	0.273506	1.2103	12	40	1311	5289	FGRRES_00688,FGRRES_16726,FGRRES_16739,FGRRES_17207,FGRRES_04278,FGRRES_04412,FGRRES_17252_M,FGRRES_06856,FGRRES_02714,FGRRES_05082,FGRRES_10091,FGRRES_13014,	1
intrinsic component of Golgi membrane	GO:0031228	5	0.273506	1.2103	12	40	1311	5289	FGRRES_00688,FGRRES_16726,FGRRES_16739,FGRRES_17207,FGRRES_04278,FGRRES_04412,FGRRES_17252_M,FGRRES_06856,FGRRES_02714,FGRRES_05082,FGRRES_10091,FGRRES_13014,	1
serine/threonine protein kinase complex	GO:1902554	7	0.292091	1.28365	7	22	1311	5289	FGRRES_01438,FGRRES_04308,FGRRES_16828,FGRRES_09978,FGRRES_05630_M,FGRRES_07423,FGRRES_04910,	1
Prp19 complex	GO:0000974	4	0.306344	1.34477	5	15	1311	5289	FGRRES_01300,FGRRES_09807,FGRRES_17193,FGRRES_12577_M,FGRRES_05138,	1
transcriptional repressor complex	GO:0017053	3	0.316102	1.51287	3	8	1311	5289	FGRRES_00892,FGRRES_16007,FGRRES_05498,	1
ascospore-type prospore	GO:0042764	4	0.324043	1.274	6	19	1311	5289	FGRRES_09831_M,FGRRES_09928,FGRRES_01410_M,FGRRES_05315,FGRRES_00497,FGRRES_05890,	1
intracellular immature spore	GO:0042763	3	0.324043	1.274	6	19	1311	5289	FGRRES_09831_M,FGRRES_09928,FGRRES_01410_M,FGRRES_05315,FGRRES_00497,FGRRES_05890,	1
mitotic spindle	GO:0072686	6	0.332489	1.16783	11	38	1311	5289	FGRRES_17310,FGRRES_07947,FGRRES_07962,FGRRES_06165,FGRRES_00270,FGRRES_01035,FGRRES_01870,FGRRES_09795,FGRRES_06631_M,FGRRES_02797,FGRRES_04929,	1
cell cortex of cell tip	GO:0051285	8	0.337151	1.22784	7	23	1311	5289	FGRRES_02092,FGRRES_07433_M,FGRRES_01188,FGRRES_16146,FGRRES_06992,FGRRES_10016,FGRRES_08537,	1
cyclin-dependent protein kinase holoenzyme complex	GO:0000307	4	0.344563	1.34477	4	12	1311	5289	FGRRES_01438,FGRRES_16828,FGRRES_05630_M,FGRRES_04910,	1
cell wall	GO:0005618	4	0.347325	1.19536	8	27	1311	5289	FGRRES_09289,FGRRES_02022,FGRRES_17206,FGRRES_06572,FGRRES_03309,FGRRES_03017,FGRRES_05315,FGRRES_15729_M,	1
DNA polymerase complex	GO:0042575	4	0.347325	1.19536	8	27	1311	5289	FGRRES_00621,FGRRES_11782,FGRRES_06032,FGRRES_05516,FGRRES_15847,FGRRES_08158,FGRRES_01052,FGRRES_01035,	1
external encapsulating structure	GO:0030312	3	0.347325	1.19536	8	27	1311	5289	FGRRES_09289,FGRRES_02022,FGRRES_17206,FGRRES_06572,FGRRES_03309,FGRRES_03017,FGRRES_05315,FGRRES_15729_M,	1
kinesin complex	GO:0005871	5	0.362065	1.26073	5	16	1311	5289	FGRRES_02054,FGRRES_06149,FGRRES_16784,FGRRES_16336,FGRRES_01690,	1
chromosome, telomeric region	GO:0000781	6	0.362215	1.15266	10	35	1311	5289	FGRRES_01457,FGRRES_00794,FGRRES_12711,FGRRES_06721,FGRRES_01157,FGRRES_01699_M,FGRRES_00460,FGRRES_02622,FGRRES_09556,FGRRES_07406,	1
plasma membrane of cell tip	GO:0031520	4	0.362699	1.61373	2	5	1311	5289	FGRRES_03347_M,FGRRES_09782,	1
ascospore wall	GO:0005619	6	0.362699	1.61373	2	5	1311	5289	FGRRES_05315,FGRRES_15729_M,	1
Rpd3L-Expanded complex	GO:0070210	7	0.362699	1.61373	2	5	1311	5289	FGRRES_00399,FGRRES_08516,	1
cellular bud neck septin structure	GO:0000399	4	0.362699	1.61373	2	5	1311	5289	FGRRES_05315,FGRRES_07218,	1
nuclear pore outer ring	GO:0031080	4	0.362699	1.61373	2	5	1311	5289	FGRRES_01323,FGRRES_09965,	1
cleavage apparatus septin structure	GO:0032161	4	0.362699	1.61373	2	5	1311	5289	FGRRES_05315,FGRRES_07218,	1
spore wall	GO:0031160	5	0.362699	1.61373	2	5	1311	5289	FGRRES_05315,FGRRES_15729_M,	1
outer plaque of spindle pole body	GO:0005824	6	0.362699	1.61373	2	5	1311	5289	FGRRES_13685,FGRRES_09994_M,	1
Golgi medial cisterna	GO:0005797	7	0.362699	1.61373	2	5	1311	5289	FGRRES_00688,FGRRES_08873_M,	1
inner plaque of spindle pole body	GO:0005822	6	0.362699	1.61373	2	5	1311	5289	FGRRES_13685,FGRRES_09994_M,	1
nuclear chromosome, telomeric region	GO:0000784	7	0.383019	1.17668	7	24	1311	5289	FGRRES_01457,FGRRES_00794,FGRRES_12711,FGRRES_06721,FGRRES_02622,FGRRES_09556,FGRRES_07406,	1
myosin complex	GO:0016459	4	0.393356	1.34477	3	9	1311	5289	FGRRES_01964,FGRRES_01410_M,FGRRES_15914_M,	1
catalytic step 1 spliceosome	GO:0071012	6	0.393356	1.34477	3	9	1311	5289	FGRRES_01300,FGRRES_09807,FGRRES_05138,	1
microtubule organizing center part	GO:0044450	5	0.393356	1.34477	3	9	1311	5289	FGRRES_06364,FGRRES_13685,FGRRES_09994_M,	1
U2-type catalytic step 1 spliceosome	GO:0071006	7	0.393356	1.34477	3	9	1311	5289	FGRRES_01300,FGRRES_09807,FGRRES_05138,	1
prospore membrane	GO:0005628	3	0.417958	1.18657	5	17	1311	5289	FGRRES_09928,FGRRES_01410_M,FGRRES_05315,FGRRES_00497,FGRRES_05890,	1
medial cortex	GO:0031097	4	0.417958	1.18657	5	17	1311	5289	FGRRES_01497,FGRRES_02092,FGRRES_07433_M,FGRRES_01410_M,FGRRES_10016,	1
ribose phosphate diphosphokinase complex	GO:0002189	6	0.43434	2.01716	1	2	1311	5289	FGRRES_10840,	1
DNA recombinase mediator complex	GO:0033061	4	0.43434	2.01716	1	2	1311	5289	FGRRES_00844,	1
Rhp55-Rhp57 complex	GO:0033062	5	0.43434	2.01716	1	2	1311	5289	FGRRES_00844,	1
chitosome	GO:0045009	6	0.43434	2.01716	1	2	1311	5289	FGRRES_10327,	1
cellular bud scar	GO:0005621	5	0.43434	2.01716	1	2	1311	5289	FGRRES_02022,	1
ARC complex	GO:0033167	6	0.43434	2.01716	1	2	1311	5289	FGRRES_00348,	1
CAF-1 complex	GO:0033186	4	0.43434	2.01716	1	2	1311	5289	FGRRES_06137,	1
Atg12-Atg5-Atg16 complex	GO:0034274	4	0.43434	2.01716	1	2	1311	5289	FGRRES_13550,	1
RNA polymerase II transcription repressor complex	GO:0090571	5	0.43434	2.01716	1	2	1311	5289	FGRRES_05498,	1
U2AF	GO:0089701	4	0.43434	2.01716	1	2	1311	5289	FGRRES_16766,	1
periplasmic space	GO:0042597	3	0.43434	2.01716	1	2	1311	5289	FGRRES_03614,	1
autophagosome membrane	GO:0000421	7	0.43434	2.01716	1	2	1311	5289	FGRRES_05547,	1
NatC complex	GO:0031417	6	0.43434	2.01716	1	2	1311	5289	FGRRES_06376,	1
NatB complex	GO:0031416	6	0.43434	2.01716	1	2	1311	5289	FGRRES_08691,	1
exocytic vesicle	GO:0070382	7	0.43434	2.01716	1	2	1311	5289	FGRRES_04237,	1
cell wall part	GO:0044426	4	0.43434	2.01716	1	2	1311	5289	FGRRES_02022,	1
Mcs4 RR-MAPKKK complex	GO:1990315	4	0.43434	2.01716	1	2	1311	5289	FGRRES_08691,	1
ribonucleoside-diphosphate reductase complex	GO:0005971	6	0.43434	2.01716	1	2	1311	5289	FGRRES_05174,	1
ESCRT-0 complex	GO:0033565	5	0.43434	2.01716	1	2	1311	5289	FGRRES_08492,	1
external encapsulating structure part	GO:0044462	3	0.43434	2.01716	1	2	1311	5289	FGRRES_02022,	1
negative cofactor 2 complex	GO:0017054	6	0.43434	2.01716	1	2	1311	5289	FGRRES_05498,	1
acetolactate synthase complex	GO:0005948	5	0.43434	2.01716	1	2	1311	5289	FGRRES_06282,	1
Mei2 nuclear dot complex	GO:0033620	5	0.43434	2.01716	1	2	1311	5289	FGRRES_20304,	1
sulfite reductase complex (NADPH)	GO:0009337	4	0.43434	2.01716	1	2	1311	5289	FGRRES_02482,	1
cellular bud neck septin collar	GO:0032174	5	0.43434	2.01716	1	2	1311	5289	FGRRES_07218,	1
septin collar	GO:0032173	7	0.43434	2.01716	1	2	1311	5289	FGRRES_07218,	1
R2TP complex	GO:0097255	4	0.43434	2.01716	1	2	1311	5289	FGRRES_06260,	1
L-cysteine desulfurase complex	GO:1990221	4	0.43434	2.01716	1	2	1311	5289	FGRRES_10049,	1
nuclear euchromatin	GO:0005719	7	0.43434	2.01716	1	2	1311	5289	FGRRES_09025,	1
euchromatin	GO:0000791	6	0.43434	2.01716	1	2	1311	5289	FGRRES_09025,	1
P-TEFb-cap methyltransferase complex	GO:0070693	4	0.43434	2.01716	1	2	1311	5289	FGRRES_16828,	1
chromatin silencing complex	GO:0005677	5	0.43434	2.01716	1	2	1311	5289	FGRRES_00892,	1
kinetochore microtubule	GO:0005828	8	0.43434	2.01716	1	2	1311	5289	FGRRES_06959,	1
early endosome membrane	GO:0031901	8	0.43434	2.01716	1	2	1311	5289	FGRRES_06542_M,	1
signal recognition particle receptor complex	GO:0005785	6	0.43434	2.01716	1	2	1311	5289	FGRRES_16673,	1
RENT complex	GO:0030869	6	0.43434	2.01716	1	2	1311	5289	FGRRES_00892,	1
secretory vesicle	GO:0099503	6	0.43434	2.01716	1	2	1311	5289	FGRRES_04237,	1
incipient cellular bud site	GO:0000131	4	0.437683	1.09036	10	37	1311	5289	FGRRES_00627,FGRRES_06149,FGRRES_01188,FGRRES_07024,FGRRES_15762,FGRRES_05261,FGRRES_16146,FGRRES_07218,FGRRES_06998,FGRRES_08568,	1
nuclear transcriptional repressor complex	GO:0090568	4	0.461064	1.34477	2	6	1311	5289	FGRRES_00892,FGRRES_05498,	1
N-terminal protein acetyltransferase complex	GO:0031414	5	0.461064	1.34477	2	6	1311	5289	FGRRES_06376,FGRRES_08691,	1
post-mRNA release spliceosomal complex	GO:0071014	6	0.461064	1.34477	2	6	1311	5289	FGRRES_10757,FGRRES_01300,	1
gamma-tubulin small complex	GO:0008275	5	0.461064	1.34477	2	6	1311	5289	FGRRES_13685,FGRRES_09994_M,	1
PAS complex	GO:0070772	5	0.461064	1.34477	2	6	1311	5289	FGRRES_10243,FGRRES_10000,	1
mitochondrial outer membrane translocase complex	GO:0005742	5	0.461064	1.34477	2	6	1311	5289	FGRRES_13127,FGRRES_02455,	1
telomeric heterochromatin	GO:0031933	7	0.461064	1.34477	2	6	1311	5289	FGRRES_00794,FGRRES_00460,	1
microbody lumen	GO:0031907	6	0.461064	1.34477	2	6	1311	5289	FGRRES_09503_M,FGRRES_00407,	1
gamma-tubulin small complex, spindle pole body	GO:0000928	6	0.461064	1.34477	2	6	1311	5289	FGRRES_13685,FGRRES_09994_M,	1
peroxisomal matrix	GO:0005782	7	0.461064	1.34477	2	6	1311	5289	FGRRES_09503_M,FGRRES_00407,	1
holo TFIIH complex	GO:0005675	5	0.468076	1.2103	3	10	1311	5289	FGRRES_04308,FGRRES_09978,FGRRES_07423,	1
SCF ubiquitin ligase complex	GO:0019005	6	0.47123	1.15266	4	14	1311	5289	FGRRES_05455,FGRRES_02237,FGRRES_06922,FGRRES_05134,	1
DNA-directed RNA polymerase III complex	GO:0005666	6	0.47123	1.15266	4	14	1311	5289	FGRRES_04273,FGRRES_06683,FGRRES_00365,FGRRES_06937,	1
fungal-type cell wall	GO:0009277	5	0.472944	1.12065	5	18	1311	5289	FGRRES_02022,FGRRES_17206,FGRRES_03309,FGRRES_05315,FGRRES_15729_M,	1
cellular bud tip	GO:0005934	4	0.475252	1.06166	10	38	1311	5289	FGRRES_06149,FGRRES_01188,FGRRES_16980_M,FGRRES_15762,FGRRES_05261,FGRRES_01854,FGRRES_16146,FGRRES_10272,FGRRES_08691,FGRRES_08936,	1
nuclear pore	GO:0005643	4	0.512284	1.03444	10	39	1311	5289	FGRRES_05671,FGRRES_01323,FGRRES_01324,FGRRES_09025,FGRRES_02233,FGRRES_09965,FGRRES_06845,FGRRES_09994_M,FGRRES_10865,FGRRES_04983,	1
lipid droplet	GO:0005811	5	0.522239	1.05243	6	23	1311	5289	FGRRES_06375,FGRRES_06215,FGRRES_02078,FGRRES_01349,FGRRES_00298,FGRRES_02783,	1
cellular bud	GO:0005933	3	0.524317	1.00858	21	84	1311	5289	FGRRES_06374,FGRRES_11029,FGRRES_16733,FGRRES_00627,FGRRES_06149,FGRRES_01188,FGRRES_16980_M,FGRRES_04370,FGRRES_07024,FGRRES_15762,FGRRES_05261,FGRRES_01854,FGRRES_16146,FGRRES_10272,FGRRES_05315,FGRRES_07218,FGRRES_06998,FGRRES_00444,FGRRES_08691,FGRRES_08568,FGRRES_08936,	1
integral component of endoplasmic reticulum membrane	GO:0030176	5	0.536942	1.00858	14	56	1311	5289	FGRRES_06375,FGRRES_06370,FGRRES_00688,FGRRES_11847,FGRRES_16673,FGRRES_02016,FGRRES_05775,FGRRES_07154,FGRRES_09863,FGRRES_02232,FGRRES_09635,FGRRES_10152,FGRRES_10897,FGRRES_08531,	1
intrinsic component of endoplasmic reticulum membrane	GO:0031227	4	0.536942	1.00858	14	56	1311	5289	FGRRES_06375,FGRRES_06370,FGRRES_00688,FGRRES_11847,FGRRES_16673,FGRRES_02016,FGRRES_05775,FGRRES_07154,FGRRES_09863,FGRRES_02232,FGRRES_09635,FGRRES_10152,FGRRES_10897,FGRRES_08531,	1
U2-type spliceosomal complex	GO:0005684	6	0.536942	1.00858	14	56	1311	5289	FGRRES_10757,FGRRES_16766,FGRRES_05857,FGRRES_05737_M,FGRRES_15928,FGRRES_01300,FGRRES_09807,FGRRES_04320,FGRRES_00169,FGRRES_07051,FGRRES_01010,FGRRES_03976,FGRRES_13551,FGRRES_05138,	1
actin cortical patch	GO:0030479	5	0.548496	1.00858	10	40	1311	5289	FGRRES_06374,FGRRES_08485,FGRRES_16765,FGRRES_02092,FGRRES_01316,FGRRES_01923,FGRRES_09982,FGRRES_01410_M,FGRRES_10361,FGRRES_10048,	1
core TFIIH complex	GO:0000439	4	0.549854	1.15266	2	7	1311	5289	FGRRES_04308,FGRRES_09978,	1
catalytic step 2 spliceosome	GO:0071013	6	0.549854	1.15266	2	7	1311	5289	FGRRES_01300,FGRRES_05138,	1
U2-type catalytic step 2 spliceosome	GO:0071007	7	0.549854	1.15266	2	7	1311	5289	FGRRES_01300,FGRRES_05138,	1
beta-galactosidase complex	GO:0009341	4	0.549854	1.15266	2	7	1311	5289	FGRRES_16875,FGRRES_03904,	1
Golgi transport complex	GO:0017119	4	0.549854	1.15266	2	7	1311	5289	FGRRES_07930,FGRRES_09851,	1
spliceosomal complex	GO:0005681	5	0.558231	0.993964	17	69	1311	5289	FGRRES_10757,FGRRES_16766,FGRRES_05857,FGRRES_05737_M,FGRRES_15928,FGRRES_01300,FGRRES_09807,FGRRES_01210,FGRRES_04320,FGRRES_17193,FGRRES_00169,FGRRES_07051,FGRRES_01010,FGRRES_03976,FGRRES_13551,FGRRES_12577_M,FGRRES_05138,	1
prespliceosome	GO:0071010	6	0.562179	1.00858	7	28	1311	5289	FGRRES_16766,FGRRES_05857,FGRRES_05737_M,FGRRES_15928,FGRRES_01300,FGRRES_04320,FGRRES_07051,	1
U2-type prespliceosome	GO:0071004	7	0.562179	1.00858	7	28	1311	5289	FGRRES_16766,FGRRES_05857,FGRRES_05737_M,FGRRES_15928,FGRRES_01300,FGRRES_04320,FGRRES_07051,	1
microtubule associated complex	GO:0005875	4	0.562179	1.00858	7	28	1311	5289	FGRRES_02054,FGRRES_06149,FGRRES_16784,FGRRES_16146,FGRRES_06959,FGRRES_16336,FGRRES_01690,	1
Tor2-Mei2-Ste11 complex	GO:0034064	4	0.574605	1.34477	1	3	1311	5289	FGRRES_20304,	1
RNA polymerase I transcription factor complex	GO:0000120	6	0.574605	1.34477	1	3	1311	5289	FGRRES_07086,	1
polarisome	GO:0000133	4	0.574605	1.34477	1	3	1311	5289	FGRRES_16146,	1
cellular bud neck septin ring	GO:0000144	5	0.574605	1.34477	1	3	1311	5289	FGRRES_05315,	1
1,3-beta-D-glucan synthase complex	GO:0000148	4	0.574605	1.34477	1	3	1311	5289	FGRRES_07946,	1
CoA-synthesizing protein complex	GO:1990143	4	0.574605	1.34477	1	3	1311	5289	FGRRES_08803,	1
Rix1 complex	GO:0097344	4	0.574605	1.34477	1	3	1311	5289	FGRRES_06661_M,	1
EKC/KEOPS complex	GO:0000408	4	0.574605	1.34477	1	3	1311	5289	FGRRES_07406,	1
nuclear pore cytoplasmic filaments	GO:0044614	4	0.574605	1.34477	1	3	1311	5289	FGRRES_09994_M,	1
medial cortical node	GO:0071341	4	0.574605	1.34477	1	3	1311	5289	FGRRES_01497,	1
mitotic checkpoint complex	GO:0033597	4	0.574605	1.34477	1	3	1311	5289	FGRRES_00660,	1
U2-type post-mRNA release spliceosomal complex	GO:0071008	7	0.574605	1.34477	1	3	1311	5289	FGRRES_01300,	1
magnesium-dependent protein serine/threonine phosphatase complex	GO:0005963	4	0.574605	1.34477	1	3	1311	5289	FGRRES_00852,	1
glycine cleavage complex	GO:0005960	5	0.574605	1.34477	1	3	1311	5289	FGRRES_08351,	1
TFIIK complex	GO:0070985	6	0.574605	1.34477	1	3	1311	5289	FGRRES_07423,	1
COP9 signalosome	GO:0008180	4	0.574605	1.34477	1	3	1311	5289	FGRRES_02584,	1
voltage-gated calcium channel complex	GO:0005891	7	0.574605	1.34477	1	3	1311	5289	FGRRES_01364,	1
FAL1-SGD1 complex	GO:0097078	4	0.574605	1.34477	1	3	1311	5289	FGRRES_05858,	1
linear element	GO:0030998	7	0.574605	1.34477	1	3	1311	5289	FGRRES_01157,	1
glycerol-3-phosphate dehydrogenase complex	GO:0009331	5	0.574605	1.34477	1	3	1311	5289	FGRRES_04299,	1
septin filament array	GO:0032160	7	0.574605	1.34477	1	3	1311	5289	FGRRES_05315,	1
anchored component of membrane	GO:0031225	4	0.574605	1.34477	1	3	1311	5289	FGRRES_02022,	1
RAVE complex	GO:0043291	4	0.574605	1.34477	1	3	1311	5289	FGRRES_06922,	1
calcium channel complex	GO:0034704	6	0.574605	1.34477	1	3	1311	5289	FGRRES_01364,	1
horsetail nucleus leading edge	GO:0071687	5	0.574605	1.34477	1	3	1311	5289	FGRRES_06364,	1
autophagosome	GO:0005776	6	0.574605	1.34477	1	3	1311	5289	FGRRES_05547,	1
Mre11 complex	GO:0030870	4	0.574605	1.34477	1	3	1311	5289	FGRRES_01699_M,	1
histone deacetylase complex	GO:0000118	6	0.576789	1.00858	5	20	1311	5289	FGRRES_16007,FGRRES_00297,FGRRES_00399,FGRRES_00460,FGRRES_08516,	1
integral component of mitochondrial inner membrane	GO:0031305	7	0.576789	1.00858	5	20	1311	5289	FGRRES_09261,FGRRES_06298,FGRRES_02455,FGRRES_01591,FGRRES_05070,	1
mitochondrial nucleoid	GO:0042645	3	0.576789	1.00858	5	20	1311	5289	FGRRES_05733,FGRRES_06282,FGRRES_04309,FGRRES_07257,FGRRES_10118,	1
nucleoid	GO:0009295	2	0.576789	1.00858	5	20	1311	5289	FGRRES_05733,FGRRES_06282,FGRRES_04309,FGRRES_07257,FGRRES_10118,	1
small nuclear ribonucleoprotein complex	GO:0030532	5	0.578749	0.986168	11	45	1311	5289	FGRRES_05737_M,FGRRES_01299,FGRRES_04286,FGRRES_01210,FGRRES_04320,FGRRES_01244,FGRRES_17193,FGRRES_07051,FGRRES_17287_M,FGRRES_01010,FGRRES_10001,	1
spliceosomal snRNP complex	GO:0097525	6	0.578749	0.986168	11	45	1311	5289	FGRRES_05737_M,FGRRES_01299,FGRRES_04286,FGRRES_01210,FGRRES_04320,FGRRES_01244,FGRRES_17193,FGRRES_07051,FGRRES_17287_M,FGRRES_01010,FGRRES_10001,	1
mitochondrial intermembrane space	GO:0005758	5	0.578749	0.986168	11	45	1311	5289	FGRRES_08386,FGRRES_10881_M,FGRRES_09833,FGRRES_10422,FGRRES_09503_M,FGRRES_00926,FGRRES_02543,FGRRES_02455,FGRRES_10144,FGRRES_05902,FGRRES_05543_M,	1
endocytic patch	GO:0061645	6	0.583639	0.983982	10	41	1311	5289	FGRRES_06374,FGRRES_08485,FGRRES_16765,FGRRES_02092,FGRRES_01316,FGRRES_01923,FGRRES_09982,FGRRES_01410_M,FGRRES_10361,FGRRES_10048,	1
transmembrane transporter complex	GO:1902495	3	0.587564	1.00858	4	16	1311	5289	FGRRES_01364,FGRRES_01196,FGRRES_02143,FGRRES_05160,	1
nuclear pericentric heterochromatin	GO:0031618	8	0.587564	1.00858	4	16	1311	5289	FGRRES_09025,FGRRES_00348,FGRRES_00460,FGRRES_02659,	1
pericentric heterochromatin	GO:0005721	7	0.587564	1.00858	4	16	1311	5289	FGRRES_09025,FGRRES_00348,FGRRES_00460,FGRRES_02659,	1
cell cortex region	GO:0099738	7	0.58923	0.981322	9	37	1311	5289	FGRRES_01497,FGRRES_02092,FGRRES_07433_M,FGRRES_01188,FGRRES_01410_M,FGRRES_16146,FGRRES_06992,FGRRES_10016,FGRRES_08537,	1
tricarboxylic acid cycle enzyme complex	GO:0045239	4	0.602924	1.00858	3	12	1311	5289	FGRRES_05733,FGRRES_04309,FGRRES_09580,	1
DNA-directed RNA polymerase II, core complex	GO:0005665	6	0.602924	1.00858	3	12	1311	5289	FGRRES_04273,FGRRES_06683,FGRRES_02659,	1
mRNA cleavage and polyadenylation specificity factor complex	GO:0005847	5	0.602924	1.00858	3	12	1311	5289	FGRRES_11865,FGRRES_10795,FGRRES_15738_M,	1
cell cortex part	GO:0044448	5	0.60346	0.97256	27	112	1311	5289	FGRRES_06374,FGRRES_08485,FGRRES_16765,FGRRES_16733,FGRRES_01497,FGRRES_02092,FGRRES_06392_M,FGRRES_01316,FGRRES_07433_M,FGRRES_01188,FGRRES_01923,FGRRES_09982,FGRRES_01410_M,FGRRES_10361,FGRRES_16146,FGRRES_07284,FGRRES_09796,FGRRES_05315,FGRRES_07218,FGRRES_06992,FGRRES_10016,FGRRES_10048,FGRRES_08568,FGRRES_04983,FGRRES_08531,FGRRES_07419,FGRRES_08537,	1
nuclear heterochromatin	GO:0005720	7	0.612735	0.968238	6	25	1311	5289	FGRRES_00794,FGRRES_09025,FGRRES_00348,FGRRES_06661_M,FGRRES_00460,FGRRES_02659,	1
nuclear membrane	GO:0031965	4	0.612735	0.968238	6	25	1311	5289	FGRRES_13254_M,FGRRES_00866,FGRRES_02233,FGRRES_09965,FGRRES_13626_M,FGRRES_10865,	1
cytoskeletal part	GO:0044430	4	0.613906	0.977172	70	289	1311	5289	FGRRES_06364,FGRRES_06374,FGRRES_08485,FGRRES_00660,FGRRES_06272,FGRRES_17310,FGRRES_16765,FGRRES_01497,FGRRES_02054,FGRRES_00627,FGRRES_08405,FGRRES_02092,FGRRES_10796,FGRRES_06113,FGRRES_06149,FGRRES_07947,FGRRES_07962,FGRRES_06165,FGRRES_01386,FGRRES_06181,FGRRES_01316,FGRRES_05502,FGRRES_01964,FGRRES_16980_M,FGRRES_04378,FGRRES_01923,FGRRES_05450,FGRRES_06070,FGRRES_01065,FGRRES_09982,FGRRES_…	1
transferase complex, transferring phosphorus-containing groups	GO:0061695	5	0.615039	0.971226	39	162	1311	5289	FGRRES_01438,FGRRES_00621,FGRRES_05853,FGRRES_10606,FGRRES_04308,FGRRES_11782,FGRRES_16586,FGRRES_04273,FGRRES_04291,FGRRES_17112,FGRRES_06032,FGRRES_05516,FGRRES_07623,FGRRES_15847,FGRRES_17004,FGRRES_08158,FGRRES_01052,FGRRES_06683,FGRRES_16828,FGRRES_09978,FGRRES_04470,FGRRES_05550,FGRRES_04619,FGRRES_01035,FGRRES_10243,FGRRES_00365,FGRRES_16113,FGRRES_06937,FGRRES_06948,FGRRES_16512,FGRRES_05…	1
nucleus	GO:0005634	5	0.617025	0.992987	589	2393	1311	5289	FGRRES_10757,FGRRES_06364,FGRRES_13137,FGRRES_00695,FGRRES_06369,FGRRES_06374,FGRRES_06372,FGRRES_06243,FGRRES_06376,FGRRES_06340,FGRRES_08498,FGRRES_13110,FGRRES_08492,FGRRES_02881_M,FGRRES_00660,FGRRES_06297,FGRRES_10728,FGRRES_06168_M,FGRRES_17351,FGRRES_06284,FGRRES_06272,FGRRES_06260,FGRRES_17377,FGRRES_17370,FGRRES_12606_M,FGRRES_17323,FGRRES_17310,FGRRES_09831_M,FGRRES_17309,FGRRES_17327,F…	1
intrinsic component of mitochondrial inner membrane	GO:0031304	6	0.624425	0.960554	5	21	1311	5289	FGRRES_09261,FGRRES_06298,FGRRES_02455,FGRRES_01591,FGRRES_05070,	1
proton-transporting V-type ATPase, V0 domain	GO:0033179	6	0.627772	1.00858	2	8	1311	5289	FGRRES_17670_M,FGRRES_16433_M,	1
septin ring	GO:0005940	7	0.627772	1.00858	2	8	1311	5289	FGRRES_05315,FGRRES_07218,	1
cortical actin cytoskeleton	GO:0030864	7	0.630109	0.953568	13	55	1311	5289	FGRRES_06374,FGRRES_08485,FGRRES_16765,FGRRES_01497,FGRRES_02092,FGRRES_01316,FGRRES_01923,FGRRES_09982,FGRRES_01410_M,FGRRES_10361,FGRRES_07284,FGRRES_10048,FGRRES_08568,	1
cytoskeleton	GO:0005856	5	0.638629	0.970973	71	295	1311	5289	FGRRES_06364,FGRRES_06374,FGRRES_08485,FGRRES_00660,FGRRES_06272,FGRRES_17310,FGRRES_16765,FGRRES_01497,FGRRES_02054,FGRRES_00627,FGRRES_08405,FGRRES_02092,FGRRES_10796,FGRRES_06113,FGRRES_06149,FGRRES_07947,FGRRES_07962,FGRRES_06165,FGRRES_06392_M,FGRRES_01386,FGRRES_06181,FGRRES_01316,FGRRES_05502,FGRRES_01964,FGRRES_16980_M,FGRRES_04378,FGRRES_01923,FGRRES_05450,FGRRES_06070,FGRRES_01065,FGRRE…	1
fungal-type vacuole	GO:0000324	7	0.649033	0.959382	39	164	1311	5289	FGRRES_06215,FGRRES_07832,FGRRES_16723,FGRRES_06685_M,FGRRES_16691,FGRRES_04178,FGRRES_06133,FGRRES_04242,FGRRES_09021,FGRRES_09806_M,FGRRES_11250,FGRRES_03379,FGRRES_04370,FGRRES_05446,FGRRES_07070,FGRRES_03248,FGRRES_01150,FGRRES_06815_M,FGRRES_05547,FGRRES_07373,FGRRES_01006,FGRRES_03347_M,FGRRES_10243,FGRRES_06895,FGRRES_06542_M,FGRRES_00371,FGRRES_02400,FGRRES_16123_4_M,FGRRES_05001_M,FGRRES…	1
storage vacuole	GO:0000322	6	0.649033	0.959382	39	164	1311	5289	FGRRES_06215,FGRRES_07832,FGRRES_16723,FGRRES_06685_M,FGRRES_16691,FGRRES_04178,FGRRES_06133,FGRRES_04242,FGRRES_09021,FGRRES_09806_M,FGRRES_11250,FGRRES_03379,FGRRES_04370,FGRRES_05446,FGRRES_07070,FGRRES_03248,FGRRES_01150,FGRRES_06815_M,FGRRES_05547,FGRRES_07373,FGRRES_01006,FGRRES_03347_M,FGRRES_10243,FGRRES_06895,FGRRES_06542_M,FGRRES_00371,FGRRES_02400,FGRRES_16123_4_M,FGRRES_05001_M,FGRRES…	1
lytic vacuole	GO:0000323	6	0.649033	0.959382	39	164	1311	5289	FGRRES_06215,FGRRES_07832,FGRRES_16723,FGRRES_06685_M,FGRRES_16691,FGRRES_04178,FGRRES_06133,FGRRES_04242,FGRRES_09021,FGRRES_09806_M,FGRRES_11250,FGRRES_03379,FGRRES_04370,FGRRES_05446,FGRRES_07070,FGRRES_03248,FGRRES_01150,FGRRES_06815_M,FGRRES_05547,FGRRES_07373,FGRRES_01006,FGRRES_03347_M,FGRRES_10243,FGRRES_06895,FGRRES_06542_M,FGRRES_00371,FGRRES_02400,FGRRES_16123_4_M,FGRRES_05001_M,FGRRES…	1
transporter complex	GO:1990351	3	0.654185	0.930998	6	26	1311	5289	FGRRES_09281,FGRRES_01364,FGRRES_01196,FGRRES_02143,FGRRES_05543_M,FGRRES_05160,	1
outer membrane	GO:0019867	3	0.658276	0.93654	13	56	1311	5289	FGRRES_13127,FGRRES_06370,FGRRES_12821,FGRRES_03554,FGRRES_01395,FGRRES_09927,FGRRES_00903,FGRRES_00926,FGRRES_02455,FGRRES_02783,FGRRES_08694,FGRRES_07588,FGRRES_05154,	1
carboxy-terminal domain protein kinase complex	GO:0032806	4	0.66122	0.930998	3	13	1311	5289	FGRRES_04308,FGRRES_09978,FGRRES_07423,	1
cell septum	GO:0030428	3	0.66122	0.930998	3	13	1311	5289	FGRRES_02022,FGRRES_16633,FGRRES_17518,	1
synaptonemal structure	GO:0099086	6	0.680109	1.00858	1	4	1311	5289	FGRRES_01157,	1
tRNA (m1A) methyltransferase complex	GO:0031515	6	0.680109	1.00858	1	4	1311	5289	FGRRES_05964,	1
nuclear rDNA heterochromatin	GO:1902377	8	0.680109	1.00858	1	4	1311	5289	FGRRES_00460,	1
mating projection base	GO:0001400	5	0.680109	1.00858	1	4	1311	5289	FGRRES_05315,	1
TRC complex	GO:0072380	5	0.680109	1.00858	1	4	1311	5289	FGRRES_05957,	1
ER membrane insertion complex	GO:0072379	4	0.680109	1.00858	1	4	1311	5289	FGRRES_05957,	1
delta DNA polymerase complex	GO:0043625	5	0.680109	1.00858	1	4	1311	5289	FGRRES_06032,	1
pre-autophagosomal structure membrane	GO:0034045	5	0.680109	1.00858	1	4	1311	5289	FGRRES_13550,	1
RecQ helicase-Topo III complex	GO:0031422	4	0.680109	1.00858	1	4	1311	5289	FGRRES_16705_M,	1
mitochondrial intermembrane space protein transporter complex	GO:0042719	6	0.680109	1.00858	1	4	1311	5289	FGRRES_05543_M,	1
non-growing cell tip	GO:0035839	4	0.680109	1.00858	1	4	1311	5289	FGRRES_16146,	1
mitochondrial alpha-ketoglutarate dehydrogenase complex	GO:0005947	6	0.680109	1.00858	1	4	1311	5289	FGRRES_04309,	1
biotin carboxylase complex	GO:0009343	5	0.680109	1.00858	1	4	1311	5289	FGRRES_07075_M,	1
mitochondrial oxoglutarate dehydrogenase complex	GO:0009353	7	0.680109	1.00858	1	4	1311	5289	FGRRES_04309,	1
integral component of vacuolar membrane	GO:0031166	6	0.680109	1.00858	1	4	1311	5289	FGRRES_05147,	1
septin complex	GO:0031105	4	0.680109	1.00858	1	4	1311	5289	FGRRES_05315,	1
cation channel complex	GO:0034703	5	0.680109	1.00858	1	4	1311	5289	FGRRES_01364,	1
ion channel complex	GO:0034702	4	0.680109	1.00858	1	4	1311	5289	FGRRES_01364,	1
nuclear telomeric heterochromatin	GO:0005724	8	0.680109	1.00858	1	4	1311	5289	FGRRES_00794,	1
GINS complex	GO:0000811	5	0.680109	1.00858	1	4	1311	5289	FGRRES_01007,	1
microtubule cytoskeleton	GO:0015630	6	0.682243	0.953568	52	220	1311	5289	FGRRES_06364,FGRRES_00660,FGRRES_06272,FGRRES_17310,FGRRES_01497,FGRRES_02054,FGRRES_00627,FGRRES_08405,FGRRES_10796,FGRRES_06113,FGRRES_06149,FGRRES_07947,FGRRES_07962,FGRRES_06165,FGRRES_01386,FGRRES_06181,FGRRES_05502,FGRRES_16980_M,FGRRES_04378,FGRRES_05450,FGRRES_06070,FGRRES_01065,FGRRES_16784,FGRRES_07262_M,FGRRES_00270,FGRRES_02564,FGRRES_13685,FGRRES_01035,FGRRES_09994_M,FGRRES_16146,FGR…	1
integral component of organelle membrane	GO:0031301	5	0.682877	0.934265	22	95	1311	5289	FGRRES_00688,FGRRES_09261,FGRRES_06298,FGRRES_09281,FGRRES_16726,FGRRES_16739,FGRRES_17207,FGRRES_04278,FGRRES_04412,FGRRES_09938,FGRRES_00926,FGRRES_17252_M,FGRRES_06856,FGRRES_02455,FGRRES_02714,FGRRES_01591,FGRRES_08694,FGRRES_05070,FGRRES_05082,FGRRES_10091,FGRRES_13014,FGRRES_05147,	1
mating projection	GO:0005937	5	0.692614	0.913432	12	53	1311	5289	FGRRES_04104,FGRRES_00627,FGRRES_02092,FGRRES_06149,FGRRES_16633,FGRRES_01316,FGRRES_01188,FGRRES_10361,FGRRES_05261,FGRRES_05315,FGRRES_10967,FGRRES_10048,	1
respiratory chain	GO:0070469	3	0.692778	0.896517	6	27	1311	5289	FGRRES_13137,FGRRES_09341,FGRRES_10881_M,FGRRES_01342,FGRRES_01196,FGRRES_01981,	1
phosphatidylinositol 3-kinase complex, class III	GO:0035032	4	0.694748	0.896517	2	9	1311	5289	FGRRES_10243,FGRRES_10000,	1
phosphatidylinositol 3-kinase complex	GO:0005942	3	0.694748	0.896517	2	9	1311	5289	FGRRES_10243,FGRRES_10000,	1
mating-type region heterochromatin	GO:0031934	7	0.694748	0.896517	2	9	1311	5289	FGRRES_00348,FGRRES_00460,	1
actin cytoskeleton	GO:0015629	6	0.69701	0.916892	15	66	1311	5289	FGRRES_06374,FGRRES_08485,FGRRES_16765,FGRRES_01497,FGRRES_02092,FGRRES_01316,FGRRES_01964,FGRRES_01923,FGRRES_09982,FGRRES_01410_M,FGRRES_10361,FGRRES_15914_M,FGRRES_07284,FGRRES_10048,FGRRES_08568,	1
organelle envelope lumen	GO:0031970	4	0.70078	0.905665	11	49	1311	5289	FGRRES_08386,FGRRES_10881_M,FGRRES_09833,FGRRES_10422,FGRRES_09503_M,FGRRES_00926,FGRRES_02543,FGRRES_02455,FGRRES_10144,FGRRES_05902,FGRRES_05543_M,	1
nuclear ubiquitin ligase complex	GO:0000152	5	0.709359	0.877027	5	23	1311	5289	FGRRES_00660,FGRRES_10728,FGRRES_05455,FGRRES_02237,FGRRES_06922,	1
spindle pole body	GO:0005816	6	0.711693	0.933109	34	147	1311	5289	FGRRES_06364,FGRRES_00660,FGRRES_06272,FGRRES_01497,FGRRES_02054,FGRRES_00627,FGRRES_08405,FGRRES_10796,FGRRES_06113,FGRRES_01386,FGRRES_06181,FGRRES_05502,FGRRES_16980_M,FGRRES_04378,FGRRES_06070,FGRRES_01065,FGRRES_07262_M,FGRRES_02564,FGRRES_13685,FGRRES_09994_M,FGRRES_02476,FGRRES_06948,FGRRES_00497,FGRRES_01553,FGRRES_10100,FGRRES_06661_M,FGRRES_09408,FGRRES_05081,FGRRES_01645,FGRRES_05630_M…	1
Ino80 complex	GO:0031011	5	0.713036	0.864498	3	14	1311	5289	FGRRES_06260,FGRRES_02026,FGRRES_00477,	1
vacuole	GO:0005773	5	0.714019	0.939208	44	189	1311	5289	FGRRES_06215,FGRRES_07832,FGRRES_16723,FGRRES_06685_M,FGRRES_16691,FGRRES_04178,FGRRES_17670_M,FGRRES_06133,FGRRES_04242,FGRRES_09021,FGRRES_09806_M,FGRRES_11250,FGRRES_03379,FGRRES_04370,FGRRES_00852,FGRRES_00866,FGRRES_05446,FGRRES_05621,FGRRES_07070,FGRRES_03248,FGRRES_01150,FGRRES_06815_M,FGRRES_05547,FGRRES_07373,FGRRES_01006,FGRRES_03347_M,FGRRES_10243,FGRRES_06895,FGRRES_06542_M,FGRRES_003…	1
plasma membrane bounded cell projection	GO:0120025	4	0.718839	0.896517	12	54	1311	5289	FGRRES_04104,FGRRES_00627,FGRRES_02092,FGRRES_06149,FGRRES_16633,FGRRES_01316,FGRRES_01188,FGRRES_10361,FGRRES_05261,FGRRES_05315,FGRRES_10967,FGRRES_10048,	1
intrinsic component of organelle membrane	GO:0031300	4	0.741501	0.905665	22	98	1311	5289	FGRRES_00688,FGRRES_09261,FGRRES_06298,FGRRES_09281,FGRRES_16726,FGRRES_16739,FGRRES_17207,FGRRES_04278,FGRRES_04412,FGRRES_09938,FGRRES_00926,FGRRES_17252_M,FGRRES_06856,FGRRES_02455,FGRRES_02714,FGRRES_01591,FGRRES_08694,FGRRES_05070,FGRRES_05082,FGRRES_10091,FGRRES_13014,FGRRES_05147,	1
cell projection	GO:0042995	3	0.7436	0.880216	12	55	1311	5289	FGRRES_04104,FGRRES_00627,FGRRES_02092,FGRRES_06149,FGRRES_16633,FGRRES_01316,FGRRES_01188,FGRRES_10361,FGRRES_05261,FGRRES_05315,FGRRES_10967,FGRRES_10048,	1
mitotic spindle pole body	GO:0044732	7	0.745186	0.914027	29	128	1311	5289	FGRRES_06364,FGRRES_00660,FGRRES_06272,FGRRES_01497,FGRRES_00627,FGRRES_08405,FGRRES_10796,FGRRES_06113,FGRRES_01386,FGRRES_06181,FGRRES_05502,FGRRES_04378,FGRRES_06070,FGRRES_01065,FGRRES_07262_M,FGRRES_02564,FGRRES_02476,FGRRES_06948,FGRRES_01553,FGRRES_10100,FGRRES_06661_M,FGRRES_09408,FGRRES_05081,FGRRES_01645,FGRRES_05630_M,FGRRES_10865,FGRRES_07457,FGRRES_08501,FGRRES_07452,	1
endonuclease complex	GO:1905348	4	0.751416	0.806865	2	10	1311	5289	FGRRES_01490,FGRRES_16998,	1
endoribonuclease complex	GO:1902555	5	0.751416	0.806865	2	10	1311	5289	FGRRES_01490,FGRRES_16998,	1
septin cytoskeleton	GO:0032156	6	0.751416	0.806865	2	10	1311	5289	FGRRES_05315,FGRRES_07218,	1
chromosome, centromeric core domain	GO:0034506	6	0.751416	0.806865	2	10	1311	5289	FGRRES_07020,FGRRES_10157,	1
Golgi membrane	GO:0000139	6	0.756972	0.884236	16	73	1311	5289	FGRRES_00688,FGRRES_16726,FGRRES_16739,FGRRES_17207,FGRRES_04278,FGRRES_04412,FGRRES_06391_M,FGRRES_04393,FGRRES_17252_M,FGRRES_06856,FGRRES_06542_M,FGRRES_02714,FGRRES_05082,FGRRES_10091,FGRRES_13014,FGRRES_09591,	1
cortical cytoskeleton	GO:0030863	6	0.758217	0.874104	13	60	1311	5289	FGRRES_06374,FGRRES_08485,FGRRES_16765,FGRRES_01497,FGRRES_02092,FGRRES_01316,FGRRES_01923,FGRRES_09982,FGRRES_01410_M,FGRRES_10361,FGRRES_07284,FGRRES_10048,FGRRES_08568,	1
SNARE complex	GO:0031201	5	0.758498	0.806865	3	15	1311	5289	FGRRES_06277,FGRRES_16691,FGRRES_09021,	1
Cdc73/Paf1 complex	GO:0016593	5	0.759461	0.806865	1	5	1311	5289	FGRRES_06948,	1
chloroplast envelope	GO:0009941	6	0.759461	0.806865	1	5	1311	5289	FGRRES_09927,	1
ASTRA complex	GO:0070209	4	0.759461	0.806865	1	5	1311	5289	FGRRES_06260,	1
meiotic spindle pole body	GO:0035974	7	0.759461	0.806865	1	5	1311	5289	FGRRES_00497,	1
Cul3-RING ubiquitin ligase complex	GO:0031463	6	0.759461	0.806865	1	5	1311	5289	FGRRES_00303,	1
Ctf18 RFC-like complex	GO:0031390	4	0.759461	0.806865	1	5	1311	5289	FGRRES_00329,	1
Rad17 RFC-like complex	GO:0031389	4	0.759461	0.806865	1	5	1311	5289	FGRRES_00329,	1
mitochondrial inner membrane peptidase complex	GO:0042720	5	0.759461	0.806865	1	5	1311	5289	FGRRES_00861,	1
nuclear pore central transport channel	GO:0044613	4	0.759461	0.806865	1	5	1311	5289	FGRRES_06845,	1
chloroplast part	GO:0044434	6	0.759461	0.806865	1	5	1311	5289	FGRRES_09927,	1
plastid part	GO:0044435	5	0.759461	0.806865	1	5	1311	5289	FGRRES_09927,	1
CENP-A containing chromatin	GO:0061638	6	0.759461	0.806865	1	5	1311	5289	FGRRES_10157,	1
acetyl-CoA carboxylase complex	GO:0009317	5	0.759461	0.806865	1	5	1311	5289	FGRRES_07075_M,	1
single-stranded DNA-dependent ATP-dependent DNA helicase complex	GO:0017117	5	0.759461	0.806865	1	5	1311	5289	FGRRES_06922,	1
oxoglutarate dehydrogenase complex	GO:0045252	6	0.759461	0.806865	1	5	1311	5289	FGRRES_04309,	1
dihydrolipoyl dehydrogenase complex	GO:0045240	5	0.759461	0.806865	1	5	1311	5289	FGRRES_04309,	1
Rpd3S complex	GO:0032221	8	0.759461	0.806865	1	5	1311	5289	FGRRES_08516,	1
plastid envelope	GO:0009526	5	0.759461	0.806865	1	5	1311	5289	FGRRES_09927,	1
chloroplast	GO:0009507	6	0.759461	0.806865	1	5	1311	5289	FGRRES_09927,	1
DNA replication factor C complex	GO:0005663	4	0.759461	0.806865	1	5	1311	5289	FGRRES_00329,	1
plastid	GO:0009536	5	0.759461	0.806865	1	5	1311	5289	FGRRES_09927,	1
Ada2/Gcn5/Ada3 transcription activator complex	GO:0005671	4	0.759461	0.806865	1	5	1311	5289	FGRRES_00280_M,	1
early endosome	GO:0005769	7	0.759461	0.806865	1	5	1311	5289	FGRRES_06542_M,	1
cellular bud neck	GO:0005935	4	0.764041	0.877027	15	69	1311	5289	FGRRES_06149,FGRRES_01188,FGRRES_16980_M,FGRRES_07024,FGRRES_15762,FGRRES_05261,FGRRES_01854,FGRRES_16146,FGRRES_05315,FGRRES_07218,FGRRES_06998,FGRRES_00444,FGRRES_08691,FGRRES_08568,FGRRES_08936,	1
polysome	GO:0005844	5	0.768825	0.806865	4	20	1311	5289	FGRRES_07241_M,FGRRES_02785,FGRRES_08644,FGRRES_08532,	1
mRNA cleavage factor complex	GO:0005849	4	0.768825	0.806865	4	20	1311	5289	FGRRES_11865,FGRRES_10795,FGRRES_15738_M,FGRRES_04998,	1
Golgi subcompartment	GO:0098791	5	0.770182	0.886665	20	91	1311	5289	FGRRES_00688,FGRRES_16726,FGRRES_16739,FGRRES_17207,FGRRES_04278,FGRRES_04412,FGRRES_06391_M,FGRRES_04393,FGRRES_17252_M,FGRRES_06743,FGRRES_06856,FGRRES_06542_M,FGRRES_08873_M,FGRRES_10145,FGRRES_02714,FGRRES_20264,FGRRES_05082,FGRRES_10091,FGRRES_13014,FGRRES_09591,	1
cell division site part	GO:0032155	3	0.774129	0.844394	9	43	1311	5289	FGRRES_01497,FGRRES_02092,FGRRES_07433_M,FGRRES_01410_M,FGRRES_07284,FGRRES_05315,FGRRES_07218,FGRRES_10016,FGRRES_08568,	1
tubulin complex	GO:0045298	4	0.774403	0.830596	7	34	1311	5289	FGRRES_02054,FGRRES_06149,FGRRES_05450,FGRRES_16784,FGRRES_05930,FGRRES_00510,FGRRES_01690,	1
microtubule organizing center	GO:0005815	5	0.785377	0.902415	34	152	1311	5289	FGRRES_06364,FGRRES_00660,FGRRES_06272,FGRRES_01497,FGRRES_02054,FGRRES_00627,FGRRES_08405,FGRRES_10796,FGRRES_06113,FGRRES_01386,FGRRES_06181,FGRRES_05502,FGRRES_16980_M,FGRRES_04378,FGRRES_06070,FGRRES_01065,FGRRES_07262_M,FGRRES_02564,FGRRES_13685,FGRRES_09994_M,FGRRES_02476,FGRRES_06948,FGRRES_00497,FGRRES_01553,FGRRES_10100,FGRRES_06661_M,FGRRES_09408,FGRRES_05081,FGRRES_01645,FGRRES_05630_M…	1
chromosomal region	GO:0098687	5	0.793382	0.88472	25	114	1311	5289	FGRRES_16767,FGRRES_01457,FGRRES_00794,FGRRES_06137,FGRRES_01347,FGRRES_09025,FGRRES_12711,FGRRES_16980_M,FGRRES_06721,FGRRES_01157,FGRRES_07020,FGRRES_08806,FGRRES_00348,FGRRES_01699_M,FGRRES_06922,FGRRES_06959,FGRRES_01551,FGRRES_10157,FGRRES_00460,FGRRES_02622,FGRRES_00280_M,FGRRES_09556,FGRRES_02659,FGRRES_07406,FGRRES_08501,	1
U1 snRNP	GO:0005685	7	0.797944	0.756436	3	16	1311	5289	FGRRES_05737_M,FGRRES_04286,FGRRES_01244,	1
commitment complex	GO:0000243	7	0.798767	0.733514	2	11	1311	5289	FGRRES_16766,FGRRES_15928,	1
endoplasmic reticulum	GO:0005783	5	0.800008	0.935496	96	414	1311	5289	FGRRES_06375,FGRRES_06370,FGRRES_00688,FGRRES_06215,FGRRES_09281,FGRRES_07180_M,FGRRES_09297,FGRRES_11847,FGRRES_08623_M,FGRRES_16739,FGRRES_16733,FGRRES_06685_M,FGRRES_04102,FGRRES_16686,FGRRES_16673,FGRRES_02016,FGRRES_01408,FGRRES_20078,FGRRES_06107,FGRRES_17670_M,FGRRES_06139,FGRRES_12821,FGRRES_01364,FGRRES_04237,FGRRES_04242,FGRRES_01349,FGRRES_08314,FGRRES_05775,FGRRES_00898,FGRRES_04412,F…	1
DNA helicase complex	GO:0033202	4	0.802802	0.768443	4	21	1311	5289	FGRRES_06260,FGRRES_02026,FGRRES_06922,FGRRES_00477,	1
late endosome	GO:0005770	7	0.802802	0.768443	4	21	1311	5289	FGRRES_11847,FGRRES_16691,FGRRES_15771,FGRRES_10864,	1
lytic vacuole membrane	GO:0098852	7	0.803368	0.881449	26	119	1311	5289	FGRRES_06215,FGRRES_07832,FGRRES_16723,FGRRES_06685_M,FGRRES_16691,FGRRES_04178,FGRRES_04242,FGRRES_09021,FGRRES_09806_M,FGRRES_04370,FGRRES_07070,FGRRES_01150,FGRRES_05547,FGRRES_01006,FGRRES_10243,FGRRES_06542_M,FGRRES_00371,FGRRES_02400,FGRRES_16123_4_M,FGRRES_05001_M,FGRRES_05896,FGRRES_01606,FGRRES_10000,FGRRES_10864,FGRRES_15855_M,FGRRES_07466,	1
fungal-type vacuole membrane	GO:0000329	8	0.803368	0.881449	26	119	1311	5289	FGRRES_06215,FGRRES_07832,FGRRES_16723,FGRRES_06685_M,FGRRES_16691,FGRRES_04178,FGRRES_04242,FGRRES_09021,FGRRES_09806_M,FGRRES_04370,FGRRES_07070,FGRRES_01150,FGRRES_05547,FGRRES_01006,FGRRES_10243,FGRRES_06542_M,FGRRES_00371,FGRRES_02400,FGRRES_16123_4_M,FGRRES_05001_M,FGRRES_05896,FGRRES_01606,FGRRES_10000,FGRRES_10864,FGRRES_15855_M,FGRRES_07466,	1
integral component of mitochondrial membrane	GO:0032592	6	0.810881	0.806865	8	40	1311	5289	FGRRES_09261,FGRRES_06298,FGRRES_09938,FGRRES_00926,FGRRES_02455,FGRRES_01591,FGRRES_08694,FGRRES_05070,	1
site of polarized growth	GO:0030427	3	0.812773	0.872286	24	111	1311	5289	FGRRES_00627,FGRRES_06149,FGRRES_16633,FGRRES_01316,FGRRES_01188,FGRRES_16980_M,FGRRES_04068_M,FGRRES_01410_M,FGRRES_07024,FGRRES_15762,FGRRES_10361,FGRRES_05261,FGRRES_01854,FGRRES_16146,FGRRES_10272,FGRRES_05315,FGRRES_07218,FGRRES_06998,FGRRES_10967,FGRRES_00444,FGRRES_08691,FGRRES_10048,FGRRES_08568,FGRRES_08936,	1
mitochondrial outer membrane	GO:0005741	5	0.818552	0.821807	11	54	1311	5289	FGRRES_13127,FGRRES_06370,FGRRES_12821,FGRRES_01395,FGRRES_09927,FGRRES_00903,FGRRES_00926,FGRRES_02455,FGRRES_02783,FGRRES_08694,FGRRES_05154,	1
organelle outer membrane	GO:0031968	4	0.818552	0.821807	11	54	1311	5289	FGRRES_13127,FGRRES_06370,FGRRES_12821,FGRRES_01395,FGRRES_09927,FGRRES_00903,FGRRES_00926,FGRRES_02455,FGRRES_02783,FGRRES_08694,FGRRES_05154,	1
GPI-anchor transamidase complex	GO:0042765	3	0.819141	0.672387	1	6	1311	5289	FGRRES_09635,	1
intrinsic component of vacuolar membrane	GO:0031310	5	0.819141	0.672387	1	6	1311	5289	FGRRES_05147,	1
MCM complex	GO:0042555	4	0.819141	0.672387	1	6	1311	5289	FGRRES_02622,	1
Elg1 RFC-like complex	GO:0031391	4	0.819141	0.672387	1	6	1311	5289	FGRRES_00329,	1
protein kinase CK2 complex	GO:0005956	4	0.819141	0.672387	1	6	1311	5289	FGRRES_16299,	1
Set1C/COMPASS complex	GO:0048188	6	0.819141	0.672387	1	6	1311	5289	FGRRES_16832,	1
peroxisomal importomer complex	GO:1990429	4	0.819141	0.672387	1	6	1311	5289	FGRRES_09281,	1
Smc5-Smc6 complex	GO:0030915	4	0.819141	0.672387	1	6	1311	5289	FGRRES_09562,	1
ATPase complex	GO:1904949	4	0.819141	0.672387	1	6	1311	5289	FGRRES_06922,	1
HOPS complex	GO:0030897	5	0.819141	0.672387	1	6	1311	5289	FGRRES_16123_4_M,	1
vacuolar membrane	GO:0005774	6	0.821657	0.875667	28	129	1311	5289	FGRRES_06215,FGRRES_07832,FGRRES_16723,FGRRES_06685_M,FGRRES_16691,FGRRES_04178,FGRRES_04242,FGRRES_09021,FGRRES_09806_M,FGRRES_04370,FGRRES_05621,FGRRES_07070,FGRRES_01150,FGRRES_05547,FGRRES_01006,FGRRES_10243,FGRRES_06542_M,FGRRES_00371,FGRRES_02400,FGRRES_16123_4_M,FGRRES_05001_M,FGRRES_05896,FGRRES_01606,FGRRES_10000,FGRRES_10864,FGRRES_15855_M,FGRRES_05147,FGRRES_07466,	1
cullin-RING ubiquitin ligase complex	GO:0031461	5	0.825162	0.784452	7	36	1311	5289	FGRRES_00660,FGRRES_10728,FGRRES_05455,FGRRES_02237,FGRRES_00303,FGRRES_06922,FGRRES_05134,	1
cell cortex	GO:0005938	6	0.825954	0.871414	27	125	1311	5289	FGRRES_06374,FGRRES_08485,FGRRES_16765,FGRRES_16733,FGRRES_01497,FGRRES_02092,FGRRES_06392_M,FGRRES_01316,FGRRES_07433_M,FGRRES_01188,FGRRES_01923,FGRRES_09982,FGRRES_01410_M,FGRRES_10361,FGRRES_16146,FGRRES_07284,FGRRES_09796,FGRRES_05315,FGRRES_07218,FGRRES_06992,FGRRES_10016,FGRRES_10048,FGRRES_08568,FGRRES_04983,FGRRES_08531,FGRRES_07419,FGRRES_08537,	1
cytoplasmic region	GO:0099568	5	0.825954	0.871414	27	125	1311	5289	FGRRES_06374,FGRRES_08485,FGRRES_16765,FGRRES_16733,FGRRES_01497,FGRRES_02092,FGRRES_06392_M,FGRRES_01316,FGRRES_07433_M,FGRRES_01188,FGRRES_01923,FGRRES_09982,FGRRES_01410_M,FGRRES_10361,FGRRES_16146,FGRRES_07284,FGRRES_09796,FGRRES_05315,FGRRES_07218,FGRRES_06992,FGRRES_10016,FGRRES_10048,FGRRES_08568,FGRRES_04983,FGRRES_08531,FGRRES_07419,FGRRES_08537,	1
plasma membrane bounded cell projection part	GO:0120038	4	0.828999	0.806865	10	50	1311	5289	FGRRES_00627,FGRRES_06149,FGRRES_16633,FGRRES_01316,FGRRES_01188,FGRRES_10361,FGRRES_05261,FGRRES_05315,FGRRES_10967,FGRRES_10048,	1
cell projection part	GO:0044463	3	0.828999	0.806865	10	50	1311	5289	FGRRES_00627,FGRRES_06149,FGRRES_16633,FGRRES_01316,FGRRES_01188,FGRRES_10361,FGRRES_05261,FGRRES_05315,FGRRES_10967,FGRRES_10048,	1
U2 snRNP	GO:0005686	7	0.831843	0.71194	3	17	1311	5289	FGRRES_04320,FGRRES_07051,FGRRES_01010,	1
trans-Golgi network	GO:0005802	6	0.831843	0.71194	3	17	1311	5289	FGRRES_06743,FGRRES_10145,FGRRES_20264,	1
intrinsic component of mitochondrial membrane	GO:0098573	5	0.832879	0.787185	8	41	1311	5289	FGRRES_09261,FGRRES_06298,FGRRES_09938,FGRRES_00926,FGRRES_02455,FGRRES_01591,FGRRES_08694,FGRRES_05070,	1
site of double-strand break	GO:0035861	6	0.841309	0.756436	6	32	1311	5289	FGRRES_07962,FGRRES_07044_M,FGRRES_00844,FGRRES_01035,FGRRES_01699_M,FGRRES_16705_M,	1
site of DNA damage	GO:0090734	5	0.841309	0.756436	6	32	1311	5289	FGRRES_07962,FGRRES_07044_M,FGRRES_00844,FGRRES_01035,FGRRES_01699_M,FGRRES_16705_M,	1
spindle	GO:0005819	5	0.845108	0.806865	12	60	1311	5289	FGRRES_17310,FGRRES_07947,FGRRES_07962,FGRRES_06165,FGRRES_00270,FGRRES_01035,FGRRES_01870,FGRRES_09795,FGRRES_06631_M,FGRRES_06959,FGRRES_02797,FGRRES_04929,	1
extrinsic component of membrane	GO:0019898	3	0.852483	0.806865	13	65	1311	5289	FGRRES_06277,FGRRES_04104,FGRRES_06392_M,FGRRES_00866,FGRRES_12693,FGRRES_05535,FGRRES_05547,FGRRES_10243,FGRRES_10272,FGRRES_07235,FGRRES_03777,FGRRES_10000,FGRRES_07473,	1
spliceosomal tri-snRNP complex	GO:0097526	7	0.858554	0.701622	4	23	1311	5289	FGRRES_01299,FGRRES_01210,FGRRES_17193,FGRRES_10001,	1
U4/U6 x U5 tri-snRNP complex	GO:0046540	8	0.858554	0.701622	4	23	1311	5289	FGRRES_01299,FGRRES_01210,FGRRES_17193,FGRRES_10001,	1
mating projection tip	GO:0043332	4	0.858731	0.77253	9	47	1311	5289	FGRRES_00627,FGRRES_06149,FGRRES_16633,FGRRES_01316,FGRRES_01188,FGRRES_10361,FGRRES_05261,FGRRES_10967,FGRRES_10048,	1
proton-transporting V-type ATPase complex	GO:0033176	6	0.86073	0.672387	3	18	1311	5289	FGRRES_17670_M,FGRRES_07003,FGRRES_16433_M,	1
eukaryotic translation initiation factor 3 complex, eIF3m	GO:0071541	5	0.864022	0.576332	1	7	1311	5289	FGRRES_01314,	1
RSC complex	GO:0016586	5	0.864022	0.576332	1	7	1311	5289	FGRRES_00570,	1
nucleotide-excision repair factor 3 complex	GO:0000112	5	0.864022	0.576332	1	7	1311	5289	FGRRES_04308,	1
transcriptionally active chromatin	GO:0035327	6	0.864022	0.576332	1	7	1311	5289	FGRRES_06948,	1
CORVET complex	GO:0033263	4	0.864022	0.576332	1	7	1311	5289	FGRRES_11847,	1
tRNA methyltransferase complex	GO:0043527	5	0.864022	0.576332	1	7	1311	5289	FGRRES_05964,	1
nuclear subtelomeric heterochromatin	GO:1990707	8	0.864022	0.576332	1	7	1311	5289	FGRRES_00348,	1
nuclear inner membrane	GO:0005637	5	0.864022	0.576332	1	7	1311	5289	FGRRES_13626_M,	1
U6 snRNP	GO:0005688	7	0.864022	0.576332	1	7	1311	5289	FGRRES_17287_M,	1
subtelomeric heterochromatin	GO:1990421	7	0.864022	0.576332	1	7	1311	5289	FGRRES_00348,	1
Pex17p-Pex14p docking complex	GO:1990415	3	0.864022	0.576332	1	7	1311	5289	FGRRES_09281,	1
signal recognition particle	GO:0048500	5	0.864022	0.576332	1	7	1311	5289	FGRRES_16673,	1
rough endoplasmic reticulum	GO:0005791	6	0.864022	0.576332	1	7	1311	5289	FGRRES_16673,	1
signal recognition particle, endoplasmic reticulum targeting	GO:0005786	6	0.864022	0.576332	1	7	1311	5289	FGRRES_16673,	1
rough endoplasmic reticulum membrane	GO:0030867	4	0.864022	0.576332	1	7	1311	5289	FGRRES_16673,	1
chromosome, centromeric region	GO:0000775	6	0.86571	0.816471	17	84	1311	5289	FGRRES_16767,FGRRES_06137,FGRRES_01347,FGRRES_09025,FGRRES_16980_M,FGRRES_01157,FGRRES_07020,FGRRES_08806,FGRRES_00348,FGRRES_06922,FGRRES_06959,FGRRES_01551,FGRRES_10157,FGRRES_00460,FGRRES_00280_M,FGRRES_02659,FGRRES_08501,	1
nuclear envelope	GO:0005635	5	0.868473	0.835941	23	111	1311	5289	FGRRES_05671,FGRRES_09339,FGRRES_01323,FGRRES_01324,FGRRES_09025,FGRRES_12711,FGRRES_04350,FGRRES_13254_M,FGRRES_00866,FGRRES_02233,FGRRES_09965,FGRRES_01157,FGRRES_00271,FGRRES_05244,FGRRES_06845,FGRRES_09994_M,FGRRES_01854,FGRRES_09796,FGRRES_09408,FGRRES_10157,FGRRES_13626_M,FGRRES_10865,FGRRES_04983,	1
cytosolic large ribosomal subunit	GO:0022625	7	0.870066	0.620665	2	13	1311	5289	FGRRES_10246,FGRRES_09760,	1
nucleosome	GO:0000786	4	0.870066	0.620665	2	13	1311	5289	FGRRES_08856,FGRRES_07553,	1
anaphase-promoting complex	GO:0005680	6	0.870066	0.620665	2	13	1311	5289	FGRRES_00660,FGRRES_10728,	1
cis-Golgi network	GO:0005801	5	0.870066	0.620665	2	13	1311	5289	FGRRES_06856,FGRRES_08873_M,	1
vacuolar part	GO:0044437	5	0.877926	0.842993	28	134	1311	5289	FGRRES_06215,FGRRES_07832,FGRRES_16723,FGRRES_06685_M,FGRRES_16691,FGRRES_04178,FGRRES_04242,FGRRES_09021,FGRRES_09806_M,FGRRES_04370,FGRRES_05621,FGRRES_07070,FGRRES_01150,FGRRES_05547,FGRRES_01006,FGRRES_10243,FGRRES_06542_M,FGRRES_00371,FGRRES_02400,FGRRES_16123_4_M,FGRRES_05001_M,FGRRES_05896,FGRRES_01606,FGRRES_10000,FGRRES_10864,FGRRES_15855_M,FGRRES_05147,FGRRES_07466,	1
replication fork protection complex	GO:0031298	4	0.885163	0.636999	3	19	1311	5289	FGRRES_01007,FGRRES_06874,FGRRES_02622,	1
INO80-type complex	GO:0097346	5	0.885163	0.636999	3	19	1311	5289	FGRRES_06260,FGRRES_02026,FGRRES_00477,	1
U5 snRNP	GO:0005682	7	0.896237	0.576332	2	14	1311	5289	FGRRES_01210,FGRRES_17193,	1
eukaryotic translation initiation factor 3 complex	GO:0005852	4	0.896237	0.576332	2	14	1311	5289	FGRRES_01343,FGRRES_01314,	1
eukaryotic translation initiation factor 3 complex, eIF3e	GO:0071540	5	0.897772	0.504291	1	8	1311	5289	FGRRES_01314,	1
RNA-directed RNA polymerase complex	GO:0031379	5	0.897772	0.504291	1	8	1311	5289	FGRRES_04619,	1
pyruvate dehydrogenase complex	GO:0045254	5	0.897772	0.504291	1	8	1311	5289	FGRRES_05455,	1
mediator complex	GO:0016592	4	0.90026	0.645492	4	25	1311	5289	FGRRES_06573,FGRRES_01279,FGRRES_07388,FGRRES_10148,	1
replication compartment	GO:0046809	6	0.90026	0.645492	4	25	1311	5289	FGRRES_01300,FGRRES_06922,FGRRES_05187_M,FGRRES_02622,	1
host cell	GO:0043657	4	0.90026	0.645492	4	25	1311	5289	FGRRES_01300,FGRRES_06922,FGRRES_05187_M,FGRRES_02622,	1
intracellular region of host	GO:0043656	4	0.90026	0.645492	4	25	1311	5289	FGRRES_01300,FGRRES_06922,FGRRES_05187_M,FGRRES_02622,	1
host	GO:0018995	3	0.90026	0.645492	4	25	1311	5289	FGRRES_01300,FGRRES_06922,FGRRES_05187_M,FGRRES_02622,	1
host intracellular membrane-bounded organelle	GO:0033648	6	0.90026	0.645492	4	25	1311	5289	FGRRES_01300,FGRRES_06922,FGRRES_05187_M,FGRRES_02622,	1
host cell part	GO:0033643	3	0.90026	0.645492	4	25	1311	5289	FGRRES_01300,FGRRES_06922,FGRRES_05187_M,FGRRES_02622,	1
host intracellular part	GO:0033646	4	0.90026	0.645492	4	25	1311	5289	FGRRES_01300,FGRRES_06922,FGRRES_05187_M,FGRRES_02622,	1
host intracellular organelle	GO:0033647	5	0.90026	0.645492	4	25	1311	5289	FGRRES_01300,FGRRES_06922,FGRRES_05187_M,FGRRES_02622,	1
respiratory chain complex	GO:0098803	5	0.90026	0.645492	4	25	1311	5289	FGRRES_13137,FGRRES_09341,FGRRES_01196,FGRRES_01981,	1
other organism cell	GO:0044216	3	0.90026	0.645492	4	25	1311	5289	FGRRES_01300,FGRRES_06922,FGRRES_05187_M,FGRRES_02622,	1
other organism part	GO:0044217	2	0.90026	0.645492	4	25	1311	5289	FGRRES_01300,FGRRES_06922,FGRRES_05187_M,FGRRES_02622,	1
host cell nucleus	GO:0042025	7	0.90026	0.645492	4	25	1311	5289	FGRRES_01300,FGRRES_06922,FGRRES_05187_M,FGRRES_02622,	1
other organism	GO:0044215	2	0.90026	0.645492	4	25	1311	5289	FGRRES_01300,FGRRES_06922,FGRRES_05187_M,FGRRES_02622,	1
viral factory	GO:0039713	4	0.90026	0.645492	4	25	1311	5289	FGRRES_01300,FGRRES_06922,FGRRES_05187_M,FGRRES_02622,	1
nuclear viral factory	GO:0039715	5	0.90026	0.645492	4	25	1311	5289	FGRRES_01300,FGRRES_06922,FGRRES_05187_M,FGRRES_02622,	1
organelle subcompartment	GO:0031984	4	0.917094	0.861081	54	253	1311	5289	FGRRES_06375,FGRRES_06370,FGRRES_00688,FGRRES_16726,FGRRES_11847,FGRRES_16739,FGRRES_16733,FGRRES_06685_M,FGRRES_04102,FGRRES_16673,FGRRES_02016,FGRRES_20078,FGRRES_17207,FGRRES_04278,FGRRES_08314,FGRRES_05775,FGRRES_04412,FGRRES_06391_M,FGRRES_07154,FGRRES_09863,FGRRES_04393,FGRRES_02232,FGRRES_09830_M,FGRRES_06688,FGRRES_09197,FGRRES_16825,FGRRES_17252_M,FGRRES_09635,FGRRES_06743,FGRRES_02522,F…	1
transcription elongation factor complex	GO:0008023	4	0.917428	0.53791	2	15	1311	5289	FGRRES_00303,FGRRES_06948,	1
nuclear pre-replicative complex	GO:0005656	5	0.917428	0.53791	2	15	1311	5289	FGRRES_05465,FGRRES_02622,	1
pre-replicative complex	GO:0036387	4	0.917428	0.53791	2	15	1311	5289	FGRRES_05465,FGRRES_02622,	1
Golgi apparatus	GO:0005794	5	0.920538	0.863435	58	271	1311	5289	FGRRES_00688,FGRRES_08492,FGRRES_07832,FGRRES_16726,FGRRES_09297,FGRRES_11847,FGRRES_16739,FGRRES_07930,FGRRES_07929,FGRRES_02022,FGRRES_02820,FGRRES_05809,FGRRES_06139,FGRRES_17207,FGRRES_12852,FGRRES_04278,FGRRES_05780,FGRRES_04412,FGRRES_06391_M,FGRRES_09806_M,FGRRES_09851,FGRRES_04393,FGRRES_17639_M,FGRRES_09928,FGRRES_02232,FGRRES_10418,FGRRES_07076,FGRRES_17252_M,FGRRES_15762,FGRRES_00979,F…	1
contractile ring	GO:0070938	3	0.922842	0.576332	3	21	1311	5289	FGRRES_01497,FGRRES_07284,FGRRES_08568,	1
actomyosin contractile ring	GO:0005826	4	0.922842	0.576332	3	21	1311	5289	FGRRES_01497,FGRRES_07284,FGRRES_08568,	1
histone methyltransferase complex	GO:0035097	5	0.92315	0.448258	1	9	1311	5289	FGRRES_16832,	1
NMS complex	GO:0031617	4	0.92315	0.448258	1	9	1311	5289	FGRRES_08501,	1
extrinsic component of vacuolar membrane	GO:0000306	5	0.92315	0.448258	1	9	1311	5289	FGRRES_05547,	1
intrinsic component of peroxisomal membrane	GO:0031231	5	0.92315	0.448258	1	9	1311	5289	FGRRES_09281,	1
respiratory chain complex III	GO:0045275	4	0.92315	0.448258	1	9	1311	5289	FGRRES_01196,	1
Swr1 complex	GO:0000812	6	0.92315	0.448258	1	9	1311	5289	FGRRES_06260,	1
mitochondrial respiratory chain complex III	GO:0005750	5	0.92315	0.448258	1	9	1311	5289	FGRRES_01196,	1
trans-Golgi network transport vesicle membrane	GO:0012510	7	0.92315	0.448258	1	9	1311	5289	FGRRES_15855_M,	1
integral component of peroxisomal membrane	GO:0005779	6	0.92315	0.448258	1	9	1311	5289	FGRRES_09281,	1
replication fork	GO:0005657	5	0.924358	0.759402	16	85	1311	5289	FGRRES_06260,FGRRES_08405,FGRRES_06137,FGRRES_05453_M,FGRRES_06032,FGRRES_12711,FGRRES_05498,FGRRES_01052,FGRRES_06721,FGRRES_01035,FGRRES_01007,FGRRES_05274,FGRRES_06874,FGRRES_00329,FGRRES_02752,FGRRES_02622,	1
microtubule	GO:0005874	6	0.926604	0.698249	9	52	1311	5289	FGRRES_02054,FGRRES_06149,FGRRES_05450,FGRRES_16784,FGRRES_13685,FGRRES_09994_M,FGRRES_06959,FGRRES_16336,FGRRES_01690,	1
nuclear DNA-directed RNA polymerase complex	GO:0055029	6	0.927346	0.743165	14	76	1311	5289	FGRRES_05853,FGRRES_04308,FGRRES_04273,FGRRES_04291,FGRRES_06683,FGRRES_09978,FGRRES_04470,FGRRES_05550,FGRRES_00365,FGRRES_06937,FGRRES_06948,FGRRES_16512,FGRRES_02659,FGRRES_07423,	1
SLIK (SAGA-like) complex	GO:0046695	7	0.934497	0.504291	2	16	1311	5289	FGRRES_06089,FGRRES_00280_M,	1
integral component of mitochondrial outer membrane	GO:0031307	7	0.934497	0.504291	2	16	1311	5289	FGRRES_00926,FGRRES_08694,	1
intrinsic component of mitochondrial outer membrane	GO:0031306	6	0.934497	0.504291	2	16	1311	5289	FGRRES_00926,FGRRES_08694,	1
outer mitochondrial membrane protein complex	GO:0098799	4	0.934497	0.504291	2	16	1311	5289	FGRRES_13127,FGRRES_02455,	1
DNA-directed RNA polymerase complex	GO:0000428	5	0.935405	0.733514	14	77	1311	5289	FGRRES_05853,FGRRES_04308,FGRRES_04273,FGRRES_04291,FGRRES_06683,FGRRES_09978,FGRRES_04470,FGRRES_05550,FGRRES_00365,FGRRES_06937,FGRRES_06948,FGRRES_16512,FGRRES_02659,FGRRES_07423,	1
transferase complex	GO:1990234	4	0.938601	0.866193	73	340	1311	5289	FGRRES_06376,FGRRES_00688,FGRRES_00660,FGRRES_10728,FGRRES_06282,FGRRES_16739,FGRRES_04102,FGRRES_01438,FGRRES_00621,FGRRES_05853,FGRRES_07946,FGRRES_10606,FGRRES_17207,FGRRES_04309,FGRRES_04308,FGRRES_11782,FGRRES_16586,FGRRES_04273,FGRRES_04278,FGRRES_04291,FGRRES_17112,FGRRES_06032,FGRRES_05516,FGRRES_07623,FGRRES_04412,FGRRES_15847,FGRRES_06089,FGRRES_05455,FGRRES_17004,FGRRES_02237,FGRRES_08…	1
proton-transporting V-type ATPase, V1 domain	GO:0033180	6	0.942231	0.403432	1	10	1311	5289	FGRRES_07003,	1
spindle midzone	GO:0051233	5	0.942231	0.403432	1	10	1311	5289	FGRRES_06959,	1
trans-Golgi network transport vesicle	GO:0030140	7	0.942231	0.403432	1	10	1311	5289	FGRRES_15855_M,	1
ubiquitin ligase complex	GO:0000151	4	0.944576	0.672387	9	54	1311	5289	FGRRES_00660,FGRRES_10728,FGRRES_05455,FGRRES_02237,FGRRES_11967,FGRRES_10272,FGRRES_00303,FGRRES_06922,FGRRES_05134,	1
eukaryotic 43S preinitiation complex	GO:0016282	6	0.948185	0.474626	2	17	1311	5289	FGRRES_01343,FGRRES_01314,	1
H4 histone acetyltransferase complex	GO:1902562	6	0.948185	0.474626	2	17	1311	5289	FGRRES_06089,FGRRES_00280_M,	1
proton-transporting two-sector ATPase complex, proton-transporting domain	GO:0033177	5	0.948185	0.474626	2	17	1311	5289	FGRRES_17670_M,FGRRES_16433_M,	1
nuclear replication fork	GO:0043596	6	0.952177	0.672387	10	60	1311	5289	FGRRES_06137,FGRRES_05453_M,FGRRES_06032,FGRRES_05498,FGRRES_01052,FGRRES_01007,FGRRES_05274,FGRRES_06874,FGRRES_00329,FGRRES_02622,	1
endoplasmic reticulum subcompartment	GO:0098827	5	0.952247	0.802407	36	181	1311	5289	FGRRES_06375,FGRRES_06370,FGRRES_00688,FGRRES_11847,FGRRES_16739,FGRRES_16733,FGRRES_06685_M,FGRRES_04102,FGRRES_16673,FGRRES_02016,FGRRES_20078,FGRRES_08314,FGRRES_05775,FGRRES_07154,FGRRES_09863,FGRRES_02232,FGRRES_09830_M,FGRRES_06688,FGRRES_09197,FGRRES_16825,FGRRES_09635,FGRRES_02522,FGRRES_08830,FGRRES_09782,FGRRES_09796,FGRRES_15729_M,FGRRES_08706,FGRRES_10152,FGRRES_16515,FGRRES_01606,FGR…	1
NuA4 histone acetyltransferase complex	GO:0035267	8	0.956578	0.366757	1	11	1311	5289	FGRRES_06089,	1
ESCRT complex	GO:0036452	4	0.956578	0.366757	1	11	1311	5289	FGRRES_08492,	1
microbody part	GO:0044438	5	0.958567	0.504291	3	24	1311	5289	FGRRES_09281,FGRRES_09503_M,FGRRES_00407,	1
peroxisomal part	GO:0044439	6	0.958567	0.504291	3	24	1311	5289	FGRRES_09281,FGRRES_09503_M,FGRRES_00407,	1
cytoplasmic stress granule	GO:0010494	7	0.958567	0.504291	3	24	1311	5289	FGRRES_05737_M,FGRRES_08421_M,FGRRES_00286,	1
DNA packaging complex	GO:0044815	3	0.959116	0.448258	2	18	1311	5289	FGRRES_08856,FGRRES_07553,	1
pre-autophagosomal structure	GO:0000407	5	0.959116	0.448258	2	18	1311	5289	FGRRES_05547,FGRRES_13550,	1
eukaryotic 48S preinitiation complex	GO:0033290	6	0.959116	0.448258	2	18	1311	5289	FGRRES_01343,FGRRES_01314,	1
transcription factor complex	GO:0005667	4	0.963655	0.761726	27	143	1311	5289	FGRRES_16912_M,FGRRES_09279,FGRRES_05853,FGRRES_04308,FGRRES_01313,FGRRES_02939,FGRRES_13146,FGRRES_05498,FGRRES_06664,FGRRES_07086,FGRRES_09978,FGRRES_07076,FGRRES_03281,FGRRES_15782,FGRRES_07310,FGRRES_01877,FGRRES_03040,FGRRES_06631_M,FGRRES_08722,FGRRES_01555,FGRRES_10179,FGRRES_13838,FGRRES_05930,FGRRES_10868,FGRRES_00570,FGRRES_08516,FGRRES_07423,	1
extracellular region	GO:0005576	2	0.965813	0.695573	15	87	1311	5289	FGRRES_11032,FGRRES_13246,FGRRES_04230,FGRRES_10670,FGRRES_03457,FGRRES_03379,FGRRES_03309,FGRRES_03311,FGRRES_03194,FGRRES_02744,FGRRES_13834,FGRRES_12483_M,FGRRES_02342_M,FGRRES_03795,FGRRES_02658,	1
RNA polymerase complex	GO:0030880	4	0.965813	0.695573	15	87	1311	5289	FGRRES_05853,FGRRES_04308,FGRRES_04273,FGRRES_04291,FGRRES_06683,FGRRES_09978,FGRRES_04470,FGRRES_05550,FGRRES_04619,FGRRES_00365,FGRRES_06937,FGRRES_06948,FGRRES_16512,FGRRES_02659,FGRRES_07423,	1
intracellular organelle part	GO:0044446	3	0.966002	0.942896	445	1904	1311	5289	FGRRES_13127,FGRRES_10757,FGRRES_06364,FGRRES_13137,FGRRES_00695,FGRRES_06375,FGRRES_06374,FGRRES_06372,FGRRES_06370,FGRRES_00688,FGRRES_06340,FGRRES_08492,FGRRES_05733,FGRRES_06215,FGRRES_06353,FGRRES_08485,FGRRES_09261,FGRRES_00660,FGRRES_06298,FGRRES_10728,FGRRES_00654,FGRRES_06282,FGRRES_09281,FGRRES_06272,FGRRES_07832,FGRRES_06260,FGRRES_17310,FGRRES_16726,FGRRES_16723,FGRRES_11847,FGRRES_06…	1
H4/H2A histone acetyltransferase complex	GO:0043189	7	0.967363	0.336194	1	12	1311	5289	FGRRES_06089,	1
SWI/SNF superfamily-type complex	GO:0070603	4	0.967815	0.520558	4	31	1311	5289	FGRRES_06260,FGRRES_02026,FGRRES_00477,FGRRES_00570,	1
SAGA-type complex	GO:0070461	6	0.967817	0.424666	2	19	1311	5289	FGRRES_06089,FGRRES_00280_M,	1
SAGA complex	GO:0000124	7	0.967817	0.424666	2	19	1311	5289	FGRRES_06089,FGRRES_00280_M,	1
DNA replication preinitiation complex	GO:0031261	4	0.967817	0.424666	2	19	1311	5289	FGRRES_01007,FGRRES_02622,	1
supramolecular polymer	GO:0099081	3	0.969303	0.626016	9	58	1311	5289	FGRRES_02054,FGRRES_06149,FGRRES_05450,FGRRES_16784,FGRRES_13685,FGRRES_09994_M,FGRRES_06959,FGRRES_16336,FGRRES_01690,	1
supramolecular complex	GO:0099080	2	0.969303	0.626016	9	58	1311	5289	FGRRES_02054,FGRRES_06149,FGRRES_05450,FGRRES_16784,FGRRES_13685,FGRRES_09994_M,FGRRES_06959,FGRRES_16336,FGRRES_01690,	1
polymeric cytoskeletal fiber	GO:0099513	5	0.969303	0.626016	9	58	1311	5289	FGRRES_02054,FGRRES_06149,FGRRES_05450,FGRRES_16784,FGRRES_13685,FGRRES_09994_M,FGRRES_06959,FGRRES_16336,FGRRES_01690,	1
supramolecular fiber	GO:0099512	4	0.969303	0.626016	9	58	1311	5289	FGRRES_02054,FGRRES_06149,FGRRES_05450,FGRRES_16784,FGRRES_13685,FGRRES_09994_M,FGRRES_06959,FGRRES_16336,FGRRES_01690,	1
organelle part	GO:0044422	2	0.970643	0.94092	445	1908	1311	5289	FGRRES_13127,FGRRES_10757,FGRRES_06364,FGRRES_13137,FGRRES_00695,FGRRES_06375,FGRRES_06374,FGRRES_06372,FGRRES_06370,FGRRES_00688,FGRRES_06340,FGRRES_08492,FGRRES_05733,FGRRES_06215,FGRRES_06353,FGRRES_08485,FGRRES_09261,FGRRES_00660,FGRRES_06298,FGRRES_10728,FGRRES_00654,FGRRES_06282,FGRRES_09281,FGRRES_06272,FGRRES_07832,FGRRES_06260,FGRRES_17310,FGRRES_16726,FGRRES_16723,FGRRES_11847,FGRRES_06…	1
Golgi apparatus part	GO:0044431	5	0.972238	0.743918	26	141	1311	5289	FGRRES_00688,FGRRES_16726,FGRRES_16739,FGRRES_07930,FGRRES_02022,FGRRES_17207,FGRRES_04278,FGRRES_04412,FGRRES_06391_M,FGRRES_09851,FGRRES_04393,FGRRES_17252_M,FGRRES_15762,FGRRES_06743,FGRRES_06856,FGRRES_06542_M,FGRRES_08873_M,FGRRES_10145,FGRRES_02714,FGRRES_20264,FGRRES_05082,FGRRES_00538,FGRRES_10091,FGRRES_13014,FGRRES_15855_M,FGRRES_09591,	1
nucleoplasm	GO:0005654	5	0.973669	0.792457	44	224	1311	5289	FGRRES_00695,FGRRES_11865,FGRRES_10795,FGRRES_05853,FGRRES_04308,FGRRES_01386,FGRRES_04273,FGRRES_00892,FGRRES_16007,FGRRES_06573,FGRRES_01968,FGRRES_05498,FGRRES_01279,FGRRES_07107,FGRRES_06089,FGRRES_05465,FGRRES_15738_M,FGRRES_06683,FGRRES_09978,FGRRES_16832,FGRRES_06705,FGRRES_01105,FGRRES_00297,FGRRES_05244,FGRRES_07388,FGRRES_01007,FGRRES_06821,FGRRES_07310,FGRRES_00399,FGRRES_00365,FGRRES_…	1
translation preinitiation complex	GO:0070993	5	0.974719	0.403432	2	20	1311	5289	FGRRES_01343,FGRRES_01314,	1
methyltransferase complex	GO:0034708	4	0.974719	0.403432	2	20	1311	5289	FGRRES_16832,FGRRES_05964,	1
nuclear exosome (RNase complex)	GO:0000176	5	0.975471	0.310333	1	13	1311	5289	FGRRES_06049,	1
cytoplasmic microtubule	GO:0005881	7	0.975471	0.310333	1	13	1311	5289	FGRRES_02054,	1
endoplasmic reticulum membrane	GO:0005789	3	0.976243	0.760758	33	175	1311	5289	FGRRES_06375,FGRRES_06370,FGRRES_00688,FGRRES_11847,FGRRES_16739,FGRRES_06685_M,FGRRES_04102,FGRRES_16673,FGRRES_02016,FGRRES_20078,FGRRES_08314,FGRRES_05775,FGRRES_07154,FGRRES_09863,FGRRES_02232,FGRRES_09830_M,FGRRES_06688,FGRRES_09197,FGRRES_16825,FGRRES_09635,FGRRES_02522,FGRRES_08830,FGRRES_09782,FGRRES_09796,FGRRES_15729_M,FGRRES_08706,FGRRES_10152,FGRRES_16515,FGRRES_01606,FGRRES_00538,FGR…	1
clathrin-coated vesicle membrane	GO:0030665	7	0.981566	0.288166	1	14	1311	5289	FGRRES_15855_M,	1
nuclear replisome	GO:0043601	5	0.981566	0.288166	1	14	1311	5289	FGRRES_06032,	1
transcription factor TFIID complex	GO:0005669	6	0.981566	0.288166	1	14	1311	5289	FGRRES_05853,	1
replisome	GO:0030894	4	0.981566	0.288166	1	14	1311	5289	FGRRES_06032,	1
endomembrane system	GO:0012505	3	0.984116	0.876554	161	741	1311	5289	FGRRES_06375,FGRRES_06370,FGRRES_00688,FGRRES_08492,FGRRES_06215,FGRRES_09281,FGRRES_07180_M,FGRRES_07832,FGRRES_16726,FGRRES_09297,FGRRES_11847,FGRRES_08623_M,FGRRES_16739,FGRRES_16733,FGRRES_06685_M,FGRRES_16691,FGRRES_04102,FGRRES_16686,FGRRES_16673,FGRRES_07930,FGRRES_07929,FGRRES_02022,FGRRES_02016,FGRRES_01408,FGRRES_05671,FGRRES_20078,FGRRES_02820,FGRRES_06107,FGRRES_17670_M,FGRRES_09339,F…	1
microbody	GO:0042579	5	0.984183	0.526216	6	46	1311	5289	FGRRES_09281,FGRRES_01419,FGRRES_09896,FGRRES_09503_M,FGRRES_13617,FGRRES_00407,	1
peroxisome	GO:0005777	6	0.984183	0.526216	6	46	1311	5289	FGRRES_09281,FGRRES_01419,FGRRES_09896,FGRRES_09503_M,FGRRES_13617,FGRRES_00407,	1
cytosolic ribosome	GO:0022626	6	0.986048	0.491991	5	41	1311	5289	FGRRES_06353,FGRRES_07101,FGRRES_10246,FGRRES_09760,FGRRES_09544,	1
organellar large ribosomal subunit	GO:0000315	7	0.986063	0.417344	3	29	1311	5289	FGRRES_06755_M,FGRRES_09002,FGRRES_10355,	1
COPII-coated ER to Golgi transport vesicle	GO:0030134	7	0.986063	0.417344	3	29	1311	5289	FGRRES_02022,FGRRES_06391_M,FGRRES_00538,	1
transport vesicle	GO:0030133	6	0.986063	0.417344	3	29	1311	5289	FGRRES_04237,FGRRES_15855_M,FGRRES_08936,	1
mitochondrial large ribosomal subunit	GO:0005762	8	0.986063	0.417344	3	29	1311	5289	FGRRES_06755_M,FGRRES_09002,FGRRES_10355,	1
DNA-directed RNA polymerase II, holoenzyme	GO:0016591	6	0.986826	0.556459	8	58	1311	5289	FGRRES_05853,FGRRES_04308,FGRRES_04273,FGRRES_06683,FGRRES_09978,FGRRES_06948,FGRRES_02659,FGRRES_07423,	1
endoplasmic reticulum part	GO:0044432	5	0.987463	0.74635	37	200	1311	5289	FGRRES_06375,FGRRES_06370,FGRRES_00688,FGRRES_11847,FGRRES_16739,FGRRES_16733,FGRRES_06685_M,FGRRES_04102,FGRRES_16673,FGRRES_02016,FGRRES_20078,FGRRES_08314,FGRRES_05775,FGRRES_07154,FGRRES_09863,FGRRES_02232,FGRRES_09830_M,FGRRES_06688,FGRRES_09197,FGRRES_16825,FGRRES_09635,FGRRES_02522,FGRRES_08830,FGRRES_09782,FGRRES_09796,FGRRES_15729_M,FGRRES_08706,FGRRES_10152,FGRRES_16515,FGRRES_05974,FGR…	1
tethering complex	GO:0099023	3	0.988355	0.448258	4	36	1311	5289	FGRRES_11847,FGRRES_07930,FGRRES_09851,FGRRES_16123_4_M,	1
extrinsic component of mitochondrial inner membrane	GO:0031314	5	0.989591	0.252145	1	16	1311	5289	FGRRES_12693,	1
proteasome core complex	GO:0005839	4	0.989591	0.252145	1	16	1311	5289	FGRRES_16733,	1
catalytic complex	GO:1902494	3	0.990562	0.847547	125	595	1311	5289	FGRRES_13137,FGRRES_06372,FGRRES_06376,FGRRES_00688,FGRRES_05733,FGRRES_00660,FGRRES_10728,FGRRES_06282,FGRRES_06260,FGRRES_06127_M,FGRRES_17337,FGRRES_16739,FGRRES_16733,FGRRES_04104,FGRRES_04102,FGRRES_01490,FGRRES_01438,FGRRES_00621,FGRRES_02029,FGRRES_02026,FGRRES_05853,FGRRES_09341,FGRRES_07946,FGRRES_10606,FGRRES_17207,FGRRES_04309,FGRRES_04308,FGRRES_11782,FGRRES_16586,FGRRES_15910,FGRRES_…	1
exoribonuclease complex	GO:1905354	4	0.992179	0.237313	1	17	1311	5289	FGRRES_06049,	1
proton-transporting two-sector ATPase complex, catalytic domain	GO:0033178	5	0.992179	0.237313	1	17	1311	5289	FGRRES_07003,	1
exosome (RNase complex)	GO:0000178	4	0.992179	0.237313	1	17	1311	5289	FGRRES_06049,	1
cytochrome complex	GO:0070069	4	0.992179	0.237313	1	17	1311	5289	FGRRES_01196,	1
mitochondrial respiratory chain	GO:0005746	4	0.992179	0.237313	1	17	1311	5289	FGRRES_01196,	1
condensed chromosome kinetochore	GO:0000777	6	0.992361	0.424666	4	38	1311	5289	FGRRES_01347,FGRRES_16980_M,FGRRES_06959,FGRRES_08501,	1
large ribosomal subunit	GO:0015934	6	0.992513	0.484119	6	50	1311	5289	FGRRES_06755_M,FGRRES_09002,FGRRES_01128,FGRRES_10355,FGRRES_10246,FGRRES_09760,	1
cytosolic small ribosomal subunit	GO:0022627	7	0.994124	0.224129	1	18	1311	5289	FGRRES_06353,	1
clathrin-coated vesicle	GO:0030136	7	0.994124	0.224129	1	18	1311	5289	FGRRES_15855_M,	1
phosphatase complex	GO:1903293	4	0.994271	0.310333	2	26	1311	5289	FGRRES_00852,FGRRES_04026,	1
protein serine/threonine phosphatase complex	GO:0008287	3	0.994271	0.310333	2	26	1311	5289	FGRRES_00852,FGRRES_04026,	1
mitochondrial matrix	GO:0005759	6	0.994703	0.640369	20	126	1311	5289	FGRRES_05733,FGRRES_00654,FGRRES_06282,FGRRES_05696,FGRRES_04309,FGRRES_06755_M,FGRRES_05516,FGRRES_09002,FGRRES_01254,FGRRES_01141,FGRRES_10355,FGRRES_02784_M,FGRRES_02543,FGRRES_07299,FGRRES_07257,FGRRES_10118,FGRRES_01573,FGRRES_00568,FGRRES_10887,FGRRES_09580,	1
protein-DNA complex	GO:0032993	3	0.994907	0.465499	6	52	1311	5289	FGRRES_06032,FGRRES_05465,FGRRES_01007,FGRRES_08856,FGRRES_07553,FGRRES_02622,	1
proton-transporting two-sector ATPase complex	GO:0016469	5	0.995544	0.35597	3	34	1311	5289	FGRRES_17670_M,FGRRES_07003,FGRRES_16433_M,	1
microbody membrane	GO:0031903	6	0.995585	0.212333	1	19	1311	5289	FGRRES_09281,	1
peroxisomal membrane	GO:0005778	7	0.995585	0.212333	1	19	1311	5289	FGRRES_09281,	1
nuclear outer membrane-endoplasmic reticulum membrane network	GO:0042175	3	0.995617	0.69703	33	191	1311	5289	FGRRES_06375,FGRRES_06370,FGRRES_00688,FGRRES_11847,FGRRES_16739,FGRRES_06685_M,FGRRES_04102,FGRRES_16673,FGRRES_02016,FGRRES_20078,FGRRES_08314,FGRRES_05775,FGRRES_07154,FGRRES_09863,FGRRES_02232,FGRRES_09830_M,FGRRES_06688,FGRRES_09197,FGRRES_16825,FGRRES_09635,FGRRES_02522,FGRRES_08830,FGRRES_09782,FGRRES_09796,FGRRES_15729_M,FGRRES_08706,FGRRES_10152,FGRRES_16515,FGRRES_01606,FGRRES_00538,FGR…	1
whole membrane	GO:0098805	3	0.995763	0.739113	48	262	1311	5289	FGRRES_13127,FGRRES_06370,FGRRES_06215,FGRRES_09281,FGRRES_07832,FGRRES_16723,FGRRES_06685_M,FGRRES_16691,FGRRES_04178,FGRRES_02022,FGRRES_02092,FGRRES_12821,FGRRES_01395,FGRRES_04242,FGRRES_09021,FGRRES_09806_M,FGRRES_04370,FGRRES_09928,FGRRES_09927,FGRRES_05621,FGRRES_07070,FGRRES_01410_M,FGRRES_01150,FGRRES_00903,FGRRES_00926,FGRRES_05547,FGRRES_01006,FGRRES_10243,FGRRES_10272,FGRRES_06542_M,F…	1
kinetochore	GO:0000776	5	0.995806	0.429184	5	47	1311	5289	FGRRES_01347,FGRRES_16980_M,FGRRES_08806,FGRRES_06959,FGRRES_08501,	1
condensed chromosome, centromeric region	GO:0000779	7	0.995996	0.393593	4	41	1311	5289	FGRRES_01347,FGRRES_16980_M,FGRRES_06959,FGRRES_08501,	1
condensed nuclear chromosome kinetochore	GO:0000778	7	0.997207	0.336194	3	36	1311	5289	FGRRES_01347,FGRRES_06959,FGRRES_08501,	1
acetyltransferase complex	GO:1902493	5	0.997419	0.375286	4	43	1311	5289	FGRRES_06376,FGRRES_06089,FGRRES_08691,FGRRES_00280_M,	1
protein acetyltransferase complex	GO:0031248	4	0.997419	0.375286	4	43	1311	5289	FGRRES_06376,FGRRES_06089,FGRRES_08691,FGRRES_00280_M,	1
transport vesicle membrane	GO:0030658	6	0.997509	0.192111	1	21	1311	5289	FGRRES_15855_M,	1
nucleotide-excision repair complex	GO:0000109	4	0.997509	0.192111	1	21	1311	5289	FGRRES_04308,	1
ribonucleoprotein granule	GO:0035770	5	0.997794	0.327107	3	37	1311	5289	FGRRES_05737_M,FGRRES_08421_M,FGRRES_00286,	1
cytoplasmic ribonucleoprotein granule	GO:0036464	6	0.997794	0.327107	3	37	1311	5289	FGRRES_05737_M,FGRRES_08421_M,FGRRES_00286,	1
mitochondrial protein complex	GO:0098798	4	0.997897	0.490661	9	74	1311	5289	FGRRES_13127,FGRRES_05733,FGRRES_04309,FGRRES_01189,FGRRES_01196,FGRRES_00861,FGRRES_02455,FGRRES_05543_M,FGRRES_09580,	1
RNA polymerase II transcription factor complex	GO:0090575	6	0.997932	0.366757	4	44	1311	5289	FGRRES_05853,FGRRES_04308,FGRRES_09978,FGRRES_07423,	1
extrinsic component of organelle membrane	GO:0031312	4	0.998396	0.260279	2	31	1311	5289	FGRRES_12693,FGRRES_05547,	1
nuclear transcription factor complex	GO:0044798	5	0.99853	0.387916	5	52	1311	5289	FGRRES_05853,FGRRES_04308,FGRRES_07086,FGRRES_09978,FGRRES_07423,	1
P-body	GO:0000932	7	0.998595	0.175405	1	23	1311	5289	FGRRES_05737_M,	1
spindle microtubule	GO:0005876	7	0.998595	0.175405	1	23	1311	5289	FGRRES_06959,	1
condensed nuclear chromosome, centromeric region	GO:0000780	8	0.998629	0.310333	3	39	1311	5289	FGRRES_01347,FGRRES_06959,FGRRES_08501,	1
intracellular membrane-bounded organelle	GO:0043231	4	0.998744	0.947322	808	3441	1311	5289	FGRRES_13127,FGRRES_05749,FGRRES_10757,FGRRES_06364,FGRRES_13137,FGRRES_00695,FGRRES_06369,FGRRES_06375,FGRRES_06374,FGRRES_06372,FGRRES_06243,FGRRES_06376,FGRRES_06370,FGRRES_00688,FGRRES_06340,FGRRES_08498,FGRRES_13110,FGRRES_08492,FGRRES_05733,FGRRES_06215,FGRRES_02881_M,FGRRES_09261,FGRRES_00660,FGRRES_06297,FGRRES_06298,FGRRES_10728,FGRRES_06168_M,FGRRES_00654,FGRRES_06282,FGRRES_17351,FGRRE…	1
endosome membrane	GO:0010008	7	0.99876	0.252145	2	32	1311	5289	FGRRES_10272,FGRRES_06542_M,	1
Golgi-associated vesicle	GO:0005798	6	0.998813	0.380597	5	53	1311	5289	FGRRES_02022,FGRRES_06391_M,FGRRES_15762,FGRRES_00538,FGRRES_15855_M,	1
chromosome	GO:0005694	5	0.999003	0.744301	69	374	1311	5289	FGRRES_06260,FGRRES_17310,FGRRES_16767,FGRRES_01457,FGRRES_02026,FGRRES_08405,FGRRES_05853,FGRRES_05857,FGRRES_00799,FGRRES_00794,FGRRES_06137,FGRRES_07962,FGRRES_13318_M,FGRRES_05453_M,FGRRES_01347,FGRRES_07044_M,FGRRES_01300,FGRRES_09025,FGRRES_00892,FGRRES_06032,FGRRES_04424,FGRRES_12711,FGRRES_16980_M,FGRRES_05498,FGRRES_15847,FGRRES_05465,FGRRES_00844,FGRRES_01052,FGRRES_16832,FGRRES_06721,F…	1
bounding membrane of organelle	GO:0098588	4	0.999079	0.720867	57	319	1311	5289	FGRRES_13127,FGRRES_06370,FGRRES_00688,FGRRES_06215,FGRRES_09281,FGRRES_07832,FGRRES_16726,FGRRES_16723,FGRRES_16739,FGRRES_06685_M,FGRRES_16691,FGRRES_16673,FGRRES_04178,FGRRES_12821,FGRRES_17207,FGRRES_01395,FGRRES_04242,FGRRES_04278,FGRRES_09021,FGRRES_04412,FGRRES_06391_M,FGRRES_09806_M,FGRRES_04393,FGRRES_04370,FGRRES_09927,FGRRES_05621,FGRRES_07070,FGRRES_01150,FGRRES_00903,FGRRES_00926,FGR…	1
endosomal part	GO:0044440	6	0.99916	0.336194	4	48	1311	5289	FGRRES_08492,FGRRES_11847,FGRRES_10272,FGRRES_06542_M,	1
nucleoplasm part	GO:0044451	5	0.999181	0.645492	32	200	1311	5289	FGRRES_11865,FGRRES_10795,FGRRES_05853,FGRRES_04308,FGRRES_04273,FGRRES_00892,FGRRES_16007,FGRRES_06573,FGRRES_05498,FGRRES_01279,FGRRES_06089,FGRRES_05465,FGRRES_15738_M,FGRRES_06683,FGRRES_09978,FGRRES_16832,FGRRES_00297,FGRRES_07388,FGRRES_01007,FGRRES_00399,FGRRES_00365,FGRRES_00303,FGRRES_06937,FGRRES_06948,FGRRES_10148,FGRRES_00460,FGRRES_02622,FGRRES_00280_M,FGRRES_02659,FGRRES_04998,FGRRE…	1
proteasome complex	GO:0000502	4	0.99923	0.366757	5	55	1311	5289	FGRRES_16733,FGRRES_02029,FGRRES_04288,FGRRES_10157,FGRRES_04979,	1
chromosomal part	GO:0044427	4	0.999297	0.730449	65	359	1311	5289	FGRRES_06260,FGRRES_17310,FGRRES_16767,FGRRES_01457,FGRRES_02026,FGRRES_08405,FGRRES_05853,FGRRES_05857,FGRRES_00799,FGRRES_00794,FGRRES_06137,FGRRES_07962,FGRRES_05453_M,FGRRES_01347,FGRRES_07044_M,FGRRES_01300,FGRRES_09025,FGRRES_00892,FGRRES_06032,FGRRES_04424,FGRRES_12711,FGRRES_16980_M,FGRRES_05498,FGRRES_15847,FGRRES_05465,FGRRES_00844,FGRRES_01052,FGRRES_06721,FGRRES_01157,FGRRES_07020,FGR…	1
mitochondrion	GO:0005739	5	0.999321	0.801892	129	649	1311	5289	FGRRES_13127,FGRRES_05749,FGRRES_13137,FGRRES_06370,FGRRES_13110,FGRRES_05733,FGRRES_09261,FGRRES_06298,FGRRES_00654,FGRRES_06282,FGRRES_09281,FGRRES_00646,FGRRES_17327,FGRRES_16767,FGRRES_04117,FGRRES_08425,FGRRES_08426,FGRRES_01419,FGRRES_05696,FGRRES_02022,FGRRES_02820,FGRRES_05843,FGRRES_00794,FGRRES_08386,FGRRES_08385,FGRRES_06150,FGRRES_12821,FGRRES_13318_M,FGRRES_10881_M,FGRRES_05453_M,FGR…	1
endopeptidase complex	GO:1905369	5	0.999381	0.360208	5	56	1311	5289	FGRRES_16733,FGRRES_02029,FGRRES_04288,FGRRES_10157,FGRRES_04979,	1
cytosol	GO:0005829	5	0.99944	0.875082	313	1443	1311	5289	FGRRES_13137,FGRRES_06369,FGRRES_06374,FGRRES_06376,FGRRES_06370,FGRRES_08498,FGRRES_08492,FGRRES_06353,FGRRES_02881_M,FGRRES_06297,FGRRES_10722,FGRRES_06284,FGRRES_06277,FGRRES_09279,FGRRES_06260,FGRRES_06127_M,FGRRES_17310,FGRRES_09831_M,FGRRES_16723,FGRRES_06206,FGRRES_16765,FGRRES_16741,FGRRES_11865,FGRRES_06307,FGRRES_04104,FGRRES_01490,FGRRES_01470,FGRRES_04117,FGRRES_04181,FGRRES_00627,FGR…	1
inner mitochondrial membrane protein complex	GO:0098800	4	0.999468	0.322746	4	50	1311	5289	FGRRES_01189,FGRRES_01196,FGRRES_00861,FGRRES_05543_M,	1
membrane-bounded organelle	GO:0043227	3	0.999477	0.943511	812	3472	1311	5289	FGRRES_13127,FGRRES_05749,FGRRES_10757,FGRRES_06364,FGRRES_13137,FGRRES_00695,FGRRES_06369,FGRRES_06375,FGRRES_06374,FGRRES_06372,FGRRES_06243,FGRRES_06376,FGRRES_06370,FGRRES_00688,FGRRES_06340,FGRRES_08498,FGRRES_13110,FGRRES_08492,FGRRES_05733,FGRRES_06215,FGRRES_02881_M,FGRRES_09261,FGRRES_00660,FGRRES_06297,FGRRES_06298,FGRRES_10728,FGRRES_06168_M,FGRRES_00654,FGRRES_06282,FGRRES_17351,FGRRE…	1
cell part	GO:0044464	2	0.99948	0.963254	1036	4339	1311	5289	FGRRES_03603,FGRRES_16912_M,FGRRES_13127,FGRRES_05749,FGRRES_10757,FGRRES_10755,FGRRES_06364,FGRRES_13137,FGRRES_03614,FGRRES_00695,FGRRES_06369,FGRRES_06375,FGRRES_06374,FGRRES_06372,FGRRES_06243,FGRRES_06376,FGRRES_06370,FGRRES_00688,FGRRES_06340,FGRRES_08498,FGRRES_13110,FGRRES_08492,FGRRES_10787,FGRRES_05733,FGRRES_06215,FGRRES_06353,FGRRES_08485,FGRRES_02881_M,FGRRES_09261,FGRRES_00660,FGRRE…	1
cytosolic part	GO:0044445	5	0.999499	0.489009	12	99	1311	5289	FGRRES_06353,FGRRES_01346,FGRRES_07101,FGRRES_10246,FGRRES_09760,FGRRES_15680_M,FGRRES_11656,FGRRES_05957,FGRRES_09544,FGRRES_10853,FGRRES_10049,FGRRES_05174,	1
cytoplasmic vesicle membrane	GO:0030659	5	0.999561	0.224129	2	36	1311	5289	FGRRES_15855_M,FGRRES_08537,	1
vesicle membrane	GO:0012506	4	0.999561	0.224129	2	36	1311	5289	FGRRES_15855_M,FGRRES_08537,	1
histone acetyltransferase complex	GO:0000123	5	0.999662	0.218072	2	37	1311	5289	FGRRES_06089,FGRRES_00280_M,	1
Golgi-associated vesicle membrane	GO:0030660	6	0.999664	0.144083	1	28	1311	5289	FGRRES_15855_M,	1
DNA repair complex	GO:1990391	3	0.999664	0.144083	1	28	1311	5289	FGRRES_04308,	1
cell	GO:0005623	2	0.999669	0.962316	1040	4360	1311	5289	FGRRES_03603,FGRRES_16912_M,FGRRES_13127,FGRRES_05749,FGRRES_10757,FGRRES_10755,FGRRES_06364,FGRRES_13137,FGRRES_03614,FGRRES_00695,FGRRES_06369,FGRRES_06375,FGRRES_06374,FGRRES_06372,FGRRES_06243,FGRRES_06376,FGRRES_06370,FGRRES_00688,FGRRES_06340,FGRRES_08498,FGRRES_13110,FGRRES_08492,FGRRES_10787,FGRRES_05733,FGRRES_06215,FGRRES_06353,FGRRES_08485,FGRRES_02881_M,FGRRES_09261,FGRRES_00660,FGRRE…	1
mitochondrial envelope	GO:0005740	5	0.999678	0.646854	38	237	1311	5289	FGRRES_13127,FGRRES_13137,FGRRES_06370,FGRRES_09261,FGRRES_06298,FGRRES_08386,FGRRES_08385,FGRRES_12821,FGRRES_10881_M,FGRRES_01395,FGRRES_09833,FGRRES_06021,FGRRES_16758_M,FGRRES_01189,FGRRES_16995,FGRRES_01196,FGRRES_00861,FGRRES_09927,FGRRES_09938,FGRRES_10422,FGRRES_06636,FGRRES_09503_M,FGRRES_12693,FGRRES_00903,FGRRES_00926,FGRRES_02543,FGRRES_05220,FGRRES_01032,FGRRES_02455,FGRRES_10144,FGR…	1
condensed chromosome	GO:0000793	6	0.999711	0.366757	6	66	1311	5289	FGRRES_01347,FGRRES_16980_M,FGRRES_01157,FGRRES_06959,FGRRES_09562,FGRRES_08501,	1
envelope	GO:0031975	3	0.999719	0.70514	61	349	1311	5289	FGRRES_13127,FGRRES_13137,FGRRES_06370,FGRRES_09261,FGRRES_06298,FGRRES_05671,FGRRES_09339,FGRRES_08386,FGRRES_08385,FGRRES_12821,FGRRES_10881_M,FGRRES_01395,FGRRES_01323,FGRRES_01324,FGRRES_09025,FGRRES_09833,FGRRES_06021,FGRRES_16758_M,FGRRES_01189,FGRRES_16995,FGRRES_01196,FGRRES_12711,FGRRES_04350,FGRRES_13254_M,FGRRES_00861,FGRRES_00866,FGRRES_09927,FGRRES_09938,FGRRES_02233,FGRRES_09965,FGR…	1
organelle envelope	GO:0031967	4	0.999719	0.70514	61	349	1311	5289	FGRRES_13127,FGRRES_13137,FGRRES_06370,FGRRES_09261,FGRRES_06298,FGRRES_05671,FGRRES_09339,FGRRES_08386,FGRRES_08385,FGRRES_12821,FGRRES_10881_M,FGRRES_01395,FGRRES_01323,FGRRES_01324,FGRRES_09025,FGRRES_09833,FGRRES_06021,FGRRES_16758_M,FGRRES_01189,FGRRES_16995,FGRRES_01196,FGRRES_12711,FGRRES_04350,FGRRES_13254_M,FGRRES_00861,FGRRES_00866,FGRRES_09927,FGRRES_09938,FGRRES_02233,FGRRES_09965,FGR…	1
chromatin	GO:0000785	5	0.999748	0.630363	35	224	1311	5289	FGRRES_06260,FGRRES_17310,FGRRES_01457,FGRRES_02026,FGRRES_05853,FGRRES_00794,FGRRES_06137,FGRRES_01300,FGRRES_09025,FGRRES_00892,FGRRES_04424,FGRRES_05498,FGRRES_15847,FGRRES_05465,FGRRES_04154_M,FGRRES_05531,FGRRES_00297,FGRRES_07262_M,FGRRES_08856,FGRRES_09994_M,FGRRES_00399,FGRRES_00329,FGRRES_00348,FGRRES_06948,FGRRES_00477,FGRRES_06661_M,FGRRES_10157,FGRRES_00460,FGRRES_07553,FGRRES_02622,F…	1
endosome	GO:0005768	6	0.999788	0.452832	11	98	1311	5289	FGRRES_08492,FGRRES_11847,FGRRES_16691,FGRRES_09928,FGRRES_05535,FGRRES_15771,FGRRES_01852,FGRRES_10272,FGRRES_06542_M,FGRRES_02758,FGRRES_10864,	1
mitochondrial membrane part	GO:0044455	3	0.999817	0.486901	14	116	1311	5289	FGRRES_13127,FGRRES_09261,FGRRES_06298,FGRRES_01189,FGRRES_01196,FGRRES_00861,FGRRES_09938,FGRRES_12693,FGRRES_00926,FGRRES_02455,FGRRES_01591,FGRRES_08694,FGRRES_05543_M,FGRRES_05070,	1
nuclear chromosome	GO:0000228	6	0.999887	0.639402	42	265	1311	5289	FGRRES_06260,FGRRES_01457,FGRRES_02026,FGRRES_05857,FGRRES_00799,FGRRES_00794,FGRRES_06137,FGRRES_13318_M,FGRRES_05453_M,FGRRES_01347,FGRRES_09025,FGRRES_06032,FGRRES_12711,FGRRES_05498,FGRRES_15847,FGRRES_01052,FGRRES_06721,FGRRES_01157,FGRRES_07020,FGRRES_04154_M,FGRRES_00297,FGRRES_01007,FGRRES_05274,FGRRES_09994_M,FGRRES_06874,FGRRES_00399,FGRRES_00329,FGRRES_00348,FGRRES_06959,FGRRES_00477,F…	1
coated vesicle	GO:0030135	6	0.999897	0.283111	4	57	1311	5289	FGRRES_02022,FGRRES_06391_M,FGRRES_00538,FGRRES_15855_M,	1
condensed nuclear chromosome	GO:0000794	7	0.999918	0.278229	4	58	1311	5289	FGRRES_01347,FGRRES_01157,FGRRES_06959,FGRRES_08501,	1
coated vesicle membrane	GO:0030662	6	0.99992	0.122252	1	33	1311	5289	FGRRES_15855_M,	1
mitochondrial part	GO:0044429	5	0.99992	0.674359	57	341	1311	5289	FGRRES_13127,FGRRES_13137,FGRRES_06370,FGRRES_05733,FGRRES_09261,FGRRES_06298,FGRRES_00654,FGRRES_06282,FGRRES_05696,FGRRES_08386,FGRRES_08385,FGRRES_12821,FGRRES_10881_M,FGRRES_04309,FGRRES_01395,FGRRES_09833,FGRRES_06021,FGRRES_16758_M,FGRRES_06755_M,FGRRES_05516,FGRRES_09002,FGRRES_01189,FGRRES_16995,FGRRES_01196,FGRRES_01254,FGRRES_00861,FGRRES_09927,FGRRES_09938,FGRRES_10422,FGRRES_06636,FGR…	1
peptidase complex	GO:1905368	4	0.999929	0.357472	7	79	1311	5289	FGRRES_16733,FGRRES_02029,FGRRES_04288,FGRRES_06089,FGRRES_10157,FGRRES_00280_M,FGRRES_04979,	1
nuclear chromatin	GO:0000790	6	0.999933	0.53467	22	166	1311	5289	FGRRES_06260,FGRRES_01457,FGRRES_02026,FGRRES_00794,FGRRES_06137,FGRRES_09025,FGRRES_15847,FGRRES_04154_M,FGRRES_00297,FGRRES_09994_M,FGRRES_00399,FGRRES_00329,FGRRES_00348,FGRRES_00477,FGRRES_06661_M,FGRRES_00460,FGRRES_02622,FGRRES_00280_M,FGRRES_00570,FGRRES_02659,FGRRES_08516,FGRRES_07406,	1
nuclear chromosome part	GO:0044454	5	0.999961	0.605946	38	253	1311	5289	FGRRES_06260,FGRRES_01457,FGRRES_02026,FGRRES_05857,FGRRES_00799,FGRRES_00794,FGRRES_06137,FGRRES_05453_M,FGRRES_01347,FGRRES_09025,FGRRES_06032,FGRRES_12711,FGRRES_05498,FGRRES_15847,FGRRES_01052,FGRRES_06721,FGRRES_01157,FGRRES_04154_M,FGRRES_00297,FGRRES_01007,FGRRES_05274,FGRRES_09994_M,FGRRES_06874,FGRRES_00399,FGRRES_00329,FGRRES_00348,FGRRES_06959,FGRRES_00477,FGRRES_06661_M,FGRRES_00460,F…	1
intracellular	GO:0005622	3	0.999963	0.953206	1007	4262	1311	5289	FGRRES_03603,FGRRES_16912_M,FGRRES_13127,FGRRES_05749,FGRRES_10757,FGRRES_10755,FGRRES_06364,FGRRES_13137,FGRRES_00695,FGRRES_06369,FGRRES_06375,FGRRES_06374,FGRRES_06372,FGRRES_06243,FGRRES_06376,FGRRES_06370,FGRRES_00688,FGRRES_06340,FGRRES_08498,FGRRES_13110,FGRRES_08492,FGRRES_05733,FGRRES_06215,FGRRES_06353,FGRRES_08485,FGRRES_02881_M,FGRRES_09261,FGRRES_00660,FGRRES_06297,FGRRES_06298,FGRRE…	1
organellar ribosome	GO:0000313	6	0.999974	0.220054	3	55	1311	5289	FGRRES_06755_M,FGRRES_09002,FGRRES_10355,	1
mitochondrial ribosome	GO:0005761	7	0.999974	0.220054	3	55	1311	5289	FGRRES_06755_M,FGRRES_09002,FGRRES_10355,	1
mitochondrial membrane	GO:0031966	4	0.999978	0.55103	28	205	1311	5289	FGRRES_13127,FGRRES_13137,FGRRES_06370,FGRRES_09261,FGRRES_06298,FGRRES_08385,FGRRES_12821,FGRRES_01395,FGRRES_06021,FGRRES_01189,FGRRES_16995,FGRRES_01196,FGRRES_00861,FGRRES_09927,FGRRES_09938,FGRRES_06636,FGRRES_12693,FGRRES_00903,FGRRES_00926,FGRRES_05220,FGRRES_02455,FGRRES_01591,FGRRES_02783,FGRRES_08694,FGRRES_05543_M,FGRRES_05070,FGRRES_08517,FGRRES_05154,	1
mitochondrial inner membrane	GO:0005743	5	0.999991	0.448258	16	144	1311	5289	FGRRES_13137,FGRRES_09261,FGRRES_06298,FGRRES_06021,FGRRES_01189,FGRRES_16995,FGRRES_01196,FGRRES_00861,FGRRES_09938,FGRRES_12693,FGRRES_05220,FGRRES_02455,FGRRES_01591,FGRRES_05543_M,FGRRES_05070,FGRRES_08517,	1
organelle inner membrane	GO:0019866	4	0.999993	0.454196	17	151	1311	5289	FGRRES_13137,FGRRES_09261,FGRRES_06298,FGRRES_06021,FGRRES_01189,FGRRES_16995,FGRRES_01196,FGRRES_00861,FGRRES_09938,FGRRES_12693,FGRRES_05220,FGRRES_02455,FGRRES_13626_M,FGRRES_01591,FGRRES_05543_M,FGRRES_05070,FGRRES_08517,	1
intracellular vesicle	GO:0097708	5	0.999994	0.477435	20	169	1311	5289	FGRRES_08492,FGRRES_11847,FGRRES_16691,FGRRES_02022,FGRRES_04237,FGRRES_06391_M,FGRRES_09928,FGRRES_05535,FGRRES_15762,FGRRES_15771,FGRRES_10327,FGRRES_01852,FGRRES_10272,FGRRES_06542_M,FGRRES_02758,FGRRES_10864,FGRRES_00538,FGRRES_15855_M,FGRRES_08537,FGRRES_08936,	1
cytoplasmic vesicle	GO:0031410	5	0.999994	0.477435	20	169	1311	5289	FGRRES_08492,FGRRES_11847,FGRRES_16691,FGRRES_02022,FGRRES_04237,FGRRES_06391_M,FGRRES_09928,FGRRES_05535,FGRRES_15762,FGRRES_15771,FGRRES_10327,FGRRES_01852,FGRRES_10272,FGRRES_06542_M,FGRRES_02758,FGRRES_10864,FGRRES_00538,FGRRES_15855_M,FGRRES_08537,FGRRES_08936,	1
vesicle	GO:0031982	4	0.999995	0.474626	20	170	1311	5289	FGRRES_08492,FGRRES_11847,FGRRES_16691,FGRRES_02022,FGRRES_04237,FGRRES_06391_M,FGRRES_09928,FGRRES_05535,FGRRES_15762,FGRRES_15771,FGRRES_10327,FGRRES_01852,FGRRES_10272,FGRRES_06542_M,FGRRES_02758,FGRRES_10864,FGRRES_00538,FGRRES_15855_M,FGRRES_08537,FGRRES_08936,	1
intracellular organelle	GO:0043229	3	0.999996	0.930079	856	3713	1311	5289	FGRRES_13127,FGRRES_05749,FGRRES_10757,FGRRES_10755,FGRRES_06364,FGRRES_13137,FGRRES_00695,FGRRES_06369,FGRRES_06375,FGRRES_06374,FGRRES_06372,FGRRES_06243,FGRRES_06376,FGRRES_06370,FGRRES_00688,FGRRES_06340,FGRRES_08498,FGRRES_13110,FGRRES_08492,FGRRES_05733,FGRRES_06215,FGRRES_06353,FGRRES_08485,FGRRES_02881_M,FGRRES_09261,FGRRES_00660,FGRRES_06297,FGRRES_06298,FGRRES_10728,FGRRES_06168_M,FGRRE…	1
organelle	GO:0043226	2	0.999997	0.929328	856	3716	1311	5289	FGRRES_13127,FGRRES_05749,FGRRES_10757,FGRRES_10755,FGRRES_06364,FGRRES_13137,FGRRES_00695,FGRRES_06369,FGRRES_06375,FGRRES_06374,FGRRES_06372,FGRRES_06243,FGRRES_06376,FGRRES_06370,FGRRES_00688,FGRRES_06340,FGRRES_08498,FGRRES_13110,FGRRES_08492,FGRRES_05733,FGRRES_06215,FGRRES_06353,FGRRES_08485,FGRRES_02881_M,FGRRES_09261,FGRRES_00660,FGRRES_06297,FGRRES_06298,FGRRES_10728,FGRRES_06168_M,FGRRE…	1
intracellular part	GO:0044424	3	0.999997	0.943465	978	4182	1311	5289	FGRRES_03603,FGRRES_16912_M,FGRRES_13127,FGRRES_05749,FGRRES_10757,FGRRES_10755,FGRRES_06364,FGRRES_13137,FGRRES_00695,FGRRES_06369,FGRRES_06375,FGRRES_06374,FGRRES_06372,FGRRES_06243,FGRRES_06376,FGRRES_06370,FGRRES_00688,FGRRES_06340,FGRRES_08498,FGRRES_13110,FGRRES_08492,FGRRES_05733,FGRRES_06215,FGRRES_06353,FGRRES_08485,FGRRES_02881_M,FGRRES_09261,FGRRES_00660,FGRRES_06297,FGRRES_06298,FGRRE…	1
small ribosomal subunit	GO:0015935	6	0.999997	0.0896517	1	45	1311	5289	FGRRES_06353,	1
ribosomal subunit	GO:0044391	5	0.999998	0.297266	7	95	1311	5289	FGRRES_06353,FGRRES_06755_M,FGRRES_09002,FGRRES_01128,FGRRES_10355,FGRRES_10246,FGRRES_09760,	1
cytoplasmic vesicle part	GO:0044433	5	0.999998	0.275068	6	88	1311	5289	FGRRES_08492,FGRRES_11847,FGRRES_10272,FGRRES_06542_M,FGRRES_15855_M,FGRRES_08537,	1
ribosome	GO:0005840	5	0.999999	0.570895	45	318	1311	5289	FGRRES_10755,FGRRES_06353,FGRRES_16717,FGRRES_04181,FGRRES_02025,FGRRES_20078,FGRRES_05853,FGRRES_05858,FGRRES_08421_M,FGRRES_04308,FGRRES_01343,FGRRES_06181,FGRRES_01314,FGRRES_06755_M,FGRRES_06586,FGRRES_09002,FGRRES_07182,FGRRES_17102,FGRRES_07101,FGRRES_17193,FGRRES_07086,FGRRES_06705,FGRRES_01128,FGRRES_10355,FGRRES_00286,FGRRES_10304,FGRRES_06804,FGRRES_06841,FGRRES_05249,FGRRES_17695,FGRRE…	1
membrane protein complex	GO:0098796	4	0.999999	0.463947	23	200	1311	5289	FGRRES_13127,FGRRES_13137,FGRRES_06277,FGRRES_04104,FGRRES_16691,FGRRES_16673,FGRRES_17670_M,FGRRES_09341,FGRRES_09021,FGRRES_01189,FGRRES_01196,FGRRES_01981,FGRRES_00861,FGRRES_07003,FGRRES_05535,FGRRES_02143,FGRRES_16123_4_M,FGRRES_02455,FGRRES_07235,FGRRES_16433_M,FGRRES_05543_M,FGRRES_07450,FGRRES_05160,	1
organelle membrane	GO:0031090	3	1	0.65487	81	499	1311	5289	FGRRES_13127,FGRRES_13137,FGRRES_06370,FGRRES_00688,FGRRES_06215,FGRRES_09261,FGRRES_06298,FGRRES_09281,FGRRES_07832,FGRRES_16726,FGRRES_16723,FGRRES_16739,FGRRES_06685_M,FGRRES_16691,FGRRES_16673,FGRRES_04178,FGRRES_08385,FGRRES_12821,FGRRES_17207,FGRRES_01395,FGRRES_04242,FGRRES_04278,FGRRES_09021,FGRRES_06021,FGRRES_04412,FGRRES_01189,FGRRES_16995,FGRRES_01196,FGRRES_06391_M,FGRRES_09806_M,FGR…	1
cytoplasm	GO:0005737	4	1	0.892181	663	2998	1311	5289	FGRRES_03603,FGRRES_13127,FGRRES_05749,FGRRES_10755,FGRRES_06364,FGRRES_13137,FGRRES_06369,FGRRES_06375,FGRRES_06374,FGRRES_06376,FGRRES_06370,FGRRES_00688,FGRRES_08498,FGRRES_13110,FGRRES_08492,FGRRES_05733,FGRRES_06215,FGRRES_06353,FGRRES_08485,FGRRES_02881_M,FGRRES_09261,FGRRES_06297,FGRRES_06298,FGRRES_10722,FGRRES_00654,FGRRES_06282,FGRRES_06284,FGRRES_09281,FGRRES_00646,FGRRES_07180_M,FGRRE…	1
macromolecular complex	GO:0032991	2	1	0.827782	372	1813	1311	5289	FGRRES_16912_M,FGRRES_13127,FGRRES_10757,FGRRES_10755,FGRRES_06364,FGRRES_13137,FGRRES_00695,FGRRES_06372,FGRRES_06243,FGRRES_06376,FGRRES_00688,FGRRES_06340,FGRRES_08492,FGRRES_05733,FGRRES_06353,FGRRES_00660,FGRRES_10728,FGRRES_06282,FGRRES_09281,FGRRES_06277,FGRRES_09279,FGRRES_06260,FGRRES_16717,FGRRES_06127_M,FGRRES_17310,FGRRES_17337,FGRRES_11847,FGRRES_06203,FGRRES_16766,FGRRES_16767,FGRRE…	1
cytoplasmic part	GO:0044444	4	1	0.869543	591	2742	1311	5289	FGRRES_13127,FGRRES_05749,FGRRES_10755,FGRRES_06364,FGRRES_13137,FGRRES_06369,FGRRES_06375,FGRRES_06374,FGRRES_06376,FGRRES_06370,FGRRES_00688,FGRRES_08498,FGRRES_13110,FGRRES_08492,FGRRES_05733,FGRRES_06215,FGRRES_06353,FGRRES_08485,FGRRES_02881_M,FGRRES_09261,FGRRES_06297,FGRRES_06298,FGRRES_10722,FGRRES_00654,FGRRES_06282,FGRRES_06284,FGRRES_09281,FGRRES_00646,FGRRES_07180_M,FGRRES_06277,FGRRE…	1
protein complex	GO:0043234	3	1	0.699752	179	1032	1311	5289	FGRRES_16912_M,FGRRES_13127,FGRRES_06364,FGRRES_13137,FGRRES_00695,FGRRES_06340,FGRRES_08492,FGRRES_05733,FGRRES_00660,FGRRES_06277,FGRRES_09279,FGRRES_06260,FGRRES_17310,FGRRES_11847,FGRRES_16766,FGRRES_16767,FGRRES_16733,FGRRES_11865,FGRRES_04104,FGRRES_16691,FGRRES_16673,FGRRES_02054,FGRRES_01438,FGRRES_07930,FGRRES_02029,FGRRES_02026,FGRRES_05671,FGRRES_10795,FGRRES_05853,FGRRES_17670_M,FGRRE…	1
cellular_component	GO:0005575	0	1	1	1311	5289	1311	5289	FGRRES_03603,FGRRES_16912_M,FGRRES_13127,FGRRES_05749,FGRRES_10757,FGRRES_10755,FGRRES_06364,FGRRES_09210,FGRRES_13137,FGRRES_03614,FGRRES_00695,FGRRES_06369,FGRRES_06375,FGRRES_06374,FGRRES_06372,FGRRES_06243,FGRRES_06376,FGRRES_06370,FGRRES_00688,FGRRES_05723,FGRRES_06340,FGRRES_08498,FGRRES_13110,FGRRES_08492,FGRRES_10787,FGRRES_05733,FGRRES_06215,FGRRES_06353,FGRRES_08485,FGRRES_06222,FGRRES_…	1
	Note: Categories whose corrected p-value<=0.05 were highlighted in yellow

## Sheet: ΔFgSAS3 Cellular Component
Table S4 Go enrichment of DEGs of ΔFgSAS3 and ΔFgSAS3 mutants
ΔFgSAS3 Cellular Component
GO_Name	GO_ID	GO_Level	P_value	EnrichmentScore	HitsGenesCountsInSelectedSet	HitsGenesCountsInBackground	AllGenesCountsInSelectedSet	AllGenesCountsInBackground	GenesOfSelectedSetInGOterm	corrected p-value(BH method)
intrinsic component of membrane	GO:0031224	3	4.25215e-14	1.48977	250	1231	721	5289	FGRRES_09224,FGRRES_13127,FGRRES_09638,FGRRES_06364,FGRRES_07894,FGRRES_16276,FGRRES_05723,FGRRES_16293,FGRRES_09261,FGRRES_00663,FGRRES_02119,FGRRES_09681,FGRRES_01785,FGRRES_06298,FGRRES_02522,FGRRES_00257,FGRRES_09255,FGRRES_09673,FGRRES_00646,FGRRES_10747,FGRRES_09039_M,FGRRES_08163_M,FGRRES_11029,FGRRES_09297,FGRRES_03168,FGRRES_04580,FGRRES_11467,FGRRES_03111,FGRRES_11480,FGRRES_11069,FGRRE…	1.03115e-11
integral component of membrane	GO:0016021	4	3.9857e-14	1.4923	249	1224	721	5289	FGRRES_09224,FGRRES_13127,FGRRES_09638,FGRRES_06364,FGRRES_07894,FGRRES_16276,FGRRES_05723,FGRRES_16293,FGRRES_09261,FGRRES_00663,FGRRES_02119,FGRRES_09681,FGRRES_01785,FGRRES_06298,FGRRES_02522,FGRRES_00257,FGRRES_09255,FGRRES_09673,FGRRES_00646,FGRRES_10747,FGRRES_09039_M,FGRRES_08163_M,FGRRES_11029,FGRRES_09297,FGRRES_03168,FGRRES_04580,FGRRES_11467,FGRRES_03111,FGRRES_11480,FGRRES_11069,FGRRE…	1.93306e-11
membrane part	GO:0044425	2	1.06865e-08	1.31982	267	1484	721	5289	FGRRES_09224,FGRRES_13127,FGRRES_09638,FGRRES_06364,FGRRES_07894,FGRRES_13137,FGRRES_16276,FGRRES_05723,FGRRES_16293,FGRRES_09261,FGRRES_00663,FGRRES_02119,FGRRES_02527,FGRRES_09681,FGRRES_01785,FGRRES_06298,FGRRES_02522,FGRRES_00257,FGRRES_09255,FGRRES_09673,FGRRES_00646,FGRRES_10747,FGRRES_09039_M,FGRRES_08163_M,FGRRES_11029,FGRRES_09297,FGRRES_03168,FGRRES_04580,FGRRES_11467,FGRRES_03111,FGRRE…	1.29574e-06
membrane	GO:0016020	2	8.07047e-09	1.26963	324	1872	721	5289	FGRRES_09224,FGRRES_13127,FGRRES_09638,FGRRES_06364,FGRRES_07894,FGRRES_13137,FGRRES_16276,FGRRES_05723,FGRRES_16293,FGRRES_10787,FGRRES_09261,FGRRES_00663,FGRRES_02119,FGRRES_02527,FGRRES_09681,FGRRES_01785,FGRRES_06298,FGRRES_02522,FGRRES_00257,FGRRES_09255,FGRRES_09673,FGRRES_00646,FGRRES_10747,FGRRES_07832,FGRRES_09039_M,FGRRES_08163_M,FGRRES_11029,FGRRES_16723,FGRRES_09297,FGRRES_03162,FGRRE…	1.30473e-06
plasma membrane	GO:0005886	3	0.00160262	1.68878	32	139	721	5289	FGRRES_10787,FGRRES_09681,FGRRES_11029,FGRRES_16701,FGRRES_03111,FGRRES_08819,FGRRES_16964_M,FGRRES_10272,FGRRES_07946,FGRRES_09778,FGRRES_10222,FGRRES_04204,FGRRES_01364,FGRRES_03477,FGRRES_07235,FGRRES_05890,FGRRES_17518,FGRRES_03882,FGRRES_10150,FGRRES_06579,FGRRES_06509,FGRRES_11250,FGRRES_04370,FGRRES_07587,FGRRES_16803,FGRRES_10042,FGRRES_02698,FGRRES_09988,FGRRES_11939,FGRRES_07425,FGRRES_…	0.155454
carbamoyl-phosphate synthase complex	GO:0005951	5	0.00252419	7.33564	3	3	721	5289	FGRRES_09638,FGRRES_01217,FGRRES_09554,	0.204039
protein histidine kinase complex	GO:0009365	7	0.00453305	2.79453	8	21	721	5289	FGRRES_10606,FGRRES_02449,FGRRES_00737,FGRRES_07623,FGRRES_00856,FGRRES_10042,FGRRES_08540,FGRRES_07493,	0.314076
cellular bud membrane	GO:0033101	4	0.0185611	7.33564	2	2	721	5289	FGRRES_11029,FGRRES_04370,	1
CBF3 complex	GO:0031518	4	0.0185611	7.33564	2	2	721	5289	FGRRES_16767,FGRRES_06922,	1
ARC complex	GO:0033167	6	0.0185611	7.33564	2	2	721	5289	FGRRES_00348,FGRRES_04997,	1
Atg12-Atg5-Atg16 complex	GO:0034274	4	0.0185611	7.33564	2	2	721	5289	FGRRES_13550,FGRRES_10053,	1
ribonucleoside-diphosphate reductase complex	GO:0005971	6	0.0185611	7.33564	2	2	721	5289	FGRRES_05409,FGRRES_05174,	1
nitrate reductase complex	GO:0009325	4	0.0185611	7.33564	2	2	721	5289	FGRRES_17337,FGRRES_15910,	1
oxidoreductase complex	GO:1990204	3	0.0304491	1.83391	11	44	721	5289	FGRRES_13137,FGRRES_05733,FGRRES_06127_M,FGRRES_17337,FGRRES_04309,FGRRES_15910,FGRRES_04299,FGRRES_01981,FGRRES_05409,FGRRES_05160,FGRRES_05174,	1
RNAi effector complex	GO:0031332	5	0.0506348	4.89043	2	3	721	5289	FGRRES_00348,FGRRES_04997,	1
Ku70:Ku80 complex	GO:0043564	4	0.0506348	4.89043	2	3	721	5289	FGRRES_12711,FGRRES_06721,	1
voltage-gated calcium channel complex	GO:0005891	7	0.0506348	4.89043	2	3	721	5289	FGRRES_01364,FGRRES_11939,	1
calcium channel complex	GO:0034704	6	0.0506348	4.89043	2	3	721	5289	FGRRES_01364,FGRRES_11939,	1
autophagosome	GO:0005776	6	0.0506348	4.89043	2	3	721	5289	FGRRES_10053,FGRRES_05547,	1
plasma membrane part	GO:0044459	3	0.0542517	1.68109	11	48	721	5289	FGRRES_11029,FGRRES_10272,FGRRES_07946,FGRRES_01364,FGRRES_07235,FGRRES_04370,FGRRES_16803,FGRRES_10042,FGRRES_02698,FGRRES_11939,FGRRES_05160,	1
cell periphery	GO:0071944	3	0.0549905	1.25373	47	275	721	5289	FGRRES_10787,FGRRES_08485,FGRRES_09681,FGRRES_09289,FGRRES_11029,FGRRES_16701,FGRRES_03111,FGRRES_16733,FGRRES_08819,FGRRES_16146,FGRRES_16964_M,FGRRES_10272,FGRRES_07946,FGRRES_07284,FGRRES_09778,FGRRES_10222,FGRRES_04204,FGRRES_01364,FGRRES_03477,FGRRES_15729_M,FGRRES_07235,FGRRES_07218,FGRRES_05890,FGRRES_17518,FGRRES_03882,FGRRES_10150,FGRRES_10111,FGRRES_06579,FGRRES_06572,FGRRES_06509,FGRRE…	1
beta-galactosidase complex	GO:0009341	4	0.0577787	3.14385	3	7	721	5289	FGRRES_03904,FGRRES_16875,FGRRES_03343,	1
fatty acid synthase complex	GO:0005835	4	0.0577787	3.14385	3	7	721	5289	FGRRES_15680_M,FGRRES_11656,FGRRES_10853,	1
protein kinase complex	GO:1902911	6	0.0871459	1.59471	10	46	721	5289	FGRRES_10606,FGRRES_02449,FGRRES_04308,FGRRES_00737,FGRRES_07623,FGRRES_00856,FGRRES_05630_M,FGRRES_10042,FGRRES_08540,FGRRES_07493,	1
pre-autophagosomal structure membrane	GO:0034045	5	0.0922014	3.66782	2	4	721	5289	FGRRES_13550,FGRRES_10053,	1
biotin carboxylase complex	GO:0009343	5	0.0922014	3.66782	2	4	721	5289	FGRRES_07075_M,FGRRES_08688_M,	1
new mitotic spindle pole body	GO:0071958	8	0.0922014	3.66782	2	4	721	5289	FGRRES_06364,FGRRES_09408,	1
cation channel complex	GO:0034703	5	0.0922014	3.66782	2	4	721	5289	FGRRES_01364,FGRRES_11939,	1
ion channel complex	GO:0034702	4	0.0922014	3.66782	2	4	721	5289	FGRRES_01364,FGRRES_11939,	1
horsetail nucleus	GO:0071686	6	0.0922014	3.66782	2	4	721	5289	FGRRES_06364,FGRRES_17271,	1
phosphopyruvate hydratase complex	GO:0000015	6	0.136321	7.33564	1	1	721	5289	FGRRES_01346,	1
endoplasmic reticulum-Golgi intermediate compartment membrane	GO:0033116	5	0.136321	7.33564	1	1	721	5289	FGRRES_01276,	1
Tea1 cell-end complex	GO:0031500	5	0.136321	7.33564	1	1	721	5289	FGRRES_16146,	1
extrinsic component of autophagosome membrane	GO:0097635	6	0.136321	7.33564	1	1	721	5289	FGRRES_05547,	1
DNA ligase IV complex	GO:0032807	4	0.136321	7.33564	1	1	721	5289	FGRRES_04154_M,	1
DNA polymerase processivity factor complex	GO:0044796	4	0.136321	7.33564	1	1	721	5289	FGRRES_01052,	1
PCNA complex	GO:0043626	5	0.136321	7.33564	1	1	721	5289	FGRRES_01052,	1
SREBP-SCAP complex	GO:0032936	5	0.136321	7.33564	1	1	721	5289	FGRRES_07450,	1
decaprenyl diphosphate synthase complex	GO:0032476	5	0.136321	7.33564	1	1	721	5289	FGRRES_10933,	1
formate dehydrogenase complex	GO:0009326	4	0.136321	7.33564	1	1	721	5289	FGRRES_06127_M,	1
3-isopropylmalate dehydratase complex	GO:0009316	6	0.136321	7.33564	1	1	721	5289	FGRRES_09589,	1
prospore membrane spindle pole body attachment site	GO:0070057	3	0.136321	7.33564	1	1	721	5289	FGRRES_00497,	1
aspartate carbamoyltransferase complex	GO:0009347	3	0.136321	7.33564	1	1	721	5289	FGRRES_09638,	1
DPS complex	GO:1990567	4	0.136321	7.33564	1	1	721	5289	FGRRES_05413,	1
glyoxysome	GO:0009514	7	0.136321	7.33564	1	1	721	5289	FGRRES_09896,	1
RITS complex	GO:0030958	6	0.136321	7.33564	1	1	721	5289	FGRRES_00348,	1
central plaque of spindle pole body	GO:0005823	6	0.136321	7.33564	1	1	721	5289	FGRRES_01891_M,	1
palmitoyltransferase complex	GO:0002178	5	0.140084	2.93426	2	5	721	5289	FGRRES_04102,FGRRES_08531,	1
acetyl-CoA carboxylase complex	GO:0009317	5	0.140084	2.93426	2	5	721	5289	FGRRES_07075_M,FGRRES_08688_M,	1
endoplasmic reticulum palmitoyltransferase complex	GO:0031211	6	0.140084	2.93426	2	5	721	5289	FGRRES_04102,FGRRES_08531,	1
extrinsic component of cytoplasmic side of plasma membrane	GO:0031234	5	0.191792	2.44521	2	6	721	5289	FGRRES_10272,FGRRES_07235,	1
Set1C/COMPASS complex	GO:0048188	6	0.191792	2.44521	2	6	721	5289	FGRRES_05413,FGRRES_09564,	1
mitochondrial tricarboxylic acid cycle enzyme complex	GO:0030062	5	0.191792	2.44521	2	6	721	5289	FGRRES_05733,FGRRES_04309,	1
perinuclear region of cytoplasm	GO:0048471	5	0.191792	2.44521	2	6	721	5289	FGRRES_05737_M,FGRRES_08531,	1
cytoplasmic side of plasma membrane	GO:0009898	4	0.217999	1.83391	3	12	721	5289	FGRRES_10272,FGRRES_07235,FGRRES_02698,	1
alpha-1,6-mannosyltransferase complex	GO:0000136	5	0.2215	1.52826	5	24	721	5289	FGRRES_09255,FGRRES_06856,FGRRES_04278,FGRRES_02714,FGRRES_08935,	1
succinate dehydrogenase complex	GO:0045281	4	0.245398	2.0959	2	7	721	5289	FGRRES_13137,FGRRES_01981,	1
respiratory chain complex II	GO:0045273	4	0.245398	2.0959	2	7	721	5289	FGRRES_13137,FGRRES_01981,	1
mannosyltransferase complex	GO:0031501	4	0.248216	1.46713	5	25	721	5289	FGRRES_09255,FGRRES_06856,FGRRES_04278,FGRRES_02714,FGRRES_08935,	1
Golgi cis cisterna	GO:0000137	7	0.248216	1.46713	5	25	721	5289	FGRRES_09255,FGRRES_06856,FGRRES_04278,FGRRES_02714,FGRRES_08935,	1
vacuolar transporter chaperone complex	GO:0033254	5	0.25408	3.66782	1	2	721	5289	FGRRES_09952,	1
periplasmic space	GO:0042597	3	0.25408	3.66782	1	2	721	5289	FGRRES_03614,	1
autophagosome membrane	GO:0000421	7	0.25408	3.66782	1	2	721	5289	FGRRES_05547,	1
new growing cell tip	GO:0035841	5	0.25408	3.66782	1	2	721	5289	FGRRES_01891_M,	1
mitochondrial isocitrate dehydrogenase complex (NAD+)	GO:0005962	6	0.25408	3.66782	1	2	721	5289	FGRRES_05733,	1
high-affinity iron permease complex	GO:0033573	6	0.25408	3.66782	1	2	721	5289	FGRRES_05160,	1
acetolactate synthase complex	GO:0005948	5	0.25408	3.66782	1	2	721	5289	FGRRES_01086,	1
ferroxidase complex	GO:1905862	4	0.25408	3.66782	1	2	721	5289	FGRRES_05160,	1
Mei2 nuclear dot complex	GO:0033620	5	0.25408	3.66782	1	2	721	5289	FGRRES_20304,	1
sulfite reductase complex (NADPH)	GO:0009337	4	0.25408	3.66782	1	2	721	5289	FGRRES_02482,	1
prospore membrane leading edge	GO:0070056	3	0.25408	3.66782	1	2	721	5289	FGRRES_00497,	1
Ragulator complex	GO:0071986	7	0.25408	3.66782	1	2	721	5289	FGRRES_11208,	1
cellular bud neck septin collar	GO:0032174	5	0.25408	3.66782	1	2	721	5289	FGRRES_07218,	1
septin collar	GO:0032173	7	0.25408	3.66782	1	2	721	5289	FGRRES_07218,	1
isocitrate dehydrogenase complex (NAD+)	GO:0045242	5	0.25408	3.66782	1	2	721	5289	FGRRES_05733,	1
nuclear euchromatin	GO:0005719	7	0.25408	3.66782	1	2	721	5289	FGRRES_09025,	1
euchromatin	GO:0000791	6	0.25408	3.66782	1	2	721	5289	FGRRES_09025,	1
early endosome membrane	GO:0031901	8	0.25408	3.66782	1	2	721	5289	FGRRES_06542_M,	1
cell septum	GO:0030428	3	0.256642	1.69284	3	13	721	5289	FGRRES_16633,FGRRES_17518,FGRRES_01891_M,	1
integral component of plasma membrane	GO:0005887	5	0.256642	1.69284	3	13	721	5289	FGRRES_16803,FGRRES_10042,FGRRES_05160,	1
intrinsic component of plasma membrane	GO:0031226	4	0.296096	1.57192	3	14	721	5289	FGRRES_16803,FGRRES_10042,FGRRES_05160,	1
extrinsic component of plasma membrane	GO:0019897	4	0.299424	1.83391	2	8	721	5289	FGRRES_10272,FGRRES_07235,	1
fungal-type vacuole	GO:0000324	7	0.303217	1.11824	25	164	721	5289	FGRRES_07832,FGRRES_16723,FGRRES_06685_M,FGRRES_07373,FGRRES_04178,FGRRES_01006,FGRRES_10243,FGRRES_06542_M,FGRRES_00371,FGRRES_02400,FGRRES_09723,FGRRES_10145,FGRRES_16433_M,FGRRES_06527,FGRRES_15834_M,FGRRES_11250,FGRRES_03379,FGRRES_04370,FGRRES_05446,FGRRES_09952,FGRRES_01606,FGRRES_15855_M,FGRRES_06815_M,FGRRES_05547,FGRRES_00017,	1
storage vacuole	GO:0000322	6	0.303217	1.11824	25	164	721	5289	FGRRES_07832,FGRRES_16723,FGRRES_06685_M,FGRRES_07373,FGRRES_04178,FGRRES_01006,FGRRES_10243,FGRRES_06542_M,FGRRES_00371,FGRRES_02400,FGRRES_09723,FGRRES_10145,FGRRES_16433_M,FGRRES_06527,FGRRES_15834_M,FGRRES_11250,FGRRES_03379,FGRRES_04370,FGRRES_05446,FGRRES_09952,FGRRES_01606,FGRRES_15855_M,FGRRES_06815_M,FGRRES_05547,FGRRES_00017,	1
lytic vacuole	GO:0000323	6	0.303217	1.11824	25	164	721	5289	FGRRES_07832,FGRRES_16723,FGRRES_06685_M,FGRRES_07373,FGRRES_04178,FGRRES_01006,FGRRES_10243,FGRRES_06542_M,FGRRES_00371,FGRRES_02400,FGRRES_09723,FGRRES_10145,FGRRES_16433_M,FGRRES_06527,FGRRES_15834_M,FGRRES_11250,FGRRES_03379,FGRRES_04370,FGRRES_05446,FGRRES_09952,FGRRES_01606,FGRRES_15855_M,FGRRES_06815_M,FGRRES_05547,FGRRES_00017,	1
cytoplasmic side of membrane	GO:0098562	4	0.335861	1.46713	3	15	721	5289	FGRRES_10272,FGRRES_07235,FGRRES_02698,	1
side of membrane	GO:0098552	3	0.335861	1.46713	3	15	721	5289	FGRRES_10272,FGRRES_07235,FGRRES_02698,	1
histone methyltransferase complex	GO:0035097	5	0.352762	1.63014	2	9	721	5289	FGRRES_05413,FGRRES_09564,	1
myosin complex	GO:0016459	4	0.352762	1.63014	2	9	721	5289	FGRRES_15914_M,FGRRES_01964,	1
microtubule organizing center part	GO:0044450	5	0.352762	1.63014	2	9	721	5289	FGRRES_06364,FGRRES_01891_M,	1
Tor2-Mei2-Ste11 complex	GO:0034064	4	0.355803	2.44521	1	3	721	5289	FGRRES_20304,	1
polarisome	GO:0000133	4	0.355803	2.44521	1	3	721	5289	FGRRES_16146,	1
1,3-beta-D-glucan synthase complex	GO:0000148	4	0.355803	2.44521	1	3	721	5289	FGRRES_07946,	1
PeBoW complex	GO:0070545	4	0.355803	2.44521	1	3	721	5289	FGRRES_11603,	1
CoA-synthesizing protein complex	GO:1990143	4	0.355803	2.44521	1	3	721	5289	FGRRES_08803,	1
EKC/KEOPS complex	GO:0000408	4	0.355803	2.44521	1	3	721	5289	FGRRES_04887,	1
old growing cell tip	GO:0035840	5	0.355803	2.44521	1	3	721	5289	FGRRES_01891_M,	1
mitotic checkpoint complex	GO:0033597	4	0.355803	2.44521	1	3	721	5289	FGRRES_00660,	1
Slx1-Slx4 complex	GO:0033557	4	0.355803	2.44521	1	3	721	5289	FGRRES_00799,	1
COP9 signalosome	GO:0008180	4	0.355803	2.44521	1	3	721	5289	FGRRES_02584,	1
linear element	GO:0030998	7	0.355803	2.44521	1	3	721	5289	FGRRES_01157,	1
glycerol-3-phosphate dehydrogenase complex	GO:0009331	5	0.355803	2.44521	1	3	721	5289	FGRRES_04299,	1
Lid2 complex	GO:0048189	4	0.355803	2.44521	1	3	721	5289	FGRRES_09564,	1
RAVE complex	GO:0043291	4	0.355803	2.44521	1	3	721	5289	FGRRES_06922,	1
horsetail nucleus leading edge	GO:0071687	5	0.355803	2.44521	1	3	721	5289	FGRRES_06364,	1
Mre11 complex	GO:0030870	4	0.355803	2.44521	1	3	721	5289	FGRRES_01699_M,	1
transmembrane transporter complex	GO:1902495	3	0.375497	1.37543	3	16	721	5289	FGRRES_01364,FGRRES_11939,FGRRES_05160,	1
kinesin complex	GO:0005871	5	0.375497	1.37543	3	16	721	5289	FGRRES_06149,FGRRES_16336,FGRRES_15772,	1
lipid droplet	GO:0005811	5	0.384983	1.27576	4	23	721	5289	FGRRES_00298,FGRRES_02078,FGRRES_01349,FGRRES_02783,	1
sarcoplasm	GO:0016528	5	0.404597	1.46713	2	10	721	5289	FGRRES_02400,FGRRES_09515,	1
sarcoplasmic reticulum	GO:0016529	6	0.404597	1.46713	2	10	721	5289	FGRRES_02400,FGRRES_09515,	1
mitotic spindle	GO:0072686	6	0.417745	1.15826	6	38	721	5289	FGRRES_00270,FGRRES_01870,FGRRES_00325,FGRRES_09520,FGRRES_11093,FGRRES_15772,	1
GTPase complex	GO:1905360	4	0.44367	1.83391	1	4	721	5289	FGRRES_07235,	1
synaptonemal structure	GO:0099086	6	0.44367	1.83391	1	4	721	5289	FGRRES_01157,	1
TRC complex	GO:0072380	5	0.44367	1.83391	1	4	721	5289	FGRRES_05957,	1
ER membrane insertion complex	GO:0072379	4	0.44367	1.83391	1	4	721	5289	FGRRES_05957,	1
fungal-type vacuole lumen	GO:0000328	7	0.44367	1.83391	1	4	721	5289	FGRRES_00017,	1
serine C-palmitoyltransferase complex	GO:0017059	7	0.44367	1.83391	1	4	721	5289	FGRRES_04102,	1
non-growing cell tip	GO:0035839	4	0.44367	1.83391	1	4	721	5289	FGRRES_16146,	1
mitochondrial alpha-ketoglutarate dehydrogenase complex	GO:0005947	6	0.44367	1.83391	1	4	721	5289	FGRRES_04309,	1
1-alkyl-2-acetylglycerophosphocholine esterase complex	GO:0008247	4	0.44367	1.83391	1	4	721	5289	FGRRES_05937,	1
mitochondrial oxoglutarate dehydrogenase complex	GO:0009353	7	0.44367	1.83391	1	4	721	5289	FGRRES_04309,	1
GINS complex	GO:0000811	5	0.44367	1.83391	1	4	721	5289	FGRRES_01007,	1
heterotrimeric G-protein complex	GO:0005834	4	0.44367	1.83391	1	4	721	5289	FGRRES_07235,	1
SPOTS complex	GO:0035339	8	0.44367	1.83391	1	4	721	5289	FGRRES_04102,	1
Golgi cisterna	GO:0031985	6	0.446683	1.14619	5	32	721	5289	FGRRES_09255,FGRRES_06856,FGRRES_04278,FGRRES_02714,FGRRES_08935,	1
pre-autophagosomal structure	GO:0000407	5	0.452935	1.22261	3	18	721	5289	FGRRES_13550,FGRRES_10053,FGRRES_05547,	1
cortical endoplasmic reticulum	GO:0032541	6	0.454346	1.33375	2	11	721	5289	FGRRES_16733,FGRRES_08531,	1
endoplasmic reticulum tubular network	GO:0071782	6	0.454346	1.33375	2	11	721	5289	FGRRES_16733,FGRRES_08531,	1
Golgi stack	GO:0005795	6	0.474731	1.11146	5	33	721	5289	FGRRES_09255,FGRRES_06856,FGRRES_04278,FGRRES_02714,FGRRES_08935,	1
replication fork protection complex	GO:0031298	4	0.49016	1.15826	3	19	721	5289	FGRRES_01007,FGRRES_06874,FGRRES_09520,	1
tricarboxylic acid cycle enzyme complex	GO:0045239	4	0.501616	1.22261	2	12	721	5289	FGRRES_05733,FGRRES_04309,	1
mRNA cleavage and polyadenylation specificity factor complex	GO:0005847	5	0.501616	1.22261	2	12	721	5289	FGRRES_10795,FGRRES_05413,	1
cell wall	GO:0005618	4	0.51258	1.08676	4	27	721	5289	FGRRES_09289,FGRRES_15729_M,FGRRES_06572,FGRRES_05757_M,	1
external encapsulating structure	GO:0030312	3	0.51258	1.08676	4	27	721	5289	FGRRES_09289,FGRRES_15729_M,FGRRES_06572,FGRRES_05757_M,	1
vacuole	GO:0005773	5	0.513047	1.00914	26	189	721	5289	FGRRES_07832,FGRRES_16723,FGRRES_06685_M,FGRRES_07373,FGRRES_04178,FGRRES_01006,FGRRES_10243,FGRRES_06542_M,FGRRES_00371,FGRRES_02400,FGRRES_09723,FGRRES_10145,FGRRES_16433_M,FGRRES_06527,FGRRES_15834_M,FGRRES_11250,FGRRES_03379,FGRRES_04370,FGRRES_05446,FGRRES_09952,FGRRES_01606,FGRRES_10053,FGRRES_15855_M,FGRRES_06815_M,FGRRES_05547,FGRRES_00017,	1
Cdc73/Paf1 complex	GO:0016593	5	0.519567	1.46713	1	5	721	5289	FGRRES_06948,	1
meiotic spindle	GO:0072687	6	0.519567	1.46713	1	5	721	5289	FGRRES_15772,	1
ascospore wall	GO:0005619	6	0.519567	1.46713	1	5	721	5289	FGRRES_15729_M,	1
mitotic spindle midzone	GO:1990023	6	0.519567	1.46713	1	5	721	5289	FGRRES_15772,	1
meiotic spindle pole body	GO:0035974	7	0.519567	1.46713	1	5	721	5289	FGRRES_00497,	1
cellular bud neck septin structure	GO:0000399	4	0.519567	1.46713	1	5	721	5289	FGRRES_07218,	1
box C/D snoRNP complex	GO:0031428	6	0.519567	1.46713	1	5	721	5289	FGRRES_01870,	1
perinuclear endoplasmic reticulum	GO:0097038	6	0.519567	1.46713	1	5	721	5289	FGRRES_08531,	1
single-stranded DNA-dependent ATP-dependent DNA helicase complex	GO:0017117	5	0.519567	1.46713	1	5	721	5289	FGRRES_06922,	1
CCR4-NOT complex	GO:0030014	4	0.519567	1.46713	1	5	721	5289	FGRRES_07165,	1
cleavage apparatus septin structure	GO:0032161	4	0.519567	1.46713	1	5	721	5289	FGRRES_07218,	1
oxoglutarate dehydrogenase complex	GO:0045252	6	0.519567	1.46713	1	5	721	5289	FGRRES_04309,	1
spore wall	GO:0031160	5	0.519567	1.46713	1	5	721	5289	FGRRES_15729_M,	1
dihydrolipoyl dehydrogenase complex	GO:0045240	5	0.519567	1.46713	1	5	721	5289	FGRRES_04309,	1
Ada2/Gcn5/Ada3 transcription activator complex	GO:0005671	4	0.519567	1.46713	1	5	721	5289	FGRRES_00280_M,	1
vacuolar lumen	GO:0005775	6	0.519567	1.46713	1	5	721	5289	FGRRES_00017,	1
early endosome	GO:0005769	7	0.519567	1.46713	1	5	721	5289	FGRRES_06542_M,	1
t-UTP complex	GO:0034455	4	0.519567	1.46713	1	5	721	5289	FGRRES_00270,	1
mitochondrial nucleoid	GO:0042645	3	0.526097	1.10035	3	20	721	5289	FGRRES_05733,FGRRES_04309,FGRRES_10118,	1
nucleoid	GO:0009295	2	0.526097	1.10035	3	20	721	5289	FGRRES_05733,FGRRES_04309,FGRRES_10118,	1
chromosome, telomeric region	GO:0000781	6	0.529287	1.04795	5	35	721	5289	FGRRES_01699_M,FGRRES_12711,FGRRES_04887,FGRRES_06721,FGRRES_01157,	1
extracellular region	GO:0005576	2	0.530381	1.01181	12	87	721	5289	FGRRES_17235_M,FGRRES_11032,FGRRES_08003,FGRRES_02890,FGRRES_10670,FGRRES_04430,FGRRES_03379,FGRRES_13834,FGRRES_12483_M,FGRRES_03795,FGRRES_03311,FGRRES_02658,	1
microtubule associated complex	GO:0005875	4	0.542642	1.04795	4	28	721	5289	FGRRES_16146,FGRRES_06149,FGRRES_16336,FGRRES_15772,	1
plasma membrane protein complex	GO:0098797	4	0.546156	1.12856	2	13	721	5289	FGRRES_07235,FGRRES_05160,	1
anaphase-promoting complex	GO:0005680	6	0.546156	1.12856	2	13	721	5289	FGRRES_00660,FGRRES_10728,	1
intrinsic component of vacuolar membrane	GO:0031310	5	0.585122	1.22261	1	6	721	5289	FGRRES_09952,	1
protein kinase CK2 complex	GO:0005956	4	0.585122	1.22261	1	6	721	5289	FGRRES_16299,	1
PAS complex	GO:0070772	5	0.585122	1.22261	1	6	721	5289	FGRRES_10243,	1
mitochondrial outer membrane translocase complex	GO:0005742	5	0.585122	1.22261	1	6	721	5289	FGRRES_13127,	1
microbody lumen	GO:0031907	6	0.585122	1.22261	1	6	721	5289	FGRRES_00407,	1
barrier septum	GO:0000935	4	0.585122	1.22261	1	6	721	5289	FGRRES_01891_M,	1
ATPase complex	GO:1904949	4	0.585122	1.22261	1	6	721	5289	FGRRES_06922,	1
peroxisomal matrix	GO:0005782	7	0.585122	1.22261	1	6	721	5289	FGRRES_00407,	1
UTP-C complex	GO:0034456	4	0.585122	1.22261	1	6	721	5289	FGRRES_16299,	1
membrane region	GO:0098589	3	0.587833	1.04795	2	14	721	5289	FGRRES_00497,FGRRES_11208,	1
cellular bud tip	GO:0005934	4	0.605938	0.965216	5	38	721	5289	FGRRES_01854,FGRRES_16146,FGRRES_10272,FGRRES_06149,FGRRES_01891_M,	1
cellular bud	GO:0005933	3	0.606248	0.96062	11	84	721	5289	FGRRES_11029,FGRRES_16701,FGRRES_16733,FGRRES_01854,FGRRES_16146,FGRRES_10272,FGRRES_06149,FGRRES_07218,FGRRES_00444,FGRRES_04370,FGRRES_01891_M,	1
nuclear ubiquitin ligase complex	GO:0000152	5	0.624789	0.956823	3	23	721	5289	FGRRES_00660,FGRRES_10728,FGRRES_06922,	1
nuclear periphery	GO:0034399	5	0.626622	0.946535	4	31	721	5289	FGRRES_01854,FGRRES_01863,FGRRES_09025,FGRRES_02233,	1
nucleotide-excision repair factor 3 complex	GO:0000112	5	0.641743	1.04795	1	7	721	5289	FGRRES_04308,	1
transcriptionally active chromatin	GO:0035327	6	0.641743	1.04795	1	7	721	5289	FGRRES_06948,	1
CORVET complex	GO:0033263	4	0.641743	1.04795	1	7	721	5289	FGRRES_01874,	1
membrane microdomain	GO:0098857	4	0.641743	1.04795	1	7	721	5289	FGRRES_11208,	1
core TFIIH complex	GO:0000439	4	0.641743	1.04795	1	7	721	5289	FGRRES_04308,	1
membrane raft	GO:0045121	5	0.641743	1.04795	1	7	721	5289	FGRRES_11208,	1
Rpd3L complex	GO:0033698	8	0.641743	1.04795	1	7	721	5289	FGRRES_00297,	1
nuclear subtelomeric heterochromatin	GO:1990707	8	0.641743	1.04795	1	7	721	5289	FGRRES_00348,	1
nuclear SCF ubiquitin ligase complex	GO:0043224	6	0.641743	1.04795	1	7	721	5289	FGRRES_06922,	1
U6 snRNP	GO:0005688	7	0.641743	1.04795	1	7	721	5289	FGRRES_17287_M,	1
gamma-tubulin complex	GO:0000930	4	0.641743	1.04795	1	7	721	5289	FGRRES_06364,	1
subtelomeric heterochromatin	GO:1990421	7	0.641743	1.04795	1	7	721	5289	FGRRES_00348,	1
Sin3-type complex	GO:0070822	7	0.641743	1.04795	1	7	721	5289	FGRRES_00297,	1
integral component of Golgi membrane	GO:0030173	6	0.652841	0.916956	5	40	721	5289	FGRRES_09255,FGRRES_06856,FGRRES_04278,FGRRES_02714,FGRRES_08935,	1
intrinsic component of Golgi membrane	GO:0031228	5	0.652841	0.916956	5	40	721	5289	FGRRES_09255,FGRRES_06856,FGRRES_04278,FGRRES_02714,FGRRES_08935,	1
nuclear chromosome, telomeric region	GO:0000784	7	0.654376	0.916956	3	24	721	5289	FGRRES_12711,FGRRES_04887,FGRRES_06721,	1
outer membrane	GO:0019867	3	0.657112	0.916956	7	56	721	5289	FGRRES_13127,FGRRES_12821,FGRRES_03554,FGRRES_02783,FGRRES_08694,FGRRES_07588,FGRRES_05154,	1
nuclear pericentric heterochromatin	GO:0031618	8	0.662469	0.916956	2	16	721	5289	FGRRES_00348,FGRRES_09025,	1
extrinsic component of mitochondrial inner membrane	GO:0031314	5	0.662469	0.916956	2	16	721	5289	FGRRES_10933,FGRRES_12693,	1
pericentric heterochromatin	GO:0005721	7	0.662469	0.916956	2	16	721	5289	FGRRES_00348,FGRRES_09025,	1
U1 snRNP	GO:0005685	7	0.662469	0.916956	2	16	721	5289	FGRRES_05737_M,FGRRES_04286,	1
lytic vacuole membrane	GO:0098852	7	0.670049	0.924661	15	119	721	5289	FGRRES_07832,FGRRES_16723,FGRRES_06685_M,FGRRES_04178,FGRRES_01006,FGRRES_10243,FGRRES_06542_M,FGRRES_00371,FGRRES_02400,FGRRES_09723,FGRRES_04370,FGRRES_09952,FGRRES_01606,FGRRES_15855_M,FGRRES_05547,	1
fungal-type vacuole membrane	GO:0000329	8	0.670049	0.924661	15	119	721	5289	FGRRES_07832,FGRRES_16723,FGRRES_06685_M,FGRRES_04178,FGRRES_01006,FGRRES_10243,FGRRES_06542_M,FGRRES_00371,FGRRES_02400,FGRRES_09723,FGRRES_04370,FGRRES_09952,FGRRES_01606,FGRRES_15855_M,FGRRES_05547,	1
mediator complex	GO:0016592	4	0.682251	0.880277	3	25	721	5289	FGRRES_10148,FGRRES_06573,FGRRES_01279,	1
replication compartment	GO:0046809	6	0.682251	0.880277	3	25	721	5289	FGRRES_06922,FGRRES_05187_M,FGRRES_09520,	1
host cell	GO:0043657	4	0.682251	0.880277	3	25	721	5289	FGRRES_06922,FGRRES_05187_M,FGRRES_09520,	1
intracellular region of host	GO:0043656	4	0.682251	0.880277	3	25	721	5289	FGRRES_06922,FGRRES_05187_M,FGRRES_09520,	1
host	GO:0018995	3	0.682251	0.880277	3	25	721	5289	FGRRES_06922,FGRRES_05187_M,FGRRES_09520,	1
host intracellular membrane-bounded organelle	GO:0033648	6	0.682251	0.880277	3	25	721	5289	FGRRES_06922,FGRRES_05187_M,FGRRES_09520,	1
host cell part	GO:0033643	3	0.682251	0.880277	3	25	721	5289	FGRRES_06922,FGRRES_05187_M,FGRRES_09520,	1
host intracellular part	GO:0033646	4	0.682251	0.880277	3	25	721	5289	FGRRES_06922,FGRRES_05187_M,FGRRES_09520,	1
host intracellular organelle	GO:0033647	5	0.682251	0.880277	3	25	721	5289	FGRRES_06922,FGRRES_05187_M,FGRRES_09520,	1
other organism cell	GO:0044216	3	0.682251	0.880277	3	25	721	5289	FGRRES_06922,FGRRES_05187_M,FGRRES_09520,	1
other organism part	GO:0044217	2	0.682251	0.880277	3	25	721	5289	FGRRES_06922,FGRRES_05187_M,FGRRES_09520,	1
host cell nucleus	GO:0042025	7	0.682251	0.880277	3	25	721	5289	FGRRES_06922,FGRRES_05187_M,FGRRES_09520,	1
other organism	GO:0044215	2	0.682251	0.880277	3	25	721	5289	FGRRES_06922,FGRRES_05187_M,FGRRES_09520,	1
viral factory	GO:0039713	4	0.682251	0.880277	3	25	721	5289	FGRRES_06922,FGRRES_05187_M,FGRRES_09520,	1
nuclear viral factory	GO:0039715	5	0.682251	0.880277	3	25	721	5289	FGRRES_06922,FGRRES_05187_M,FGRRES_09520,	1
proton-transporting V-type ATPase, V0 domain	GO:0033179	6	0.690645	0.916956	1	8	721	5289	FGRRES_16433_M,	1
RNA-directed RNA polymerase complex	GO:0031379	5	0.690645	0.916956	1	8	721	5289	FGRRES_04619,	1
COPII vesicle coat	GO:0030127	7	0.690645	0.916956	1	8	721	5289	FGRRES_01276,	1
transcriptional repressor complex	GO:0017053	3	0.690645	0.916956	1	8	721	5289	FGRRES_16007,	1
septin ring	GO:0005940	7	0.690645	0.916956	1	8	721	5289	FGRRES_07218,	1
late endosome membrane	GO:0031902	8	0.690645	0.916956	1	8	721	5289	FGRRES_11208,	1
actin cytoskeleton	GO:0015629	6	0.694506	0.889169	8	66	721	5289	FGRRES_10753,FGRRES_08485,FGRRES_15914_M,FGRRES_07284,FGRRES_01964,FGRRES_01923,FGRRES_10048,FGRRES_09982,	1
prospore membrane	GO:0005628	3	0.695515	0.863017	2	17	721	5289	FGRRES_00497,FGRRES_05890,	1
transporter complex	GO:1990351	3	0.708417	0.846421	3	26	721	5289	FGRRES_01364,FGRRES_11939,FGRRES_05160,	1
endoplasmic reticulum	GO:0005783	5	0.718091	0.939104	53	414	721	5289	FGRRES_00298,FGRRES_16293,FGRRES_02527,FGRRES_02522,FGRRES_09255,FGRRES_07180_M,FGRRES_09297,FGRRES_08623_M,FGRRES_16733,FGRRES_06685_M,FGRRES_04102,FGRRES_11079_M,FGRRES_08830,FGRRES_01006,FGRRES_06856,FGRRES_02400,FGRRES_10223,FGRRES_12821,FGRRES_09723,FGRRES_01364,FGRRES_01349,FGRRES_15729_M,FGRRES_06024,FGRRES_16433_M,FGRRES_07183,FGRRES_10175,FGRRES_06513,FGRRES_03844,FGRRES_03847,FGRRES_027…	1
extrinsic component of vacuolar membrane	GO:0000306	5	0.73288	0.815072	1	9	721	5289	FGRRES_05547,	1
phosphatidylinositol 3-kinase complex, class III	GO:0035032	4	0.73288	0.815072	1	9	721	5289	FGRRES_10243,	1
phosphatidylinositol 3-kinase complex	GO:0005942	3	0.73288	0.815072	1	9	721	5289	FGRRES_10243,	1
mating-type region heterochromatin	GO:0031934	7	0.73288	0.815072	1	9	721	5289	FGRRES_00348,	1
trans-Golgi network transport vesicle membrane	GO:0012510	7	0.73288	0.815072	1	9	721	5289	FGRRES_15855_M,	1
DNA polymerase complex	GO:0042575	4	0.732897	0.815072	3	27	721	5289	FGRRES_00621,FGRRES_15847,FGRRES_01052,	1
ascospore-type prospore	GO:0042764	4	0.753564	0.772173	2	19	721	5289	FGRRES_00497,FGRRES_05890,	1
intracellular immature spore	GO:0042763	3	0.753564	0.772173	2	19	721	5289	FGRRES_00497,FGRRES_05890,	1
vacuolar part	GO:0044437	5	0.755073	0.875898	16	134	721	5289	FGRRES_07832,FGRRES_16723,FGRRES_06685_M,FGRRES_04178,FGRRES_01006,FGRRES_10243,FGRRES_06542_M,FGRRES_00371,FGRRES_02400,FGRRES_09723,FGRRES_04370,FGRRES_09952,FGRRES_01606,FGRRES_15855_M,FGRRES_05547,FGRRES_00017,	1
incipient cellular bud site	GO:0000131	4	0.762558	0.793043	4	37	721	5289	FGRRES_16146,FGRRES_06149,FGRRES_07218,FGRRES_01891_M,	1
chaperone complex	GO:0101031	4	0.769356	0.733564	1	10	721	5289	FGRRES_09952,	1
spindle midzone	GO:0051233	5	0.769356	0.733564	1	10	721	5289	FGRRES_15772,	1
DASH complex	GO:0042729	6	0.769356	0.733564	1	10	721	5289	FGRRES_00325,	1
trans-Golgi network transport vesicle	GO:0030140	7	0.769356	0.733564	1	10	721	5289	FGRRES_15855_M,	1
septin cytoskeleton	GO:0032156	6	0.769356	0.733564	1	10	721	5289	FGRRES_07218,	1
holo TFIIH complex	GO:0005675	5	0.769356	0.733564	1	10	721	5289	FGRRES_04308,	1
chromosome, centromeric core domain	GO:0034506	6	0.769356	0.733564	1	10	721	5289	FGRRES_07020,	1
endoplasmic reticulum-Golgi intermediate compartment	GO:0005793	5	0.769356	0.733564	1	10	721	5289	FGRRES_01276,	1
histone deacetylase complex	GO:0000118	6	0.778838	0.733564	2	20	721	5289	FGRRES_00297,FGRRES_16007,	1
integral component of mitochondrial inner membrane	GO:0031305	7	0.778838	0.733564	2	20	721	5289	FGRRES_09261,FGRRES_06298,	1
methyltransferase complex	GO:0034708	4	0.778838	0.733564	2	20	721	5289	FGRRES_05413,FGRRES_09564,	1
mRNA cleavage factor complex	GO:0005849	4	0.778838	0.733564	2	20	721	5289	FGRRES_10795,FGRRES_05413,	1
vacuolar membrane	GO:0005774	6	0.785475	0.852982	15	129	721	5289	FGRRES_07832,FGRRES_16723,FGRRES_06685_M,FGRRES_04178,FGRRES_01006,FGRRES_10243,FGRRES_06542_M,FGRRES_00371,FGRRES_02400,FGRRES_09723,FGRRES_04370,FGRRES_09952,FGRRES_01606,FGRRES_15855_M,FGRRES_05547,	1
mating projection tip	GO:0043332	4	0.787223	0.780388	5	47	721	5289	FGRRES_06149,FGRRES_16633,FGRRES_10967,FGRRES_10048,FGRRES_01891_M,	1
chromosomal region	GO:0098687	5	0.796659	0.836521	13	114	721	5289	FGRRES_16767,FGRRES_00325,FGRRES_00348,FGRRES_01699_M,FGRRES_06922,FGRRES_09025,FGRRES_01551,FGRRES_12711,FGRRES_04887,FGRRES_00280_M,FGRRES_06721,FGRRES_01157,FGRRES_07020,	1
condensed chromosome outer kinetochore	GO:0000940	4	0.800857	0.666877	1	11	721	5289	FGRRES_00325,	1
condensed nuclear chromosome outer kinetochore	GO:0000942	5	0.800857	0.666877	1	11	721	5289	FGRRES_00325,	1
transport vesicle membrane	GO:0030658	6	0.801812	0.698633	2	21	721	5289	FGRRES_01276,FGRRES_15855_M,	1
DNA helicase complex	GO:0033202	4	0.801812	0.698633	2	21	721	5289	FGRRES_02026,FGRRES_06922,	1
intrinsic component of mitochondrial inner membrane	GO:0031304	6	0.801812	0.698633	2	21	721	5289	FGRRES_09261,FGRRES_06298,	1
actin cortical patch	GO:0030479	5	0.814415	0.733564	4	40	721	5289	FGRRES_08485,FGRRES_01923,FGRRES_10048,FGRRES_09982,	1
extrinsic component of organelle membrane	GO:0031312	4	0.814867	0.709901	3	31	721	5289	FGRRES_10933,FGRRES_12693,FGRRES_05547,	1
endoplasmic reticulum subcompartment	GO:0098827	5	0.820358	0.851097	21	181	721	5289	FGRRES_02527,FGRRES_02522,FGRRES_09255,FGRRES_16733,FGRRES_06685_M,FGRRES_04102,FGRRES_08830,FGRRES_10223,FGRRES_15729_M,FGRRES_06024,FGRRES_09863,FGRRES_01276,FGRRES_02232,FGRRES_01606,FGRRES_00538,FGRRES_06688,FGRRES_16825,FGRRES_08531,FGRRES_07412,FGRRES_05164,FGRRES_08935,	1
serine/threonine protein kinase complex	GO:1902554	7	0.822642	0.666877	2	22	721	5289	FGRRES_04308,FGRRES_05630_M,	1
chromosome, centromeric region	GO:0000775	6	0.827212	0.785962	9	84	721	5289	FGRRES_16767,FGRRES_00325,FGRRES_00348,FGRRES_06922,FGRRES_09025,FGRRES_01551,FGRRES_00280_M,FGRRES_01157,FGRRES_07020,	1
cyclin-dependent protein kinase holoenzyme complex	GO:0000307	4	0.828061	0.611304	1	12	721	5289	FGRRES_05630_M,	1
DNA-directed RNA polymerase I complex	GO:0005736	6	0.828061	0.611304	1	12	721	5289	FGRRES_00365,	1
ER to Golgi transport vesicle membrane	GO:0012507	7	0.828061	0.611304	1	12	721	5289	FGRRES_01276,	1
endocytic patch	GO:0061645	6	0.829497	0.715673	4	41	721	5289	FGRRES_08485,FGRRES_01923,FGRRES_10048,FGRRES_09982,	1
plasma membrane bounded cell projection part	GO:0120038	4	0.830814	0.733564	5	50	721	5289	FGRRES_06149,FGRRES_16633,FGRRES_10967,FGRRES_10048,FGRRES_01891_M,	1
cell projection part	GO:0044463	3	0.830814	0.733564	5	50	721	5289	FGRRES_06149,FGRRES_16633,FGRRES_10967,FGRRES_10048,FGRRES_01891_M,	1
endosome membrane	GO:0010008	7	0.831681	0.687717	3	32	721	5289	FGRRES_10272,FGRRES_06542_M,FGRRES_11208,	1
endoplasmic reticulum membrane	GO:0005789	3	0.835352	0.838359	20	175	721	5289	FGRRES_02527,FGRRES_02522,FGRRES_09255,FGRRES_06685_M,FGRRES_04102,FGRRES_08830,FGRRES_10223,FGRRES_15729_M,FGRRES_06024,FGRRES_09863,FGRRES_01276,FGRRES_02232,FGRRES_01606,FGRRES_00538,FGRRES_06688,FGRRES_16825,FGRRES_08531,FGRRES_07412,FGRRES_05164,FGRRES_08935,	1
cell cortex of cell tip	GO:0051285	8	0.841486	0.637882	2	23	721	5289	FGRRES_16146,FGRRES_08537,	1
site of polarized growth	GO:0030427	3	0.845643	0.793043	12	111	721	5289	FGRRES_16701,FGRRES_01854,FGRRES_16146,FGRRES_10272,FGRRES_06149,FGRRES_16633,FGRRES_07218,FGRRES_10967,FGRRES_00444,FGRRES_04068_M,FGRRES_10048,FGRRES_01891_M,	1
spindle	GO:0005819	5	0.845673	0.733564	6	60	721	5289	FGRRES_00270,FGRRES_01870,FGRRES_00325,FGRRES_09520,FGRRES_11093,FGRRES_15772,	1
cellular bud neck	GO:0005935	4	0.848822	0.744196	7	69	721	5289	FGRRES_16701,FGRRES_01854,FGRRES_16146,FGRRES_06149,FGRRES_07218,FGRRES_00444,FGRRES_01891_M,	1
carboxy-terminal domain protein kinase complex	GO:0032806	4	0.851553	0.56428	1	13	721	5289	FGRRES_04308,	1
nucleosome	GO:0000786	4	0.851553	0.56428	1	13	721	5289	FGRRES_07553,	1
cis-Golgi network	GO:0005801	5	0.851553	0.56428	1	13	721	5289	FGRRES_06856,	1
tubulin complex	GO:0045298	4	0.8614	0.647263	3	34	721	5289	FGRRES_06149,FGRRES_00510,FGRRES_15772,	1
mating projection	GO:0005937	5	0.86685	0.692042	5	53	721	5289	FGRRES_06149,FGRRES_16633,FGRRES_10967,FGRRES_10048,FGRRES_01891_M,	1
clathrin-coated vesicle membrane	GO:0030665	7	0.87184	0.523975	1	14	721	5289	FGRRES_15855_M,	1
SCF ubiquitin ligase complex	GO:0019005	6	0.87184	0.523975	1	14	721	5289	FGRRES_06922,	1
Ino80 complex	GO:0031011	5	0.87184	0.523975	1	14	721	5289	FGRRES_02026,	1
DNA-directed RNA polymerase III complex	GO:0005666	6	0.87184	0.523975	1	14	721	5289	FGRRES_00365,	1
respiratory chain complex	GO:0098803	5	0.873821	0.586852	2	25	721	5289	FGRRES_13137,FGRRES_01981,	1
nuclear heterochromatin	GO:0005720	7	0.873821	0.586852	2	25	721	5289	FGRRES_00348,FGRRES_09025,	1
plasma membrane bounded cell projection	GO:0120025	4	0.87733	0.679226	5	54	721	5289	FGRRES_06149,FGRRES_16633,FGRRES_10967,FGRRES_10048,FGRRES_01891_M,	1
mitochondrial outer membrane	GO:0005741	5	0.87733	0.679226	5	54	721	5289	FGRRES_13127,FGRRES_12821,FGRRES_02783,FGRRES_08694,FGRRES_05154,	1
organelle outer membrane	GO:0031968	4	0.87733	0.679226	5	54	721	5289	FGRRES_13127,FGRRES_12821,FGRRES_02783,FGRRES_08694,FGRRES_05154,	1
small nuclear ribonucleoprotein complex	GO:0030532	5	0.879962	0.652057	4	45	721	5289	FGRRES_17287_M,FGRRES_01010,FGRRES_05737_M,FGRRES_04286,	1
spliceosomal snRNP complex	GO:0097525	6	0.879962	0.652057	4	45	721	5289	FGRRES_17287_M,FGRRES_01010,FGRRES_05737_M,FGRRES_04286,	1
mitochondrial intermembrane space	GO:0005758	5	0.879962	0.652057	4	45	721	5289	FGRRES_09639,FGRRES_08386,FGRRES_09833,FGRRES_01245,	1
Golgi apparatus	GO:0005794	5	0.880937	0.839133	31	271	721	5289	FGRRES_00257,FGRRES_09255,FGRRES_07832,FGRRES_09297,FGRRES_11467,FGRRES_07929,FGRRES_01006,FGRRES_06856,FGRRES_10272,FGRRES_06542_M,FGRRES_05809,FGRRES_00325,FGRRES_09723,FGRRES_04278,FGRRES_10145,FGRRES_02714,FGRRES_01276,FGRRES_04319,FGRRES_02232,FGRRES_10418,FGRRES_17491,FGRRES_02698,FGRRES_00538,FGRRES_07076,FGRRES_15855_M,FGRRES_08531,FGRRES_08537,FGRRES_05143,FGRRES_05154,FGRRES_08935,FGRRE…	1
cell tip	GO:0051286	3	0.884821	0.740974	10	99	721	5289	FGRRES_06206,FGRRES_16146,FGRRES_16633,FGRRES_08667,FGRRES_01243,FGRRES_04068_M,FGRRES_09982,FGRRES_01891_M,FGRRES_04042,FGRRES_08537,	1
cytoplasmic vesicle membrane	GO:0030659	5	0.886411	0.611304	3	36	721	5289	FGRRES_01276,FGRRES_15855_M,FGRRES_08537,	1
cullin-RING ubiquitin ligase complex	GO:0031461	5	0.886411	0.611304	3	36	721	5289	FGRRES_00660,FGRRES_10728,FGRRES_06922,	1
vesicle membrane	GO:0012506	4	0.886411	0.611304	3	36	721	5289	FGRRES_01276,FGRRES_15855_M,FGRRES_08537,	1
cell projection	GO:0042995	3	0.8871	0.666877	5	55	721	5289	FGRRES_06149,FGRRES_16633,FGRRES_10967,FGRRES_10048,FGRRES_01891_M,	1
proteasome complex	GO:0000502	4	0.8871	0.666877	5	55	721	5289	FGRRES_16733,FGRRES_01863,FGRRES_04288,FGRRES_00182,FGRRES_01098,	1
cortical actin cytoskeleton	GO:0030864	7	0.8871	0.666877	5	55	721	5289	FGRRES_08485,FGRRES_07284,FGRRES_01923,FGRRES_10048,FGRRES_09982,	1
growing cell tip	GO:0035838	4	0.889357	0.489043	1	15	721	5289	FGRRES_01891_M,	1
transcription elongation factor complex	GO:0008023	4	0.889357	0.489043	1	15	721	5289	FGRRES_06948,	1
microbody	GO:0042579	5	0.89035	0.637882	4	46	721	5289	FGRRES_04126,FGRRES_01419,FGRRES_09896,FGRRES_00407,	1
peroxisome	GO:0005777	6	0.89035	0.637882	4	46	721	5289	FGRRES_04126,FGRRES_01419,FGRRES_09896,FGRRES_00407,	1
extrinsic component of membrane	GO:0019898	3	0.894664	0.677136	6	65	721	5289	FGRRES_10243,FGRRES_10272,FGRRES_07235,FGRRES_10933,FGRRES_12693,FGRRES_05547,	1
transcription factor complex	GO:0005667	4	0.894745	0.769473	15	143	721	5289	FGRRES_16912_M,FGRRES_09279,FGRRES_07310,FGRRES_04308,FGRRES_13517,FGRRES_10179,FGRRES_11657,FGRRES_12345,FGRRES_12344,FGRRES_13838,FGRRES_06664,FGRRES_10868,FGRRES_07076,FGRRES_03281,FGRRES_15782,	1
endopeptidase complex	GO:1905369	5	0.896195	0.654968	5	56	721	5289	FGRRES_16733,FGRRES_01863,FGRRES_04288,FGRRES_00182,FGRRES_01098,	1
respiratory chain	GO:0070469	3	0.899982	0.543381	2	27	721	5289	FGRRES_13137,FGRRES_01981,	1
SLIK (SAGA-like) complex	GO:0046695	7	0.904483	0.458478	1	16	721	5289	FGRRES_00280_M,	1
integral component of mitochondrial outer membrane	GO:0031307	7	0.904483	0.458478	1	16	721	5289	FGRRES_08694,	1
intrinsic component of mitochondrial outer membrane	GO:0031306	6	0.904483	0.458478	1	16	721	5289	FGRRES_08694,	1
outer mitochondrial membrane protein complex	GO:0098799	4	0.904483	0.458478	1	16	721	5289	FGRRES_13127,	1
proteasome core complex	GO:0005839	4	0.904483	0.458478	1	16	721	5289	FGRRES_16733,	1
transferase complex, transferring phosphorus-containing groups	GO:0061695	5	0.906684	0.76979	17	162	721	5289	FGRRES_04619,FGRRES_00621,FGRRES_10243,FGRRES_00365,FGRRES_10606,FGRRES_02449,FGRRES_04308,FGRRES_00737,FGRRES_06948,FGRRES_07623,FGRRES_15847,FGRRES_00856,FGRRES_05630_M,FGRRES_10042,FGRRES_01052,FGRRES_08540,FGRRES_07493,	1
endosomal part	GO:0044440	6	0.908789	0.611304	4	48	721	5289	FGRRES_10272,FGRRES_06542_M,FGRRES_01874,FGRRES_11208,	1
replication fork	GO:0005657	5	0.909321	0.690414	8	85	721	5289	FGRRES_01007,FGRRES_06874,FGRRES_05453_M,FGRRES_02752,FGRRES_12711,FGRRES_09520,FGRRES_01052,FGRRES_06721,	1
Golgi-associated vesicle membrane	GO:0030660	6	0.911078	0.523975	2	28	721	5289	FGRRES_01276,FGRRES_15855_M,	1
nuclear pore	GO:0005643	4	0.916401	0.56428	3	39	721	5289	FGRRES_01324,FGRRES_09025,FGRRES_02233,	1
organelle envelope lumen	GO:0031970	4	0.916933	0.598828	4	49	721	5289	FGRRES_09639,FGRRES_08386,FGRRES_09833,FGRRES_01245,	1
H4 histone acetyltransferase complex	GO:1902562	6	0.917543	0.431509	1	17	721	5289	FGRRES_00280_M,	1
proton-transporting two-sector ATPase complex, proton-transporting domain	GO:0033177	5	0.917543	0.431509	1	17	721	5289	FGRRES_16433_M,	1
U2 snRNP	GO:0005686	7	0.917543	0.431509	1	17	721	5289	FGRRES_01010,	1
trans-Golgi network	GO:0005802	6	0.917543	0.431509	1	17	721	5289	FGRRES_10145,	1
COPII-coated ER to Golgi transport vesicle	GO:0030134	7	0.921013	0.505907	2	29	721	5289	FGRRES_01276,FGRRES_00538,	1
transport vesicle	GO:0030133	6	0.921013	0.505907	2	29	721	5289	FGRRES_01276,FGRRES_15855_M,	1
nuclear outer membrane-endoplasmic reticulum membrane network	GO:0042175	3	0.923927	0.76813	20	191	721	5289	FGRRES_02527,FGRRES_02522,FGRRES_09255,FGRRES_06685_M,FGRRES_04102,FGRRES_08830,FGRRES_10223,FGRRES_15729_M,FGRRES_06024,FGRRES_09863,FGRRES_01276,FGRRES_02232,FGRRES_01606,FGRRES_00538,FGRRES_06688,FGRRES_16825,FGRRES_08531,FGRRES_07412,FGRRES_05164,FGRRES_08935,	1
integral component of mitochondrial membrane	GO:0032592	6	0.92467	0.550173	3	40	721	5289	FGRRES_09261,FGRRES_06298,FGRRES_08694,	1
endoplasmic reticulum part	GO:0044432	5	0.92639	0.770243	21	200	721	5289	FGRRES_02527,FGRRES_02522,FGRRES_09255,FGRRES_16733,FGRRES_06685_M,FGRRES_04102,FGRRES_08830,FGRRES_10223,FGRRES_15729_M,FGRRES_06024,FGRRES_09863,FGRRES_01276,FGRRES_02232,FGRRES_01606,FGRRES_00538,FGRRES_06688,FGRRES_16825,FGRRES_08531,FGRRES_07412,FGRRES_05164,FGRRES_08935,	1
nuclear replication fork	GO:0043596	6	0.92651	0.611304	5	60	721	5289	FGRRES_01007,FGRRES_06874,FGRRES_05453_M,FGRRES_09520,FGRRES_01052,	1
cortical cytoskeleton	GO:0030863	6	0.92651	0.611304	5	60	721	5289	FGRRES_08485,FGRRES_07284,FGRRES_01923,FGRRES_10048,FGRRES_09982,	1
proton-transporting V-type ATPase complex	GO:0033176	6	0.92882	0.407536	1	18	721	5289	FGRRES_16433_M,	1
DNA packaging complex	GO:0044815	3	0.92882	0.407536	1	18	721	5289	FGRRES_07553,	1
cytosolic small ribosomal subunit	GO:0022627	7	0.92882	0.407536	1	18	721	5289	FGRRES_06353,	1
clathrin-coated vesicle	GO:0030136	7	0.92882	0.407536	1	18	721	5289	FGRRES_15855_M,	1
fungal-type cell wall	GO:0009277	5	0.92882	0.407536	1	18	721	5289	FGRRES_15729_M,	1
transferase complex	GO:1990234	4	0.928837	0.819866	38	340	721	5289	FGRRES_09638,FGRRES_00660,FGRRES_10728,FGRRES_09255,FGRRES_04102,FGRRES_04619,FGRRES_00621,FGRRES_06856,FGRRES_10243,FGRRES_10272,FGRRES_07946,FGRRES_00365,FGRRES_10606,FGRRES_02449,FGRRES_04309,FGRRES_04308,FGRRES_04278,FGRRES_13550,FGRRES_00737,FGRRES_06922,FGRRES_06948,FGRRES_02714,FGRRES_07623,FGRRES_10933,FGRRES_05413,FGRRES_15847,FGRRES_00856,FGRRES_09564,FGRRES_00280_M,FGRRES_05630_M,FGRRE…	1
heterochromatin	GO:0000792	6	0.929896	0.489043	2	30	721	5289	FGRRES_00348,FGRRES_09025,	1
intrinsic component of mitochondrial membrane	GO:0098573	5	0.932183	0.536755	3	41	721	5289	FGRRES_09261,FGRRES_06298,FGRRES_08694,	1
intrinsic component of organelle membrane	GO:0031300	4	0.932188	0.673682	9	98	721	5289	FGRRES_09261,FGRRES_06298,FGRRES_09255,FGRRES_06856,FGRRES_04278,FGRRES_02714,FGRRES_08694,FGRRES_09952,FGRRES_08935,	1
nucleolar part	GO:0044452	5	0.932739	0.601282	5	61	721	5289	FGRRES_16299,FGRRES_00270,FGRRES_01870,FGRRES_00365,FGRRES_11603,	1
cytosolic part	GO:0044445	5	0.936924	0.666877	9	99	721	5289	FGRRES_06353,FGRRES_01346,FGRRES_15680_M,FGRRES_11656,FGRRES_05957,FGRRES_05409,FGRRES_10853,FGRRES_05174,FGRRES_09589,	1
90S preribosome	GO:0030686	6	0.937604	0.56428	4	52	721	5289	FGRRES_16299,FGRRES_00270,FGRRES_01870,FGRRES_11603,	1
SAGA-type complex	GO:0070461	6	0.938556	0.386087	1	19	721	5289	FGRRES_00280_M,	1
SAGA complex	GO:0000124	7	0.938556	0.386087	1	19	721	5289	FGRRES_00280_M,	1
DNA replication preinitiation complex	GO:0031261	4	0.938556	0.386087	1	19	721	5289	FGRRES_01007,	1
INO80-type complex	GO:0097346	5	0.938556	0.386087	1	19	721	5289	FGRRES_02026,	1
small-subunit processome	GO:0032040	6	0.939002	0.523975	3	42	721	5289	FGRRES_00270,FGRRES_05687,FGRRES_01870,	1
site of double-strand break	GO:0035861	6	0.944906	0.458478	2	32	721	5289	FGRRES_01699_M,FGRRES_09520,	1
site of DNA damage	GO:0090734	5	0.944906	0.458478	2	32	721	5289	FGRRES_01699_M,FGRRES_09520,	1
Golgi membrane	GO:0000139	6	0.945429	0.60293	6	73	721	5289	FGRRES_09255,FGRRES_06856,FGRRES_06542_M,FGRRES_04278,FGRRES_02714,FGRRES_08935,	1
polysome	GO:0005844	5	0.946963	0.366782	1	20	721	5289	FGRRES_08532,	1
ubiquitin ligase complex	GO:0000151	4	0.948664	0.543381	4	54	721	5289	FGRRES_00660,FGRRES_10728,FGRRES_10272,FGRRES_06922,	1
nuclear envelope	GO:0005635	5	0.949021	0.660869	10	111	721	5289	FGRRES_00271,FGRRES_01854,FGRRES_09339,FGRRES_01324,FGRRES_09025,FGRRES_09408,FGRRES_12711,FGRRES_04350,FGRRES_02233,FGRRES_01157,	1
coated vesicle membrane	GO:0030662	6	0.951211	0.444585	2	33	721	5289	FGRRES_01276,FGRRES_15855_M,	1
cell cortex part	GO:0044448	5	0.952573	0.654968	10	112	721	5289	FGRRES_08485,FGRRES_16733,FGRRES_16146,FGRRES_07284,FGRRES_07218,FGRRES_01923,FGRRES_10048,FGRRES_09982,FGRRES_08531,FGRRES_08537,	1
nucleotide-excision repair complex	GO:0000109	4	0.95422	0.349316	1	21	721	5289	FGRRES_04308,	1
contractile ring	GO:0070938	3	0.95422	0.349316	1	21	721	5289	FGRRES_07284,	1
actomyosin contractile ring	GO:0005826	4	0.95422	0.349316	1	21	721	5289	FGRRES_07284,	1
late endosome	GO:0005770	7	0.95422	0.349316	1	21	721	5289	FGRRES_11208,	1
integral component of organelle membrane	GO:0031301	5	0.957576	0.617739	8	95	721	5289	FGRRES_09261,FGRRES_06298,FGRRES_09255,FGRRES_06856,FGRRES_04278,FGRRES_02714,FGRRES_08694,FGRRES_08935,	1
integral component of endoplasmic reticulum membrane	GO:0030176	5	0.9579	0.523975	4	56	721	5289	FGRRES_09255,FGRRES_09863,FGRRES_02232,FGRRES_08531,	1
intrinsic component of endoplasmic reticulum membrane	GO:0031227	4	0.9579	0.523975	4	56	721	5289	FGRRES_09255,FGRRES_09863,FGRRES_02232,FGRRES_08531,	1
organelle subcompartment	GO:0031984	4	0.958397	0.753861	26	253	721	5289	FGRRES_02527,FGRRES_02522,FGRRES_09255,FGRRES_16733,FGRRES_06685_M,FGRRES_04102,FGRRES_08830,FGRRES_06856,FGRRES_06542_M,FGRRES_10223,FGRRES_04278,FGRRES_15729_M,FGRRES_06024,FGRRES_10145,FGRRES_02714,FGRRES_09863,FGRRES_01276,FGRRES_02232,FGRRES_01606,FGRRES_00538,FGRRES_06688,FGRRES_16825,FGRRES_08531,FGRRES_07412,FGRRES_05164,FGRRES_08935,	1
cell cortex	GO:0005938	6	0.964198	0.645537	11	125	721	5289	FGRRES_08485,FGRRES_16733,FGRRES_16146,FGRRES_07284,FGRRES_07218,FGRRES_10111,FGRRES_01923,FGRRES_10048,FGRRES_09982,FGRRES_08531,FGRRES_08537,	1
cytoplasmic region	GO:0099568	5	0.964198	0.645537	11	125	721	5289	FGRRES_08485,FGRRES_16733,FGRRES_16146,FGRRES_07284,FGRRES_07218,FGRRES_10111,FGRRES_01923,FGRRES_10048,FGRRES_09982,FGRRES_08531,FGRRES_08537,	1
cytoplasmic vesicle part	GO:0044433	5	0.965499	0.583517	7	88	721	5289	FGRRES_10272,FGRRES_06542_M,FGRRES_01874,FGRRES_11208,FGRRES_01276,FGRRES_15855_M,FGRRES_08537,	1
small nucleolar ribonucleoprotein complex	GO:0005732	5	0.965895	0.318941	1	23	721	5289	FGRRES_01870,	1
P-body	GO:0000932	7	0.965895	0.318941	1	23	721	5289	FGRRES_05737_M,	1
spindle microtubule	GO:0005876	7	0.965895	0.318941	1	23	721	5289	FGRRES_15772,	1
peptidase complex	GO:1905368	4	0.96775	0.557138	6	79	721	5289	FGRRES_16733,FGRRES_01863,FGRRES_04288,FGRRES_00182,FGRRES_00280_M,FGRRES_01098,	1
cell cortex region	GO:0099738	7	0.97019	0.396521	2	37	721	5289	FGRRES_16146,FGRRES_08537,	1
catalytic complex	GO:1902494	3	0.970292	0.826031	67	595	721	5289	FGRRES_09638,FGRRES_00297,FGRRES_13137,FGRRES_05733,FGRRES_00660,FGRRES_10728,FGRRES_09255,FGRRES_06127_M,FGRRES_17337,FGRRES_16733,FGRRES_04102,FGRRES_04619,FGRRES_00621,FGRRES_02026,FGRRES_06856,FGRRES_10243,FGRRES_01863,FGRRES_10272,FGRRES_07946,FGRRES_00365,FGRRES_10606,FGRRES_02449,FGRRES_03904,FGRRES_04309,FGRRES_04308,FGRRES_15910,FGRRES_04278,FGRRES_01346,FGRRES_04299,FGRRES_04288,FGRRES_…	1
microbody part	GO:0044438	5	0.970564	0.305652	1	24	721	5289	FGRRES_00407,	1
peroxisomal part	GO:0044439	6	0.970564	0.305652	1	24	721	5289	FGRRES_00407,	1
cytoplasmic stress granule	GO:0010494	7	0.970564	0.305652	1	24	721	5289	FGRRES_05737_M,	1
mitotic spindle pole body	GO:0044732	7	0.971261	0.630407	11	128	721	5289	FGRRES_06364,FGRRES_00660,FGRRES_02476,FGRRES_06948,FGRRES_10100,FGRRES_09408,FGRRES_04378,FGRRES_05630_M,FGRRES_01065,FGRRES_01891_M,FGRRES_15772,	1
cytoskeleton	GO:0005856	5	0.972935	0.745998	30	295	721	5289	FGRRES_10753,FGRRES_06364,FGRRES_08485,FGRRES_00660,FGRRES_00270,FGRRES_16146,FGRRES_15914_M,FGRRES_01870,FGRRES_06149,FGRRES_07284,FGRRES_00325,FGRRES_02476,FGRRES_06948,FGRRES_07218,FGRRES_00497,FGRRES_10100,FGRRES_09408,FGRRES_01964,FGRRES_04378,FGRRES_01923,FGRRES_05630_M,FGRRES_09520,FGRRES_00510,FGRRES_10048,FGRRES_01065,FGRRES_16336,FGRRES_09982,FGRRES_01891_M,FGRRES_11093,FGRRES_15772,	1
Golgi subcompartment	GO:0098791	5	0.973331	0.56428	7	91	721	5289	FGRRES_09255,FGRRES_06856,FGRRES_06542_M,FGRRES_04278,FGRRES_10145,FGRRES_02714,FGRRES_08935,	1
endomembrane system	GO:0012505	3	0.973547	0.841471	85	741	721	5289	FGRRES_00298,FGRRES_16293,FGRRES_02527,FGRRES_02522,FGRRES_00257,FGRRES_00271,FGRRES_09255,FGRRES_07180_M,FGRRES_07832,FGRRES_09297,FGRRES_11467,FGRRES_08623_M,FGRRES_16733,FGRRES_06685_M,FGRRES_04102,FGRRES_11079_M,FGRRES_08830,FGRRES_07929,FGRRES_01006,FGRRES_06856,FGRRES_01854,FGRRES_09339,FGRRES_10272,FGRRES_06542_M,FGRRES_01874,FGRRES_05809,FGRRES_02400,FGRRES_10223,FGRRES_12821,FGRRES_00325…	1
whole membrane	GO:0098805	3	0.974269	0.727965	26	262	721	5289	FGRRES_13127,FGRRES_07832,FGRRES_16723,FGRRES_06685_M,FGRRES_04178,FGRRES_01006,FGRRES_10243,FGRRES_10272,FGRRES_06542_M,FGRRES_00371,FGRRES_02400,FGRRES_12821,FGRRES_09723,FGRRES_13550,FGRRES_00497,FGRRES_11208,FGRRES_02783,FGRRES_04370,FGRRES_08694,FGRRES_01276,FGRRES_09952,FGRRES_01606,FGRRES_10053,FGRRES_15855_M,FGRRES_05154,FGRRES_05547,	1
nuclear membrane	GO:0031965	4	0.974595	0.293426	1	25	721	5289	FGRRES_02233,	1
cytoskeletal part	GO:0044430	4	0.976221	0.736103	29	289	721	5289	FGRRES_06364,FGRRES_08485,FGRRES_00660,FGRRES_00270,FGRRES_16146,FGRRES_15914_M,FGRRES_01870,FGRRES_06149,FGRRES_07284,FGRRES_00325,FGRRES_02476,FGRRES_06948,FGRRES_07218,FGRRES_00497,FGRRES_10100,FGRRES_09408,FGRRES_01964,FGRRES_04378,FGRRES_01923,FGRRES_05630_M,FGRRES_09520,FGRRES_00510,FGRRES_10048,FGRRES_01065,FGRRES_16336,FGRRES_09982,FGRRES_01891_M,FGRRES_11093,FGRRES_15772,	1
phosphatase complex	GO:1903293	4	0.978075	0.28214	1	26	721	5289	FGRRES_05413,	1
protein serine/threonine phosphatase complex	GO:0008287	3	0.978075	0.28214	1	26	721	5289	FGRRES_05413,	1
cell division site	GO:0032153	3	0.979074	0.651093	15	169	721	5289	FGRRES_00660,FGRRES_06206,FGRRES_07284,FGRRES_16633,FGRRES_02476,FGRRES_07218,FGRRES_08667,FGRRES_01243,FGRRES_09952,FGRRES_05630_M,FGRRES_04068_M,FGRRES_09982,FGRRES_01891_M,FGRRES_04042,FGRRES_08537,	1
preribosome, large subunit precursor	GO:0030687	6	0.979522	0.366782	2	40	721	5289	FGRRES_11603,FGRRES_04350,	1
microtubule	GO:0005874	6	0.979733	0.42321	3	52	721	5289	FGRRES_06149,FGRRES_16336,FGRRES_15772,	1
Golgi-associated vesicle	GO:0005798	6	0.981914	0.415225	3	53	721	5289	FGRRES_01276,FGRRES_00538,FGRRES_15855_M,	1
prespliceosome	GO:0071010	6	0.983671	0.261987	1	28	721	5289	FGRRES_05737_M,	1
vesicle coat	GO:0030120	6	0.983671	0.261987	1	28	721	5289	FGRRES_01276,	1
U2-type prespliceosome	GO:0071004	7	0.983671	0.261987	1	28	721	5289	FGRRES_05737_M,	1
DNA repair complex	GO:1990391	3	0.983671	0.261987	1	28	721	5289	FGRRES_04308,	1
cell division site part	GO:0032155	3	0.985996	0.341193	2	43	721	5289	FGRRES_07284,FGRRES_07218,	1
microtubule cytoskeleton	GO:0015630	6	0.986062	0.666877	20	220	721	5289	FGRRES_06364,FGRRES_00660,FGRRES_00270,FGRRES_16146,FGRRES_01870,FGRRES_06149,FGRRES_00325,FGRRES_02476,FGRRES_06948,FGRRES_00497,FGRRES_10100,FGRRES_09408,FGRRES_04378,FGRRES_05630_M,FGRRES_09520,FGRRES_01065,FGRRES_16336,FGRRES_01891_M,FGRRES_11093,FGRRES_15772,	1
spindle pole body	GO:0005816	6	0.986145	0.598828	12	147	721	5289	FGRRES_06364,FGRRES_00660,FGRRES_02476,FGRRES_06948,FGRRES_00497,FGRRES_10100,FGRRES_09408,FGRRES_04378,FGRRES_05630_M,FGRRES_01065,FGRRES_01891_M,FGRRES_15772,	1
coated vesicle	GO:0030135	6	0.988595	0.386087	3	57	721	5289	FGRRES_01276,FGRRES_00538,FGRRES_15855_M,	1
SWI/SNF superfamily-type complex	GO:0070603	4	0.989508	0.236634	1	31	721	5289	FGRRES_02026,	1
supramolecular polymer	GO:0099081	3	0.989851	0.37943	3	58	721	5289	FGRRES_06149,FGRRES_16336,FGRRES_15772,	1
supramolecular complex	GO:0099080	2	0.989851	0.37943	3	58	721	5289	FGRRES_06149,FGRRES_16336,FGRRES_15772,	1
polymeric cytoskeletal fiber	GO:0099513	5	0.989851	0.37943	3	58	721	5289	FGRRES_06149,FGRRES_16336,FGRRES_15772,	1
supramolecular fiber	GO:0099512	4	0.989851	0.37943	3	58	721	5289	FGRRES_06149,FGRRES_16336,FGRRES_15772,	1
microtubule organizing center	GO:0005815	5	0.990618	0.57913	12	152	721	5289	FGRRES_06364,FGRRES_00660,FGRRES_02476,FGRRES_06948,FGRRES_00497,FGRRES_10100,FGRRES_09408,FGRRES_04378,FGRRES_05630_M,FGRRES_01065,FGRRES_01891_M,FGRRES_15772,	1
viral capsid	GO:0019028	3	0.991614	0.312155	2	47	721	5289	FGRRES_04286,FGRRES_09564,	1
nuclear chromosome	GO:0000228	6	0.992362	0.66436	24	265	721	5289	FGRRES_00297,FGRRES_01007,FGRRES_02026,FGRRES_06874,FGRRES_00799,FGRRES_00325,FGRRES_00348,FGRRES_05453_M,FGRRES_09025,FGRRES_12711,FGRRES_04887,FGRRES_05413,FGRRES_15847,FGRRES_10158_M,FGRRES_09564,FGRRES_00280_M,FGRRES_20304,FGRRES_09520,FGRRES_01052,FGRRES_06721,FGRRES_11093,FGRRES_01157,FGRRES_07020,FGRRES_04154_M,	1
proton-transporting two-sector ATPase complex	GO:0016469	5	0.99326	0.215754	1	34	721	5289	FGRRES_16433_M,	1
preribosome	GO:0030684	5	0.99382	0.479902	7	107	721	5289	FGRRES_16299,FGRRES_00270,FGRRES_05687,FGRRES_00398,FGRRES_01870,FGRRES_11603,FGRRES_04350,	1
membrane coat	GO:0030117	5	0.994184	0.20959	1	35	721	5289	FGRRES_01276,	1
coated membrane	GO:0048475	3	0.994184	0.20959	1	35	721	5289	FGRRES_01276,	1
endosome	GO:0005768	6	0.994745	0.449121	6	98	721	5289	FGRRES_10272,FGRRES_06542_M,FGRRES_01874,FGRRES_02758,FGRRES_06024,FGRRES_11208,	1
tethering complex	GO:0099023	3	0.994983	0.203768	1	36	721	5289	FGRRES_01874,	1
condensed nuclear chromosome kinetochore	GO:0000778	7	0.994983	0.203768	1	36	721	5289	FGRRES_00325,	1
virion part	GO:0044423	2	0.995009	0.287672	2	51	721	5289	FGRRES_04286,FGRRES_09564,	1
virion	GO:0019012	2	0.995009	0.287672	2	51	721	5289	FGRRES_04286,FGRRES_09564,	1
Golgi apparatus part	GO:0044431	5	0.995411	0.520259	10	141	721	5289	FGRRES_09255,FGRRES_06856,FGRRES_06542_M,FGRRES_04278,FGRRES_10145,FGRRES_02714,FGRRES_01276,FGRRES_00538,FGRRES_15855_M,FGRRES_08935,	1
protein-DNA complex	GO:0032993	3	0.99562	0.28214	2	52	721	5289	FGRRES_01007,FGRRES_07553,	1
histone acetyltransferase complex	GO:0000123	5	0.995671	0.198261	1	37	721	5289	FGRRES_00280_M,	1
ribonucleoprotein granule	GO:0035770	5	0.995671	0.198261	1	37	721	5289	FGRRES_05737_M,	1
cytoplasmic ribonucleoprotein granule	GO:0036464	6	0.995671	0.198261	1	37	721	5289	FGRRES_05737_M,	1
condensed chromosome kinetochore	GO:0000777	6	0.996265	0.193043	1	38	721	5289	FGRRES_00325,	1
condensed nuclear chromosome, centromeric region	GO:0000780	8	0.996778	0.188093	1	39	721	5289	FGRRES_00325,	1
mitochondrial matrix	GO:0005759	6	0.997251	0.465755	8	126	721	5289	FGRRES_05733,FGRRES_04309,FGRRES_10118,FGRRES_01573,FGRRES_01254,FGRRES_01245,FGRRES_01141,FGRRES_04454,	1
nuclear chromosome part	GO:0044454	5	0.997276	0.608888	21	253	721	5289	FGRRES_00297,FGRRES_01007,FGRRES_02026,FGRRES_06874,FGRRES_00799,FGRRES_00325,FGRRES_00348,FGRRES_05453_M,FGRRES_09025,FGRRES_12711,FGRRES_04887,FGRRES_05413,FGRRES_15847,FGRRES_09564,FGRRES_00280_M,FGRRES_09520,FGRRES_01052,FGRRES_06721,FGRRES_11093,FGRRES_01157,FGRRES_04154_M,	1
U2-type spliceosomal complex	GO:0005684	6	0.99741	0.261987	2	56	721	5289	FGRRES_01010,FGRRES_05737_M,	1
cytosolic ribosome	GO:0022626	6	0.997602	0.178918	1	41	721	5289	FGRRES_06353,	1
condensed chromosome, centromeric region	GO:0000779	7	0.997602	0.178918	1	41	721	5289	FGRRES_00325,	1
bounding membrane of organelle	GO:0098588	4	0.997659	0.643881	28	319	721	5289	FGRRES_13127,FGRRES_09255,FGRRES_07832,FGRRES_16723,FGRRES_06685_M,FGRRES_04178,FGRRES_01006,FGRRES_06856,FGRRES_10243,FGRRES_10272,FGRRES_06542_M,FGRRES_00371,FGRRES_02400,FGRRES_12821,FGRRES_09723,FGRRES_04278,FGRRES_11208,FGRRES_02714,FGRRES_02783,FGRRES_04370,FGRRES_08694,FGRRES_01276,FGRRES_09952,FGRRES_01606,FGRRES_15855_M,FGRRES_05154,FGRRES_05547,FGRRES_08935,	1
viral nucleocapsid	GO:0019013	3	0.997932	0.174658	1	42	721	5289	FGRRES_04286,	1
DNA-directed RNA polymerase II, holoenzyme	GO:0016591	6	0.998012	0.252953	2	58	721	5289	FGRRES_04308,FGRRES_06948,	1
condensed nuclear chromosome	GO:0000794	7	0.998012	0.252953	2	58	721	5289	FGRRES_00325,FGRRES_01157,	1
acetyltransferase complex	GO:1902493	5	0.998216	0.170596	1	43	721	5289	FGRRES_00280_M,	1
protein acetyltransferase complex	GO:0031248	4	0.998216	0.170596	1	43	721	5289	FGRRES_00280_M,	1
RNA polymerase II transcription factor complex	GO:0090575	6	0.998461	0.166719	1	44	721	5289	FGRRES_04308,	1
mitochondrial protein complex	GO:0098798	4	0.998521	0.297391	3	74	721	5289	FGRRES_13127,FGRRES_05733,FGRRES_04309,	1
RNA polymerase complex	GO:0030880	4	0.998573	0.337271	4	87	721	5289	FGRRES_04619,FGRRES_00365,FGRRES_04308,FGRRES_06948,	1
small ribosomal subunit	GO:0015935	6	0.998673	0.163014	1	45	721	5289	FGRRES_06353,	1
nuclear chromatin	GO:0000790	6	0.99878	0.486097	11	166	721	5289	FGRRES_00297,FGRRES_02026,FGRRES_00348,FGRRES_09025,FGRRES_05413,FGRRES_15847,FGRRES_09564,FGRRES_00280_M,FGRRES_09520,FGRRES_11093,FGRRES_04154_M,	1
nuclear DNA-directed RNA polymerase complex	GO:0055029	6	0.998846	0.289565	3	76	721	5289	FGRRES_00365,FGRRES_04308,FGRRES_06948,	1
DNA-directed RNA polymerase complex	GO:0000428	5	0.998981	0.285804	3	77	721	5289	FGRRES_00365,FGRRES_04308,FGRRES_06948,	1
kinetochore	GO:0000776	5	0.999013	0.156078	1	47	721	5289	FGRRES_00325,	1
mitochondrial membrane part	GO:0044455	3	0.999199	0.37943	6	116	721	5289	FGRRES_13127,FGRRES_09261,FGRRES_06298,FGRRES_10933,FGRRES_08694,FGRRES_12693,	1
condensed chromosome	GO:0000793	6	0.999317	0.222292	2	66	721	5289	FGRRES_00325,FGRRES_01157,	1
nuclear transcription factor complex	GO:0044798	5	0.999529	0.14107	1	52	721	5289	FGRRES_04308,	1
spliceosomal complex	GO:0005681	5	0.999544	0.212627	2	69	721	5289	FGRRES_01010,FGRRES_05737_M,	1
nucleoplasm part	GO:0044451	5	0.999639	0.476817	13	200	721	5289	FGRRES_00297,FGRRES_01007,FGRRES_10795,FGRRES_00365,FGRRES_04308,FGRRES_06948,FGRRES_16007,FGRRES_10148,FGRRES_06573,FGRRES_01279,FGRRES_05413,FGRRES_09564,FGRRES_00280_M,	1
chromosome	GO:0005694	5	0.999651	0.608035	31	374	721	5289	FGRRES_00297,FGRRES_16767,FGRRES_01007,FGRRES_02026,FGRRES_06874,FGRRES_00799,FGRRES_00325,FGRRES_00348,FGRRES_05453_M,FGRRES_01699_M,FGRRES_06922,FGRRES_06948,FGRRES_09025,FGRRES_01551,FGRRES_02752,FGRRES_12711,FGRRES_04887,FGRRES_05413,FGRRES_15847,FGRRES_07553,FGRRES_10158_M,FGRRES_09564,FGRRES_00280_M,FGRRES_20304,FGRRES_09520,FGRRES_01052,FGRRES_06721,FGRRES_11093,FGRRES_01157,FGRRES_07020,F…	1
intracellular vesicle	GO:0097708	5	0.999662	0.434062	10	169	721	5289	FGRRES_10272,FGRRES_06542_M,FGRRES_01874,FGRRES_02758,FGRRES_06024,FGRRES_11208,FGRRES_01276,FGRRES_00538,FGRRES_15855_M,FGRRES_08537,	1
cytoplasmic vesicle	GO:0031410	5	0.999662	0.434062	10	169	721	5289	FGRRES_10272,FGRRES_06542_M,FGRRES_01874,FGRRES_02758,FGRRES_06024,FGRRES_11208,FGRRES_01276,FGRRES_00538,FGRRES_15855_M,FGRRES_08537,	1
vesicle	GO:0031982	4	0.999693	0.431509	10	170	721	5289	FGRRES_10272,FGRRES_06542_M,FGRRES_01874,FGRRES_02758,FGRRES_06024,FGRRES_11208,FGRRES_01276,FGRRES_00538,FGRRES_15855_M,FGRRES_08537,	1
chromosomal part	GO:0044427	4	0.999728	0.592573	29	359	721	5289	FGRRES_00297,FGRRES_16767,FGRRES_01007,FGRRES_02026,FGRRES_06874,FGRRES_00799,FGRRES_00325,FGRRES_00348,FGRRES_05453_M,FGRRES_01699_M,FGRRES_06922,FGRRES_06948,FGRRES_09025,FGRRES_01551,FGRRES_02752,FGRRES_12711,FGRRES_04887,FGRRES_05413,FGRRES_15847,FGRRES_07553,FGRRES_09564,FGRRES_00280_M,FGRRES_09520,FGRRES_01052,FGRRES_06721,FGRRES_11093,FGRRES_01157,FGRRES_07020,FGRRES_04154_M,	1
nucleoplasm	GO:0005654	5	0.999736	0.491226	15	224	721	5289	FGRRES_00297,FGRRES_01007,FGRRES_10795,FGRRES_07310,FGRRES_00365,FGRRES_04308,FGRRES_06948,FGRRES_16007,FGRRES_10148,FGRRES_06573,FGRRES_11603,FGRRES_01279,FGRRES_05413,FGRRES_09564,FGRRES_00280_M,	1
mitochondrion	GO:0005739	5	0.999813	0.689483	61	649	721	5289	FGRRES_13127,FGRRES_09639,FGRRES_09638,FGRRES_05749,FGRRES_13137,FGRRES_13110,FGRRES_05733,FGRRES_09261,FGRRES_06298,FGRRES_09255,FGRRES_00646,FGRRES_16767,FGRRES_04117,FGRRES_08819,FGRRES_08426,FGRRES_01419,FGRRES_07326,FGRRES_05843,FGRRES_16145,FGRRES_08386,FGRRES_06150,FGRRES_12821,FGRRES_02495,FGRRES_05453_M,FGRRES_04309,FGRRES_04204,FGRRES_01699_M,FGRRES_17725,FGRRES_09312,FGRRES_09833,FGRRE…	1
mitochondrial envelope	GO:0005740	5	0.999919	0.464281	15	237	721	5289	FGRRES_13127,FGRRES_09639,FGRRES_13137,FGRRES_09261,FGRRES_06298,FGRRES_08386,FGRRES_12821,FGRRES_09833,FGRRES_10933,FGRRES_02783,FGRRES_08694,FGRRES_01245,FGRRES_06636,FGRRES_12693,FGRRES_05154,	1
nucleolus	GO:0005730	5	0.999958	0.470589	17	265	721	5289	FGRRES_16299,FGRRES_00270,FGRRES_05687,FGRRES_06874,FGRRES_00398,FGRRES_16145,FGRRES_01870,FGRRES_00365,FGRRES_04286,FGRRES_12040_1_M,FGRRES_02752,FGRRES_10179,FGRRES_11603,FGRRES_04350,FGRRES_09520,FGRRES_08540,FGRRES_04154_M,	1
chromatin	GO:0000785	5	0.999963	0.425729	13	224	721	5289	FGRRES_00297,FGRRES_02026,FGRRES_00348,FGRRES_06948,FGRRES_09025,FGRRES_05413,FGRRES_15847,FGRRES_07553,FGRRES_09564,FGRRES_00280_M,FGRRES_09520,FGRRES_11093,FGRRES_04154_M,	1
envelope	GO:0031975	3	0.99997	0.525476	25	349	721	5289	FGRRES_13127,FGRRES_09639,FGRRES_13137,FGRRES_09261,FGRRES_06298,FGRRES_00271,FGRRES_01854,FGRRES_09339,FGRRES_08386,FGRRES_12821,FGRRES_01324,FGRRES_09025,FGRRES_09833,FGRRES_09408,FGRRES_10933,FGRRES_12711,FGRRES_02783,FGRRES_08694,FGRRES_04350,FGRRES_01245,FGRRES_02233,FGRRES_06636,FGRRES_01157,FGRRES_12693,FGRRES_05154,	1
organelle envelope	GO:0031967	4	0.99997	0.525476	25	349	721	5289	FGRRES_13127,FGRRES_09639,FGRRES_13137,FGRRES_09261,FGRRES_06298,FGRRES_00271,FGRRES_01854,FGRRES_09339,FGRRES_08386,FGRRES_12821,FGRRES_01324,FGRRES_09025,FGRRES_09833,FGRRES_09408,FGRRES_10933,FGRRES_12711,FGRRES_02783,FGRRES_08694,FGRRES_04350,FGRRES_01245,FGRRES_02233,FGRRES_06636,FGRRES_01157,FGRRES_12693,FGRRES_05154,	1
mitochondrial membrane	GO:0031966	4	0.999973	0.39362	11	205	721	5289	FGRRES_13127,FGRRES_13137,FGRRES_09261,FGRRES_06298,FGRRES_12821,FGRRES_10933,FGRRES_02783,FGRRES_08694,FGRRES_06636,FGRRES_12693,FGRRES_05154,	1
cytosol	GO:0005829	5	0.999989	0.767625	151	1443	721	5289	FGRRES_09638,FGRRES_13137,FGRRES_10352,FGRRES_06353,FGRRES_02881_M,FGRRES_06297,FGRRES_00271,FGRRES_09279,FGRRES_03148,FGRRES_06127_M,FGRRES_16723,FGRRES_02540,FGRRES_06206,FGRRES_06328,FGRRES_16741,FGRRES_06307,FGRRES_02584,FGRRES_04107,FGRRES_13619,FGRRES_04126,FGRRES_04117,FGRRES_06804,FGRRES_04181,FGRRES_09694,FGRRES_01007,FGRRES_08803,FGRRES_02025,FGRRES_07908,FGRRES_05687,FGRRES_08462,FGRRE…	1
mitochondrial inner membrane	GO:0005743	5	0.999993	0.25471	5	144	721	5289	FGRRES_13137,FGRRES_09261,FGRRES_06298,FGRRES_10933,FGRRES_12693,	1
mitochondrial part	GO:0044429	5	0.999996	0.473267	22	341	721	5289	FGRRES_13127,FGRRES_09639,FGRRES_13137,FGRRES_05733,FGRRES_09261,FGRRES_06298,FGRRES_08386,FGRRES_12821,FGRRES_04309,FGRRES_09833,FGRRES_10118,FGRRES_10933,FGRRES_02783,FGRRES_01573,FGRRES_08694,FGRRES_01254,FGRRES_01245,FGRRES_06636,FGRRES_01141,FGRRES_04454,FGRRES_12693,FGRRES_05154,	1
membrane protein complex	GO:0098796	4	0.999996	0.330104	9	200	721	5289	FGRRES_13127,FGRRES_13137,FGRRES_07235,FGRRES_11208,FGRRES_16433_M,FGRRES_01981,FGRRES_01276,FGRRES_07450,FGRRES_05160,	1
organelle inner membrane	GO:0019866	4	0.999997	0.242902	5	151	721	5289	FGRRES_13137,FGRRES_09261,FGRRES_06298,FGRRES_10933,FGRRES_12693,	1
organelle membrane	GO:0031090	3	0.999999	0.529225	36	499	721	5289	FGRRES_13127,FGRRES_13137,FGRRES_09261,FGRRES_06298,FGRRES_09255,FGRRES_07832,FGRRES_16723,FGRRES_06685_M,FGRRES_04178,FGRRES_01006,FGRRES_06856,FGRRES_10243,FGRRES_10272,FGRRES_06542_M,FGRRES_00371,FGRRES_02400,FGRRES_12821,FGRRES_09723,FGRRES_04278,FGRRES_11208,FGRRES_02714,FGRRES_10933,FGRRES_02783,FGRRES_04370,FGRRES_08694,FGRRES_01276,FGRRES_02233,FGRRES_09952,FGRRES_01606,FGRRES_06636,FGRRE…	1
ribosomal subunit	GO:0044391	5	0.999999	0.0772173	1	95	721	5289	FGRRES_06353,	1
nuclear lumen	GO:0031981	5	1	0.562514	49	639	721	5289	FGRRES_00297,FGRRES_16299,FGRRES_00270,FGRRES_01007,FGRRES_02026,FGRRES_05687,FGRRES_10795,FGRRES_07310,FGRRES_06874,FGRRES_00398,FGRRES_00799,FGRRES_01854,FGRRES_16145,FGRRES_01863,FGRRES_01870,FGRRES_00365,FGRRES_00325,FGRRES_00348,FGRRES_05453_M,FGRRES_04308,FGRRES_04286,FGRRES_06948,FGRRES_12040_1_M,FGRRES_09025,FGRRES_02752,FGRRES_16007,FGRRES_10148,FGRRES_10179,FGRRES_06573,FGRRES_12711,FGR…	1
nucleus	GO:0005634	5	1	0.778627	254	2393	721	5289	FGRRES_00297,FGRRES_06364,FGRRES_13137,FGRRES_10352,FGRRES_13110,FGRRES_16299,FGRRES_02881_M,FGRRES_00660,FGRRES_02520,FGRRES_06297,FGRRES_10728,FGRRES_00270,FGRRES_00271,FGRRES_04256_M,FGRRES_17377,FGRRES_03148,FGRRES_00217,FGRRES_17323,FGRRES_17287_M,FGRRES_02531,FGRRES_03683,FGRRES_16701,FGRRES_16703,FGRRES_03650,FGRRES_16223,FGRRES_03111,FGRRES_15866_M,FGRRES_06328,FGRRES_16767,FGRRES_15730_M…	1
intracellular organelle lumen	GO:0070013	4	1	0.555324	62	819	721	5289	FGRRES_09639,FGRRES_00297,FGRRES_05733,FGRRES_16299,FGRRES_00270,FGRRES_01007,FGRRES_02026,FGRRES_05687,FGRRES_10795,FGRRES_07310,FGRRES_06874,FGRRES_00398,FGRRES_00799,FGRRES_01854,FGRRES_16145,FGRRES_01863,FGRRES_08386,FGRRES_01870,FGRRES_00365,FGRRES_00325,FGRRES_00348,FGRRES_05453_M,FGRRES_04309,FGRRES_04308,FGRRES_04286,FGRRES_06948,FGRRES_12040_1_M,FGRRES_09025,FGRRES_09833,FGRRES_02752,FGR…	1
organelle lumen	GO:0043233	3	1	0.555324	62	819	721	5289	FGRRES_09639,FGRRES_00297,FGRRES_05733,FGRRES_16299,FGRRES_00270,FGRRES_01007,FGRRES_02026,FGRRES_05687,FGRRES_10795,FGRRES_07310,FGRRES_06874,FGRRES_00398,FGRRES_00799,FGRRES_01854,FGRRES_16145,FGRRES_01863,FGRRES_08386,FGRRES_01870,FGRRES_00365,FGRRES_00325,FGRRES_00348,FGRRES_05453_M,FGRRES_04309,FGRRES_04308,FGRRES_04286,FGRRES_06948,FGRRES_12040_1_M,FGRRES_09025,FGRRES_09833,FGRRES_02752,FGR…	1
membrane-enclosed lumen	GO:0031974	2	1	0.555324	62	819	721	5289	FGRRES_09639,FGRRES_00297,FGRRES_05733,FGRRES_16299,FGRRES_00270,FGRRES_01007,FGRRES_02026,FGRRES_05687,FGRRES_10795,FGRRES_07310,FGRRES_06874,FGRRES_00398,FGRRES_00799,FGRRES_01854,FGRRES_16145,FGRRES_01863,FGRRES_08386,FGRRES_01870,FGRRES_00365,FGRRES_00325,FGRRES_00348,FGRRES_05453_M,FGRRES_04309,FGRRES_04308,FGRRES_04286,FGRRES_06948,FGRRES_12040_1_M,FGRRES_09025,FGRRES_09833,FGRRES_02752,FGR…	1
cytoplasm	GO:0005737	4	1	0.809906	331	2998	721	5289	FGRRES_10753,FGRRES_03603,FGRRES_13127,FGRRES_09639,FGRRES_09638,FGRRES_05749,FGRRES_10755,FGRRES_00299,FGRRES_06364,FGRRES_00298,FGRRES_13137,FGRRES_10352,FGRRES_13110,FGRRES_16293,FGRRES_05733,FGRRES_00296,FGRRES_06353,FGRRES_08485,FGRRES_02881_M,FGRRES_09261,FGRRES_02527,FGRRES_06297,FGRRES_06298,FGRRES_02522,FGRRES_00257,FGRRES_00271,FGRRES_09255,FGRRES_04256_M,FGRRES_00646,FGRRES_07180_M,FGR…	1
protein complex	GO:0043234	3	1	0.582871	82	1032	721	5289	FGRRES_16912_M,FGRRES_13127,FGRRES_06364,FGRRES_13137,FGRRES_05733,FGRRES_16299,FGRRES_00660,FGRRES_00270,FGRRES_09279,FGRRES_16767,FGRRES_16733,FGRRES_02584,FGRRES_01007,FGRRES_08803,FGRRES_02026,FGRRES_10795,FGRRES_07310,FGRRES_06874,FGRRES_00799,FGRRES_16146,FGRRES_15914_M,FGRRES_01863,FGRRES_01874,FGRRES_06149,FGRRES_00325,FGRRES_04309,FGRRES_04308,FGRRES_02482,FGRRES_13517,FGRRES_01324,FGRRE…	1
ribosome	GO:0005840	5	1	0.253749	11	318	721	5289	FGRRES_10755,FGRRES_06353,FGRRES_06804,FGRRES_04181,FGRRES_02025,FGRRES_17695,FGRRES_01870,FGRRES_04308,FGRRES_08737,FGRRES_17102,FGRRES_08532,	1
nuclear part	GO:0044428	4	1	0.529376	63	873	721	5289	FGRRES_00297,FGRRES_06364,FGRRES_16299,FGRRES_00660,FGRRES_10728,FGRRES_00270,FGRRES_00271,FGRRES_17287_M,FGRRES_02584,FGRRES_01007,FGRRES_02026,FGRRES_01010,FGRRES_05687,FGRRES_10795,FGRRES_07310,FGRRES_06874,FGRRES_00398,FGRRES_00799,FGRRES_01854,FGRRES_16145,FGRRES_09339,FGRRES_01863,FGRRES_01870,FGRRES_00365,FGRRES_05737_M,FGRRES_00325,FGRRES_00348,FGRRES_05453_M,FGRRES_04308,FGRRES_01324,FGR…	1
cytoplasmic part	GO:0044444	4	1	0.78386	293	2742	721	5289	FGRRES_10753,FGRRES_13127,FGRRES_09639,FGRRES_09638,FGRRES_05749,FGRRES_10755,FGRRES_06364,FGRRES_00298,FGRRES_13137,FGRRES_10352,FGRRES_13110,FGRRES_16293,FGRRES_05733,FGRRES_06353,FGRRES_08485,FGRRES_02881_M,FGRRES_09261,FGRRES_02527,FGRRES_06297,FGRRES_06298,FGRRES_02522,FGRRES_00257,FGRRES_00271,FGRRES_09255,FGRRES_00646,FGRRES_07180_M,FGRRES_07832,FGRRES_09279,FGRRES_03148,FGRRES_06127_M,FGR…	1
intracellular non-membrane-bounded organelle	GO:0043232	4	1	0.555829	86	1135	721	5289	FGRRES_10753,FGRRES_10755,FGRRES_00297,FGRRES_06364,FGRRES_00298,FGRRES_05733,FGRRES_16299,FGRRES_06353,FGRRES_08485,FGRRES_00660,FGRRES_00270,FGRRES_16767,FGRRES_06804,FGRRES_04181,FGRRES_01007,FGRRES_02025,FGRRES_02026,FGRRES_05687,FGRRES_02078,FGRRES_17695,FGRRES_06874,FGRRES_00398,FGRRES_00799,FGRRES_16145,FGRRES_16146,FGRRES_15914_M,FGRRES_01870,FGRRES_06149,FGRRES_07284,FGRRES_00365,FGRRES_…	1
non-membrane-bounded organelle	GO:0043228	3	1	0.555339	86	1136	721	5289	FGRRES_10753,FGRRES_10755,FGRRES_00297,FGRRES_06364,FGRRES_00298,FGRRES_05733,FGRRES_16299,FGRRES_06353,FGRRES_08485,FGRRES_00660,FGRRES_00270,FGRRES_16767,FGRRES_06804,FGRRES_04181,FGRRES_01007,FGRRES_02025,FGRRES_02026,FGRRES_05687,FGRRES_02078,FGRRES_17695,FGRRES_06874,FGRRES_00398,FGRRES_00799,FGRRES_16145,FGRRES_16146,FGRRES_15914_M,FGRRES_01870,FGRRES_06149,FGRRES_07284,FGRRES_00365,FGRRES_…	1
cell part	GO:0044464	2	1	0.872365	516	4339	721	5289	FGRRES_10753,FGRRES_03603,FGRRES_16912_M,FGRRES_13127,FGRRES_09639,FGRRES_09638,FGRRES_05749,FGRRES_10755,FGRRES_00299,FGRRES_00297,FGRRES_06364,FGRRES_00298,FGRRES_13137,FGRRES_03614,FGRRES_10352,FGRRES_13110,FGRRES_16293,FGRRES_10787,FGRRES_05733,FGRRES_00296,FGRRES_16299,FGRRES_06353,FGRRES_08485,FGRRES_02881_M,FGRRES_09261,FGRRES_00660,FGRRES_02527,FGRRES_09681,FGRRES_02520,FGRRES_06297,FGRRE…	1
cell	GO:0005623	2	1	0.871528	518	4360	721	5289	FGRRES_10753,FGRRES_03603,FGRRES_16912_M,FGRRES_13127,FGRRES_09639,FGRRES_09638,FGRRES_05749,FGRRES_10755,FGRRES_00299,FGRRES_00297,FGRRES_06364,FGRRES_00298,FGRRES_13137,FGRRES_03614,FGRRES_10352,FGRRES_13110,FGRRES_16293,FGRRES_10787,FGRRES_05733,FGRRES_00296,FGRRES_16299,FGRRES_06353,FGRRES_08485,FGRRES_02881_M,FGRRES_09261,FGRRES_00660,FGRRES_02527,FGRRES_09681,FGRRES_02520,FGRRES_06297,FGRRE…	1
intracellular ribonucleoprotein complex	GO:0030529	4	1	0.312155	24	564	721	5289	FGRRES_10755,FGRRES_16299,FGRRES_06353,FGRRES_00270,FGRRES_17287_M,FGRRES_06804,FGRRES_04181,FGRRES_02025,FGRRES_01010,FGRRES_05687,FGRRES_17695,FGRRES_00398,FGRRES_01870,FGRRES_05737_M,FGRRES_00348,FGRRES_04308,FGRRES_04286,FGRRES_08737,FGRRES_17102,FGRRES_11603,FGRRES_04350,FGRRES_20304,FGRRES_04997,FGRRES_08532,	1
ribonucleoprotein complex	GO:1990904	3	1	0.312155	24	564	721	5289	FGRRES_10755,FGRRES_16299,FGRRES_06353,FGRRES_00270,FGRRES_17287_M,FGRRES_06804,FGRRES_04181,FGRRES_02025,FGRRES_01010,FGRRES_05687,FGRRES_17695,FGRRES_00398,FGRRES_01870,FGRRES_05737_M,FGRRES_00348,FGRRES_04308,FGRRES_04286,FGRRES_08737,FGRRES_17102,FGRRES_11603,FGRRES_04350,FGRRES_20304,FGRRES_04997,FGRRES_08532,	1
intracellular membrane-bounded organelle	GO:0043231	4	1	0.795175	373	3441	721	5289	FGRRES_13127,FGRRES_09639,FGRRES_09638,FGRRES_05749,FGRRES_00297,FGRRES_06364,FGRRES_00298,FGRRES_13137,FGRRES_10352,FGRRES_13110,FGRRES_16293,FGRRES_05733,FGRRES_16299,FGRRES_02881_M,FGRRES_09261,FGRRES_00660,FGRRES_02527,FGRRES_02520,FGRRES_06297,FGRRES_06298,FGRRES_02522,FGRRES_00257,FGRRES_10728,FGRRES_00270,FGRRES_00271,FGRRES_09255,FGRRES_04256_M,FGRRES_00646,FGRRES_07180_M,FGRRES_07832,FGR…	1
membrane-bounded organelle	GO:0043227	3	1	0.794413	376	3472	721	5289	FGRRES_13127,FGRRES_09639,FGRRES_09638,FGRRES_05749,FGRRES_00297,FGRRES_06364,FGRRES_00298,FGRRES_13137,FGRRES_10352,FGRRES_13110,FGRRES_16293,FGRRES_05733,FGRRES_16299,FGRRES_02881_M,FGRRES_09261,FGRRES_00660,FGRRES_02527,FGRRES_02520,FGRRES_06297,FGRRES_06298,FGRRES_02522,FGRRES_00257,FGRRES_10728,FGRRES_00270,FGRRES_00271,FGRRES_09255,FGRRES_04256_M,FGRRES_00646,FGRRES_07180_M,FGRRES_07832,FGR…	1
intracellular	GO:0005622	3	1	0.855424	497	4262	721	5289	FGRRES_10753,FGRRES_03603,FGRRES_16912_M,FGRRES_13127,FGRRES_09639,FGRRES_09638,FGRRES_05749,FGRRES_10755,FGRRES_00299,FGRRES_00297,FGRRES_06364,FGRRES_00298,FGRRES_13137,FGRRES_10352,FGRRES_13110,FGRRES_16293,FGRRES_05733,FGRRES_00296,FGRRES_16299,FGRRES_06353,FGRRES_08485,FGRRES_02881_M,FGRRES_09261,FGRRES_00660,FGRRES_02527,FGRRES_02520,FGRRES_06297,FGRRES_06298,FGRRES_02522,FGRRES_00257,FGRRE…	1
cellular_component	GO:0005575	0	1	1	721	5289	721	5289	FGRRES_09224,FGRRES_10753,FGRRES_03603,FGRRES_16912_M,FGRRES_13127,FGRRES_09639,FGRRES_09638,FGRRES_05749,FGRRES_10755,FGRRES_00299,FGRRES_00297,FGRRES_06364,FGRRES_00298,FGRRES_07894,FGRRES_13137,FGRRES_03614,FGRRES_16276,FGRRES_05723,FGRRES_10352,FGRRES_13110,FGRRES_16293,FGRRES_10787,FGRRES_05733,FGRRES_00296,FGRRES_16299,FGRRES_06353,FGRRES_08485,FGRRES_02881_M,FGRRES_17235_M,FGRRES_09261,FGR…	1
macromolecular complex	GO:0032991	2	1	0.598828	148	1813	721	5289	FGRRES_16912_M,FGRRES_13127,FGRRES_09638,FGRRES_10755,FGRRES_00297,FGRRES_06364,FGRRES_13137,FGRRES_05733,FGRRES_16299,FGRRES_06353,FGRRES_00660,FGRRES_10728,FGRRES_00270,FGRRES_09255,FGRRES_09279,FGRRES_06127_M,FGRRES_17337,FGRRES_17287_M,FGRRES_16767,FGRRES_16733,FGRRES_02584,FGRRES_04102,FGRRES_04619,FGRRES_06804,FGRRES_04181,FGRRES_00621,FGRRES_01007,FGRRES_08803,FGRRES_02025,FGRRES_02026,FGR…	1
intracellular part	GO:0044424	3	1	0.834951	476	4182	721	5289	FGRRES_10753,FGRRES_03603,FGRRES_16912_M,FGRRES_13127,FGRRES_09639,FGRRES_09638,FGRRES_05749,FGRRES_10755,FGRRES_00299,FGRRES_00297,FGRRES_06364,FGRRES_00298,FGRRES_13137,FGRRES_10352,FGRRES_13110,FGRRES_16293,FGRRES_05733,FGRRES_00296,FGRRES_16299,FGRRES_06353,FGRRES_08485,FGRRES_02881_M,FGRRES_09261,FGRRES_00660,FGRRES_02527,FGRRES_02520,FGRRES_06297,FGRRES_06298,FGRRES_02522,FGRRES_00257,FGRRE…	1
organelle part	GO:0044422	2	1	0.588236	153	1908	721	5289	FGRRES_13127,FGRRES_09639,FGRRES_00297,FGRRES_06364,FGRRES_13137,FGRRES_05733,FGRRES_16299,FGRRES_06353,FGRRES_08485,FGRRES_09261,FGRRES_00660,FGRRES_02527,FGRRES_06298,FGRRES_02522,FGRRES_10728,FGRRES_00270,FGRRES_00271,FGRRES_09255,FGRRES_07832,FGRRES_16723,FGRRES_17287_M,FGRRES_16767,FGRRES_16733,FGRRES_02584,FGRRES_06685_M,FGRRES_04102,FGRRES_08830,FGRRES_04178,FGRRES_01006,FGRRES_01007,FGRRE…	1
intracellular organelle part	GO:0044446	3	1	0.589471	153	1904	721	5289	FGRRES_13127,FGRRES_09639,FGRRES_00297,FGRRES_06364,FGRRES_13137,FGRRES_05733,FGRRES_16299,FGRRES_06353,FGRRES_08485,FGRRES_09261,FGRRES_00660,FGRRES_02527,FGRRES_06298,FGRRES_02522,FGRRES_10728,FGRRES_00270,FGRRES_00271,FGRRES_09255,FGRRES_07832,FGRRES_16723,FGRRES_17287_M,FGRRES_16767,FGRRES_16733,FGRRES_02584,FGRRES_06685_M,FGRRES_04102,FGRRES_08830,FGRRES_04178,FGRRES_01006,FGRRES_01007,FGRRE…	1
intracellular organelle	GO:0043229	3	1	0.78829	399	3713	721	5289	FGRRES_10753,FGRRES_13127,FGRRES_09639,FGRRES_09638,FGRRES_05749,FGRRES_10755,FGRRES_00297,FGRRES_06364,FGRRES_00298,FGRRES_13137,FGRRES_10352,FGRRES_13110,FGRRES_16293,FGRRES_05733,FGRRES_16299,FGRRES_06353,FGRRES_08485,FGRRES_02881_M,FGRRES_09261,FGRRES_00660,FGRRES_02527,FGRRES_02520,FGRRES_06297,FGRRES_06298,FGRRES_02522,FGRRES_00257,FGRRES_10728,FGRRES_00270,FGRRES_00271,FGRRES_09255,FGRRES_…	1
organelle	GO:0043226	2	1	0.787654	399	3716	721	5289	FGRRES_10753,FGRRES_13127,FGRRES_09639,FGRRES_09638,FGRRES_05749,FGRRES_10755,FGRRES_00297,FGRRES_06364,FGRRES_00298,FGRRES_13137,FGRRES_10352,FGRRES_13110,FGRRES_16293,FGRRES_05733,FGRRES_16299,FGRRES_06353,FGRRES_08485,FGRRES_02881_M,FGRRES_09261,FGRRES_00660,FGRRES_02527,FGRRES_02520,FGRRES_06297,FGRRES_06298,FGRRES_02522,FGRRES_00257,FGRRES_10728,FGRRES_00270,FGRRES_00271,FGRRES_09255,FGRRES_…	1
Note: Categories whose corrected p-value<=0.05 were highlighted in yellow

## Sheet: ΔFgSAS3 Molecular Function
Table S4 Go enrichment of DEGs of ΔFgSAS3 and ΔFgSAS3 mutants
ΔFgSAS3 Molecular Function
GO_Name	GO_ID	GO_Level	P_value	EnrichmentScore	HitsGenesCountsInSelectedSet	HitsGenesCountsInBackground	AllGenesCountsInSelectedSet	AllGenesCountsInBackground	GenesOfSelectedSetInGOterm	corrected p-value(BH method)
heme binding	GO:0020037	5	1.81657e-09	2.08731	62	172	1275	7383	FGRRES_02881_M,FGRRES_02117,FGRRES_02119,FGRRES_02111,FGRRES_17337,FGRRES_01027,FGRRES_02882,FGRRES_07925,FGRRES_08809,FGRRES_08402,FGRRES_08023,FGRRES_08079,FGRRES_08377,FGRRES_09351,FGRRES_00765,FGRRES_03542_M,FGRRES_10606,FGRRES_03547,FGRRES_03548,FGRRES_02419,FGRRES_09086_M,FGRRES_03540,FGRRES_03535,FGRRES_02482,FGRRES_05334,FGRRES_15910,FGRRES_16384_5_M,FGRRES_15680_M,FGRRES_10695,FGRRES_159…	1.77842e-06
tetrapyrrole binding	GO:0046906	4	1.81657e-09	2.08731	62	172	1275	7383	FGRRES_02881_M,FGRRES_02117,FGRRES_02119,FGRRES_02111,FGRRES_17337,FGRRES_01027,FGRRES_02882,FGRRES_07925,FGRRES_08809,FGRRES_08402,FGRRES_08023,FGRRES_08079,FGRRES_08377,FGRRES_09351,FGRRES_00765,FGRRES_03542_M,FGRRES_10606,FGRRES_03547,FGRRES_03548,FGRRES_02419,FGRRES_09086_M,FGRRES_03540,FGRRES_03535,FGRRES_02482,FGRRES_05334,FGRRES_15910,FGRRES_16384_5_M,FGRRES_15680_M,FGRRES_10695,FGRRES_159…	1.77842e-06
oxidoreductase activity	GO:0016491	3	1.06287e-08	1.33336	280	1216	1275	7383	FGRRES_03603,FGRRES_09222,FGRRES_09639,FGRRES_05749,FGRRES_13137,FGRRES_10392,FGRRES_06758,FGRRES_06752,FGRRES_09240,FGRRES_11492,FGRRES_13110,FGRRES_06217,FGRRES_05733,FGRRES_16294,FGRRES_02881_M,FGRRES_05704,FGRRES_02117,FGRRES_02119,FGRRES_09684,FGRRES_02522,FGRRES_07180_M,FGRRES_17383,FGRRES_09279,FGRRES_02111,FGRRES_07842,FGRRES_00249,FGRRES_06127_M,FGRRES_11032,FGRRES_11407,FGRRES_17337,FGR…	3.46849e-06
catalytic activity	GO:0003824	2	3.54153e-06	1.08872	866	4606	1275	7383	FGRRES_03603,FGRRES_09222,FGRRES_03601,FGRRES_09639,FGRRES_02807,FGRRES_09638,FGRRES_05749,FGRRES_00299,FGRRES_07893,FGRRES_00298,FGRRES_07896,FGRRES_06368,FGRRES_01744,FGRRES_13137,FGRRES_03614,FGRRES_10392,FGRRES_10387,FGRRES_17398,FGRRES_06758,FGRRES_06751,FGRRES_06752,FGRRES_09240,FGRRES_11492,FGRRES_10352,FGRRES_00278,FGRRES_13110,FGRRES_05739,FGRRES_16293,FGRRES_06217,FGRRES_05733,FGRRES_00…	0.00086679
transmembrane transporter activity	GO:0022857	3	0.00017704	1.34562	122	525	1275	7383	FGRRES_13127,FGRRES_07894,FGRRES_16276,FGRRES_05723,FGRRES_09681,FGRRES_01785,FGRRES_09673,FGRRES_00646,FGRRES_10747,FGRRES_07832,FGRRES_11029,FGRRES_09297,FGRRES_03168,FGRRES_04580,FGRRES_03111,FGRRES_11480,FGRRES_11069,FGRRES_16255,FGRRES_06685_M,FGRRES_08830,FGRRES_04182,FGRRES_04178,FGRRES_01006,FGRRES_02870,FGRRES_01407,FGRRES_08466,FGRRES_05659,FGRRES_02066,FGRRES_09367,FGRRES_03934_M,FGRRE…	0.0346643
peroxidase activity	GO:0004601	3	0.000342539	2.48168	15	35	1275	7383	FGRRES_02881_M,FGRRES_09279,FGRRES_10296_M,FGRRES_02882,FGRRES_00353,FGRRES_06150,FGRRES_10606,FGRRES_12821,FGRRES_16013,FGRRES_06596,FGRRES_01245,FGRRES_04434,FGRRES_17094,FGRRES_08911,FGRRES_05159,	0.055891
ion transmembrane transporter activity	GO:0015075	5	0.000592403	1.42392	75	305	1275	7383	FGRRES_13127,FGRRES_16276,FGRRES_05723,FGRRES_09681,FGRRES_01785,FGRRES_09673,FGRRES_07832,FGRRES_11029,FGRRES_09297,FGRRES_03111,FGRRES_16255,FGRRES_06685_M,FGRRES_04182,FGRRES_04178,FGRRES_01006,FGRRES_01407,FGRRES_08466,FGRRES_08697_M,FGRRES_00768,FGRRES_00371,FGRRES_02400,FGRRES_00773,FGRRES_02495,FGRRES_04204,FGRRES_01364,FGRRES_15955,FGRRES_07496_M,FGRRES_15919,FGRRES_15904,FGRRES_12440,FGR…	0.0724953
iron ion binding	GO:0005506	7	0.000773735	1.54005	50	188	1275	7383	FGRRES_10392,FGRRES_02117,FGRRES_02119,FGRRES_02522,FGRRES_02111,FGRRES_11440,FGRRES_07925,FGRRES_08809,FGRRES_08023,FGRRES_08079,FGRRES_08377,FGRRES_09351,FGRRES_00765,FGRRES_03542_M,FGRRES_03548,FGRRES_02419,FGRRES_09086_M,FGRRES_03540,FGRRES_03535,FGRRES_02482,FGRRES_05334,FGRRES_16384_5_M,FGRRES_15680_M,FGRRES_10695,FGRRES_15969,FGRRES_02366,FGRRES_17598,FGRRES_16458,FGRRES_16069,FGRRES_03860…	0.0757486
metal ion transmembrane transporter activity	GO:0046873	8	0.000561489	1.82529	29	92	1275	7383	FGRRES_09681,FGRRES_09673,FGRRES_07832,FGRRES_11029,FGRRES_06685_M,FGRRES_04178,FGRRES_08697_M,FGRRES_00768,FGRRES_00371,FGRRES_02400,FGRRES_00773,FGRRES_02495,FGRRES_01364,FGRRES_01802,FGRRES_00880,FGRRES_17162,FGRRES_08264,FGRRES_10531,FGRRES_16483,FGRRES_06513,FGRRES_17102,FGRRES_01230,FGRRES_00351_M,FGRRES_16803,FGRRES_01606,FGRRES_09515,FGRRES_11939,FGRRES_09153_M,FGRRES_05160,	0.0785282
oxidoreductase activity, acting on peroxide as acceptor	GO:0016684	4	0.000975334	2.28576	15	38	1275	7383	FGRRES_02881_M,FGRRES_09279,FGRRES_10296_M,FGRRES_02882,FGRRES_00353,FGRRES_06150,FGRRES_10606,FGRRES_12821,FGRRES_16013,FGRRES_06596,FGRRES_01245,FGRRES_04434,FGRRES_17094,FGRRES_08911,FGRRES_05159,	0.079571
monooxygenase activity	GO:0004497	4	0.000903411	1.50333	54	208	1275	7383	FGRRES_11492,FGRRES_02117,FGRRES_02119,FGRRES_02111,FGRRES_08435,FGRRES_08809,FGRRES_08023,FGRRES_08079,FGRRES_08377,FGRRES_09351,FGRRES_06478,FGRRES_03542_M,FGRRES_03548,FGRRES_02419,FGRRES_03915,FGRRES_09086_M,FGRRES_03540,FGRRES_03535,FGRRES_03531,FGRRES_05334,FGRRES_16384_5_M,FGRRES_05371,FGRRES_15680_M,FGRRES_10695,FGRRES_15969,FGRRES_02366,FGRRES_17598,FGRRES_16458,FGRRES_16069,FGRRES_06539…	0.0804036
oxidoreductase activity, acting on paired donors, with incorporation or reduction of molecular oxygen	GO:0016705	4	0.000770656	1.51931	53	202	1275	7383	FGRRES_10392,FGRRES_11492,FGRRES_02117,FGRRES_02119,FGRRES_02522,FGRRES_02111,FGRRES_11440,FGRRES_08081,FGRRES_08809,FGRRES_08023,FGRRES_08079,FGRRES_08377,FGRRES_09351,FGRRES_06478,FGRRES_00765,FGRRES_03542_M,FGRRES_03548,FGRRES_02419,FGRRES_09086_M,FGRRES_03540,FGRRES_03535,FGRRES_05334,FGRRES_16384_5_M,FGRRES_05784,FGRRES_15680_M,FGRRES_10695,FGRRES_15969,FGRRES_02366,FGRRES_17598,FGRRES_16458…	0.0838303
antioxidant activity	GO:0016209	2	0.00186622	2.10567	16	44	1275	7383	FGRRES_02881_M,FGRRES_09279,FGRRES_10296_M,FGRRES_02882,FGRRES_00353,FGRRES_06150,FGRRES_10606,FGRRES_12821,FGRRES_16013,FGRRES_06596,FGRRES_01245,FGRRES_04454,FGRRES_04434,FGRRES_17094,FGRRES_08911,FGRRES_05159,	0.140541
amino acid transmembrane transporter activity	GO:0015171	7	0.00261263	1.8199	22	70	1275	7383	FGRRES_16276,FGRRES_09297,FGRRES_16255,FGRRES_04182,FGRRES_15955,FGRRES_07496_M,FGRRES_15919,FGRRES_12440,FGRRES_08347,FGRRES_09053,FGRRES_06508,FGRRES_11250,FGRRES_12342,FGRRES_07131,FGRRES_08221,FGRRES_02272,FGRRES_01675,FGRRES_16846,FGRRES_04055,FGRRES_04943,FGRRES_02145,FGRRES_05574,	0.150457
substrate-specific transmembrane transporter activity	GO:0022891	4	0.00259539	1.29858	98	437	1275	7383	FGRRES_13127,FGRRES_16276,FGRRES_05723,FGRRES_09681,FGRRES_01785,FGRRES_09673,FGRRES_00646,FGRRES_10747,FGRRES_07832,FGRRES_11029,FGRRES_09297,FGRRES_03168,FGRRES_03111,FGRRES_11480,FGRRES_11069,FGRRES_16255,FGRRES_06685_M,FGRRES_04182,FGRRES_04178,FGRRES_01006,FGRRES_01407,FGRRES_08466,FGRRES_02066,FGRRES_09367,FGRRES_03934_M,FGRRES_08697_M,FGRRES_00768,FGRRES_00371,FGRRES_02400,FGRRES_00773,FGR…	0.158805
nitronate monooxygenase activity	GO:0018580	6	0.00235307	4.13613	5	7	1275	7383	FGRRES_08435,FGRRES_15680_M,FGRRES_16033,FGRRES_11656,FGRRES_10065,	0.164547
oxidoreductase activity, acting on single donors with incorporation of molecular oxygen, incorporation of one atom of oxygen (internal monooxygenases or internal mixed function oxidases)	GO:0016703	5	0.00235307	4.13613	5	7	1275	7383	FGRRES_08435,FGRRES_15680_M,FGRRES_16033,FGRRES_11656,FGRRES_10065,	0.164547
transporter activity	GO:0005215	2	0.00362637	1.23361	134	629	1275	7383	FGRRES_13127,FGRRES_07894,FGRRES_16276,FGRRES_05723,FGRRES_09681,FGRRES_01785,FGRRES_09673,FGRRES_00646,FGRRES_10747,FGRRES_07832,FGRRES_11029,FGRRES_09297,FGRRES_03162,FGRRES_03168,FGRRES_04580,FGRRES_03111,FGRRES_11480,FGRRES_11069,FGRRES_16255,FGRRES_06685_M,FGRRES_08830,FGRRES_04182,FGRRES_04178,FGRRES_01006,FGRRES_08810,FGRRES_02870,FGRRES_01407,FGRRES_08466,FGRRES_05659,FGRRES_02066,FGRRES_…	0.177511
oxidoreductase activity, acting on other nitrogenous compounds as donors	GO:0016661	4	0.00381941	4.63247	4	5	1275	7383	FGRRES_17337,FGRRES_04126,FGRRES_08402,FGRRES_15910,	0.178057
carboxylic acid transmembrane transporter activity	GO:0046943	6	0.00352653	1.69163	26	89	1275	7383	FGRRES_16276,FGRRES_01785,FGRRES_09297,FGRRES_16255,FGRRES_04182,FGRRES_04204,FGRRES_15955,FGRRES_07496_M,FGRRES_15919,FGRRES_12440,FGRRES_08347,FGRRES_16461,FGRRES_09053,FGRRES_06508,FGRRES_11250,FGRRES_12342,FGRRES_07131,FGRRES_04319,FGRRES_08221,FGRRES_02272,FGRRES_01675,FGRRES_16846,FGRRES_04055,FGRRES_04943,FGRRES_02145,FGRRES_05574,	0.191804
organic acid transmembrane transporter activity	GO:0005342	5	0.00352653	1.69163	26	89	1275	7383	FGRRES_16276,FGRRES_01785,FGRRES_09297,FGRRES_16255,FGRRES_04182,FGRRES_04204,FGRRES_15955,FGRRES_07496_M,FGRRES_15919,FGRRES_12440,FGRRES_08347,FGRRES_16461,FGRRES_09053,FGRRES_06508,FGRRES_11250,FGRRES_12342,FGRRES_07131,FGRRES_04319,FGRRES_08221,FGRRES_02272,FGRRES_01675,FGRRES_16846,FGRRES_04055,FGRRES_04943,FGRRES_02145,FGRRES_05574,	0.191804
oxidoreductase activity, acting on CH-OH group of donors	GO:0016614	4	0.00539226	1.41869	49	200	1275	7383	FGRRES_03603,FGRRES_13110,FGRRES_05733,FGRRES_05704,FGRRES_06127_M,FGRRES_11032,FGRRES_02539,FGRRES_04143,FGRRES_03593,FGRRES_07908,FGRRES_06852,FGRRES_06104,FGRRES_09344,FGRRES_02407,FGRRES_10609,FGRRES_02427,FGRRES_03546,FGRRES_03569,FGRRES_04732,FGRRES_15918,FGRRES_04299,FGRRES_04287,FGRRES_13963,FGRRES_05374,FGRRES_16919,FGRRES_11228,FGRRES_11217,FGRRES_10118,FGRRES_16027,FGRRES_16026,FGRRES_…	0.203039
organic anion transmembrane transporter activity	GO:0008514	7	0.00529412	1.6286	27	96	1275	7383	FGRRES_13127,FGRRES_16276,FGRRES_01785,FGRRES_09297,FGRRES_16255,FGRRES_04182,FGRRES_04204,FGRRES_15955,FGRRES_07496_M,FGRRES_15919,FGRRES_12440,FGRRES_08347,FGRRES_16461,FGRRES_09053,FGRRES_06508,FGRRES_11250,FGRRES_12342,FGRRES_07131,FGRRES_04319,FGRRES_08221,FGRRES_02272,FGRRES_01675,FGRRES_16846,FGRRES_04055,FGRRES_04943,FGRRES_02145,FGRRES_05574,	0.207318
oxidoreductase activity, acting on the CH-OH group of donors, NAD or NADP as acceptor	GO:0016616	5	0.00528286	1.46509	42	166	1275	7383	FGRRES_03603,FGRRES_13110,FGRRES_05733,FGRRES_05704,FGRRES_06127_M,FGRRES_02539,FGRRES_04143,FGRRES_03593,FGRRES_07908,FGRRES_06852,FGRRES_06104,FGRRES_09344,FGRRES_02407,FGRRES_10609,FGRRES_02427,FGRRES_03546,FGRRES_04732,FGRRES_15918,FGRRES_04287,FGRRES_13963,FGRRES_16919,FGRRES_11217,FGRRES_10118,FGRRES_16027,FGRRES_16026,FGRRES_07191,FGRRES_12357,FGRRES_08694,FGRRES_01279,FGRRES_08667,FGRRES_…	0.215497
divalent inorganic cation transmembrane transporter activity	GO:0072509	8	0.00522018	2.09105	13	36	1275	7383	FGRRES_09681,FGRRES_09673,FGRRES_07832,FGRRES_06685_M,FGRRES_04178,FGRRES_00371,FGRRES_02400,FGRRES_01364,FGRRES_01802,FGRRES_16483,FGRRES_01606,FGRRES_09515,FGRRES_11939,	0.222198
oxidoreductase activity, acting on other nitrogenous compounds as donors, with NAD or NADP as acceptor	GO:0046857	5	0.00514027	5.79059	3	3	1275	7383	FGRRES_17337,FGRRES_08402,FGRRES_15910,	0.228742
cation transmembrane transporter activity	GO:0008324	6	0.00705056	1.41685	46	188	1275	7383	FGRRES_05723,FGRRES_09681,FGRRES_09673,FGRRES_07832,FGRRES_11029,FGRRES_09297,FGRRES_03111,FGRRES_06685_M,FGRRES_04178,FGRRES_01407,FGRRES_08466,FGRRES_08697_M,FGRRES_00768,FGRRES_00371,FGRRES_02400,FGRRES_00773,FGRRES_02495,FGRRES_04204,FGRRES_01364,FGRRES_15904,FGRRES_01802,FGRRES_00880,FGRRES_17162,FGRRES_08264,FGRRES_10531,FGRRES_16433_M,FGRRES_03776_M,FGRRES_16483,FGRRES_06513,FGRRES_17102,F…	0.246518
anion transmembrane transporter activity	GO:0008509	6	0.00701624	1.5314	32	121	1275	7383	FGRRES_13127,FGRRES_16276,FGRRES_01785,FGRRES_09297,FGRRES_16255,FGRRES_04182,FGRRES_01006,FGRRES_04204,FGRRES_15955,FGRRES_07496_M,FGRRES_15919,FGRRES_12440,FGRRES_08347,FGRRES_06579,FGRRES_16461,FGRRES_00416,FGRRES_09053,FGRRES_06508,FGRRES_11250,FGRRES_12342,FGRRES_07131,FGRRES_04319,FGRRES_08221,FGRRES_02272,FGRRES_01675,FGRRES_01066,FGRRES_16846,FGRRES_04055,FGRRES_04943,FGRRES_06815_M,FGRRE…	0.254404
FMN binding	GO:0010181	6	0.00919661	1.78982	17	55	1275	7383	FGRRES_09639,FGRRES_09684,FGRRES_07842,FGRRES_01027,FGRRES_08077,FGRRES_17247,FGRRES_02482,FGRRES_01972,FGRRES_03355,FGRRES_07583,FGRRES_15846,FGRRES_00144,FGRRES_07596,FGRRES_07597,FGRRES_03710,FGRRES_04012,FGRRES_08965,	0.310465
NAD+ ADP-ribosyltransferase activity	GO:0003950	6	0.00988967	3.86039	4	6	1275	7383	FGRRES_03938,FGRRES_17509,FGRRES_05924,FGRRES_15704,	0.322733
cellulase activity	GO:0008810	6	0.0104002	3.21699	5	9	1275	7383	FGRRES_05851,FGRRES_08253,FGRRES_07892_M,FGRRES_16349,FGRRES_02658,	0.328444
coenzyme binding	GO:0050662	4	0.0112437	1.28484	73	329	1275	7383	FGRRES_03603,FGRRES_13137,FGRRES_11492,FGRRES_13110,FGRRES_05733,FGRRES_06127_M,FGRRES_11407,FGRRES_17337,FGRRES_02539,FGRRES_03651,FGRRES_11081,FGRRES_04143,FGRRES_04130,FGRRES_03593,FGRRES_08426,FGRRES_08402,FGRRES_08462,FGRRES_06478,FGRRES_09344,FGRRES_00765,FGRRES_02407,FGRRES_10609,FGRRES_02427,FGRRES_03546,FGRRES_02433,FGRRES_01819_M,FGRRES_04309,FGRRES_02482,FGRRES_04732,FGRRES_15910,FGRRE…	0.343988
cofactor binding	GO:0048037	3	0.0135821	1.22286	102	483	1275	7383	FGRRES_03603,FGRRES_09639,FGRRES_13137,FGRRES_06751,FGRRES_11492,FGRRES_13110,FGRRES_05733,FGRRES_00296,FGRRES_09684,FGRRES_04256_M,FGRRES_07842,FGRRES_06127_M,FGRRES_11407,FGRRES_17337,FGRRES_02539,FGRRES_03651,FGRRES_11081,FGRRES_04102,FGRRES_04143,FGRRES_04130,FGRRES_03593,FGRRES_01027,FGRRES_08821,FGRRES_08426,FGRRES_08402,FGRRES_08462,FGRRES_12518,FGRRES_08077,FGRRES_06478,FGRRES_09344,FGRRE…	0.402935
transition metal ion transmembrane transporter activity	GO:0046915	9	0.0146109	2.17147	9	24	1275	7383	FGRRES_09681,FGRRES_07832,FGRRES_11029,FGRRES_06685_M,FGRRES_08697_M,FGRRES_00773,FGRRES_06513,FGRRES_01230,FGRRES_05160,	0.420707
active transmembrane transporter activity	GO:0022804	4	0.0308326	1.33629	39	169	1275	7383	FGRRES_07894,FGRRES_09681,FGRRES_04580,FGRRES_08830,FGRRES_01006,FGRRES_02870,FGRRES_08466,FGRRES_05659,FGRRES_02400,FGRRES_03080,FGRRES_03032,FGRRES_16114,FGRRES_09707,FGRRES_04204,FGRRES_01802,FGRRES_03882,FGRRES_02316,FGRRES_10531,FGRRES_06579,FGRRES_10995,FGRRES_11272,FGRRES_12704,FGRRES_01230,FGRRES_07131,FGRRES_07587,FGRRES_06881_M,FGRRES_01606,FGRRES_09515,FGRRES_01066,FGRRES_16825,FGRRES_…	0.511612
arylformamidase activity	GO:0004061	6	0.0199385	3.30891	4	7	1275	7383	FGRRES_05739,FGRRES_03933,FGRRES_13956,FGRRES_04819,	0.513678
alcohol O-acetyltransferase activity	GO:0004026	8	0.0199385	3.30891	4	7	1275	7383	FGRRES_03392_M,FGRRES_04208,FGRRES_03854_M,FGRRES_07598,	0.513678
alcohol O-acyltransferase activity	GO:0034318	7	0.0199385	3.30891	4	7	1275	7383	FGRRES_03392_M,FGRRES_04208,FGRRES_03854_M,FGRRES_07598,	0.513678
3-hydroxyacyl-CoA dehydrogenase activity	GO:0003857	6	0.0199385	3.30891	4	7	1275	7383	FGRRES_03546,FGRRES_15918,FGRRES_13963,FGRRES_12330,	0.513678
lyase activity	GO:0016829	3	0.0316966	1.29278	48	215	1275	7383	FGRRES_03614,FGRRES_00296,FGRRES_03647,FGRRES_06328,FGRRES_10397,FGRRES_02717_M,FGRRES_02063,FGRRES_00797,FGRRES_06477,FGRRES_08386,FGRRES_09754,FGRRES_03069,FGRRES_02001,FGRRES_02003,FGRRES_10776_M,FGRRES_03537,FGRRES_05335,FGRRES_08061_M,FGRRES_03481,FGRRES_01346,FGRRES_13946,FGRRES_04287,FGRRES_01813,FGRRES_09311,FGRRES_09035,FGRRES_02302,FGRRES_10177,FGRRES_04430,FGRRES_09896,FGRRES_06544,FGR…	0.517183
carbon-oxygen lyase activity, acting on phosphates	GO:0016838	5	0.173705	1.78172	4	13	1275	7383	FGRRES_10397,FGRRES_03537,FGRRES_04287,FGRRES_15742,	0.523254
calcium ion binding	GO:0005509	6	0.174925	1.33629	12	52	1275	7383	FGRRES_08739_M,FGRRES_02893,FGRRES_07284,FGRRES_01364,FGRRES_02477_M,FGRRES_00444,FGRRES_07131,FGRRES_01243,FGRRES_00831,FGRRES_01891_M,FGRRES_11939,FGRRES_04930,	0.525312
hydro-lyase activity	GO:0016836	5	0.176568	1.37871	10	42	1275	7383	FGRRES_02717_M,FGRRES_06477,FGRRES_01346,FGRRES_04287,FGRRES_06544,FGRRES_10198,FGRRES_05482,FGRRES_08194,FGRRES_10080,FGRRES_09589,	0.528624
phosphorelay sensor kinase activity	GO:0000155	8	0.0189598	2.20594	8	21	1275	7383	FGRRES_10606,FGRRES_02449,FGRRES_00737,FGRRES_07623,FGRRES_00856,FGRRES_10042,FGRRES_08540,FGRRES_07493,	0.530334
protein histidine kinase activity	GO:0004673	7	0.0189598	2.20594	8	21	1275	7383	FGRRES_10606,FGRRES_02449,FGRRES_00737,FGRRES_07623,FGRRES_00856,FGRRES_10042,FGRRES_08540,FGRRES_07493,	0.530334
phosphotransferase activity, nitrogenous group as acceptor	GO:0016775	5	0.0189598	2.20594	8	21	1275	7383	FGRRES_10606,FGRRES_02449,FGRRES_00737,FGRRES_07623,FGRRES_00856,FGRRES_10042,FGRRES_08540,FGRRES_07493,	0.530334
chitin synthase activity	GO:0004100	7	0.0344936	2.89529	4	8	1275	7383	FGRRES_16273_M,FGRRES_10116,FGRRES_10117,FGRRES_01964,	0.553595
nucleobase-containing compound transmembrane transporter activity	GO:0015932	5	0.187097	1.6085	5	18	1275	7383	FGRRES_13127,FGRRES_00646,FGRRES_11069,FGRRES_10531,FGRRES_02699,	0.558438
acid phosphatase activity	GO:0003993	7	0.0246327	2.2519	7	18	1275	7383	FGRRES_12043,FGRRES_03402,FGRRES_00406,FGRRES_05079,FGRRES_05987,FGRRES_04504,FGRRES_04986,	0.560824
carbon-carbon lyase activity	GO:0016830	4	0.0242243	1.65445	16	56	1275	7383	FGRRES_06328,FGRRES_00797,FGRRES_02001,FGRRES_05335,FGRRES_08061_M,FGRRES_13946,FGRRES_09035,FGRRES_02302,FGRRES_09896,FGRRES_06553,FGRRES_16955,FGRRES_03422,FGRRES_05903,FGRRES_03391,FGRRES_05156,FGRRES_10446,	0.564656
nucleotide transmembrane transporter activity	GO:0015215	5	0.192488	1.9302	3	9	1275	7383	FGRRES_13127,FGRRES_00646,FGRRES_11069,	0.572783
cation channel activity	GO:0005261	7	0.192488	1.9302	3	9	1275	7383	FGRRES_04178,FGRRES_01364,FGRRES_11939,	0.572783
peroxiredoxin activity	GO:0051920	3	0.192488	1.9302	3	9	1275	7383	FGRRES_10296_M,FGRRES_00353,FGRRES_06150,	0.572783
aspartic-type endopeptidase activity	GO:0004190	7	0.197111	1.44765	7	28	1275	7383	FGRRES_03975,FGRRES_04758,FGRRES_05472,FGRRES_05471,FGRRES_09558,FGRRES_07775,FGRRES_16958_M,	0.581239
aspartic-type peptidase activity	GO:0070001	6	0.197111	1.44765	7	28	1275	7383	FGRRES_03975,FGRRES_04758,FGRRES_05472,FGRRES_05471,FGRRES_09558,FGRRES_07775,FGRRES_16958_M,	0.581239
oxidoreductase activity, acting on the CH-CH group of donors	GO:0016627	4	0.208072	1.27589	13	59	1275	7383	FGRRES_13137,FGRRES_17337,FGRRES_04143,FGRRES_16340_M,FGRRES_15680_M,FGRRES_00407,FGRRES_01981,FGRRES_11656,FGRRES_06606,FGRRES_17403,FGRRES_01618,FGRRES_08510,FGRRES_00003,	0.592158
small molecule binding	GO:0036094	3	0.203117	1.0457	253	1401	1275	7383	FGRRES_03603,FGRRES_16266,FGRRES_09639,FGRRES_09638,FGRRES_13137,FGRRES_10392,FGRRES_17398,FGRRES_06751,FGRRES_11492,FGRRES_13110,FGRRES_05733,FGRRES_00296,FGRRES_16299,FGRRES_00680,FGRRES_09681,FGRRES_09684,FGRRES_10725,FGRRES_02130,FGRRES_04256_M,FGRRES_06274,FGRRES_17372,FGRRES_07842,FGRRES_06127_M,FGRRES_03848_M,FGRRES_11407,FGRRES_04580,FGRRES_17337,FGRRES_17287_M,FGRRES_11019,FGRRES_02539,F…	0.595365
ribonuclease III activity	GO:0004525	9	0.207912	2.31624	2	5	1275	7383	FGRRES_09025,FGRRES_04408,	0.607601
double-stranded RNA-specific ribonuclease activity	GO:0032296	7	0.207912	2.31624	2	5	1275	7383	FGRRES_09025,FGRRES_04408,	0.607601
metal ion:proton antiporter activity	GO:0051139	11	0.207912	2.31624	2	5	1275	7383	FGRRES_01802,FGRRES_01606,	0.607601
mannan endo-1,6-alpha-mannosidase activity	GO:0008496	8	0.207912	2.31624	2	5	1275	7383	FGRRES_10387,FGRRES_17249,	0.607601
nuclear localization sequence binding	GO:0008139	6	0.207912	2.31624	2	5	1275	7383	FGRRES_01854,FGRRES_02233,	0.607601
NADPH-hemoprotein reductase activity	GO:0003958	6	0.207912	2.31624	2	5	1275	7383	FGRRES_01972,FGRRES_07596,	0.607601
DNA ligase activity	GO:0003909	5	0.207912	2.31624	2	5	1275	7383	FGRRES_05453_M,FGRRES_04154_M,	0.607601
calcium:proton antiporter activity	GO:0015369	11	0.207912	2.31624	2	5	1275	7383	FGRRES_01802,FGRRES_01606,	0.607601
calcium:cation antiporter activity	GO:0015368	10	0.207912	2.31624	2	5	1275	7383	FGRRES_01802,FGRRES_01606,	0.607601
dioxygenase activity	GO:0051213	4	0.215017	1.20902	19	91	1275	7383	FGRRES_10392,FGRRES_11440,FGRRES_11045,FGRRES_08081,FGRRES_08435,FGRRES_08821,FGRRES_00765,FGRRES_08358,FGRRES_09040,FGRRES_06001,FGRRES_16033,FGRRES_16031,FGRRES_13829,FGRRES_04828,FGRRES_04445_M,FGRRES_10065,FGRRES_00590,FGRRES_00589,FGRRES_00048,	0.610149
thioredoxin peroxidase activity	GO:0008379	4	0.0390288	3.47435	3	5	1275	7383	FGRRES_10296_M,FGRRES_00353,FGRRES_06150,	0.616278
phosphogluconate dehydrogenase (decarboxylating) activity	GO:0004616	6	0.0390288	3.47435	3	5	1275	7383	FGRRES_06852,FGRRES_16919,FGRRES_01111,	0.616278
phosphatidylinositol phosphate kinase activity	GO:0016307	6	0.0390288	3.47435	3	5	1275	7383	FGRRES_17518,FGRRES_05044,FGRRES_05045,	0.616278
NAD+ binding	GO:0070403	5	0.0416012	2.41275	5	12	1275	7383	FGRRES_03546,FGRRES_15918,FGRRES_13552,FGRRES_13963,FGRRES_12330,	0.626579
hydrolase activity, acting on carbon-nitrogen (but not peptide) bonds, in linear amides	GO:0016811	5	0.222655	1.36249	8	34	1275	7383	FGRRES_05739,FGRRES_00271,FGRRES_08908,FGRRES_17173_M,FGRRES_03933,FGRRES_13956,FGRRES_04819,FGRRES_04087_M,	0.629997
transcriptional activator activity, RNA polymerase II core promoter proximal region sequence-specific binding	GO:0001077	6	0.223332	1.44765	6	24	1275	7383	FGRRES_04288,FGRRES_09019,FGRRES_16816_M,FGRRES_11093,FGRRES_07020,FGRRES_04888_M,	0.630091
transcriptional activator activity, RNA polymerase II transcription regulatory region sequence-specific binding	GO:0001228	5	0.223332	1.44765	6	24	1275	7383	FGRRES_04288,FGRRES_09019,FGRRES_16816_M,FGRRES_11093,FGRRES_07020,FGRRES_04888_M,	0.630091
O-acyltransferase activity	GO:0008374	6	0.0425106	1.9302	8	24	1275	7383	FGRRES_07896,FGRRES_03392_M,FGRRES_04208,FGRRES_01349,FGRRES_03854_M,FGRRES_09863,FGRRES_07598,FGRRES_06688,	0.630574
substrate-specific transporter activity	GO:0022892	3	0.028453	1.19148	100	486	1275	7383	FGRRES_13127,FGRRES_16276,FGRRES_05723,FGRRES_09681,FGRRES_01785,FGRRES_09673,FGRRES_00646,FGRRES_10747,FGRRES_07832,FGRRES_11029,FGRRES_09297,FGRRES_03168,FGRRES_03111,FGRRES_11480,FGRRES_11069,FGRRES_16255,FGRRES_06685_M,FGRRES_04182,FGRRES_04178,FGRRES_01006,FGRRES_01407,FGRRES_08466,FGRRES_02066,FGRRES_09367,FGRRES_03934_M,FGRRES_08697_M,FGRRES_00768,FGRRES_00371,FGRRES_02400,FGRRES_00773,FGR…	0.633079
signal transducer activity	GO:0004871	2	0.226463	1.25463	13	60	1275	7383	FGRRES_01861,FGRRES_17256,FGRRES_10606,FGRRES_02449,FGRRES_16633,FGRRES_07235,FGRRES_00737,FGRRES_07623,FGRRES_00856,FGRRES_10042,FGRRES_09988,FGRRES_08540,FGRRES_07493,	0.635265
organic acid binding	GO:0043177	4	0.0439542	2.17147	6	16	1275	7383	FGRRES_09638,FGRRES_10392,FGRRES_05482,FGRRES_07075_M,FGRRES_00590,FGRRES_00589,	0.642257
carboxylic acid binding	GO:0031406	5	0.0439542	2.17147	6	16	1275	7383	FGRRES_09638,FGRRES_10392,FGRRES_05482,FGRRES_07075_M,FGRRES_00590,FGRRES_00589,	0.642257
intramolecular oxidoreductase activity	GO:0016860	4	0.318541	1.2868	6	27	1275	7383	FGRRES_07180_M,FGRRES_03066_M,FGRRES_05843,FGRRES_05330,FGRRES_13888,FGRRES_12746,	0.642994
damaged DNA binding	GO:0003684	6	0.318541	1.2868	6	27	1275	7383	FGRRES_00271,FGRRES_16767,FGRRES_12711,FGRRES_15847,FGRRES_10090,FGRRES_06721,	0.642994
glutamate dehydrogenase [NAD(P)+] activity	GO:0004353	6	0.0298039	5.79059	2	2	1275	7383	FGRRES_04117,FGRRES_07174,	0.6484
malic enzyme activity	GO:0004470	6	0.0298039	5.79059	2	2	1275	7383	FGRRES_07191,FGRRES_15784,	0.6484
malate dehydrogenase (decarboxylating) (NAD+) activity	GO:0004471	7	0.0298039	5.79059	2	2	1275	7383	FGRRES_07191,FGRRES_15784,	0.6484
nitrate reductase activity	GO:0008940	5	0.0298039	5.79059	2	2	1275	7383	FGRRES_17337,FGRRES_15910,	0.6484
L-proline transmembrane transporter activity	GO:0015193	7	0.0298039	5.79059	2	2	1275	7383	FGRRES_09297,FGRRES_11250,	0.6484
diacylglycerol O-acyltransferase activity	GO:0004144	8	0.0298039	5.79059	2	2	1275	7383	FGRRES_01349,FGRRES_06688,	0.6484
aromatase activity	GO:0070330	6	0.0298039	5.79059	2	2	1275	7383	FGRRES_01972,FGRRES_07596,	0.6484
CDP reductase activity	GO:0051063	8	0.0298039	5.79059	2	2	1275	7383	FGRRES_05409,FGRRES_05174,	0.6484
ribonucleoside-diphosphate reductase activity, thioredoxin disulfide as acceptor	GO:0004748	7	0.0298039	5.79059	2	2	1275	7383	FGRRES_05409,FGRRES_05174,	0.6484
galactose oxidase activity	GO:0045480	6	0.0298039	5.79059	2	2	1275	7383	FGRRES_11032,FGRRES_03569,	0.6484
oxidoreductase activity, acting on paired donors, with incorporation or reduction of molecular oxygen, reduced flavin or flavoprotein as one donor, and incorporation of one atom of oxygen	GO:0016712	5	0.0298039	5.79059	2	2	1275	7383	FGRRES_01972,FGRRES_07596,	0.6484
carbamoyl-phosphate synthase (glutamine-hydrolyzing) activity	GO:0004088	6	0.0298039	5.79059	2	2	1275	7383	FGRRES_09638,FGRRES_09554,	0.6484
nucleoside kinase activity	GO:0019206	7	0.0298039	5.79059	2	2	1275	7383	FGRRES_16741,FGRRES_02476,	0.6484
ribonucleoside-diphosphate reductase activity	GO:0061731	6	0.0298039	5.79059	2	2	1275	7383	FGRRES_05409,FGRRES_05174,	0.6484
oxidoreductase activity, acting on the CH-NH group of donors	GO:0016645	4	0.327399	1.31604	5	22	1275	7383	FGRRES_08462,FGRRES_00417,FGRRES_04886,FGRRES_01141,FGRRES_00979,	0.65816
regulatory region nucleic acid binding	GO:0001067	5	0.329271	1.21907	8	38	1275	7383	FGRRES_04288,FGRRES_09019,FGRRES_09565,FGRRES_16768_M,FGRRES_10868,FGRRES_16816_M,FGRRES_07020,FGRRES_04888_M,	0.660566
oxidoreductase activity, acting on a sulfur group of donors	GO:0016667	4	0.329271	1.21907	8	38	1275	7383	FGRRES_07180_M,FGRRES_03946,FGRRES_02482,FGRRES_07224,FGRRES_09833,FGRRES_12179_M,FGRRES_03259,FGRRES_08528,	0.660566
kinase activity	GO:0016301	5	0.333942	1.05583	64	351	1275	7383	FGRRES_03603,FGRRES_06368,FGRRES_17398,FGRRES_16299,FGRRES_10725,FGRRES_06206,FGRRES_16741,FGRRES_16693,FGRRES_01445,FGRRES_01430,FGRRES_08426,FGRRES_16964_M,FGRRES_07949,FGRRES_17656,FGRRES_00786,FGRRES_10211,FGRRES_10606,FGRRES_02449,FGRRES_06420,FGRRES_16633,FGRRES_02476,FGRRES_16560,FGRRES_08061_M,FGRRES_01329,FGRRES_01699_M,FGRRES_04287,FGRRES_00737,FGRRES_01312,FGRRES_06922,FGRRES_17518,FGR…	0.667203
ADP binding	GO:0043531	8	0.336204	1.36249	4	17	1275	7383	FGRRES_11019,FGRRES_17709_M,FGRRES_12595_M,FGRRES_16989_M,	0.670354
protein tyrosine phosphatase activity	GO:0004725	8	0.336204	1.36249	4	17	1275	7383	FGRRES_06297,FGRRES_06977,FGRRES_11979,FGRRES_04986,	0.670354
transferase activity, transferring hexosyl groups	GO:0016758	5	0.245261	1.18302	19	93	1275	7383	FGRRES_02527,FGRRES_09255,FGRRES_06822,FGRRES_08458,FGRRES_06856,FGRRES_15914_M,FGRRES_07946,FGRRES_15942_12076_M,FGRRES_16273_M,FGRRES_04278,FGRRES_01836,FGRRES_02714,FGRRES_10116,FGRRES_10117,FGRRES_01964,FGRRES_04313,FGRRES_09032_M,FGRRES_17491,FGRRES_08935,	0.672579
phosphotransferase activity, alcohol group as acceptor	GO:0016773	5	0.348444	1.06087	48	262	1275	7383	FGRRES_17398,FGRRES_16299,FGRRES_10725,FGRRES_06206,FGRRES_16741,FGRRES_16693,FGRRES_01445,FGRRES_01430,FGRRES_16964_M,FGRRES_17656,FGRRES_00786,FGRRES_10211,FGRRES_10606,FGRRES_02449,FGRRES_06420,FGRRES_16633,FGRRES_16560,FGRRES_13516,FGRRES_01329,FGRRES_04287,FGRRES_00737,FGRRES_01312,FGRRES_17518,FGRRES_16904,FGRRES_16905,FGRRES_13319,FGRRES_09408,FGRRES_07623,FGRRES_07812_M,FGRRES_16086,FGRRE…	0.675498
nutrient reservoir activity	GO:0045735	2	0.241684	1.73718	3	10	1275	7383	FGRRES_15935,FGRRES_11113,FGRRES_06612,	0.676024
terpene synthase activity	GO:0010333	6	0.241684	1.73718	3	10	1275	7383	FGRRES_10397,FGRRES_03537,FGRRES_15742,	0.676024
ammonium transmembrane transporter activity	GO:0008519	7	0.241684	1.73718	3	10	1275	7383	FGRRES_03111,FGRRES_04370,FGRRES_00529,	0.676024
voltage-gated channel activity	GO:0022832	7	0.241684	1.73718	3	10	1275	7383	FGRRES_04178,FGRRES_01364,FGRRES_11939,	0.676024
palmitoyltransferase activity	GO:0016409	6	0.241684	1.73718	3	10	1275	7383	FGRRES_04102,FGRRES_06542_M,FGRRES_08531,	0.676024
voltage-gated ion channel activity	GO:0005244	7	0.241684	1.73718	3	10	1275	7383	FGRRES_04178,FGRRES_01364,FGRRES_11939,	0.676024
C4-dicarboxylate transmembrane transporter activity	GO:0015556	8	0.241684	1.73718	3	10	1275	7383	FGRRES_01785,FGRRES_16461,FGRRES_07131,	0.676024
transferase activity, transferring acyl groups	GO:0016746	4	0.249298	1.11357	40	208	1275	7383	FGRRES_07893,FGRRES_07896,FGRRES_00237,FGRRES_03392_M,FGRRES_03149,FGRRES_04560,FGRRES_13873_M,FGRRES_06307,FGRRES_11884,FGRRES_04102,FGRRES_06542_M,FGRRES_00377,FGRRES_03006,FGRRES_09723,FGRRES_04208,FGRRES_09139_40_17163_M,FGRRES_01349,FGRRES_03854_M,FGRRES_13979,FGRRES_08700,FGRRES_15680_M,FGRRES_07600,FGRRES_01980,FGRRES_09863,FGRRES_11656,FGRRES_12746,FGRRES_07598,FGRRES_00117,FGRRES_07592,F…	0.677953
regulatory region DNA binding	GO:0000975	6	0.24815	1.32356	8	35	1275	7383	FGRRES_04288,FGRRES_09019,FGRRES_09565,FGRRES_16768_M,FGRRES_10868,FGRRES_16816_M,FGRRES_07020,FGRRES_04888_M,	0.6786
transcription regulatory region DNA binding	GO:0044212	7	0.24815	1.32356	8	35	1275	7383	FGRRES_04288,FGRRES_09019,FGRRES_09565,FGRRES_16768_M,FGRRES_10868,FGRRES_16816_M,FGRRES_07020,FGRRES_04888_M,	0.6786
cation binding	GO:0043169	4	0.34287	1.02103	286	1622	1275	7383	FGRRES_09638,FGRRES_02803,FGRRES_00297,FGRRES_00696,FGRRES_10392,FGRRES_09622,FGRRES_00278,FGRRES_13110,FGRRES_05733,FGRRES_02881_M,FGRRES_09261,FGRRES_02117,FGRRES_02119,FGRRES_09681,FGRRES_02522,FGRRES_00271,FGRRES_17372,FGRRES_02111,FGRRES_17377,FGRRES_00249,FGRRES_00217,FGRRES_17323,FGRRES_11032,FGRRES_16723,FGRRES_17337,FGRRES_02531,FGRRES_11411,FGRRES_03683,FGRRES_16703,FGRRES_12935,FGRRES_…	0.679493
adenyl ribonucleotide binding	GO:0032559	7	0.342358	1.03551	125	699	1275	7383	FGRRES_09638,FGRRES_17398,FGRRES_16299,FGRRES_00680,FGRRES_09681,FGRRES_10725,FGRRES_02130,FGRRES_17372,FGRRES_04580,FGRRES_11019,FGRRES_17709_M,FGRRES_02540,FGRRES_06206,FGRRES_16751,FGRRES_16693,FGRRES_01445,FGRRES_08830,FGRRES_06804,FGRRES_04181,FGRRES_02035,FGRRES_12595_M,FGRRES_04177,FGRRES_14031_M,FGRRES_02025,FGRRES_02026,FGRRES_02870,FGRRES_05687,FGRRES_08466,FGRRES_16145,FGRRES_15914_M,F…	0.679856
potassium ion transmembrane transporter activity	GO:0015079	9	0.344032	1.44765	3	12	1275	7383	FGRRES_04178,FGRRES_16803,FGRRES_01606,	0.680419
metal ion binding	GO:0046872	5	0.345242	1.02081	284	1611	1275	7383	FGRRES_09638,FGRRES_02803,FGRRES_00297,FGRRES_00696,FGRRES_10392,FGRRES_09622,FGRRES_00278,FGRRES_13110,FGRRES_05733,FGRRES_02881_M,FGRRES_09261,FGRRES_02117,FGRRES_02119,FGRRES_09681,FGRRES_02522,FGRRES_00271,FGRRES_17372,FGRRES_02111,FGRRES_17377,FGRRES_00249,FGRRES_00217,FGRRES_17323,FGRRES_11032,FGRRES_16723,FGRRES_17337,FGRRES_02531,FGRRES_11411,FGRRES_03683,FGRRES_16703,FGRRES_12935,FGRRES_…	0.681436
cysteine-type endopeptidase activity	GO:0004197	7	0.252171	1.54416	4	15	1275	7383	FGRRES_17681_M,FGRRES_15901,FGRRES_04840,FGRRES_02645,	0.681976
ATP-dependent RNA helicase activity	GO:0004004	10	0.252171	1.54416	4	15	1275	7383	FGRRES_05687,FGRRES_16145,FGRRES_02752,FGRRES_04350,	0.681976
glucosidase activity	GO:0015926	6	0.2516	1.35114	7	30	1275	7383	FGRRES_00299,FGRRES_08623_M,FGRRES_12586,FGRRES_03570_M,FGRRES_17402,FGRRES_02632,FGRRES_11181,	0.682316
ATPase activity, coupled	GO:0042623	9	0.255419	1.11973	35	181	1275	7383	FGRRES_09681,FGRRES_04580,FGRRES_02540,FGRRES_08830,FGRRES_02870,FGRRES_05687,FGRRES_08466,FGRRES_06874,FGRRES_16145,FGRRES_02400,FGRRES_03032,FGRRES_16114,FGRRES_09707,FGRRES_02752,FGRRES_03882,FGRRES_02316,FGRRES_12711,FGRRES_10995,FGRRES_11272,FGRRES_12704,FGRRES_16504,FGRRES_04350,FGRRES_06881_M,FGRRES_09515,FGRRES_16825,FGRRES_03323,FGRRES_02677,FGRRES_15855_M,FGRRES_08595,FGRRES_06721,FGRRE…	0.683212
oxidoreductase activity, acting on the CH-NH2 group of donors	GO:0016638	4	0.254102	1.38974	6	25	1275	7383	FGRRES_09639,FGRRES_04117,FGRRES_17247,FGRRES_10677,FGRRES_07174,FGRRES_03278,	0.683422
cellulose binding	GO:0030248	5	0.25486	1.44765	5	20	1275	7383	FGRRES_08003,FGRRES_10670,FGRRES_13834,FGRRES_03795,FGRRES_02658,	0.683582
succinate dehydrogenase activity	GO:0000104	5	0.347162	1.65445	2	7	1275	7383	FGRRES_13137,FGRRES_01981,	0.683847
malate transmembrane transporter activity	GO:0015140	9	0.347162	1.65445	2	7	1275	7383	FGRRES_01785,FGRRES_16461,	0.683847
organic cation transmembrane transporter activity	GO:0015101	7	0.347162	1.65445	2	7	1275	7383	FGRRES_03111,FGRRES_04370,	0.683847
cofactor transporter activity	GO:0051184	3	0.347162	1.65445	2	7	1275	7383	FGRRES_13127,FGRRES_11069,	0.683847
protein tyrosine kinase activity	GO:0004713	7	0.347162	1.65445	2	7	1275	7383	FGRRES_16299,FGRRES_16693,	0.683847
phosphoprotein binding	GO:0051219	4	0.347162	1.65445	2	7	1275	7383	FGRRES_09279,FGRRES_06948,	0.683847
phosphotransferase activity, carboxyl group as acceptor	GO:0016774	5	0.347162	1.65445	2	7	1275	7383	FGRRES_08426,FGRRES_15842,	0.683847
ether hydrolase activity	GO:0016803	5	0.347162	1.65445	2	7	1275	7383	FGRRES_01765,FGRRES_03812,	0.683847
transferase activity, transferring glycosyl groups	GO:0016757	4	0.356368	1.08091	28	150	1275	7383	FGRRES_02527,FGRRES_09255,FGRRES_11467,FGRRES_06822,FGRRES_08458,FGRRES_06856,FGRRES_15914_M,FGRRES_05809,FGRRES_07946,FGRRES_03938,FGRRES_15942_12076_M,FGRRES_04233,FGRRES_16273_M,FGRRES_04278,FGRRES_01836,FGRRES_13169,FGRRES_17509,FGRRES_02714,FGRRES_10116,FGRRES_10117,FGRRES_01964,FGRRES_04313,FGRRES_09032_M,FGRRES_05924,FGRRES_10418,FGRRES_17491,FGRRES_15704,FGRRES_08935,	0.689495
N,N-dimethylaniline monooxygenase activity	GO:0004499	6	0.364484	1.25882	5	23	1275	7383	FGRRES_11492,FGRRES_06478,FGRRES_06539,FGRRES_13875,FGRRES_16897,	0.703806
motor activity	GO:0003774	8	0.364484	1.25882	5	23	1275	7383	FGRRES_15914_M,FGRRES_06149,FGRRES_01964,FGRRES_16336,FGRRES_15772,	0.703806
transcription factor activity, RNA polymerase II core promoter proximal region sequence-specific binding	GO:0000982	5	0.0500227	1.79708	9	29	1275	7383	FGRRES_04288,FGRRES_12970_M,FGRRES_09019,FGRRES_09565,FGRRES_16768_M,FGRRES_16816_M,FGRRES_11093,FGRRES_07020,FGRRES_04888_M,	0.709743
adenyl nucleotide binding	GO:0030554	6	0.369558	1.02962	125	703	1275	7383	FGRRES_09638,FGRRES_17398,FGRRES_16299,FGRRES_00680,FGRRES_09681,FGRRES_10725,FGRRES_02130,FGRRES_17372,FGRRES_04580,FGRRES_11019,FGRRES_17709_M,FGRRES_02540,FGRRES_06206,FGRRES_16751,FGRRES_16693,FGRRES_01445,FGRRES_08830,FGRRES_06804,FGRRES_04181,FGRRES_02035,FGRRES_12595_M,FGRRES_04177,FGRRES_14031_M,FGRRES_02025,FGRRES_02026,FGRRES_02870,FGRRES_05687,FGRRES_08466,FGRRES_16145,FGRRES_15914_M,F…	0.7108
ion binding	GO:0043167	3	0.373639	1.0118	473	2707	1275	7383	FGRRES_03603,FGRRES_16266,FGRRES_09639,FGRRES_09638,FGRRES_02803,FGRRES_00297,FGRRES_13137,FGRRES_00696,FGRRES_10392,FGRRES_17398,FGRRES_06751,FGRRES_11492,FGRRES_09622,FGRRES_00278,FGRRES_13110,FGRRES_05733,FGRRES_00296,FGRRES_16299,FGRRES_08485,FGRRES_02881_M,FGRRES_00680,FGRRES_09261,FGRRES_02117,FGRRES_02119,FGRRES_09681,FGRRES_09684,FGRRES_02522,FGRRES_00271,FGRRES_10725,FGRRES_02130,FGRRES_…	0.717241
alpha-mannosidase activity	GO:0004559	7	0.378806	1.2868	4	18	1275	7383	FGRRES_10387,FGRRES_16723,FGRRES_17249,FGRRES_04930,	0.725736
oxidoreductase activity, acting on the CH-NH2 group of donors, oxygen as acceptor	GO:0016641	5	0.378806	1.2868	4	18	1275	7383	FGRRES_09639,FGRRES_17247,FGRRES_10677,FGRRES_03278,	0.725736
telomeric DNA binding	GO:0042162	7	0.378806	1.2868	4	18	1275	7383	FGRRES_01699_M,FGRRES_12711,FGRRES_06721,FGRRES_01157,	0.725736
hydrolase activity, hydrolyzing O-glycosyl compounds	GO:0004553	5	0.0542522	1.24262	50	233	1275	7383	FGRRES_02807,FGRRES_00299,FGRRES_10387,FGRRES_09289,FGRRES_16723,FGRRES_08623_M,FGRRES_03212,FGRRES_04143,FGRRES_12586,FGRRES_08003,FGRRES_07921,FGRRES_05851,FGRRES_06888,FGRRES_06119,FGRRES_17249,FGRRES_05400,FGRRES_03570_M,FGRRES_03904,FGRRES_05330,FGRRES_12488,FGRRES_08395_M,FGRRES_10670,FGRRES_02067_M,FGRRES_08253,FGRRES_01596,FGRRES_07892_M,FGRRES_13883,FGRRES_05757_M,FGRRES_01283,FGRRES_138…	0.727574
ATP binding	GO:0005524	8	0.382798	1.02736	121	682	1275	7383	FGRRES_09638,FGRRES_17398,FGRRES_16299,FGRRES_00680,FGRRES_09681,FGRRES_10725,FGRRES_02130,FGRRES_17372,FGRRES_04580,FGRRES_02540,FGRRES_06206,FGRRES_16751,FGRRES_16693,FGRRES_01445,FGRRES_08830,FGRRES_06804,FGRRES_04181,FGRRES_02035,FGRRES_04177,FGRRES_14031_M,FGRRES_02025,FGRRES_02026,FGRRES_02870,FGRRES_05687,FGRRES_08466,FGRRES_16145,FGRRES_15914_M,FGRRES_16964_M,FGRRES_06149,FGRRES_17656,FGR…	0.729103
thiamine pyrophosphate binding	GO:0030976	5	0.0537684	2.57359	4	9	1275	7383	FGRRES_04309,FGRRES_13946,FGRRES_01086,FGRRES_10446,	0.731101
ATPase activity, coupled to movement of substances	GO:0043492	10	0.0530575	1.37871	25	105	1275	7383	FGRRES_09681,FGRRES_04580,FGRRES_08830,FGRRES_02870,FGRRES_08466,FGRRES_02400,FGRRES_03032,FGRRES_16114,FGRRES_09707,FGRRES_03882,FGRRES_02316,FGRRES_10995,FGRRES_11272,FGRRES_12704,FGRRES_06881_M,FGRRES_09515,FGRRES_16825,FGRRES_03323,FGRRES_02677,FGRRES_15855_M,FGRRES_08595,FGRRES_00046,FGRRES_05527,FGRRES_02139,FGRRES_05589,	0.731596
cysteine-type peptidase activity	GO:0008234	6	0.385608	1.15812	8	40	1275	7383	FGRRES_17681_M,FGRRES_01863,FGRRES_15901,FGRRES_04840,FGRRES_08668,FGRRES_13502_3_M,FGRRES_05026,FGRRES_02645,	0.73303
carbon-nitrogen ligase activity, with glutamine as amido-N-donor	GO:0016884	5	0.385608	1.15812	8	40	1275	7383	FGRRES_09638,FGRRES_08078,FGRRES_09337,FGRRES_03938,FGRRES_09139_40_17163_M,FGRRES_09934,FGRRES_02228,FGRRES_09554,	0.73303
calcium ion transmembrane transporter activity	GO:0015085	9	0.0563275	1.9302	7	21	1275	7383	FGRRES_04178,FGRRES_02400,FGRRES_01364,FGRRES_01802,FGRRES_01606,FGRRES_09515,FGRRES_11939,	0.735262
acetyltransferase activity	GO:0016407	6	0.438619	1.05283	20	110	1275	7383	FGRRES_07893,FGRRES_07896,FGRRES_03392_M,FGRRES_03149,FGRRES_13873_M,FGRRES_06307,FGRRES_00377,FGRRES_09723,FGRRES_04208,FGRRES_09139_40_17163_M,FGRRES_03854_M,FGRRES_13979,FGRRES_07600,FGRRES_01980,FGRRES_07598,FGRRES_00117,FGRRES_07592,FGRRES_00280_M,FGRRES_20330,FGRRES_10069,	0.736548
antiporter activity	GO:0015297	6	0.438511	1.15812	5	25	1275	7383	FGRRES_03080,FGRRES_01802,FGRRES_06579,FGRRES_07131,FGRRES_01606,	0.737632
ATPase activity, coupled to transmembrane movement of substances	GO:0042626	7	0.0527567	1.38974	24	100	1275	7383	FGRRES_09681,FGRRES_04580,FGRRES_08830,FGRRES_02870,FGRRES_08466,FGRRES_02400,FGRRES_03032,FGRRES_16114,FGRRES_09707,FGRRES_03882,FGRRES_02316,FGRRES_10995,FGRRES_11272,FGRRES_12704,FGRRES_06881_M,FGRRES_09515,FGRRES_16825,FGRRES_03323,FGRRES_02677,FGRRES_15855_M,FGRRES_00046,FGRRES_05527,FGRRES_02139,FGRRES_05589,	0.737841
UDP-glucosyltransferase activity	GO:0035251	6	0.277785	1.9302	2	6	1275	7383	FGRRES_06822,FGRRES_07946,	0.741011
cholestenol delta-isomerase activity	GO:0047750	6	0.277785	1.9302	2	6	1275	7383	FGRRES_13888,FGRRES_12746,	0.741011
solute:proton symporter activity	GO:0015295	8	0.277785	1.9302	2	6	1275	7383	FGRRES_04204,FGRRES_07587,	0.741011
protein-cysteine S-palmitoyltransferase activity	GO:0019706	7	0.277785	1.9302	2	6	1275	7383	FGRRES_06542_M,FGRRES_08531,	0.741011
protein-cysteine S-acyltransferase activity	GO:0019707	7	0.277785	1.9302	2	6	1275	7383	FGRRES_06542_M,FGRRES_08531,	0.741011
oxidoreductase activity, acting on the aldehyde or oxo group of donors, disulfide as acceptor	GO:0016624	5	0.277785	1.9302	2	6	1275	7383	FGRRES_09240,FGRRES_04309,	0.741011
racemase and epimerase activity, acting on carbohydrates and derivatives	GO:0016857	5	0.277785	1.9302	2	6	1275	7383	FGRRES_00590,FGRRES_00589,	0.741011
ammonia-lyase activity	GO:0016841	5	0.277785	1.9302	2	6	1275	7383	FGRRES_00296,FGRRES_09311,	0.741011
ligase activity, forming phosphoric ester bonds	GO:0016886	4	0.277785	1.9302	2	6	1275	7383	FGRRES_05453_M,FGRRES_04154_M,	0.741011
cis-stilbene-oxide hydrolase activity	GO:0033961	6	0.277785	1.9302	2	6	1275	7383	FGRRES_01765,FGRRES_03812,	0.741011
S-methyltransferase activity	GO:0008172	6	0.277785	1.9302	2	6	1275	7383	FGRRES_17503,FGRRES_10825,	0.741011
monocarboxylic acid transmembrane transporter activity	GO:0008028	7	0.277785	1.9302	2	6	1275	7383	FGRRES_04204,FGRRES_04319,	0.741011
DNA N-glycosylase activity	GO:0019104	6	0.277785	1.9302	2	6	1275	7383	FGRRES_16767,FGRRES_10090,	0.741011
signaling receptor activity	GO:0038023	3	0.056121	1.70311	10	34	1275	7383	FGRRES_01861,FGRRES_17256,FGRRES_10606,FGRRES_02449,FGRRES_00737,FGRRES_07623,FGRRES_00856,FGRRES_10042,FGRRES_08540,FGRRES_07493,	0.742466
solute:cation symporter activity	GO:0015294	7	0.445096	1.24084	3	14	1275	7383	FGRRES_04204,FGRRES_10531,FGRRES_07587,	0.746146
symporter activity	GO:0015293	6	0.445096	1.24084	3	14	1275	7383	FGRRES_04204,FGRRES_10531,FGRRES_07587,	0.746146
transmembrane signaling receptor activity	GO:0004888	4	0.445096	1.24084	3	14	1275	7383	FGRRES_01861,FGRRES_17256,FGRRES_10042,	0.746146
transmembrane receptor activity	GO:0099600	4	0.445096	1.24084	3	14	1275	7383	FGRRES_01861,FGRRES_17256,FGRRES_10042,	0.746146
transferase activity, transferring pentosyl groups	GO:0016763	5	0.290731	1.37871	5	21	1275	7383	FGRRES_08458,FGRRES_03938,FGRRES_17509,FGRRES_05924,FGRRES_15704,	0.74705
nucleobase-containing compound kinase activity	GO:0019205	6	0.293804	1.44765	4	16	1275	7383	FGRRES_16741,FGRRES_02476,FGRRES_01699_M,FGRRES_05174,	0.747101
protein kinase activity	GO:0004672	6	0.290309	1.10147	35	184	1275	7383	FGRRES_17398,FGRRES_16299,FGRRES_10725,FGRRES_06206,FGRRES_16693,FGRRES_16964_M,FGRRES_00786,FGRRES_10606,FGRRES_02449,FGRRES_06420,FGRRES_16633,FGRRES_16560,FGRRES_00737,FGRRES_01312,FGRRES_16904,FGRRES_16905,FGRRES_13319,FGRRES_09408,FGRRES_07623,FGRRES_07812_M,FGRRES_16086,FGRRES_07150,FGRRES_00469,FGRRES_16505,FGRRES_04814,FGRRES_00856,FGRRES_17001,FGRRES_07742,FGRRES_10042,FGRRES_16411,FGRRE…	0.747928
gated channel activity	GO:0022836	6	0.39513	1.33629	3	13	1275	7383	FGRRES_04178,FGRRES_01364,FGRRES_11939,	0.748225
galactosidase activity	GO:0015925	6	0.39513	1.33629	3	13	1275	7383	FGRRES_03904,FGRRES_16875,FGRRES_03343,	0.748225
dicarboxylic acid transmembrane transporter activity	GO:0005310	7	0.39513	1.33629	3	13	1275	7383	FGRRES_01785,FGRRES_16461,FGRRES_07131,	0.748225
ATPase activity, coupled to transmembrane movement of ions, phosphorylative mechanism	GO:0015662	8	0.39513	1.33629	3	13	1275	7383	FGRRES_09681,FGRRES_02400,FGRRES_09515,	0.748225
sodium ion transmembrane transporter activity	GO:0015081	9	0.29257	1.57925	3	11	1275	7383	FGRRES_04178,FGRRES_10531,FGRRES_01606,	0.749805
aldehyde-lyase activity	GO:0016832	5	0.29257	1.57925	3	11	1275	7383	FGRRES_06328,FGRRES_05335,FGRRES_06553,	0.749805
glucosyltransferase activity	GO:0046527	6	0.29257	1.57925	3	11	1275	7383	FGRRES_02527,FGRRES_06822,FGRRES_07946,	0.749805
O-acetyltransferase activity	GO:0016413	7	0.0582549	2.22715	5	13	1275	7383	FGRRES_07896,FGRRES_03392_M,FGRRES_04208,FGRRES_03854_M,FGRRES_07598,	0.750415
mannosyltransferase activity	GO:0000030	6	0.401629	1.20637	5	24	1275	7383	FGRRES_09255,FGRRES_06856,FGRRES_04278,FGRRES_02714,FGRRES_08935,	0.754693
inorganic anion transmembrane transporter activity	GO:0015103	7	0.401629	1.20637	5	24	1275	7383	FGRRES_01006,FGRRES_06579,FGRRES_00416,FGRRES_01066,FGRRES_06815_M,	0.754693
polysaccharide binding	GO:0030247	4	0.401629	1.20637	5	24	1275	7383	FGRRES_08003,FGRRES_10670,FGRRES_13834,FGRRES_03795,FGRRES_02658,	0.754693
2 iron, 2 sulfur cluster binding	GO:0051537	5	0.401629	1.20637	5	24	1275	7383	FGRRES_00278,FGRRES_08821,FGRRES_08402,FGRRES_02433,FGRRES_16376,	0.754693
pattern binding	GO:0001871	3	0.401629	1.20637	5	24	1275	7383	FGRRES_08003,FGRRES_10670,FGRRES_13834,FGRRES_03795,FGRRES_02658,	0.754693
NAD binding	GO:0051287	5	0.0596895	1.46925	17	67	1275	7383	FGRRES_05733,FGRRES_06127_M,FGRRES_04143,FGRRES_08426,FGRRES_09344,FGRRES_02407,FGRRES_02427,FGRRES_03546,FGRRES_15918,FGRRES_13552,FGRRES_13963,FGRRES_16919,FGRRES_07191,FGRRES_12330,FGRRES_17403,FGRRES_07707,FGRRES_15784,	0.75891
carbon-oxygen lyase activity	GO:0016835	4	0.456569	1.06025	13	71	1275	7383	FGRRES_10397,FGRRES_02717_M,FGRRES_06477,FGRRES_03537,FGRRES_01346,FGRRES_04287,FGRRES_06544,FGRRES_10198,FGRRES_05482,FGRRES_08194,FGRRES_10080,FGRRES_15742,FGRRES_09589,	0.760171
FAD binding	GO:0071949	6	0.459331	1.07233	10	54	1275	7383	FGRRES_11081,FGRRES_00765,FGRRES_01819_M,FGRRES_03824,FGRRES_03370,FGRRES_04368,FGRRES_13839,FGRRES_07562,FGRRES_03259,FGRRES_04969,	0.763471
oxidoreductase activity, acting on paired donors, with incorporation or reduction of molecular oxygen, 2-oxoglutarate as one donor, and incorporation of one atom each of oxygen into both donors	GO:0016706	5	0.418374	1.15812	6	30	1275	7383	FGRRES_10392,FGRRES_11440,FGRRES_08081,FGRRES_00590,FGRRES_00589,FGRRES_00048,	0.76702
prenyltransferase activity	GO:0004659	5	0.462668	1.15812	4	20	1275	7383	FGRRES_00298,FGRRES_03066_M,FGRRES_17725,FGRRES_10933,	0.767715
phosphotransferase activity, phosphate group as acceptor	GO:0016776	5	0.462668	1.15812	4	20	1275	7383	FGRRES_03603,FGRRES_01699_M,FGRRES_05079,FGRRES_05174,	0.767715
RNA helicase activity	GO:0003724	9	0.462668	1.15812	4	20	1275	7383	FGRRES_05687,FGRRES_16145,FGRRES_02752,FGRRES_04350,	0.767715
carbohydrate derivative binding	GO:0097367	3	0.419662	1.01657	158	900	1275	7383	FGRRES_16266,FGRRES_09639,FGRRES_09638,FGRRES_17398,FGRRES_16299,FGRRES_00680,FGRRES_09681,FGRRES_09684,FGRRES_10725,FGRRES_02130,FGRRES_06274,FGRRES_17372,FGRRES_07842,FGRRES_03848_M,FGRRES_04580,FGRRES_11019,FGRRES_17709_M,FGRRES_02540,FGRRES_06206,FGRRES_16751,FGRRES_16693,FGRRES_01445,FGRRES_03595,FGRRES_01027,FGRRES_08830,FGRRES_06804,FGRRES_04181,FGRRES_02035,FGRRES_12595_M,FGRRES_04177,FGR…	0.767942
RNA-dependent ATPase activity	GO:0008186	10	0.421106	1.21907	4	19	1275	7383	FGRRES_05687,FGRRES_16145,FGRRES_02752,FGRRES_04350,	0.769147
UDP-N-acetylmuramate dehydrogenase activity	GO:0008762	6	0.46632	1.06161	11	60	1275	7383	FGRRES_03603,FGRRES_13110,FGRRES_03593,FGRRES_10609,FGRRES_04732,FGRRES_16027,FGRRES_16026,FGRRES_08694,FGRRES_05921,FGRRES_03307,FGRRES_00003,	0.769861
catalase activity	GO:0004096	4	0.414134	1.44765	2	8	1275	7383	FGRRES_02881_M,FGRRES_06596,	0.770793
sequence-specific single stranded DNA binding	GO:0098847	7	0.414134	1.44765	2	8	1275	7383	FGRRES_01699_M,FGRRES_01157,	0.770793
secondary active sulfate transmembrane transporter activity	GO:0008271	9	0.414134	1.44765	2	8	1275	7383	FGRRES_01006,FGRRES_01066,	0.770793
G-protein coupled receptor activity	GO:0004930	5	0.414134	1.44765	2	8	1275	7383	FGRRES_01861,FGRRES_17256,	0.770793
single-stranded telomeric DNA binding	GO:0043047	8	0.414134	1.44765	2	8	1275	7383	FGRRES_01699_M,FGRRES_01157,	0.770793
amino acid binding	GO:0016597	6	0.414134	1.44765	2	8	1275	7383	FGRRES_09638,FGRRES_05482,	0.770793
hydrolase activity, acting on ether bonds	GO:0016801	4	0.414134	1.44765	2	8	1275	7383	FGRRES_01765,FGRRES_03812,	0.770793
intramolecular oxidoreductase activity, transposing C=C bonds	GO:0016863	5	0.414134	1.44765	2	8	1275	7383	FGRRES_13888,FGRRES_12746,	0.770793
vitamin binding	GO:0019842	4	0.469295	1.03243	23	129	1275	7383	FGRRES_10392,FGRRES_06751,FGRRES_00296,FGRRES_04256_M,FGRRES_04102,FGRRES_08821,FGRRES_12518,FGRRES_17216,FGRRES_04309,FGRRES_15673_M,FGRRES_13946,FGRRES_07606,FGRRES_01177,FGRRES_01573,FGRRES_03391,FGRRES_07075_M,FGRRES_03747,FGRRES_01086,FGRRES_00590,FGRRES_00589,FGRRES_03257,FGRRES_10464,FGRRES_10446,	0.773468
core promoter proximal region sequence-specific DNA binding	GO:0000987	9	0.0800307	1.71573	8	27	1275	7383	FGRRES_04288,FGRRES_09019,FGRRES_09565,FGRRES_16768_M,FGRRES_10868,FGRRES_16816_M,FGRRES_07020,FGRRES_04888_M,	0.783501
RNA polymerase II core promoter proximal region sequence-specific DNA binding	GO:0000978	10	0.0800307	1.71573	8	27	1275	7383	FGRRES_04288,FGRRES_09019,FGRRES_09565,FGRRES_16768_M,FGRRES_10868,FGRRES_16816_M,FGRRES_07020,FGRRES_04888_M,	0.783501
core promoter proximal region DNA binding	GO:0001159	8	0.0800307	1.71573	8	27	1275	7383	FGRRES_04288,FGRRES_09019,FGRRES_09565,FGRRES_16768_M,FGRRES_10868,FGRRES_16816_M,FGRRES_07020,FGRRES_04888_M,	0.783501
alpha-1,6-mannosyltransferase activity	GO:0000009	7	0.477461	1.2868	2	9	1275	7383	FGRRES_06856,FGRRES_04278,	0.785604
polyamine transmembrane transporter activity	GO:0015203	5	0.477461	1.2868	2	9	1275	7383	FGRRES_03111,FGRRES_04370,	0.785604
sulfate transmembrane transporter activity	GO:0015116	8	0.477461	1.2868	2	9	1275	7383	FGRRES_01006,FGRRES_01066,	0.785604
2-dehydropantoate 2-reductase activity	GO:0008677	6	0.477461	1.2868	2	9	1275	7383	FGRRES_02539,FGRRES_08667,	0.785604
primary amine oxidase activity	GO:0008131	6	0.477461	1.2868	2	9	1275	7383	FGRRES_10677,FGRRES_03278,	0.785604
cation:cation antiporter activity	GO:0015491	8	0.477461	1.2868	2	9	1275	7383	FGRRES_01802,FGRRES_01606,	0.785604
histone methyltransferase activity	GO:0042054	7	0.477461	1.2868	2	9	1275	7383	FGRRES_01870,FGRRES_09564,	0.785604
transaminase activity	GO:0008483	5	0.310018	1.20637	10	48	1275	7383	FGRRES_06751,FGRRES_04256_M,FGRRES_01766,FGRRES_04570,FGRRES_12518,FGRRES_01199,FGRRES_01573,FGRRES_10893_M,FGRRES_05481,FGRRES_00049,	0.786288
transferase activity, transferring nitrogenous groups	GO:0016769	4	0.310018	1.20637	10	48	1275	7383	FGRRES_06751,FGRRES_04256_M,FGRRES_01766,FGRRES_04570,FGRRES_12518,FGRRES_01199,FGRRES_01573,FGRRES_10893_M,FGRRES_05481,FGRRES_00049,	0.786288
ATPase activity	GO:0016887	8	0.432573	1.03318	43	241	1275	7383	FGRRES_09681,FGRRES_04580,FGRRES_02540,FGRRES_08830,FGRRES_04181,FGRRES_02025,FGRRES_02026,FGRRES_02870,FGRRES_05687,FGRRES_08466,FGRRES_06874,FGRRES_16145,FGRRES_02400,FGRRES_03032,FGRRES_16114,FGRRES_09707,FGRRES_08343,FGRRES_02752,FGRRES_03882,FGRRES_02316,FGRRES_07165,FGRRES_12711,FGRRES_10995,FGRRES_11272,FGRRES_12704,FGRRES_16504,FGRRES_04350,FGRRES_06881_M,FGRRES_09515,FGRRES_06692,FGRRES_…	0.788621
homogentisate 1,2-dioxygenase activity	GO:0004411	6	0.433811	1.9302	1	3	1275	7383	FGRRES_08358,	0.789407
anaphase-promoting complex binding	GO:0010997	5	0.433811	1.9302	1	3	1275	7383	FGRRES_00660,	0.789407
glycerone kinase activity	GO:0004371	6	0.433811	1.9302	1	3	1275	7383	FGRRES_07017,	0.789407
isocitrate dehydrogenase (NAD+) activity	GO:0004449	7	0.433811	1.9302	1	3	1275	7383	FGRRES_05733,	0.789407
nitric oxide dioxygenase activity	GO:0008941	6	0.433811	1.9302	1	3	1275	7383	FGRRES_00765,	0.789407
methylenetetrahydrofolate dehydrogenase (NADP+) activity	GO:0004488	6	0.433811	1.9302	1	3	1275	7383	FGRRES_00417,	0.789407
acyl-CoA hydrolase activity	GO:0047617	7	0.433811	1.9302	1	3	1275	7383	FGRRES_02848,	0.789407
L-valine transaminase activity	GO:0052655	7	0.433811	1.9302	1	3	1275	7383	FGRRES_04570,	0.789407
L-leucine transaminase activity	GO:0052654	7	0.433811	1.9302	1	3	1275	7383	FGRRES_04570,	0.789407
amino-acid racemase activity	GO:0047661	7	0.433811	1.9302	1	3	1275	7383	FGRRES_16921,	0.789407
nucleotide diphosphatase activity	GO:0004551	7	0.433811	1.9302	1	3	1275	7383	FGRRES_09805,	0.789407
L-isoleucine transaminase activity	GO:0052656	7	0.433811	1.9302	1	3	1275	7383	FGRRES_04570,	0.789407
NEDD8 transferase activity	GO:0019788	5	0.433811	1.9302	1	3	1275	7383	FGRRES_10117,	0.789407
copper uptake transmembrane transporter activity	GO:0015088	11	0.433811	1.9302	1	3	1275	7383	FGRRES_01230,	0.789407
fumarylacetoacetase activity	GO:0004334	6	0.433811	1.9302	1	3	1275	7383	FGRRES_02851,	0.789407
MAP kinase kinase kinase kinase activity	GO:0008349	9	0.433811	1.9302	1	3	1275	7383	FGRRES_16633,	0.789407
phosphomevalonate kinase activity	GO:0004631	6	0.433811	1.9302	1	3	1275	7383	FGRRES_03603,	0.789407
proline dehydrogenase activity	GO:0004657	5	0.433811	1.9302	1	3	1275	7383	FGRRES_04886,	0.789407
MAP kinase kinase kinase activity	GO:0004709	9	0.433811	1.9302	1	3	1275	7383	FGRRES_16633,	0.789407
ion gated channel activity	GO:0022839	7	0.433811	1.9302	1	3	1275	7383	FGRRES_04178,	0.789407
rRNA (guanine) methyltransferase activity	GO:0016435	8	0.433811	1.9302	1	3	1275	7383	FGRRES_10175,	0.789407
calcium-dependent phospholipid binding	GO:0005544	5	0.433811	1.9302	1	3	1275	7383	FGRRES_08739_M,	0.789407
calcium activated cation channel activity	GO:0005227	8	0.433811	1.9302	1	3	1275	7383	FGRRES_04178,	0.789407
hydrolase activity, acting on acid halide bonds	GO:0016824	4	0.433811	1.9302	1	3	1275	7383	FGRRES_10113,	0.789407
ribonuclease T2 activity	GO:0033897	9	0.433811	1.9302	1	3	1275	7383	FGRRES_03379,	0.789407
oxidoreductase activity, acting on the CH-NH group of donors, oxygen as acceptor	GO:0016647	5	0.433811	1.9302	1	3	1275	7383	FGRRES_08462,	0.789407
oxidoreductase activity, acting on paired donors, with oxidation of a pair of donors resulting in the reduction of molecular oxygen to two molecules of water	GO:0016717	5	0.433811	1.9302	1	3	1275	7383	FGRRES_05784,	0.789407
potassium channel activity	GO:0005267	8	0.433811	1.9302	1	3	1275	7383	FGRRES_04178,	0.789407
hydrolase activity, acting on acid halide bonds, in C-halide compounds	GO:0019120	5	0.433811	1.9302	1	3	1275	7383	FGRRES_10113,	0.789407
L-xylulose reductase (NADP+) activity	GO:0050038	6	0.433811	1.9302	1	3	1275	7383	FGRRES_06104,	0.789407
G-protein coupled receptor binding	GO:0001664	5	0.433811	1.9302	1	3	1275	7383	FGRRES_09988,	0.789407
asparagine synthase (glutamine-hydrolyzing) activity	GO:0004066	6	0.433811	1.9302	1	3	1275	7383	FGRRES_09934,	0.789407
amino acid kinase activity	GO:0019202	6	0.433811	1.9302	1	3	1275	7383	FGRRES_10211,	0.789407
alcohol dehydrogenase (NAD) activity	GO:0004022	6	0.433811	1.9302	1	3	1275	7383	FGRRES_10855,	0.789407
methylisocitrate lyase activity	GO:0046421	6	0.433811	1.9302	1	3	1275	7383	FGRRES_09896,	0.789407
5-methyltetrahydropteroyltri-L-glutamate-dependent methyltransferase activity	GO:0042085	6	0.433811	1.9302	1	3	1275	7383	FGRRES_10825,	0.789407
aconitate hydratase activity	GO:0003994	6	0.433811	1.9302	1	3	1275	7383	FGRRES_10198,	0.789407
NAD+ kinase activity	GO:0003951	6	0.433811	1.9302	1	3	1275	7383	FGRRES_07150,	0.789407
N-acetyl-gamma-glutamyl-phosphate reductase activity	GO:0003942	6	0.433811	1.9302	1	3	1275	7383	FGRRES_08426,	0.789407
sodium:proton antiporter activity	GO:0015385	12	0.433811	1.9302	1	3	1275	7383	FGRRES_01606,	0.789407
DNA topoisomerase activity	GO:0003916	4	0.433811	1.9302	1	3	1275	7383	FGRRES_06874,	0.789407
D-arabinono-1,4-lactone oxidase activity	GO:0003885	6	0.433811	1.9302	1	3	1275	7383	FGRRES_08694,	0.789407
6-phosphofructo-2-kinase activity	GO:0003873	7	0.433811	1.9302	1	3	1275	7383	FGRRES_01445,	0.789407
5-methyltetrahydropteroyltriglutamate-homocysteine S-methyltransferase activity	GO:0003871	7	0.433811	1.9302	1	3	1275	7383	FGRRES_10825,	0.789407
ribonucleotide binding	GO:0032553	5	0.313346	1.03663	157	877	1275	7383	FGRRES_16266,FGRRES_09639,FGRRES_09638,FGRRES_17398,FGRRES_16299,FGRRES_00680,FGRRES_09681,FGRRES_09684,FGRRES_10725,FGRRES_02130,FGRRES_06274,FGRRES_17372,FGRRES_07842,FGRRES_03848_M,FGRRES_04580,FGRRES_11019,FGRRES_17709_M,FGRRES_02540,FGRRES_06206,FGRRES_16751,FGRRES_16693,FGRRES_01445,FGRRES_03595,FGRRES_01027,FGRRES_08830,FGRRES_06804,FGRRES_04181,FGRRES_02035,FGRRES_12595_M,FGRRES_04177,FGR…	0.790634
carbohydrate binding	GO:0030246	3	0.488263	1.03403	15	84	1275	7383	FGRRES_10392,FGRRES_16723,FGRRES_08003,FGRRES_07921,FGRRES_05851,FGRRES_10670,FGRRES_06059,FGRRES_01199,FGRRES_13834,FGRRES_13422,FGRRES_03795,FGRRES_16875,FGRRES_02658,FGRRES_00590,FGRRES_00589,	0.794036
holocytochrome-c synthase activity	GO:0004408	5	0.315584	2.89529	1	2	1275	7383	FGRRES_08386,	0.794234
adenine deaminase activity	GO:0000034	6	0.315584	2.89529	1	2	1275	7383	FGRRES_01567,	0.794234
glycerol kinase activity	GO:0004370	6	0.315584	2.89529	1	2	1275	7383	FGRRES_03247,	0.794234
glycerol-3-phosphate dehydrogenase activity	GO:0004368	6	0.315584	2.89529	1	2	1275	7383	FGRRES_04299,	0.794234
siderophore transmembrane transporter activity	GO:0015343	11	0.315584	2.89529	1	2	1275	7383	FGRRES_11029,	0.794234
protein-arginine omega-N asymmetric methyltransferase activity	GO:0035242	8	0.315584	2.89529	1	2	1275	7383	FGRRES_01134,	0.794234
guanosine-diphosphatase activity	GO:0004382	8	0.315584	2.89529	1	2	1275	7383	FGRRES_05143,	0.794234
sn-glycerol-3-phosphate:ubiquinone oxidoreductase activity	GO:0052590	7	0.315584	2.89529	1	2	1275	7383	FGRRES_04299,	0.794234
sn-glycerol-3-phosphate:ubiquinone-8 oxidoreductase activity	GO:0052591	8	0.315584	2.89529	1	2	1275	7383	FGRRES_04299,	0.794234
mannose-6-phosphate isomerase activity	GO:0004476	6	0.315584	2.89529	1	2	1275	7383	FGRRES_05330,	0.794234
isocitrate lyase activity	GO:0004451	6	0.315584	2.89529	1	2	1275	7383	FGRRES_09896,	0.794234
phosphatidylinositol-4,5-bisphosphate 5-phosphatase activity	GO:0004439	9	0.315584	2.89529	1	2	1275	7383	FGRRES_01243,	0.794234
delta14-sterol reductase activity	GO:0050613	6	0.315584	2.89529	1	2	1275	7383	FGRRES_06606,	0.794234
L-allo-threonine aldolase activity	GO:0008732	7	0.315584	2.89529	1	2	1275	7383	FGRRES_05335,	0.794234
acidic amino acid transmembrane transporter activity	GO:0015172	8	0.315584	2.89529	1	2	1275	7383	FGRRES_07131,	0.794234
L-methionine transmembrane transporter activity	GO:0015191	9	0.315584	2.89529	1	2	1275	7383	FGRRES_02145,	0.794234
methionine transmembrane transporter activity	GO:0043865	9	0.315584	2.89529	1	2	1275	7383	FGRRES_02145,	0.794234
lysine-acetylated histone binding	GO:0070577	5	0.315584	2.89529	1	2	1275	7383	FGRRES_00280_M,	0.794234
phosphoadenylyl-sulfate reductase (thioredoxin) activity	GO:0004604	6	0.315584	2.89529	1	2	1275	7383	FGRRES_08528,	0.794234
arsenite transmembrane transporter activity	GO:0015105	8	0.315584	2.89529	1	2	1275	7383	FGRRES_06579,	0.794234
Hsp70 protein binding	GO:0030544	5	0.315584	2.89529	1	2	1275	7383	FGRRES_09803,	0.794234
guanine deaminase activity	GO:0008892	6	0.315584	2.89529	1	2	1275	7383	FGRRES_05323,	0.794234
orotidine-5'-phosphate decarboxylase activity	GO:0004590	6	0.315584	2.89529	1	2	1275	7383	FGRRES_05156,	0.794234
oxoglutarate dehydrogenase (succinyl-transferring) activity	GO:0004591	6	0.315584	2.89529	1	2	1275	7383	FGRRES_04309,	0.794234
mannosyl-oligosaccharide glucosidase activity	GO:0004573	7	0.315584	2.89529	1	2	1275	7383	FGRRES_00299,	0.794234
nucleoside diphosphate kinase activity	GO:0004550	6	0.315584	2.89529	1	2	1275	7383	FGRRES_05174,	0.794234
DNA polymerase processivity factor activity	GO:0030337	4	0.315584	2.89529	1	2	1275	7383	FGRRES_01052,	0.794234
dihydroorotase activity	GO:0004151	6	0.315584	2.89529	1	2	1275	7383	FGRRES_09638,	0.794234
xylan 1,4-beta-xylosidase activity	GO:0009044	7	0.315584	2.89529	1	2	1275	7383	FGRRES_08946,	0.794234
ferrous iron transmembrane transporter activity	GO:0015093	11	0.315584	2.89529	1	2	1275	7383	FGRRES_07832,	0.794234
phosphoenolpyruvate transmembrane transporter activity	GO:0089721	8	0.315584	2.89529	1	2	1275	7383	FGRRES_04319,	0.794234
spermine transmembrane transporter activity	GO:0000297	8	0.315584	2.89529	1	2	1275	7383	FGRRES_04370,	0.794234
tRNA (guanine-N1-)-methyltransferase activity	GO:0009019	9	0.315584	2.89529	1	2	1275	7383	FGRRES_01254,	0.794234
dimethylallyltranstransferase activity	GO:0004161	6	0.315584	2.89529	1	2	1275	7383	FGRRES_17725,	0.794234
dihydroxy-acid dehydratase activity	GO:0004160	6	0.315584	2.89529	1	2	1275	7383	FGRRES_02717_M,	0.794234
dolichyl-phosphate-mannose-protein mannosyltransferase activity	GO:0004169	7	0.315584	2.89529	1	2	1275	7383	FGRRES_08935,	0.794234
radical SAM enzyme activity	GO:0070283	3	0.315584	2.89529	1	2	1275	7383	FGRRES_00278,	0.794234
3-oxoacyl-[acyl-carrier-protein] synthase activity	GO:0004315	7	0.315584	2.89529	1	2	1275	7383	FGRRES_10853,	0.794234
uridine-diphosphatase activity	GO:0045134	8	0.315584	2.89529	1	2	1275	7383	FGRRES_05143,	0.794234
proline racemase activity	GO:0018112	8	0.315584	2.89529	1	2	1275	7383	FGRRES_16921,	0.794234
triplex DNA binding	GO:0045142	6	0.315584	2.89529	1	2	1275	7383	FGRRES_06948,	0.794234
oxidized base lesion DNA N-glycosylase activity	GO:0000702	7	0.315584	2.89529	1	2	1275	7383	FGRRES_16767,	0.794234
ribonuclease inhibitor activity	GO:0008428	5	0.315584	2.89529	1	2	1275	7383	FGRRES_04997,	0.794234
osmosensor activity	GO:0005034	5	0.315584	2.89529	1	2	1275	7383	FGRRES_10042,	0.794234
phosphomannomutase activity	GO:0004615	6	0.315584	2.89529	1	2	1275	7383	FGRRES_03767,	0.794234
oxidized purine nucleobase lesion DNA N-glycosylase activity	GO:0008534	8	0.315584	2.89529	1	2	1275	7383	FGRRES_16767,	0.794234
inositol heptakisphosphate kinase activity	GO:0000829	6	0.315584	2.89529	1	2	1275	7383	FGRRES_05079,	0.794234
inositol hexakisphosphate kinase activity	GO:0000828	6	0.315584	2.89529	1	2	1275	7383	FGRRES_05079,	0.794234
phosphorylase activity	GO:0004645	6	0.315584	2.89529	1	2	1275	7383	FGRRES_08458,	0.794234
adenosine-diphosphatase activity	GO:0043262	8	0.315584	2.89529	1	2	1275	7383	FGRRES_05143,	0.794234
ubiquitin-protein transferase regulator activity	GO:0055106	4	0.315584	2.89529	1	2	1275	7383	FGRRES_00660,	0.794234
serine C-palmitoyltransferase activity	GO:0004758	8	0.315584	2.89529	1	2	1275	7383	FGRRES_04102,	0.794234
dehydrodolichyl diphosphate synthase activity	GO:0045547	6	0.315584	2.89529	1	2	1275	7383	FGRRES_00298,	0.794234
L-threonine ammonia-lyase activity	GO:0004794	6	0.315584	2.89529	1	2	1275	7383	FGRRES_00296,	0.794234
threonine aldolase activity	GO:0004793	6	0.315584	2.89529	1	2	1275	7383	FGRRES_05335,	0.794234
very long-chain fatty acid-CoA ligase activity	GO:0031957	6	0.315584	2.89529	1	2	1275	7383	FGRRES_01419,	0.794234
histone methyltransferase activity (H3-K4 specific)	GO:0042800	9	0.315584	2.89529	1	2	1275	7383	FGRRES_09564,	0.794234
RNA polymerase III activity	GO:0001056	9	0.315584	2.89529	1	2	1275	7383	FGRRES_00365,	0.794234
histone deacetylase binding	GO:0042826	5	0.315584	2.89529	1	2	1275	7383	FGRRES_16007,	0.794234
siderophore transporter activity	GO:0042927	3	0.315584	2.89529	1	2	1275	7383	FGRRES_11029,	0.794234
C-palmitoyltransferase activity	GO:0016454	7	0.315584	2.89529	1	2	1275	7383	FGRRES_04102,	0.794234
phosphatidylinositol-4,5-bisphosphate phosphatase activity	GO:0106019	9	0.315584	2.89529	1	2	1275	7383	FGRRES_01243,	0.794234
fructosyl-amino acid oxidase activity	GO:0051700	6	0.315584	2.89529	1	2	1275	7383	FGRRES_08462,	0.794234
acetylation-dependent protein binding	GO:0140033	5	0.315584	2.89529	1	2	1275	7383	FGRRES_00280_M,	0.794234
ligase activity, forming carbon-carbon bonds	GO:0016885	4	0.315584	2.89529	1	2	1275	7383	FGRRES_07075_M,	0.794234
oxidoreductase activity, acting on other nitrogenous compounds as donors, oxygen as acceptor	GO:0016663	5	0.315584	2.89529	1	2	1275	7383	FGRRES_04126,	0.794234
cyanamide hydratase activity	GO:0018820	6	0.315584	2.89529	1	2	1275	7383	FGRRES_08194,	0.794234
L-glutamate transmembrane transporter activity	GO:0005313	8	0.315584	2.89529	1	2	1275	7383	FGRRES_07131,	0.794234
carboxyl- or carbamoyltransferase activity	GO:0016743	5	0.315584	2.89529	1	2	1275	7383	FGRRES_09638,	0.794234
sterol 24-C-methyltransferase activity	GO:0003838	7	0.315584	2.89529	1	2	1275	7383	FGRRES_02783,	0.794234
dolichyl pyrophosphate Glc1Man9GlcNAc2 alpha-1,3-glucosyltransferase activity	GO:0042283	7	0.315584	2.89529	1	2	1275	7383	FGRRES_02527,	0.794234
sphingolipid delta-4 desaturase activity	GO:0042284	5	0.315584	2.89529	1	2	1275	7383	FGRRES_02522,	0.794234
ubiquitin-protein transferase activator activity	GO:0097027	5	0.315584	2.89529	1	2	1275	7383	FGRRES_00660,	0.794234
phosphatidylinositol trisphosphate phosphatase activity	GO:0034594	8	0.315584	2.89529	1	2	1275	7383	FGRRES_01243,	0.794234
nucleoside-diphosphatase activity	GO:0017110	7	0.315584	2.89529	1	2	1275	7383	FGRRES_05143,	0.794234
DNA topoisomerase II activity	GO:0061505	5	0.315584	2.89529	1	2	1275	7383	FGRRES_06874,	0.794234
fatty acid ligase activity	GO:0015645	5	0.315584	2.89529	1	2	1275	7383	FGRRES_01419,	0.794234
retinal dehydrogenase activity	GO:0001758	6	0.315584	2.89529	1	2	1275	7383	FGRRES_00979,	0.794234
trans-aconitate 2-methyltransferase activity	GO:0030798	7	0.315584	2.89529	1	2	1275	7383	FGRRES_12495,	0.794234
iron chelate transmembrane transporter activity	GO:0015603	4	0.315584	2.89529	1	2	1275	7383	FGRRES_11029,	0.794234
adenylylsulfate kinase activity	GO:0004020	6	0.315584	2.89529	1	2	1275	7383	FGRRES_01329,	0.794234
adenylosuccinate synthase activity	GO:0004019	5	0.315584	2.89529	1	2	1275	7383	FGRRES_05187_M,	0.794234
acetylglutamate kinase activity	GO:0003991	6	0.315584	2.89529	1	2	1275	7383	FGRRES_08426,	0.794234
acetolactate synthase activity	GO:0003984	5	0.315584	2.89529	1	2	1275	7383	FGRRES_01086,	0.794234
Hsp90 protein binding	GO:0051879	5	0.315584	2.89529	1	2	1275	7383	FGRRES_09803,	0.794234
G-quadruplex DNA binding	GO:0051880	6	0.315584	2.89529	1	2	1275	7383	FGRRES_01699_M,	0.794234
DNA topoisomerase type II (ATP-hydrolyzing) activity	GO:0003918	11	0.315584	2.89529	1	2	1275	7383	FGRRES_06874,	0.794234
DNA topoisomerase type I activity	GO:0003917	5	0.315584	2.89529	1	2	1275	7383	FGRRES_06874,	0.794234
cysteine dioxygenase activity	GO:0017172	6	0.315584	2.89529	1	2	1275	7383	FGRRES_13829,	0.794234
methylated-DNA-[protein]-cysteine S-methyltransferase activity	GO:0003908	7	0.315584	2.89529	1	2	1275	7383	FGRRES_17503,	0.794234
COPII adaptor activity	GO:0097020	5	0.315584	2.89529	1	2	1275	7383	FGRRES_00538,	0.794234
GMP synthase (glutamine-hydrolyzing) activity	GO:0003922	6	0.315584	2.89529	1	2	1275	7383	FGRRES_09638,	0.794234
ATP adenylyltransferase activity	GO:0003877	7	0.315584	2.89529	1	2	1275	7383	FGRRES_02259,	0.794234
glucan endo-1,6-beta-glucosidase activity	GO:0046557	8	0.315584	2.89529	1	2	1275	7383	FGRRES_08623_M,	0.794234
1-pyrroline-5-carboxylate dehydrogenase activity	GO:0003842	6	0.315584	2.89529	1	2	1275	7383	FGRRES_01141,	0.794234
4-aminobutyrate transaminase activity	GO:0003867	6	0.315584	2.89529	1	2	1275	7383	FGRRES_06751,	0.794234
monosaccharide binding	GO:0048029	4	0.539372	1.08574	3	16	1275	7383	FGRRES_10392,FGRRES_00590,FGRRES_00589,	0.797651
manganese ion binding	GO:0030145	7	0.539372	1.08574	3	16	1275	7383	FGRRES_02531,FGRRES_01699_M,FGRRES_10967,	0.797651
sulfur compound transmembrane transporter activity	GO:1901682	4	0.539372	1.08574	3	16	1275	7383	FGRRES_01006,FGRRES_01066,FGRRES_02145,	0.797651
mannosidase activity	GO:0015923	6	0.542173	1.05283	4	22	1275	7383	FGRRES_10387,FGRRES_16723,FGRRES_17249,FGRRES_04930,	0.798177
sequence-specific DNA binding	GO:0043565	6	0.543262	0.995834	27	157	1275	7383	FGRRES_16912_M,FGRRES_17323,FGRRES_06307,FGRRES_04109,FGRRES_01699_M,FGRRES_04288,FGRRES_06922,FGRRES_09019,FGRRES_05187_M,FGRRES_10179,FGRRES_12711,FGRRES_11657,FGRRES_12345,FGRRES_12344,FGRRES_09565,FGRRES_16768_M,FGRRES_09520,FGRRES_06664,FGRRES_10868,FGRRES_16816_M,FGRRES_06721,FGRRES_03281,FGRRES_16777,FGRRES_01157,FGRRES_07020,FGRRES_04888_M,FGRRES_15782,	0.798579
serine-type carboxypeptidase activity	GO:0004185	8	0.536406	1.15812	2	10	1275	7383	FGRRES_10145,FGRRES_03769,	0.80052
serine-type exopeptidase activity	GO:0070008	6	0.536406	1.15812	2	10	1275	7383	FGRRES_10145,FGRRES_03769,	0.80052
molybdenum ion binding	GO:0030151	7	0.536406	1.15812	2	10	1275	7383	FGRRES_08821,FGRRES_15910,	0.80052
calcium-transporting ATPase activity	GO:0005388	10	0.536406	1.15812	2	10	1275	7383	FGRRES_02400,FGRRES_09515,	0.80052
hydrolase activity, hydrolyzing N-glycosyl compounds	GO:0016799	5	0.536406	1.15812	2	10	1275	7383	FGRRES_16767,FGRRES_10090,	0.80052
endodeoxyribonuclease activity, producing 5'-phosphomonoesters	GO:0016888	8	0.536406	1.15812	2	10	1275	7383	FGRRES_05738,FGRRES_00799,	0.80052
phosphotransferase activity, for other substituted phosphate groups	GO:0016780	5	0.493328	1.15812	3	15	1275	7383	FGRRES_10223,FGRRES_05154,FGRRES_05591,	0.800942
oxidoreductase activity, acting on the CH-NH group of donors, NAD or NADP as acceptor	GO:0016646	5	0.493328	1.15812	3	15	1275	7383	FGRRES_00417,FGRRES_01141,FGRRES_00979,	0.800942
P-P-bond-hydrolysis-driven transmembrane transporter activity	GO:0015405	6	0.0847093	1.32356	24	105	1275	7383	FGRRES_09681,FGRRES_04580,FGRRES_08830,FGRRES_02870,FGRRES_08466,FGRRES_02400,FGRRES_03032,FGRRES_16114,FGRRES_09707,FGRRES_03882,FGRRES_02316,FGRRES_10995,FGRRES_11272,FGRRES_12704,FGRRES_06881_M,FGRRES_09515,FGRRES_16825,FGRRES_03323,FGRRES_02677,FGRRES_15855_M,FGRRES_00046,FGRRES_05527,FGRRES_02139,FGRRES_05589,	0.805149
primary active transmembrane transporter activity	GO:0015399	5	0.0847093	1.32356	24	105	1275	7383	FGRRES_09681,FGRRES_04580,FGRRES_08830,FGRRES_02870,FGRRES_08466,FGRRES_02400,FGRRES_03032,FGRRES_16114,FGRRES_09707,FGRRES_03882,FGRRES_02316,FGRRES_10995,FGRRES_11272,FGRRES_12704,FGRRES_06881_M,FGRRES_09515,FGRRES_16825,FGRRES_03323,FGRRES_02677,FGRRES_15855_M,FGRRES_00046,FGRRES_05527,FGRRES_02139,FGRRES_05589,	0.805149
UDP-glycosyltransferase activity	GO:0008194	5	0.0871912	1.76235	7	23	1275	7383	FGRRES_06822,FGRRES_07946,FGRRES_16273_M,FGRRES_10116,FGRRES_10117,FGRRES_01964,FGRRES_17491,	0.805284
oxidoreductase activity, acting on the CH-CH group of donors, NAD or NADP as acceptor	GO:0016628	5	0.0871912	1.76235	7	23	1275	7383	FGRRES_04143,FGRRES_15680_M,FGRRES_00407,FGRRES_11656,FGRRES_06606,FGRRES_17403,FGRRES_00003,	0.805284
hydrolase activity, acting on acid anhydrides, catalyzing transmembrane movement of substances	GO:0016820	5	0.0642892	1.36249	24	102	1275	7383	FGRRES_09681,FGRRES_04580,FGRRES_08830,FGRRES_02870,FGRRES_08466,FGRRES_02400,FGRRES_03032,FGRRES_16114,FGRRES_09707,FGRRES_03882,FGRRES_02316,FGRRES_10995,FGRRES_11272,FGRRES_12704,FGRRES_06881_M,FGRRES_09515,FGRRES_16825,FGRRES_03323,FGRRES_02677,FGRRES_15855_M,FGRRES_00046,FGRRES_05527,FGRRES_02139,FGRRES_05589,	0.806912
NADP binding	GO:0050661	5	0.0866368	1.51059	12	46	1275	7383	FGRRES_11492,FGRRES_02539,FGRRES_08402,FGRRES_06478,FGRRES_02482,FGRRES_09006_M,FGRRES_06539,FGRRES_13875,FGRRES_01279,FGRRES_08667,FGRRES_16897,FGRRES_01111,	0.807785
nucleoside-triphosphatase activity	GO:0017111	7	0.499399	1.00639	65	374	1275	7383	FGRRES_09681,FGRRES_02130,FGRRES_04580,FGRRES_02540,FGRRES_16751,FGRRES_08830,FGRRES_06804,FGRRES_04181,FGRRES_02025,FGRRES_02026,FGRRES_02870,FGRRES_05687,FGRRES_08466,FGRRES_08849,FGRRES_06874,FGRRES_16145,FGRRES_16146,FGRRES_15914_M,FGRRES_06149,FGRRES_17665,FGRRES_09778,FGRRES_02400,FGRRES_17216,FGRRES_03032,FGRRES_16114,FGRRES_09707,FGRRES_08343,FGRRES_02752,FGRRES_09805,FGRRES_03882,FGRRES_…	0.808119
helicase activity	GO:0004386	8	0.500818	1.02187	18	102	1275	7383	FGRRES_02130,FGRRES_02540,FGRRES_16751,FGRRES_06804,FGRRES_02026,FGRRES_05687,FGRRES_08849,FGRRES_16145,FGRRES_16146,FGRRES_17216,FGRRES_02752,FGRRES_04408,FGRRES_12711,FGRRES_04350,FGRRES_05013,FGRRES_08597,FGRRES_06721,FGRRES_13764,	0.809077
endodeoxyribonuclease activity	GO:0004520	7	0.503123	1.10297	4	21	1275	7383	FGRRES_05738,FGRRES_00799,FGRRES_10291,FGRRES_01699_M,	0.811463
copper ion binding	GO:0005507	7	0.0716189	1.59241	11	40	1275	7383	FGRRES_09681,FGRRES_13185,FGRRES_10677,FGRRES_02330,FGRRES_02328,FGRRES_17179,FGRRES_13824,FGRRES_17461,FGRRES_15855_M,FGRRES_03278,FGRRES_05159,	0.81529
sequence-specific double-stranded DNA binding	GO:1990837	7	0.558884	0.995257	11	64	1275	7383	FGRRES_04288,FGRRES_06922,FGRRES_09019,FGRRES_05187_M,FGRRES_09565,FGRRES_16768_M,FGRRES_09520,FGRRES_10868,FGRRES_16816_M,FGRRES_07020,FGRRES_04888_M,	0.820312
endonuclease activity, active with either ribo- or deoxyribonucleic acids and producing 5'-phosphomonoesters	GO:0016893	7	0.510362	1.07233	5	27	1275	7383	FGRRES_05738,FGRRES_00799,FGRRES_00348,FGRRES_09025,FGRRES_04408,	0.821783
neutral amino acid transmembrane transporter activity	GO:0015175	8	0.068168	2.89529	3	6	1275	7383	FGRRES_09297,FGRRES_11250,FGRRES_02145,	0.823907
glutathione peroxidase activity	GO:0004602	4	0.068168	2.89529	3	6	1275	7383	FGRRES_09279,FGRRES_06150,FGRRES_12821,	0.823907
magnesium ion transmembrane transporter activity	GO:0015095	9	0.068168	2.89529	3	6	1275	7383	FGRRES_09673,FGRRES_00371,FGRRES_16483,	0.823907
copper ion transmembrane transporter activity	GO:0005375	10	0.068168	2.89529	3	6	1275	7383	FGRRES_08697_M,FGRRES_00773,FGRRES_01230,	0.823907
calcium channel activity	GO:0005262	8	0.068168	2.89529	3	6	1275	7383	FGRRES_04178,FGRRES_01364,FGRRES_11939,	0.823907
receptor activity	GO:0004872	3	0.0668984	1.65445	10	35	1275	7383	FGRRES_01861,FGRRES_17256,FGRRES_10606,FGRRES_02449,FGRRES_00737,FGRRES_07623,FGRRES_00856,FGRRES_10042,FGRRES_08540,FGRRES_07493,	0.829032
molecular transducer activity	GO:0060089	2	0.0668984	1.65445	10	35	1275	7383	FGRRES_01861,FGRRES_17256,FGRRES_10606,FGRRES_02449,FGRRES_00737,FGRRES_07623,FGRRES_00856,FGRRES_10042,FGRRES_08540,FGRRES_07493,	0.829032
molecular_function	GO:0003674	0	0.566189	1.00041	1275	7380	1275	7383	FGRRES_03603,FGRRES_09222,FGRRES_03601,FGRRES_16912_M,FGRRES_13127,FGRRES_16266,FGRRES_09639,FGRRES_02807,FGRRES_09638,FGRRES_05749,FGRRES_02803,FGRRES_00299,FGRRES_07893,FGRRES_00297,FGRRES_00298,FGRRES_07896,FGRRES_07894,FGRRES_06368,FGRRES_01744,FGRRES_13137,FGRRES_00696,FGRRES_03614,FGRRES_10392,FGRRES_16276,FGRRES_16275,FGRRES_10387,FGRRES_17398,FGRRES_06758,FGRRES_06751,FGRRES_06752,FGRRES_…	0.829789
transferase activity, transferring alkyl or aryl (other than methyl) groups	GO:0016765	4	0.521158	1.03934	7	39	1275	7383	FGRRES_00298,FGRRES_03066_M,FGRRES_12821,FGRRES_04287,FGRRES_17725,FGRRES_08338,FGRRES_10933,	0.837789
oxidoreductase activity, acting on paired donors, with incorporation or reduction of molecular oxygen, NAD(P)H as one donor, and incorporation of one atom of oxygen	GO:0016709	5	0.578163	0.998377	5	29	1275	7383	FGRRES_11492,FGRRES_06478,FGRRES_06539,FGRRES_13875,FGRRES_16897,	0.846071
hydrolase activity, acting on glycosyl bonds	GO:0016798	4	0.0933411	1.18954	53	258	1275	7383	FGRRES_02807,FGRRES_00299,FGRRES_10387,FGRRES_09289,FGRRES_16723,FGRRES_16767,FGRRES_08623_M,FGRRES_03212,FGRRES_04143,FGRRES_12586,FGRRES_08003,FGRRES_07921,FGRRES_05851,FGRRES_06888,FGRRES_06119,FGRRES_17249,FGRRES_05400,FGRRES_03570_M,FGRRES_03904,FGRRES_05330,FGRRES_12488,FGRRES_08395_M,FGRRES_10670,FGRRES_02067_M,FGRRES_08253,FGRRES_03455,FGRRES_01596,FGRRES_07892_M,FGRRES_13883,FGRRES_05757…	0.84612
protein disulfide oxidoreductase activity	GO:0015035	6	0.579582	1.00706	4	23	1275	7383	FGRRES_07180_M,FGRRES_03946,FGRRES_07224,FGRRES_12179_M,	0.846881
purine ribonucleotide binding	GO:0032555	6	0.585325	0.987433	140	821	1275	7383	FGRRES_16266,FGRRES_09638,FGRRES_17398,FGRRES_16299,FGRRES_00680,FGRRES_09681,FGRRES_10725,FGRRES_02130,FGRRES_06274,FGRRES_17372,FGRRES_03848_M,FGRRES_04580,FGRRES_11019,FGRRES_17709_M,FGRRES_02540,FGRRES_06206,FGRRES_16751,FGRRES_16693,FGRRES_01445,FGRRES_03595,FGRRES_08830,FGRRES_06804,FGRRES_04181,FGRRES_02035,FGRRES_12595_M,FGRRES_04177,FGRRES_14031_M,FGRRES_02025,FGRRES_02026,FGRRES_02870,F…	0.847682
carbon-sulfur lyase activity	GO:0016846	4	0.615172	0.965098	4	24	1275	7383	FGRRES_08386,FGRRES_10776_M,FGRRES_10177,FGRRES_01177,	0.849441
carbohydrate derivative transporter activity	GO:1901505	3	0.582908	1.02187	3	17	1275	7383	FGRRES_11069,FGRRES_10531,FGRRES_02699,	0.850472
Ran GTPase binding	GO:0008536	8	0.582908	1.02187	3	17	1275	7383	FGRRES_04107,FGRRES_01854,FGRRES_02233,	0.850472
thiol-dependent ubiquitin-specific protease activity	GO:0004843	9	0.582908	1.02187	3	17	1275	7383	FGRRES_01863,FGRRES_08668,FGRRES_13502_3_M,	0.850472
endoribonuclease activity, producing 5'-phosphomonoesters	GO:0016891	8	0.582908	1.02187	3	17	1275	7383	FGRRES_00348,FGRRES_09025,FGRRES_04408,	0.850472
oxidoreductase activity, acting on single donors with incorporation of molecular oxygen, incorporation of two atoms of oxygen	GO:0016702	5	0.582908	1.02187	3	17	1275	7383	FGRRES_08358,FGRRES_06001,FGRRES_13829,	0.850472
RNA polymerase II C-terminal domain binding	GO:0099122	7	0.531628	1.44765	1	4	1275	7383	FGRRES_06948,	0.853219
protein-arginine omega-N monomethyltransferase activity	GO:0035241	8	0.531628	1.44765	1	4	1275	7383	FGRRES_01134,	0.853219
isocitrate dehydrogenase activity	GO:0004448	6	0.531628	1.44765	1	4	1275	7383	FGRRES_05733,	0.853219
sulfur amino acid transmembrane transporter activity	GO:0000099	8	0.531628	1.44765	1	4	1275	7383	FGRRES_02145,	0.853219
L-phenylalanine aminotransferase activity	GO:0070546	6	0.531628	1.44765	1	4	1275	7383	FGRRES_12518,	0.853219
nucleobase transmembrane transporter activity	GO:0015205	5	0.531628	1.44765	1	4	1275	7383	FGRRES_15879,	0.853219
phosphatidylinositol-3,5-bisphosphate 5-phosphatase activity	GO:0043813	9	0.531628	1.44765	1	4	1275	7383	FGRRES_01243,	0.853219
dolichyl-phosphate-mannose-glycolipid alpha-mannosyltransferase activity	GO:0004584	7	0.531628	1.44765	1	4	1275	7383	FGRRES_09255,	0.853219
L-phenylalanine:2-oxoglutarate aminotransferase activity	GO:0080130	7	0.531628	1.44765	1	4	1275	7383	FGRRES_12518,	0.853219
ATP-dependent peptidase activity	GO:0004176	10	0.531628	1.44765	1	4	1275	7383	FGRRES_16504,	0.853219
farnesyltranstransferase activity	GO:0004311	6	0.531628	1.44765	1	4	1275	7383	FGRRES_17725,	0.853219
vitamin transporter activity	GO:0051183	3	0.531628	1.44765	1	4	1275	7383	FGRRES_03477,	0.853219
H3 histone acetyltransferase activity	GO:0010484	11	0.531628	1.44765	1	4	1275	7383	FGRRES_00280_M,	0.853219
receptor binding	GO:0005102	4	0.531628	1.44765	1	4	1275	7383	FGRRES_09988,	0.853219
2-aminoadipate transaminase activity	GO:0047536	6	0.531628	1.44765	1	4	1275	7383	FGRRES_04256_M,	0.853219
superoxide dismutase activity	GO:0004784	3	0.531628	1.44765	1	4	1275	7383	FGRRES_04454,	0.853219
alanine-tRNA ligase activity	GO:0004813	7	0.531628	1.44765	1	4	1275	7383	FGRRES_16356,	0.853219
aspartate-tRNA ligase activity	GO:0004815	7	0.531628	1.44765	1	4	1275	7383	FGRRES_16445,	0.853219
potassium ion antiporter activity	GO:0022821	10	0.531628	1.44765	1	4	1275	7383	FGRRES_01606,	0.853219
inorganic anion exchanger activity	GO:0005452	8	0.531628	1.44765	1	4	1275	7383	FGRRES_06815_M,	0.853219
manganese ion transmembrane transporter activity	GO:0005384	10	0.531628	1.44765	1	4	1275	7383	FGRRES_07832,	0.853219
G-protein beta/gamma-subunit complex binding	GO:0031683	5	0.531628	1.44765	1	4	1275	7383	FGRRES_09988,	0.853219
C-acyltransferase activity	GO:0016408	6	0.531628	1.44765	1	4	1275	7383	FGRRES_04102,	0.853219
cyclase activity	GO:0009975	3	0.531628	1.44765	1	4	1275	7383	FGRRES_03066_M,	0.853219
phosphatidylinositol-3,5-bisphosphate phosphatase activity	GO:0106018	9	0.531628	1.44765	1	4	1275	7383	FGRRES_01243,	0.853219
racemase and epimerase activity, acting on amino acids and derivatives	GO:0016855	5	0.531628	1.44765	1	4	1275	7383	FGRRES_16921,	0.853219
oxidoreductase activity, acting on a sulfur group of donors, NAD(P) as acceptor	GO:0016668	5	0.531628	1.44765	1	4	1275	7383	FGRRES_02482,	0.853219
nucleoside transmembrane transporter activity	GO:0005337	6	0.531628	1.44765	1	4	1275	7383	FGRRES_10531,	0.853219
oxidoreductase activity, acting on superoxide radicals as acceptor	GO:0016721	4	0.531628	1.44765	1	4	1275	7383	FGRRES_04454,	0.853219
U6 snRNA binding	GO:0017070	7	0.531628	1.44765	1	4	1275	7383	FGRRES_17287_M,	0.853219
gamma-glutamylcyclotransferase activity	GO:0003839	6	0.531628	1.44765	1	4	1275	7383	FGRRES_12746,	0.853219
succinate dehydrogenase (ubiquinone) activity	GO:0008177	6	0.531628	1.44765	1	4	1275	7383	FGRRES_13137,	0.853219
alcohol dehydrogenase (NADP+) activity	GO:0008106	7	0.531628	1.44765	1	4	1275	7383	FGRRES_01686,	0.853219
oxidoreductase activity, acting on the CH-OH group of donors, quinone or similar compound as acceptor	GO:0016901	5	0.531628	1.44765	1	4	1275	7383	FGRRES_04299,	0.853219
RNA polymerase II C-terminal domain phosphoserine binding	GO:1990269	7	0.531628	1.44765	1	4	1275	7383	FGRRES_06948,	0.853219
thiol oxidase activity	GO:0016972	6	0.531628	1.44765	1	4	1275	7383	FGRRES_09833,	0.853219
arylesterase activity	GO:0004064	6	0.531628	1.44765	1	4	1275	7383	FGRRES_16175,	0.853219
L-aspartate:2-oxoglutarate aminotransferase activity	GO:0004069	6	0.531628	1.44765	1	4	1275	7383	FGRRES_12518,	0.853219
centromeric DNA binding	GO:0019237	8	0.531628	1.44765	1	4	1275	7383	FGRRES_07020,	0.853219
aldo-keto reductase (NADP) activity	GO:0004033	6	0.531628	1.44765	1	4	1275	7383	FGRRES_01686,	0.853219
potassium:proton antiporter activity	GO:0015386	12	0.531628	1.44765	1	4	1275	7383	FGRRES_01606,	0.853219
CDP-alcohol phosphatidyltransferase activity	GO:0017169	6	0.531628	1.44765	1	4	1275	7383	FGRRES_05154,	0.853219
DNA primase activity	GO:0003896	9	0.531628	1.44765	1	4	1275	7383	FGRRES_09520,	0.853219
3-deoxy-7-phosphoheptulonate synthase activity	GO:0003849	5	0.531628	1.44765	1	4	1275	7383	FGRRES_08338,	0.853219
1-alkyl-2-acetylglycerophosphocholine esterase activity	GO:0003847	6	0.531628	1.44765	1	4	1275	7383	FGRRES_05937,	0.853219
racemase activity, acting on amino acids and derivatives	GO:0036361	6	0.531628	1.44765	1	4	1275	7383	FGRRES_16921,	0.853219
phosphatidylinositol bisphosphate binding	GO:1902936	7	0.590591	1.05283	2	11	1275	7383	FGRRES_08485,FGRRES_16007,	0.854046
triglyceride lipase activity	GO:0004806	6	0.590591	1.05283	2	11	1275	7383	FGRRES_07671,FGRRES_03846,	0.854046
S-acyltransferase activity	GO:0016417	6	0.590591	1.05283	2	11	1275	7383	FGRRES_06542_M,FGRRES_08531,	0.854046
intramolecular oxidoreductase activity, interconverting aldoses and ketoses	GO:0016861	5	0.590591	1.05283	2	11	1275	7383	FGRRES_05843,FGRRES_05330,	0.854046
transferase activity, transferring acyl groups, acyl groups converted into alkyl on transfer	GO:0046912	5	0.590591	1.05283	2	11	1275	7383	FGRRES_08700,FGRRES_16692_M,	0.854046
carbon-nitrogen lyase activity	GO:0016840	4	0.590591	1.05283	2	11	1275	7383	FGRRES_00296,FGRRES_09311,	0.854046
oxidoreductase activity, acting on NAD(P)H, heme protein as acceptor	GO:0016653	5	0.590591	1.05283	2	11	1275	7383	FGRRES_01972,FGRRES_07596,	0.854046
acyl-CoA dehydrogenase activity	GO:0003995	5	0.590591	1.05283	2	11	1275	7383	FGRRES_17337,FGRRES_08510,	0.854046
ion antiporter activity	GO:0099516	6	0.590591	1.05283	2	11	1275	7383	FGRRES_01802,FGRRES_01606,	0.854046
purine ribonucleoside triphosphate binding	GO:0035639	5	0.620256	0.980722	136	803	1275	7383	FGRRES_16266,FGRRES_09638,FGRRES_17398,FGRRES_16299,FGRRES_00680,FGRRES_09681,FGRRES_10725,FGRRES_02130,FGRRES_06274,FGRRES_17372,FGRRES_03848_M,FGRRES_04580,FGRRES_02540,FGRRES_06206,FGRRES_16751,FGRRES_16693,FGRRES_01445,FGRRES_03595,FGRRES_08830,FGRRES_06804,FGRRES_04181,FGRRES_02035,FGRRES_04177,FGRRES_14031_M,FGRRES_02025,FGRRES_02026,FGRRES_02870,FGRRES_05687,FGRRES_08466,FGRRES_16145,FGRRE…	0.855254
chitinase activity	GO:0004568	6	0.623728	0.965098	3	18	1275	7383	FGRRES_03212,FGRRES_04143,FGRRES_07569,	0.858832
cis-trans isomerase activity	GO:0016859	4	0.623728	0.965098	3	18	1275	7383	FGRRES_10352,FGRRES_00884,FGRRES_16807,	0.858832
microtubule motor activity	GO:0003777	9	0.623728	0.965098	3	18	1275	7383	FGRRES_06149,FGRRES_16336,FGRRES_15772,	0.858832
peptidyl-prolyl cis-trans isomerase activity	GO:0003755	5	0.623728	0.965098	3	18	1275	7383	FGRRES_10352,FGRRES_00884,FGRRES_16807,	0.858832
oxidoreductase activity, acting on single donors with incorporation of molecular oxygen	GO:0016701	4	0.0958487	1.65445	8	28	1275	7383	FGRRES_08435,FGRRES_15680_M,FGRRES_08358,FGRRES_06001,FGRRES_16033,FGRRES_11656,FGRRES_13829,FGRRES_10065,	0.86088
phosphoric diester hydrolase activity	GO:0008081	6	0.606986	0.965098	6	36	1275	7383	FGRRES_09261,FGRRES_17324_M,FGRRES_09139_40_17163_M,FGRRES_02289,FGRRES_06730,FGRRES_07459,	0.866238
double-stranded DNA binding	GO:0003690	6	0.640294	0.944118	15	92	1275	7383	FGRRES_01699_M,FGRRES_04288,FGRRES_06922,FGRRES_09025,FGRRES_09019,FGRRES_05187_M,FGRRES_10118,FGRRES_09565,FGRRES_16768_M,FGRRES_09520,FGRRES_10868,FGRRES_16816_M,FGRRES_01157,FGRRES_07020,FGRRES_04888_M,	0.869414
beta-N-acetylhexosaminidase activity	GO:0004563	7	0.0791311	3.86039	2	3	1275	7383	FGRRES_13883,FGRRES_01283,	0.870442
Atg8 ligase activity	GO:0019776	4	0.0791311	3.86039	2	3	1275	7383	FGRRES_13550,FGRRES_10053,	0.870442
geranyltranstransferase activity	GO:0004337	6	0.0791311	3.86039	2	3	1275	7383	FGRRES_03066_M,FGRRES_17725,	0.870442
enoyl-[acyl-carrier-protein] reductase (NADH) activity	GO:0004318	7	0.0791311	3.86039	2	3	1275	7383	FGRRES_15680_M,FGRRES_11656,	0.870442
sesquiterpene synthase activity	GO:0010334	7	0.0791311	3.86039	2	3	1275	7383	FGRRES_10397,FGRRES_03537,	0.870442
trichodiene synthase activity	GO:0045482	8	0.0791311	3.86039	2	3	1275	7383	FGRRES_10397,FGRRES_03537,	0.870442
voltage-gated calcium channel activity	GO:0005245	9	0.0791311	3.86039	2	3	1275	7383	FGRRES_01364,FGRRES_11939,	0.870442
hexosaminidase activity	GO:0015929	6	0.0791311	3.86039	2	3	1275	7383	FGRRES_13883,FGRRES_01283,	0.870442
oxidoreductase activity, acting on CH or CH2 groups, disulfide as acceptor	GO:0016728	5	0.0791311	3.86039	2	3	1275	7383	FGRRES_05409,FGRRES_05174,	0.870442
spermidine transmembrane transporter activity	GO:0015606	8	0.0791311	3.86039	2	3	1275	7383	FGRRES_03111,FGRRES_04370,	0.870442
DNA photolyase activity	GO:0003913	5	0.0791311	3.86039	2	3	1275	7383	FGRRES_00797,FGRRES_16955,	0.870442
purine nucleotide binding	GO:0017076	5	0.611364	0.982645	140	825	1275	7383	FGRRES_16266,FGRRES_09638,FGRRES_17398,FGRRES_16299,FGRRES_00680,FGRRES_09681,FGRRES_10725,FGRRES_02130,FGRRES_06274,FGRRES_17372,FGRRES_03848_M,FGRRES_04580,FGRRES_11019,FGRRES_17709_M,FGRRES_02540,FGRRES_06206,FGRRES_16751,FGRRES_16693,FGRRES_01445,FGRRES_03595,FGRRES_08830,FGRRES_06804,FGRRES_04181,FGRRES_02035,FGRRES_12595_M,FGRRES_04177,FGRRES_14031_M,FGRRES_02025,FGRRES_02026,FGRRES_02870,F…	0.871216
glutathione transferase activity	GO:0004364	5	0.612557	1.15812	1	5	1275	7383	FGRRES_12821,	0.871647
calcium-dependent cysteine-type endopeptidase activity	GO:0004198	8	0.612557	1.15812	1	5	1275	7383	FGRRES_02645,	0.871647
dipeptidyl-peptidase activity	GO:0008239	8	0.612557	1.15812	1	5	1275	7383	FGRRES_01017,	0.871647
omega peptidase activity	GO:0008242	7	0.612557	1.15812	1	5	1275	7383	FGRRES_01863,	0.871647
protein phosphorylated amino acid binding	GO:0045309	5	0.612557	1.15812	1	5	1275	7383	FGRRES_06948,	0.871647
phosphofructokinase activity	GO:0008443	6	0.612557	1.15812	1	5	1275	7383	FGRRES_01445,	0.871647
phosphatidylserine decarboxylase activity	GO:0004609	6	0.612557	1.15812	1	5	1275	7383	FGRRES_02001,	0.871647
phosphoserine residue binding	GO:0050815	6	0.612557	1.15812	1	5	1275	7383	FGRRES_06948,	0.871647
CoA hydrolase activity	GO:0016289	6	0.612557	1.15812	1	5	1275	7383	FGRRES_02848,	0.871647
steroid dehydrogenase activity	GO:0016229	4	0.612557	1.15812	1	5	1275	7383	FGRRES_01618,	0.871647
intramolecular transferase activity, phosphotransferases	GO:0016868	5	0.612557	1.15812	1	5	1275	7383	FGRRES_03767,	0.871647
oxidoreductase activity, acting on a sulfur group of donors, oxygen as acceptor	GO:0016670	5	0.612557	1.15812	1	5	1275	7383	FGRRES_09833,	0.871647
transferase activity, transferring amino-acyl groups	GO:0016755	5	0.612557	1.15812	1	5	1275	7383	FGRRES_12746,	0.871647
flap endonuclease activity	GO:0048256	8	0.612557	1.15812	1	5	1275	7383	FGRRES_00799,	0.871647
phosphatidylinositol bisphosphate phosphatase activity	GO:0034593	8	0.612557	1.15812	1	5	1275	7383	FGRRES_01243,	0.871647
phosphatidylinositol phosphate 5-phosphatase activity	GO:0034595	8	0.612557	1.15812	1	5	1275	7383	FGRRES_01243,	0.871647
5'-flap endonuclease activity	GO:0017108	9	0.612557	1.15812	1	5	1275	7383	FGRRES_00799,	0.871647
double-stranded RNA binding	GO:0003725	6	0.612557	1.15812	1	5	1275	7383	FGRRES_09025,	0.871647
phospholipid-translocating ATPase activity	GO:0004012	6	0.612557	1.15812	1	5	1275	7383	FGRRES_08595,	0.871647
misfolded protein binding	GO:0051787	4	0.612557	1.15812	1	5	1275	7383	FGRRES_00271,	0.871647
solute:sodium symporter activity	GO:0015370	10	0.612557	1.15812	1	5	1275	7383	FGRRES_10531,	0.871647
racemase and epimerase activity	GO:0016854	4	0.105988	2.10567	4	11	1275	7383	FGRRES_16921,FGRRES_09439_M,FGRRES_00590,FGRRES_00589,	0.871955
L-amino acid transmembrane transporter activity	GO:0015179	8	0.0776973	2.31624	4	10	1275	7383	FGRRES_09297,FGRRES_11250,FGRRES_07131,FGRRES_02145,	0.874317
hydrolase activity, acting on carbon-nitrogen (but not peptide) bonds, in linear amidines	GO:0016813	5	0.0776973	2.31624	4	10	1275	7383	FGRRES_02893,FGRRES_10967,FGRRES_05446,FGRRES_13483,	0.874317
solute:cation antiporter activity	GO:0015298	7	0.639903	0.965098	2	12	1275	7383	FGRRES_01802,FGRRES_01606,	0.874951
solute:proton antiporter activity	GO:0015299	10	0.639903	0.965098	2	12	1275	7383	FGRRES_01802,FGRRES_01606,	0.874951
rRNA methyltransferase activity	GO:0008649	7	0.639903	0.965098	2	12	1275	7383	FGRRES_01870,FGRRES_10175,	0.874951
snRNA binding	GO:0017069	6	0.639903	0.965098	2	12	1275	7383	FGRRES_17287_M,FGRRES_04286,	0.874951
ubiquitin protein ligase activity	GO:0061630	6	0.639903	0.965098	2	12	1275	7383	FGRRES_10272,FGRRES_06922,	0.874951
endopeptidase activity	GO:0004175	6	0.639762	0.951311	23	140	1275	7383	FGRRES_17681_M,FGRRES_10343,FGRRES_16733,FGRRES_02584,FGRRES_13084,FGRRES_05815,FGRRES_03975,FGRRES_15901,FGRRES_04758,FGRRES_15729_M,FGRRES_02976,FGRRES_06572,FGRRES_04840,FGRRES_13826,FGRRES_05472,FGRRES_05471,FGRRES_02645,FGRRES_09558,FGRRES_07775,FGRRES_10432_M,FGRRES_17472,FGRRES_16958_M,FGRRES_00003,	0.875982
disulfide oxidoreductase activity	GO:0015036	5	0.648822	0.926494	4	25	1275	7383	FGRRES_07180_M,FGRRES_03946,FGRRES_07224,FGRRES_12179_M,	0.878557
4 iron, 4 sulfur cluster binding	GO:0051539	5	0.648822	0.926494	4	25	1275	7383	FGRRES_00278,FGRRES_02482,FGRRES_10198,FGRRES_09589,	0.878557
pyrophosphatase activity	GO:0016462	6	0.648356	0.965098	65	390	1275	7383	FGRRES_09681,FGRRES_02130,FGRRES_04580,FGRRES_02540,FGRRES_16751,FGRRES_08830,FGRRES_06804,FGRRES_04181,FGRRES_02025,FGRRES_02026,FGRRES_02870,FGRRES_05687,FGRRES_08466,FGRRES_08849,FGRRES_06874,FGRRES_16145,FGRRES_16146,FGRRES_15914_M,FGRRES_06149,FGRRES_17665,FGRRES_09778,FGRRES_02400,FGRRES_17216,FGRRES_03032,FGRRES_16114,FGRRES_09707,FGRRES_08343,FGRRES_02752,FGRRES_09805,FGRRES_03882,FGRRES_…	0.879141
GTPase regulator activity	GO:0030695	5	0.680455	0.89086	4	26	1275	7383	FGRRES_04107,FGRRES_09952,FGRRES_01065,FGRRES_09982,	0.884682
translation elongation factor activity	GO:0003746	7	0.680455	0.89086	4	26	1275	7383	FGRRES_04181,FGRRES_08737,FGRRES_17102,FGRRES_08532,	0.884682
hydrolase activity, acting on acid anhydrides, in phosphorus-containing anhydrides	GO:0016818	5	0.657049	0.96263	65	391	1275	7383	FGRRES_09681,FGRRES_02130,FGRRES_04580,FGRRES_02540,FGRRES_16751,FGRRES_08830,FGRRES_06804,FGRRES_04181,FGRRES_02025,FGRRES_02026,FGRRES_02870,FGRRES_05687,FGRRES_08466,FGRRES_08849,FGRRES_06874,FGRRES_16145,FGRRES_16146,FGRRES_15914_M,FGRRES_06149,FGRRES_17665,FGRRES_09778,FGRRES_02400,FGRRES_17216,FGRRES_03032,FGRRES_16114,FGRRES_09707,FGRRES_08343,FGRRES_02752,FGRRES_09805,FGRRES_03882,FGRRES_…	0.887242
mannosyl-oligosaccharide 1,2-alpha-mannosidase activity	GO:0004571	9	0.684407	0.89086	2	13	1275	7383	FGRRES_16723,FGRRES_04930,	0.887463
mannosyl-oligosaccharide mannosidase activity	GO:0015924	8	0.684407	0.89086	2	13	1275	7383	FGRRES_16723,FGRRES_04930,	0.887463
ubiquitin-like protein ligase activity	GO:0061659	5	0.684407	0.89086	2	13	1275	7383	FGRRES_10272,FGRRES_06922,	0.887463
iron-sulfur cluster binding	GO:0051536	4	0.691596	0.89854	9	58	1275	7383	FGRRES_00278,FGRRES_08821,FGRRES_08402,FGRRES_02433,FGRRES_02482,FGRRES_00475,FGRRES_10198,FGRRES_16376,FGRRES_09589,	0.892059
metal cluster binding	GO:0051540	3	0.691596	0.89854	9	58	1275	7383	FGRRES_00278,FGRRES_08821,FGRRES_08402,FGRRES_02433,FGRRES_02482,FGRRES_00475,FGRRES_10198,FGRRES_16376,FGRRES_09589,	0.892059
transferase activity, transferring one-carbon groups	GO:0016741	4	0.690698	0.939701	37	228	1275	7383	FGRRES_09638,FGRRES_01744,FGRRES_16204,FGRRES_11074,FGRRES_04199,FGRRES_04160,FGRRES_09351,FGRRES_01870,FGRRES_05835,FGRRES_03951,FGRRES_02420,FGRRES_02419,FGRRES_03567,FGRRES_15669_M,FGRRES_03011,FGRRES_16549,FGRRES_12495,FGRRES_03752_M,FGRRES_09312,FGRRES_08741,FGRRES_17503,FGRRES_16917,FGRRES_17571,FGRRES_10175,FGRRES_02783,FGRRES_03835,FGRRES_12342,FGRRES_01254,FGRRES_05413,FGRRES_05468,FGRRE…	0.892075
serine-type endopeptidase activity	GO:0004252	7	0.696881	0.89086	8	52	1275	7383	FGRRES_10343,FGRRES_13084,FGRRES_05815,FGRRES_02976,FGRRES_06572,FGRRES_13826,FGRRES_10432_M,FGRRES_00003,	0.894164
serine hydrolase activity	GO:0017171	4	0.695799	0.90696	13	83	1275	7383	FGRRES_10343,FGRRES_13084,FGRRES_07358,FGRRES_05815,FGRRES_05829,FGRRES_02976,FGRRES_10145,FGRRES_06572,FGRRES_03455,FGRRES_13826,FGRRES_03769,FGRRES_10432_M,FGRRES_00003,	0.895122
GTPase activator activity	GO:0005096	5	0.696846	0.868588	3	20	1275	7383	FGRRES_04107,FGRRES_01065,FGRRES_09982,	0.895292
phosphoric ester hydrolase activity	GO:0042578	5	0.69938	0.916843	19	120	1275	7383	FGRRES_09261,FGRRES_06297,FGRRES_17324_M,FGRRES_12043,FGRRES_13619,FGRRES_09139_40_17163_M,FGRRES_06977,FGRRES_03402,FGRRES_00406,FGRRES_01243,FGRRES_02289,FGRRES_05079,FGRRES_05987,FGRRES_11979,FGRRES_04504,FGRRES_06730,FGRRES_04986,FGRRES_08922,FGRRES_07459,	0.896195
sulfur compound binding	GO:1901681	3	0.101235	1.9302	5	15	1275	7383	FGRRES_04309,FGRRES_13946,FGRRES_07075_M,FGRRES_01086,FGRRES_10446,	0.900993
methyltransferase activity	GO:0008168	5	0.668691	0.947551	36	220	1275	7383	FGRRES_01744,FGRRES_16204,FGRRES_11074,FGRRES_04199,FGRRES_04160,FGRRES_09351,FGRRES_01870,FGRRES_05835,FGRRES_03951,FGRRES_02420,FGRRES_02419,FGRRES_03567,FGRRES_15669_M,FGRRES_03011,FGRRES_16549,FGRRES_12495,FGRRES_03752_M,FGRRES_09312,FGRRES_08741,FGRRES_17503,FGRRES_16917,FGRRES_17571,FGRRES_10175,FGRRES_02783,FGRRES_03835,FGRRES_12342,FGRRES_01254,FGRRES_05413,FGRRES_05468,FGRRES_09564,FGRRE…	0.901719
magnesium ion binding	GO:0000287	6	0.706606	0.89086	10	65	1275	7383	FGRRES_05733,FGRRES_09344,FGRRES_01346,FGRRES_13946,FGRRES_05187_M,FGRRES_15842,FGRRES_01086,FGRRES_08595,FGRRES_10446,FGRRES_15742,	0.904272
transferase activity	GO:0016740	3	0.675516	0.977686	233	1380	1275	7383	FGRRES_03603,FGRRES_09638,FGRRES_07893,FGRRES_00298,FGRRES_07896,FGRRES_06368,FGRRES_01744,FGRRES_17398,FGRRES_06751,FGRRES_00278,FGRRES_16299,FGRRES_02527,FGRRES_10725,FGRRES_09255,FGRRES_04256_M,FGRRES_00237,FGRRES_01766,FGRRES_09279,FGRRES_03392_M,FGRRES_03149,FGRRES_04560,FGRRES_04570,FGRRES_03672,FGRRES_16204,FGRRES_11413,FGRRES_11467,FGRRES_06206,FGRRES_13873_M,FGRRES_11074,FGRRES_16741,FGR…	0.907175
hydrolase activity	GO:0016787	3	0.676551	0.979783	278	1643	1275	7383	FGRRES_03601,FGRRES_02807,FGRRES_09638,FGRRES_00299,FGRRES_10387,FGRRES_05739,FGRRES_05738,FGRRES_09261,FGRRES_17681_M,FGRRES_09681,FGRRES_06297,FGRRES_00271,FGRRES_02130,FGRRES_09670,FGRRES_08908,FGRRES_10343,FGRRES_09289,FGRRES_01765,FGRRES_07837,FGRRES_11648_M,FGRRES_16724,FGRRES_16723,FGRRES_17324_M,FGRRES_04580,FGRRES_02531,FGRRES_11411,FGRRES_02540,FGRRES_03650,FGRRES_12043,FGRRES_03108,FGR…	0.907319
amide binding	GO:0033218	3	0.674986	0.908328	8	51	1275	7383	FGRRES_10352,FGRRES_01854,FGRRES_15673_M,FGRRES_07075_M,FGRRES_03747,FGRRES_02233,FGRRES_03257,FGRRES_10464,	0.907708
hydrolase activity, acting on acid anhydrides	GO:0016817	4	0.674139	0.957731	65	393	1275	7383	FGRRES_09681,FGRRES_02130,FGRRES_04580,FGRRES_02540,FGRRES_16751,FGRRES_08830,FGRRES_06804,FGRRES_04181,FGRRES_02025,FGRRES_02026,FGRRES_02870,FGRRES_05687,FGRRES_08466,FGRRES_08849,FGRRES_06874,FGRRES_16145,FGRRES_16146,FGRRES_15914_M,FGRRES_06149,FGRRES_17665,FGRRES_09778,FGRRES_02400,FGRRES_17216,FGRRES_03032,FGRRES_16114,FGRRES_09707,FGRRES_08343,FGRRES_02752,FGRRES_09805,FGRRES_03882,FGRRES_…	0.907815
serine-type peptidase activity	GO:0008236	5	0.678364	0.91802	13	82	1275	7383	FGRRES_10343,FGRRES_13084,FGRRES_07358,FGRRES_05815,FGRRES_05829,FGRRES_02976,FGRRES_10145,FGRRES_06572,FGRRES_03455,FGRRES_13826,FGRRES_03769,FGRRES_10432_M,FGRRES_00003,	0.908507
single-stranded DNA endodeoxyribonuclease activity	GO:0000014	8	0.679511	0.965098	1	6	1275	7383	FGRRES_10291,	0.9088
purine nucleotide transmembrane transporter activity	GO:0015216	6	0.679511	0.965098	1	6	1275	7383	FGRRES_00646,	0.9088
phosphatidylinositol-3,5-bisphosphate binding	GO:0080025	8	0.679511	0.965098	1	6	1275	7383	FGRRES_16007,	0.9088
phosphatidylinositol-5-phosphate binding	GO:0010314	7	0.679511	0.965098	1	6	1275	7383	FGRRES_04308,	0.9088
polygalacturonase activity	GO:0004650	6	0.679511	0.965098	1	6	1275	7383	FGRRES_07551,	0.9088
arginine N-methyltransferase activity	GO:0016273	7	0.679511	0.965098	1	6	1275	7383	FGRRES_01134,	0.9088
protein-arginine N-methyltransferase activity	GO:0016274	7	0.679511	0.965098	1	6	1275	7383	FGRRES_01134,	0.9088
monovalent cation:proton antiporter activity	GO:0005451	11	0.679511	0.965098	1	6	1275	7383	FGRRES_01606,	0.9088
oxidoreductase activity, acting on the CH-CH group of donors, quinone or related compound as acceptor	GO:0016635	5	0.679511	0.965098	1	6	1275	7383	FGRRES_13137,	0.9088
zinc ion transmembrane transporter activity	GO:0005385	10	0.679511	0.965098	1	6	1275	7383	FGRRES_06685_M,	0.9088
tRNA (guanine) methyltransferase activity	GO:0016423	8	0.679511	0.965098	1	6	1275	7383	FGRRES_01254,	0.9088
phosphatidylinositol-4,5-bisphosphate binding	GO:0005546	8	0.679511	0.965098	1	6	1275	7383	FGRRES_08485,	0.9088
hydrolase activity, acting on acid carbon-carbon bonds	GO:0016822	4	0.679511	0.965098	1	6	1275	7383	FGRRES_02851,	0.9088
hydrolase activity, acting on acid carbon-carbon bonds, in ketonic substances	GO:0016823	5	0.679511	0.965098	1	6	1275	7383	FGRRES_02851,	0.9088
hydrolase activity, acting on carbon-nitrogen (but not peptide) bonds, in cyclic amides	GO:0016812	5	0.679511	0.965098	1	6	1275	7383	FGRRES_09638,	0.9088
intramolecular oxidoreductase activity, transposing S-S bonds	GO:0016864	5	0.679511	0.965098	1	6	1275	7383	FGRRES_07180_M,	0.9088
nucleotide-sugar transmembrane transporter activity	GO:0005338	6	0.679511	0.965098	1	6	1275	7383	FGRRES_02699,	0.9088
transferase activity, transferring aldehyde or ketonic groups	GO:0016744	4	0.679511	0.965098	1	6	1275	7383	FGRRES_01086,	0.9088
protein disulfide isomerase activity	GO:0003756	6	0.679511	0.965098	1	6	1275	7383	FGRRES_07180_M,	0.9088
adenylate kinase activity	GO:0004017	6	0.679511	0.965098	1	6	1275	7383	FGRRES_01699_M,	0.9088
3-dehydroquinate dehydratase activity	GO:0003855	6	0.679511	0.965098	1	6	1275	7383	FGRRES_04287,	0.9088
phosphatase activity	GO:0016791	6	0.712658	0.896162	13	84	1275	7383	FGRRES_06297,FGRRES_12043,FGRRES_13619,FGRRES_06977,FGRRES_03402,FGRRES_00406,FGRRES_01243,FGRRES_05079,FGRRES_05987,FGRRES_11979,FGRRES_04504,FGRRES_04986,FGRRES_08922,	0.910825
beta-galactosidase activity	GO:0004565	7	0.10434	2.48168	3	7	1275	7383	FGRRES_03904,FGRRES_16875,FGRRES_03343,	0.912045
fatty acid synthase activity	GO:0004312	6	0.10434	2.48168	3	7	1275	7383	FGRRES_15680_M,FGRRES_11656,FGRRES_10853,	0.912045
shikimate 3-dehydrogenase (NADP+) activity	GO:0004764	6	0.10434	2.48168	3	7	1275	7383	FGRRES_05704,FGRRES_04287,FGRRES_12357,	0.912045
transcriptional repressor activity, RNA polymerase II core promoter proximal region sequence-specific binding	GO:0001078	6	0.10434	2.48168	3	7	1275	7383	FGRRES_12970_M,FGRRES_09565,FGRRES_16768_M,	0.912045
transcriptional repressor activity, RNA polymerase II transcription regulatory region sequence-specific binding	GO:0001227	5	0.10434	2.48168	3	7	1275	7383	FGRRES_12970_M,FGRRES_09565,FGRRES_16768_M,	0.912045
L-ascorbic acid binding	GO:0031418	5	0.10434	2.48168	3	7	1275	7383	FGRRES_10392,FGRRES_00590,FGRRES_00589,	0.912045
oxidoreductase activity, acting on the CH-OH group of donors, oxygen as acceptor	GO:0016899	5	0.10434	2.48168	3	7	1275	7383	FGRRES_11032,FGRRES_03569,FGRRES_08694,	0.912045
secondary active transmembrane transporter activity	GO:0015291	5	0.103447	1.40095	15	62	1275	7383	FGRRES_07894,FGRRES_01006,FGRRES_05659,FGRRES_03080,FGRRES_04204,FGRRES_01802,FGRRES_10531,FGRRES_06579,FGRRES_01230,FGRRES_07131,FGRRES_07587,FGRRES_01606,FGRRES_01066,FGRRES_06815_M,FGRRES_02145,	0.91238
deoxyribonuclease activity	GO:0004536	6	0.737565	0.827227	4	28	1275	7383	FGRRES_05738,FGRRES_00799,FGRRES_10291,FGRRES_01699_M,	0.922192
phosphopantetheine binding	GO:0031177	5	0.737565	0.827227	4	28	1275	7383	FGRRES_15673_M,FGRRES_03747,FGRRES_03257,FGRRES_10464,	0.922192
oxidoreductase activity, acting on NAD(P)H	GO:0016651	4	0.722778	0.851557	5	34	1275	7383	FGRRES_05749,FGRRES_02482,FGRRES_09006_M,FGRRES_01972,FGRRES_07596,	0.922555
ligase activity, forming carbon-nitrogen bonds	GO:0016879	4	0.737531	0.872554	11	73	1275	7383	FGRRES_09638,FGRRES_08078,FGRRES_09337,FGRRES_03938,FGRRES_09139_40_17163_M,FGRRES_05187_M,FGRRES_07075_M,FGRRES_09934,FGRRES_02228,FGRRES_09554,FGRRES_08688_M,	0.923329
RNA polymerase II regulatory region sequence-specific DNA binding	GO:0000977	9	0.113306	1.5974	8	29	1275	7383	FGRRES_04288,FGRRES_09019,FGRRES_09565,FGRRES_16768_M,FGRRES_10868,FGRRES_16816_M,FGRRES_07020,FGRRES_04888_M,	0.92439
N-acetyltransferase activity	GO:0008080	7	0.744591	0.875321	13	86	1275	7383	FGRRES_07893,FGRRES_03149,FGRRES_13873_M,FGRRES_06307,FGRRES_00377,FGRRES_09723,FGRRES_09139_40_17163_M,FGRRES_13979,FGRRES_07600,FGRRES_01980,FGRRES_00117,FGRRES_07592,FGRRES_00280_M,	0.928605
substrate-specific channel activity	GO:0022838	6	0.729133	0.827227	3	21	1275	7383	FGRRES_04178,FGRRES_01364,FGRRES_11939,	0.929455
ion channel activity	GO:0005216	6	0.729133	0.827227	3	21	1275	7383	FGRRES_04178,FGRRES_01364,FGRRES_11939,	0.929455
peptidase activity, acting on L-amino acid peptides	GO:0070011	5	0.747532	0.923137	44	276	1275	7383	FGRRES_17681_M,FGRRES_10343,FGRRES_02531,FGRRES_11411,FGRRES_16733,FGRRES_02584,FGRRES_08003,FGRRES_13084,FGRRES_01017,FGRRES_07358,FGRRES_01863,FGRRES_05815,FGRRES_05829,FGRRES_03562,FGRRES_03975,FGRRES_03481,FGRRES_15901,FGRRES_04758,FGRRES_15729_M,FGRRES_02976,FGRRES_10145,FGRRES_06572,FGRRES_03455,FGRRES_06527,FGRRES_16504,FGRRES_04840,FGRRES_08668,FGRRES_13502_3_M,FGRRES_13826,FGRRES_05026,F…	0.931086
aminoacyl-tRNA editing activity	GO:0002161	6	0.734903	0.827227	1	7	1275	7383	FGRRES_16356,	0.934376
histone-lysine N-methyltransferase activity	GO:0018024	8	0.734903	0.827227	1	7	1275	7383	FGRRES_09564,	0.934376
phosphatidylinositol phosphate phosphatase activity	GO:0052866	7	0.734903	0.827227	1	7	1275	7383	FGRRES_01243,	0.934376
pseudouridine synthase activity	GO:0009982	5	0.734903	0.827227	1	7	1275	7383	FGRRES_07326,	0.934376
oxidoreductase activity, acting on a sulfur group of donors, disulfide as acceptor	GO:0016671	5	0.734903	0.827227	1	7	1275	7383	FGRRES_08528,	0.934376
oxidoreductase activity, acting on paired donors, with incorporation or reduction of molecular oxygen, NAD(P)H as one donor, and incorporation of two atoms of oxygen into one donor	GO:0016708	5	0.734903	0.827227	1	7	1275	7383	FGRRES_00765,	0.934376
heat shock protein binding	GO:0031072	4	0.734903	0.827227	1	7	1275	7383	FGRRES_09803,	0.934376
protein tyrosine/serine/threonine phosphatase activity	GO:0008138	8	0.734903	0.827227	1	7	1275	7383	FGRRES_06977,	0.934376
poly(A) binding	GO:0008143	8	0.734903	0.827227	1	7	1275	7383	FGRRES_00590,	0.934376
poly-purine tract binding	GO:0070717	7	0.734903	0.827227	1	7	1275	7383	FGRRES_00590,	0.934376
RNA-directed 5'-3' RNA polymerase activity	GO:0003968	8	0.734903	0.827227	1	7	1275	7383	FGRRES_04619,	0.934376
UDP-glucose 6-dehydrogenase activity	GO:0003979	6	0.734903	0.827227	1	7	1275	7383	FGRRES_17403,	0.934376
quinone binding	GO:0048038	4	0.759826	0.772078	2	15	1275	7383	FGRRES_10677,FGRRES_03278,	0.940416
hydrolase activity, acting on carbon-nitrogen (but not peptide) bonds, in cyclic amidines	GO:0016814	5	0.759826	0.772078	2	15	1275	7383	FGRRES_05323,FGRRES_01567,	0.940416
intramolecular transferase activity	GO:0016866	4	0.759826	0.772078	2	15	1275	7383	FGRRES_07326,FGRRES_03767,	0.940416
single-stranded RNA binding	GO:0003727	6	0.759826	0.772078	2	15	1275	7383	FGRRES_00348,FGRRES_00590,	0.940416
ubiquitinyl hydrolase activity	GO:0101005	4	0.758653	0.789626	3	22	1275	7383	FGRRES_01863,FGRRES_08668,FGRRES_13502_3_M,	0.943738
O-methyltransferase activity	GO:0008171	6	0.758653	0.789626	3	22	1275	7383	FGRRES_15669_M,FGRRES_16549,FGRRES_13708,	0.943738
peptide binding	GO:0042277	4	0.758653	0.789626	3	22	1275	7383	FGRRES_10352,FGRRES_01854,FGRRES_02233,	0.943738
thiol-dependent ubiquitinyl hydrolase activity	GO:0036459	8	0.758653	0.789626	3	22	1275	7383	FGRRES_01863,FGRRES_08668,FGRRES_13502_3_M,	0.943738
N-acyltransferase activity	GO:0016410	6	0.774095	0.855428	13	88	1275	7383	FGRRES_07893,FGRRES_03149,FGRRES_13873_M,FGRRES_06307,FGRRES_00377,FGRRES_09723,FGRRES_09139_40_17163_M,FGRRES_13979,FGRRES_07600,FGRRES_01980,FGRRES_00117,FGRRES_07592,FGRRES_00280_M,	0.953256
transition metal ion binding	GO:0046914	6	0.784028	0.955923	191	1157	1275	7383	FGRRES_00297,FGRRES_10392,FGRRES_09622,FGRRES_13110,FGRRES_09261,FGRRES_02117,FGRRES_02119,FGRRES_09681,FGRRES_02522,FGRRES_17372,FGRRES_02111,FGRRES_17377,FGRRES_00249,FGRRES_00217,FGRRES_16723,FGRRES_02531,FGRRES_03683,FGRRES_16703,FGRRES_12935,FGRRES_03650,FGRRES_16223,FGRRES_15866_M,FGRRES_15730_M,FGRRES_11440,FGRRES_16245,FGRRES_11454,FGRRES_16256,FGRRES_11891,FGRRES_04109,FGRRES_03219,FGRRE…	0.954681
RNA polymerase II transcription cofactor activity	GO:0001104	5	0.785514	0.755294	3	23	1275	7383	FGRRES_10148,FGRRES_06573,FGRRES_01279,	0.955302
deaminase activity	GO:0019239	3	0.785514	0.755294	3	23	1275	7383	FGRRES_11457,FGRRES_05323,FGRRES_01567,	0.955302
DNA-dependent ATPase activity	GO:0008094	10	0.776754	0.807989	6	43	1275	7383	FGRRES_02540,FGRRES_06874,FGRRES_02752,FGRRES_12711,FGRRES_06721,FGRRES_01157,	0.95533
cutinase activity	GO:0050525	6	0.780727	0.723824	1	8	1275	7383	FGRRES_02890,	0.959011
Rho guanyl-nucleotide exchange factor activity	GO:0005089	5	0.780727	0.723824	1	8	1275	7383	FGRRES_01267,	0.959011
RNA polymerase II activating transcription factor binding	GO:0001102	6	0.780727	0.723824	1	8	1275	7383	FGRRES_07557,	0.959011
sulfurtransferase activity	GO:0016783	5	0.780727	0.723824	1	8	1275	7383	FGRRES_00278,	0.959011
endoribonuclease activity, producing 3'-phosphomonoesters	GO:0016892	8	0.780727	0.723824	1	8	1275	7383	FGRRES_03379,	0.959011
protein tag	GO:0031386	2	0.780727	0.723824	1	8	1275	7383	FGRRES_13550,	0.959011
C-methyltransferase activity	GO:0008169	6	0.780727	0.723824	1	8	1275	7383	FGRRES_02783,	0.959011
cation-transporting ATPase activity	GO:0019829	7	0.795764	0.789626	6	44	1275	7383	FGRRES_09681,FGRRES_08466,FGRRES_02400,FGRRES_09515,FGRRES_02677,FGRRES_15855_M,	0.965369
ubiquitin-like protein-specific protease activity	GO:0019783	7	0.809849	0.723824	3	24	1275	7383	FGRRES_01863,FGRRES_08668,FGRRES_13502_3_M,	0.978817
modified amino acid binding	GO:0072341	3	0.808226	0.747173	4	31	1275	7383	FGRRES_15673_M,FGRRES_03747,FGRRES_03257,FGRRES_10464,	0.979274
N-methyltransferase activity	GO:0008170	6	0.808226	0.747173	4	31	1275	7383	FGRRES_01870,FGRRES_10175,FGRRES_09564,FGRRES_01134,	0.979274
peptidase activity	GO:0008233	4	0.817185	0.896859	46	297	1275	7383	FGRRES_17681_M,FGRRES_10343,FGRRES_11648_M,FGRRES_02531,FGRRES_11411,FGRRES_16733,FGRRES_02584,FGRRES_08003,FGRRES_13084,FGRRES_01017,FGRRES_07358,FGRRES_01863,FGRRES_05815,FGRRES_05829,FGRRES_03562,FGRRES_03975,FGRRES_03481,FGRRES_15901,FGRRES_04758,FGRRES_15729_M,FGRRES_02976,FGRRES_10145,FGRRES_06572,FGRRES_03455,FGRRES_06527,FGRRES_16504,FGRRES_04840,FGRRES_08668,FGRRES_13502_3_M,FGRRES_13826…	0.986466
methylated histone binding	GO:0035064	5	0.818635	0.643399	1	9	1275	7383	FGRRES_00297,	0.987
activating transcription factor binding	GO:0033613	5	0.818635	0.643399	1	9	1275	7383	FGRRES_07557,	0.987
signal transducer activity, downstream of receptor	GO:0005057	3	0.818635	0.643399	1	9	1275	7383	FGRRES_16633,	0.987
signal transducer, downstream of receptor, with serine/threonine kinase activity	GO:0004702	8	0.818635	0.643399	1	9	1275	7383	FGRRES_16633,	0.987
phospholipid transporter activity	GO:0005548	5	0.818635	0.643399	1	9	1275	7383	FGRRES_08595,	0.987
transcriptional repressor activity, RNA polymerase II transcription factor binding	GO:0001191	5	0.818635	0.643399	1	9	1275	7383	FGRRES_16007,	0.987
methylation-dependent protein binding	GO:0140034	5	0.818635	0.643399	1	9	1275	7383	FGRRES_00297,	0.987
oxo-acid-lyase activity	GO:0016833	5	0.818635	0.643399	1	9	1275	7383	FGRRES_09896,	0.987
nucleotide kinase activity	GO:0019201	7	0.818635	0.643399	1	9	1275	7383	FGRRES_01699_M,	0.987
transcription factor activity, RNA polymerase II transcription factor binding	GO:0001076	4	0.828022	0.742383	5	39	1275	7383	FGRRES_06948,FGRRES_16007,FGRRES_10148,FGRRES_06573,FGRRES_01279,	0.987374
ATPase coupled ion transmembrane transporter activity	GO:0042625	7	0.830007	0.755294	6	46	1275	7383	FGRRES_09681,FGRRES_08466,FGRRES_02400,FGRRES_09515,FGRRES_02677,FGRRES_15855_M,	0.988536
phospholipid binding	GO:0005543	4	0.836846	0.772078	8	60	1275	7383	FGRRES_13137,FGRRES_08485,FGRRES_08739_M,FGRRES_10272,FGRRES_04308,FGRRES_16007,FGRRES_10111,FGRRES_10187,	0.989459
enzyme inhibitor activity	GO:0004857	4	0.831807	0.694871	3	25	1275	7383	FGRRES_10967,FGRRES_07557,FGRRES_04997,	0.989476
small GTPase binding	GO:0031267	6	0.831807	0.694871	3	25	1275	7383	FGRRES_04107,FGRRES_01854,FGRRES_02233,	0.989476
DNA replication origin binding	GO:0003688	8	0.831807	0.694871	3	25	1275	7383	FGRRES_06922,FGRRES_05187_M,FGRRES_09520,	0.989476
Ras GTPase binding	GO:0017016	7	0.831807	0.694871	3	25	1275	7383	FGRRES_04107,FGRRES_01854,FGRRES_02233,	0.989476
ATP-dependent DNA helicase activity	GO:0004003	10	0.831807	0.694871	3	25	1275	7383	FGRRES_02752,FGRRES_12711,FGRRES_06721,	0.989476
inorganic cation transmembrane transporter activity	GO:0022890	7	0.142077	1.21481	30	143	1275	7383	FGRRES_09681,FGRRES_09673,FGRRES_07832,FGRRES_11029,FGRRES_06685_M,FGRRES_04178,FGRRES_08697_M,FGRRES_00768,FGRRES_00371,FGRRES_02400,FGRRES_00773,FGRRES_02495,FGRRES_01364,FGRRES_01802,FGRRES_00880,FGRRES_17162,FGRRES_08264,FGRRES_10531,FGRRES_16433_M,FGRRES_16483,FGRRES_06513,FGRRES_17102,FGRRES_01230,FGRRES_00351_M,FGRRES_16803,FGRRES_01606,FGRRES_09515,FGRRES_11939,FGRRES_09153_M,FGRRES_05160,	0.993524
lipid binding	GO:0008289	3	0.853312	0.766401	9	68	1275	7383	FGRRES_13137,FGRRES_08485,FGRRES_16733,FGRRES_08739_M,FGRRES_10272,FGRRES_04308,FGRRES_16007,FGRRES_10111,FGRRES_10187,	0.9957
channel activity	GO:0015267	5	0.851548	0.668145	3	26	1275	7383	FGRRES_04178,FGRRES_01364,FGRRES_11939,	0.996016
passive transmembrane transporter activity	GO:0022803	4	0.851548	0.668145	3	26	1275	7383	FGRRES_04178,FGRRES_01364,FGRRES_11939,	0.996016
modification-dependent protein binding	GO:0140030	4	0.84353	0.643399	2	18	1275	7383	FGRRES_00297,FGRRES_00280_M,	0.996159
aminopeptidase activity	GO:0004177	7	0.844619	0.723824	5	40	1275	7383	FGRRES_02531,FGRRES_11411,FGRRES_01017,FGRRES_03562,FGRRES_06527,	0.996243
structural molecule activity	GO:0005198	2	1	0.0765276	3	227	1275	7383	FGRRES_17695,FGRRES_01699_M,FGRRES_09564,	1
oxidoreductase activity, acting on the aldehyde or oxo group of donors	GO:0016903	4	0.127376	1.39403	13	54	1275	7383	FGRRES_06752,FGRRES_09240,FGRRES_06127_M,FGRRES_04196,FGRRES_08426,FGRRES_05831,FGRRES_00325,FGRRES_03936,FGRRES_04309,FGRRES_07707,FGRRES_01141,FGRRES_04966,FGRRES_00979,	1
RNA polymerase II regulatory region DNA binding	GO:0001012	8	0.132354	1.54416	8	30	1275	7383	FGRRES_04288,FGRRES_09019,FGRRES_09565,FGRRES_16768_M,FGRRES_10868,FGRRES_16816_M,FGRRES_07020,FGRRES_04888_M,	1
carboxy-lyase activity	GO:0016831	5	0.136608	1.48901	9	35	1275	7383	FGRRES_02001,FGRRES_08061_M,FGRRES_13946,FGRRES_09035,FGRRES_03422,FGRRES_05903,FGRRES_03391,FGRRES_05156,FGRRES_10446,	1
organophosphate ester transmembrane transporter activity	GO:0015605	4	0.138182	1.9302	4	12	1275	7383	FGRRES_13127,FGRRES_00646,FGRRES_11069,FGRRES_04319,	1
isomerase activity	GO:0016853	3	0.139537	1.25645	23	106	1275	7383	FGRRES_10352,FGRRES_07180_M,FGRRES_16211,FGRRES_03066_M,FGRRES_12573,FGRRES_02852,FGRRES_07326,FGRRES_05843,FGRRES_06874,FGRRES_05330,FGRRES_06059,FGRRES_16921,FGRRES_00884,FGRRES_10118,FGRRES_09439_M,FGRRES_13888,FGRRES_12746,FGRRES_09940,FGRRES_03767,FGRRES_16807,FGRRES_01639,FGRRES_00590,FGRRES_00589,	1
oxygen binding	GO:0019825	3	0.140359	2.89529	2	4	1275	7383	FGRRES_07925,FGRRES_00765,	1
succinate-semialdehyde dehydrogenase [NAD(P)+] activity	GO:0009013	6	0.140359	2.89529	2	4	1275	7383	FGRRES_06752,FGRRES_04196,	1
pyridoxamine-phosphate oxidase activity	GO:0004733	6	0.140359	2.89529	2	4	1275	7383	FGRRES_09639,FGRRES_17247,	1
voltage-gated cation channel activity	GO:0022843	8	0.140359	2.89529	2	4	1275	7383	FGRRES_01364,FGRRES_11939,	1
malate dehydrogenase activity	GO:0016615	5	0.140359	2.89529	2	4	1275	7383	FGRRES_07191,FGRRES_15784,	1
oxidoreductase activity, acting on the CH-NH2 group of donors, NAD or NADP as acceptor	GO:0016639	5	0.140359	2.89529	2	4	1275	7383	FGRRES_04117,FGRRES_07174,	1
acylglycerol O-acyltransferase activity	GO:0016411	7	0.140359	2.89529	2	4	1275	7383	FGRRES_01349,FGRRES_06688,	1
intramolecular lyase activity	GO:0016872	4	0.140359	2.89529	2	4	1275	7383	FGRRES_03066_M,FGRRES_09940,	1
mannose-ethanolamine phosphotransferase activity	GO:0051377	6	0.140359	2.89529	2	4	1275	7383	FGRRES_10223,FGRRES_05591,	1
oxidoreductase activity, acting on CH or CH2 groups	GO:0016725	4	0.140359	2.89529	2	4	1275	7383	FGRRES_05409,FGRRES_05174,	1
double-stranded telomeric DNA binding	GO:0003691	7	0.140359	2.89529	2	4	1275	7383	FGRRES_01699_M,FGRRES_01157,	1
biotin carboxylase activity	GO:0004075	5	0.140359	2.89529	2	4	1275	7383	FGRRES_07075_M,FGRRES_08688_M,	1
branched-chain-amino-acid transaminase activity	GO:0004084	6	0.140359	2.89529	2	4	1275	7383	FGRRES_04570,FGRRES_00049,	1
DNA ligase (ATP) activity	GO:0003910	6	0.140359	2.89529	2	4	1275	7383	FGRRES_05453_M,FGRRES_04154_M,	1
flavin adenine dinucleotide binding	GO:0050660	5	0.144955	1.17532	41	202	1275	7383	FGRRES_03603,FGRRES_13137,FGRRES_11492,FGRRES_13110,FGRRES_11407,FGRRES_17337,FGRRES_11081,FGRRES_04130,FGRRES_03593,FGRRES_08402,FGRRES_08462,FGRRES_06478,FGRRES_00765,FGRRES_10609,FGRRES_02433,FGRRES_01819_M,FGRRES_04732,FGRRES_05374,FGRRES_11228,FGRRES_02477_M,FGRRES_06539,FGRRES_16027,FGRRES_16026,FGRRES_03824,FGRRES_03370,FGRRES_03373,FGRRES_13875,FGRRES_04368,FGRRES_08694,FGRRES_04335,FGRRE…	1
iron ion transmembrane transporter activity	GO:0005381	10	0.146248	2.17147	3	8	1275	7383	FGRRES_07832,FGRRES_11029,FGRRES_05160,	1
inorganic phosphate transmembrane transporter activity	GO:0005315	6	0.146248	2.17147	3	8	1275	7383	FGRRES_07894,FGRRES_05659,FGRRES_01230,	1
hydrolase activity, acting on carbon-nitrogen (but not peptide) bonds	GO:0016810	4	0.152736	1.24895	22	102	1275	7383	FGRRES_09638,FGRRES_05739,FGRRES_00271,FGRRES_08908,FGRRES_07837,FGRRES_17173_M,FGRRES_02893,FGRRES_06480,FGRRES_06433,FGRRES_03933,FGRRES_05323,FGRRES_13956,FGRRES_10967,FGRRES_01567,FGRRES_04819,FGRRES_04087_M,FGRRES_10599,FGRRES_05446,FGRRES_13483,FGRRES_03544_M,FGRRES_11158,FGRRES_00051,	1
transcription regulatory region sequence-specific DNA binding	GO:0000976	8	0.152917	1.49435	8	31	1275	7383	FGRRES_04288,FGRRES_09019,FGRRES_09565,FGRRES_16768_M,FGRRES_10868,FGRRES_16816_M,FGRRES_07020,FGRRES_04888_M,	1
acetylglucosaminyltransferase activity	GO:0008375	6	0.156003	1.70311	5	17	1275	7383	FGRRES_16273_M,FGRRES_10116,FGRRES_10117,FGRRES_01964,FGRRES_17491,	1
transferase activity, transferring acyl groups other than amino-acyl groups	GO:0016747	5	0.157624	1.18602	34	166	1275	7383	FGRRES_07893,FGRRES_07896,FGRRES_00237,FGRRES_03392_M,FGRRES_03149,FGRRES_04560,FGRRES_13873_M,FGRRES_06307,FGRRES_04102,FGRRES_06542_M,FGRRES_00377,FGRRES_03006,FGRRES_09723,FGRRES_04208,FGRRES_09139_40_17163_M,FGRRES_01349,FGRRES_03854_M,FGRRES_13979,FGRRES_15680_M,FGRRES_07600,FGRRES_01980,FGRRES_09863,FGRRES_11656,FGRRES_07598,FGRRES_00117,FGRRES_07592,FGRRES_03758,FGRRES_00280_M,FGRRES_20330…	1
oxidoreductase activity, acting on the aldehyde or oxo group of donors, NAD or NADP as acceptor	GO:0016620	5	0.157985	1.38471	11	46	1275	7383	FGRRES_06752,FGRRES_06127_M,FGRRES_04196,FGRRES_08426,FGRRES_05831,FGRRES_00325,FGRRES_03936,FGRRES_07707,FGRRES_01141,FGRRES_04966,FGRRES_00979,	1
nucleotide binding	GO:0000166	4	0.163668	1.05698	232	1271	1275	7383	FGRRES_03603,FGRRES_16266,FGRRES_09639,FGRRES_09638,FGRRES_13137,FGRRES_17398,FGRRES_11492,FGRRES_13110,FGRRES_05733,FGRRES_16299,FGRRES_00680,FGRRES_09681,FGRRES_09684,FGRRES_10725,FGRRES_02130,FGRRES_06274,FGRRES_17372,FGRRES_07842,FGRRES_06127_M,FGRRES_03848_M,FGRRES_11407,FGRRES_04580,FGRRES_17337,FGRRES_17287_M,FGRRES_11019,FGRRES_02539,FGRRES_17709_M,FGRRES_02540,FGRRES_11081,FGRRES_06206,F…	1
nucleoside phosphate binding	GO:1901265	4	0.163668	1.05698	232	1271	1275	7383	FGRRES_03603,FGRRES_16266,FGRRES_09639,FGRRES_09638,FGRRES_13137,FGRRES_17398,FGRRES_11492,FGRRES_13110,FGRRES_05733,FGRRES_16299,FGRRES_00680,FGRRES_09681,FGRRES_09684,FGRRES_10725,FGRRES_02130,FGRRES_06274,FGRRES_17372,FGRRES_07842,FGRRES_06127_M,FGRRES_03848_M,FGRRES_11407,FGRRES_04580,FGRRES_17337,FGRRES_17287_M,FGRRES_11019,FGRRES_02539,FGRRES_17709_M,FGRRES_02540,FGRRES_11081,FGRRES_06206,F…	1
beta-glucosidase activity	GO:0008422	7	0.16606	1.57925	6	22	1275	7383	FGRRES_08623_M,FGRRES_12586,FGRRES_03570_M,FGRRES_17402,FGRRES_02632,FGRRES_11181,	1
anion binding	GO:0043168	4	0.169605	1.05574	231	1267	1275	7383	FGRRES_03603,FGRRES_16266,FGRRES_09639,FGRRES_09638,FGRRES_13137,FGRRES_10392,FGRRES_17398,FGRRES_06751,FGRRES_11492,FGRRES_13110,FGRRES_00296,FGRRES_16299,FGRRES_08485,FGRRES_00680,FGRRES_09681,FGRRES_09684,FGRRES_10725,FGRRES_02130,FGRRES_04256_M,FGRRES_06274,FGRRES_17372,FGRRES_07842,FGRRES_03848_M,FGRRES_11407,FGRRES_04580,FGRRES_17337,FGRRES_11019,FGRRES_17709_M,FGRRES_02540,FGRRES_11081,FGR…	1
trans-hexaprenyltranstransferase activity	GO:0000010	5	0.172694	5.79059	1	1	1275	7383	FGRRES_10933,	1
Ser-tRNA(Ala) hydrolase activity	GO:0002196	7	0.172694	5.79059	1	1	1275	7383	FGRRES_16356,	1
homoserine kinase activity	GO:0004413	6	0.172694	5.79059	1	1	1275	7383	FGRRES_10211,	1
glycogen (starch) synthase activity	GO:0004373	7	0.172694	5.79059	1	1	1275	7383	FGRRES_06822,	1
acetate kinase activity	GO:0008776	6	0.172694	5.79059	1	1	1275	7383	FGRRES_15842,	1
secondary active monocarboxylate transmembrane transporter activity	GO:0015355	8	0.172694	5.79059	1	1	1275	7383	FGRRES_04204,	1
glutamate dehydrogenase (NADP+) activity	GO:0004354	7	0.172694	5.79059	1	1	1275	7383	FGRRES_07174,	1
glutamate dehydrogenase (NAD+) activity	GO:0004352	7	0.172694	5.79059	1	1	1275	7383	FGRRES_04117,	1
glutamine-fructose-6-phosphate transaminase (isomerizing) activity	GO:0004360	7	0.172694	5.79059	1	1	1275	7383	FGRRES_01199,	1
bis(5'-nucleosyl)-tetraphosphatase activity	GO:0008796	8	0.172694	5.79059	1	1	1275	7383	FGRRES_09805,	1
long-chain fatty acid-CoA ligase activity	GO:0004467	6	0.172694	5.79059	1	1	1275	7383	FGRRES_01419,	1
NAD(P)+ transhydrogenase (AB-specific) activity	GO:0008750	7	0.172694	5.79059	1	1	1275	7383	FGRRES_09006_M,	1
NAD(P)+ transhydrogenase activity	GO:0008746	6	0.172694	5.79059	1	1	1275	7383	FGRRES_09006_M,	1
malate synthase activity	GO:0004474	6	0.172694	5.79059	1	1	1275	7383	FGRRES_08700,	1
ketol-acid reductoisomerase activity	GO:0004455	6	0.172694	5.79059	1	1	1275	7383	FGRRES_10118,	1
alpha-ketoglutarate-dependent xanthine dioxygenase activity	GO:0097641	5	0.172694	5.79059	1	1	1275	7383	FGRRES_16031,	1
L-methionine secondary active transmembrane transporter activity	GO:0000102	10	0.172694	5.79059	1	1	1275	7383	FGRRES_02145,	1
DNA-3-methyladenine glycosylase activity	GO:0008725	9	0.172694	5.79059	1	1	1275	7383	FGRRES_10090,	1
uniporter activity	GO:0015292	6	0.172694	5.79059	1	1	1275	7383	FGRRES_07131,	1
nitrite reductase [NAD(P)H] activity	GO:0008942	6	0.172694	5.79059	1	1	1275	7383	FGRRES_08402,	1
L-aspartate transmembrane transporter activity	GO:0015183	9	0.172694	5.79059	1	1	1275	7383	FGRRES_07131,	1
inositol-4,5-bisphosphate 5-phosphatase activity	GO:0030487	9	0.172694	5.79059	1	1	1275	7383	FGRRES_01243,	1
inositol-3-phosphate synthase activity	GO:0004512	5	0.172694	5.79059	1	1	1275	7383	FGRRES_09940,	1
L-glutamine aminotransferase activity	GO:0070548	6	0.172694	5.79059	1	1	1275	7383	FGRRES_01199,	1
recombinase activity	GO:0000150	3	0.172694	5.79059	1	1	1275	7383	FGRRES_01157,	1
sphingosine hydroxylase activity	GO:0000170	4	0.172694	5.79059	1	1	1275	7383	FGRRES_02522,	1
urea transmembrane transporter activity	GO:0015204	6	0.172694	5.79059	1	1	1275	7383	FGRRES_03111,	1
inositol hexakisphosphate 1-kinase activity	GO:0052723	7	0.172694	5.79059	1	1	1275	7383	FGRRES_05079,	1
FAD transmembrane transporter activity	GO:0015230	8	0.172694	5.79059	1	1	1275	7383	FGRRES_13127,	1
inositol hexakisphosphate 3-kinase activity	GO:0052724	7	0.172694	5.79059	1	1	1275	7383	FGRRES_05079,	1
methylenetetrahydrofolate dehydrogenase (NAD+) activity	GO:0004487	6	0.172694	5.79059	1	1	1275	7383	FGRRES_00417,	1
antimonite transmembrane transporter activity	GO:0015104	8	0.172694	5.79059	1	1	1275	7383	FGRRES_06579,	1
nitrate reductase [NAD(P)H] activity	GO:0050463	6	0.172694	5.79059	1	1	1275	7383	FGRRES_17337,	1
nitrite transmembrane transporter activity	GO:0015113	8	0.172694	5.79059	1	1	1275	7383	FGRRES_00416,	1
nitrate transmembrane transporter activity	GO:0015112	8	0.172694	5.79059	1	1	1275	7383	FGRRES_00416,	1
ornithine decarboxylase activity	GO:0004586	6	0.172694	5.79059	1	1	1275	7383	FGRRES_05903,	1
di-trans,poly-cis-decaprenylcistransferase activity	GO:0008834	6	0.172694	5.79059	1	1	1275	7383	FGRRES_10933,	1
peptide-N4-(N-acetyl-beta-glucosaminyl)asparagine amidase activity	GO:0000224	6	0.172694	5.79059	1	1	1275	7383	FGRRES_00271,	1
formate dehydrogenase (NAD+) activity	GO:0008863	6	0.172694	5.79059	1	1	1275	7383	FGRRES_06127_M,	1
fatty acid alpha-hydroxylase activity	GO:0080132	4	0.172694	5.79059	1	1	1275	7383	FGRRES_05164,	1
nitrate reductase (NADPH) activity	GO:0050464	6	0.172694	5.79059	1	1	1275	7383	FGRRES_15910,	1
borate efflux transmembrane transporter activity	GO:0080139	5	0.172694	5.79059	1	1	1275	7383	FGRRES_06815_M,	1
inositol-1,4,5-trisphosphate 5-phosphatase activity	GO:0052658	9	0.172694	5.79059	1	1	1275	7383	FGRRES_01243,	1
inositol-1,3,4,5-tetrakisphosphate 5-phosphatase activity	GO:0052659	9	0.172694	5.79059	1	1	1275	7383	FGRRES_01243,	1
cytochrome-c peroxidase activity	GO:0004130	4	0.172694	5.79059	1	1	1275	7383	FGRRES_01245,	1
nitrilase activity	GO:0000257	6	0.172694	5.79059	1	1	1275	7383	FGRRES_06480,	1
nickel cation transmembrane transporter activity	GO:0015099	10	0.172694	5.79059	1	1	1275	7383	FGRRES_06513,	1
DNA-3-methylbase glycosylase activity	GO:0043733	8	0.172694	5.79059	1	1	1275	7383	FGRRES_10090,	1
cholinesterase activity	GO:0004104	6	0.172694	5.79059	1	1	1275	7383	FGRRES_05935,	1
cadmium ion transmembrane transporter activity	GO:0015086	10	0.172694	5.79059	1	1	1275	7383	FGRRES_09681,	1
cystathionine beta-synthase activity	GO:0004122	6	0.172694	5.79059	1	1	1275	7383	FGRRES_06544,	1
cystathionine gamma-lyase activity	GO:0004123	5	0.172694	5.79059	1	1	1275	7383	FGRRES_01177,	1
sulfide:quinone oxidoreductase activity	GO:0070224	6	0.172694	5.79059	1	1	1275	7383	FGRRES_03259,	1
scytalone dehydratase activity	GO:0030411	6	0.172694	5.79059	1	1	1275	7383	FGRRES_06477,	1
rRNA (guanine-N1-)-methyltransferase activity	GO:0008989	7	0.172694	5.79059	1	1	1275	7383	FGRRES_10175,	1
pyruvate, water dikinase activity	GO:0008986	6	0.172694	5.79059	1	1	1275	7383	FGRRES_10445,	1
N-acylphosphatidylethanolamine-specific phospholipase D activity	GO:0070290	7	0.172694	5.79059	1	1	1275	7383	FGRRES_09261,	1
inositol trisphosphate phosphatase activity	GO:0046030	8	0.172694	5.79059	1	1	1275	7383	FGRRES_01243,	1
sedoheptulose-bisphosphatase activity	GO:0050278	7	0.172694	5.79059	1	1	1275	7383	FGRRES_08922,	1
phenylpyruvate decarboxylase activity	GO:0050177	6	0.172694	5.79059	1	1	1275	7383	FGRRES_10446,	1
glucose-6-phosphate isomerase activity	GO:0004347	6	0.172694	5.79059	1	1	1275	7383	FGRRES_05843,	1
glucose-6-phosphate dehydrogenase activity	GO:0004345	6	0.172694	5.79059	1	1	1275	7383	FGRRES_01279,	1
molybdopterin cofactor binding	GO:0043546	5	0.172694	5.79059	1	1	1275	7383	FGRRES_15910,	1
geraniol dehydrogenase activity	GO:0047924	6	0.172694	5.79059	1	1	1275	7383	FGRRES_01686,	1
MAP kinase tyrosine phosphatase activity	GO:0033550	9	0.172694	5.79059	1	1	1275	7383	FGRRES_06977,	1
MAP kinase phosphatase activity	GO:0033549	8	0.172694	5.79059	1	1	1275	7383	FGRRES_06977,	1
aldehyde dehydrogenase (NADP+) activity	GO:0033721	6	0.172694	5.79059	1	1	1275	7383	FGRRES_00979,	1
D-arabinose 1-dehydrogenase [NAD(P)+] activity	GO:0045290	6	0.172694	5.79059	1	1	1275	7383	FGRRES_07908,	1
SUMO binding	GO:0032183	5	0.172694	5.79059	1	1	1275	7383	FGRRES_08540,	1
ATP-dependent DNA/RNA helicase activity	GO:0033680	11	0.172694	5.79059	1	1	1275	7383	FGRRES_02752,	1
DNA/RNA helicase activity	GO:0033677	9	0.172694	5.79059	1	1	1275	7383	FGRRES_02752,	1
steroid dehydrogenase activity, acting on the CH-CH group of donors	GO:0033765	5	0.172694	5.79059	1	1	1275	7383	FGRRES_01618,	1
4-trimethylammoniobutyraldehyde dehydrogenase activity	GO:0047105	6	0.172694	5.79059	1	1	1275	7383	FGRRES_00979,	1
nitrite reductase activity	GO:0098809	5	0.172694	5.79059	1	1	1275	7383	FGRRES_08402,	1
phosphoenolpyruvate carboxykinase (ATP) activity	GO:0004612	7	0.172694	5.79059	1	1	1275	7383	FGRRES_08061_M,	1
lycopene beta cyclase activity	GO:0045436	4	0.172694	5.79059	1	1	1275	7383	FGRRES_03066_M,	1
phosphoenolpyruvate carboxykinase activity	GO:0004611	6	0.172694	5.79059	1	1	1275	7383	FGRRES_08061_M,	1
inositol hexakisphosphate 6-kinase activity	GO:0000831	7	0.172694	5.79059	1	1	1275	7383	FGRRES_05079,	1
inositol hexakisphosphate 4-kinase activity	GO:0000830	7	0.172694	5.79059	1	1	1275	7383	FGRRES_05079,	1
NADHX epimerase activity	GO:0052856	5	0.172694	5.79059	1	1	1275	7383	FGRRES_09439_M,	1
phosphopyruvate hydratase activity	GO:0004634	6	0.172694	5.79059	1	1	1275	7383	FGRRES_01346,	1
monocarboxylic acid binding	GO:0033293	6	0.172694	5.79059	1	1	1275	7383	FGRRES_07075_M,	1
porphobilinogen synthase activity	GO:0004655	6	0.172694	5.79059	1	1	1275	7383	FGRRES_10080,	1
inositol pentakisphosphate phosphatase activity	GO:0052827	8	0.172694	5.79059	1	1	1275	7383	FGRRES_01243,	1
cadmium-exporting ATPase activity	GO:0008551	11	0.172694	5.79059	1	1	1275	7383	FGRRES_09681,	1
protein-arginine deiminase activity	GO:0004668	6	0.172694	5.79059	1	1	1275	7383	FGRRES_02893,	1
prephenate dehydratase activity	GO:0004664	6	0.172694	5.79059	1	1	1275	7383	FGRRES_05482,	1
alanine-glyoxylate transaminase activity	GO:0008453	6	0.172694	5.79059	1	1	1275	7383	FGRRES_10893_M,	1
inositol tetrakisphosphate phosphatase activity	GO:0052743	8	0.172694	5.79059	1	1	1275	7383	FGRRES_01243,	1
inositol phosphate phosphatase activity	GO:0052745	7	0.172694	5.79059	1	1	1275	7383	FGRRES_01243,	1
purine-nucleoside phosphorylase activity	GO:0004731	6	0.172694	5.79059	1	1	1275	7383	FGRRES_08458,	1
ribulose-phosphate 3-epimerase activity	GO:0004750	6	0.172694	5.79059	1	1	1275	7383	FGRRES_00589,	1
2,4-dienoyl-CoA reductase (NADPH) activity	GO:0008670	6	0.172694	5.79059	1	1	1275	7383	FGRRES_00407,	1
pyruvate carboxylase activity	GO:0004736	5	0.172694	5.79059	1	1	1275	7383	FGRRES_07075_M,	1
shikimate kinase activity	GO:0004765	6	0.172694	5.79059	1	1	1275	7383	FGRRES_04287,	1
phenylalanine ammonia-lyase activity	GO:0045548	6	0.172694	5.79059	1	1	1275	7383	FGRRES_09311,	1
sulfite reductase (NADPH) activity	GO:0004783	6	0.172694	5.79059	1	1	1275	7383	FGRRES_02482,	1
tRNA (guanine(37)-N(1))-methyltransferase activity	GO:0052906	10	0.172694	5.79059	1	1	1275	7383	FGRRES_01254,	1
urate oxidase activity	GO:0004846	6	0.172694	5.79059	1	1	1275	7383	FGRRES_04126,	1
trichothecene 3-O-acetyltransferase activity	GO:0045462	8	0.172694	5.79059	1	1	1275	7383	FGRRES_07896,	1
medium-chain fatty acid-CoA ligase activity	GO:0031956	6	0.172694	5.79059	1	1	1275	7383	FGRRES_01419,	1
uridine kinase activity	GO:0004849	8	0.172694	5.79059	1	1	1275	7383	FGRRES_02476,	1
1-phosphatidylinositol-4-phosphate 5-kinase activity	GO:0016308	7	0.172694	5.79059	1	1	1275	7383	FGRRES_17518,	1
inositol bisphosphate phosphatase activity	GO:0016312	8	0.172694	5.79059	1	1	1275	7383	FGRRES_01243,	1
nucleoside:sodium symporter activity	GO:0005415	7	0.172694	5.79059	1	1	1275	7383	FGRRES_10531,	1
peptidyl-proline dioxygenase activity	GO:0031543	6	0.172694	5.79059	1	1	1275	7383	FGRRES_00590,	1
borate transmembrane transporter activity	GO:0046715	8	0.172694	5.79059	1	1	1275	7383	FGRRES_06815_M,	1
formyltetrahydrofolate dehydrogenase activity	GO:0016155	6	0.172694	5.79059	1	1	1275	7383	FGRRES_00979,	1
phytoene dehydrogenase activity	GO:0016166	5	0.172694	5.79059	1	1	1275	7383	FGRRES_16340_M,	1
histidine phosphotransfer kinase activity	GO:0009927	3	0.172694	5.79059	1	1	1275	7383	FGRRES_10042,	1
saccharopine oxidase activity	GO:0051698	6	0.172694	5.79059	1	1	1275	7383	FGRRES_08462,	1
phosphotransferase activity, paired acceptors	GO:0016781	5	0.172694	5.79059	1	1	1275	7383	FGRRES_10445,	1
mediator complex binding	GO:0036033	5	0.172694	5.79059	1	1	1275	7383	FGRRES_16007,	1
phytoene synthase activity	GO:0046905	3	0.172694	5.79059	1	1	1275	7383	FGRRES_03066_M,	1
hydrolase activity, acting on carbon-nitrogen (but not peptide) bonds, in nitriles	GO:0016815	5	0.172694	5.79059	1	1	1275	7383	FGRRES_06480,	1
exo-poly-alpha-galacturonosidase activity	GO:0033917	6	0.172694	5.79059	1	1	1275	7383	FGRRES_07551,	1
azetidine-2-carboxylic acid acetyltransferase activity	GO:0046941	8	0.172694	5.79059	1	1	1275	7383	FGRRES_06307,	1
pyruvyltransferase activity	GO:0046919	6	0.172694	5.79059	1	1	1275	7383	FGRRES_02698,	1
protein-glutamine N-methyltransferase activity	GO:0036009	7	0.172694	5.79059	1	1	1275	7383	FGRRES_01870,	1
high-affinity nickel cation transmembrane transporter activity	GO:0044750	11	0.172694	5.79059	1	1	1275	7383	FGRRES_06513,	1
oxidoreductase activity, acting on NAD(P)H, NAD(P) as acceptor	GO:0016652	5	0.172694	5.79059	1	1	1275	7383	FGRRES_09006_M,	1
ATPase activity, uncoupled	GO:0042624	9	0.172694	5.79059	1	1	1275	7383	FGRRES_02025,	1
oxidoreductase activity, acting on a sulfur group of donors, quinone or similar compound as acceptor	GO:0016672	5	0.172694	5.79059	1	1	1275	7383	FGRRES_03259,	1
ornithine carbamoyltransferase inhibitor activity	GO:0090369	5	0.172694	5.79059	1	1	1275	7383	FGRRES_10967,	1
neutral L-amino acid secondary active transmembrane transporter activity	GO:0005294	9	0.172694	5.79059	1	1	1275	7383	FGRRES_02145,	1
guanine nucleotide transmembrane transporter activity	GO:0001409	7	0.172694	5.79059	1	1	1275	7383	FGRRES_00646,	1
geranylgeranyl-diphosphate geranylgeranyltransferase activity	GO:0016767	7	0.172694	5.79059	1	1	1275	7383	FGRRES_03066_M,	1
sodium channel activity	GO:0005272	8	0.172694	5.79059	1	1	1275	7383	FGRRES_04178,	1
calcium-dependent protein binding	GO:0048306	4	0.172694	5.79059	1	1	1275	7383	FGRRES_01891_M,	1
S-methyl-5-thioadenosine phosphorylase activity	GO:0017061	7	0.172694	5.79059	1	1	1275	7383	FGRRES_08458,	1
mannitol 2-dehydrogenase activity	GO:0050086	6	0.172694	5.79059	1	1	1275	7383	FGRRES_03311,	1
adenylate cyclase binding	GO:0008179	5	0.172694	5.79059	1	1	1275	7383	FGRRES_01923,	1
selenite:proton symporter activity	GO:0097079	7	0.172694	5.79059	1	1	1275	7383	FGRRES_04204,	1
nicotinamide mononucleotide transmembrane transporter activity	GO:0015663	6	0.172694	5.79059	1	1	1275	7383	FGRRES_11069,	1
euchromatin binding	GO:1990188	4	0.172694	5.79059	1	1	1275	7383	FGRRES_09025,	1
biotin binding	GO:0009374	5	0.172694	5.79059	1	1	1275	7383	FGRRES_07075_M,	1
ferric-enterobactin transmembrane transporter activity	GO:0015620	12	0.172694	5.79059	1	1	1275	7383	FGRRES_11029,	1
sulfinylpropanyl adenylate synthase	GO:0061483	5	0.172694	5.79059	1	1	1275	7383	FGRRES_05187_M,	1
histone-glutamine methyltransferase activity	GO:1990259	8	0.172694	5.79059	1	1	1275	7383	FGRRES_01870,	1
MAP kinase tyrosine/serine/threonine phosphatase activity	GO:0017017	9	0.172694	5.79059	1	1	1275	7383	FGRRES_06977,	1
flavin-linked sulfhydryl oxidase activity	GO:0016971	7	0.172694	5.79059	1	1	1275	7383	FGRRES_09833,	1
aspartate carbamoyltransferase activity	GO:0004070	6	0.172694	5.79059	1	1	1275	7383	FGRRES_09638,	1
biotin synthase activity	GO:0004076	6	0.172694	5.79059	1	1	1275	7383	FGRRES_00278,	1
bis(5'-nucleosyl)-tetraphosphatase (asymmetrical) activity	GO:0004081	9	0.172694	5.79059	1	1	1275	7383	FGRRES_09805,	1
putrescine transmembrane transporter activity	GO:0015489	8	0.172694	5.79059	1	1	1275	7383	FGRRES_03111,	1
arginase activity	GO:0004053	6	0.172694	5.79059	1	1	1275	7383	FGRRES_10967,	1
inositol-1,2,4,5-tetrakisphosphate 5-phosphatase activity	GO:1990649	9	0.172694	5.79059	1	1	1275	7383	FGRRES_01243,	1
inositol-4,5,6-triphosphate 5-phosphatase activity	GO:1990648	9	0.172694	5.79059	1	1	1275	7383	FGRRES_01243,	1
inositol-1,2,4,5,6-pentakisphosphate 5-phosphatase activity	GO:1990651	9	0.172694	5.79059	1	1	1275	7383	FGRRES_01243,	1
inositol-2,4,5,6-tetrakisphosphate 5-phosphatase activity	GO:1990650	9	0.172694	5.79059	1	1	1275	7383	FGRRES_01243,	1
adenosine kinase activity	GO:0004001	6	0.172694	5.79059	1	1	1275	7383	FGRRES_16741,	1
inositol-2,4,5-triphosphate 5-phosphatase activity	GO:1990640	9	0.172694	5.79059	1	1	1275	7383	FGRRES_01243,	1
adenosylmethionine decarboxylase activity	GO:0004014	6	0.172694	5.79059	1	1	1275	7383	FGRRES_09035,	1
efflux transmembrane transporter activity	GO:0015562	4	0.172694	5.79059	1	1	1275	7383	FGRRES_06815_M,	1
N2-acetyl-L-ornithine:2-oxoglutarate 5-aminotransferase activity	GO:0003992	6	0.172694	5.79059	1	1	1275	7383	FGRRES_01573,	1
protein tyrosine phosphatase activity, metal-dependent	GO:0030946	9	0.172694	5.79059	1	1	1275	7383	FGRRES_04986,	1
deoxyribodipyrimidine photo-lyase activity	GO:0003904	6	0.172694	5.79059	1	1	1275	7383	FGRRES_00797,	1
alkylbase DNA N-glycosylase activity	GO:0003905	7	0.172694	5.79059	1	1	1275	7383	FGRRES_10090,	1
CDP-diacylglycerol-inositol 3-phosphatidyltransferase activity	GO:0003881	7	0.172694	5.79059	1	1	1275	7383	FGRRES_05154,	1
phosphatidylinositol-3,4,5-trisphosphate 5-phosphatase activity	GO:0034485	9	0.172694	5.79059	1	1	1275	7383	FGRRES_01243,	1
2-isopropylmalate synthase activity	GO:0003852	6	0.172694	5.79059	1	1	1275	7383	FGRRES_16692_M,	1
1,4-alpha-glucan branching enzyme activity	GO:0003844	6	0.172694	5.79059	1	1	1275	7383	FGRRES_04313,	1
1,3-beta-D-glucan synthase activity	GO:0003843	7	0.172694	5.79059	1	1	1275	7383	FGRRES_07946,	1
nitrate reductase (NADH) activity	GO:0009703	6	0.172694	5.79059	1	1	1275	7383	FGRRES_17337,	1
sulfur-containing amino acid secondary active transmembrane transporter activity	GO:1901680	9	0.172694	5.79059	1	1	1275	7383	FGRRES_02145,	1
4-hydroxyphenylpyruvate dioxygenase activity	GO:0003868	6	0.172694	5.79059	1	1	1275	7383	FGRRES_06001,	1
3-phosphoshikimate 1-carboxyvinyltransferase activity	GO:0003866	5	0.172694	5.79059	1	1	1275	7383	FGRRES_04287,	1
3-oxo-5-alpha-steroid 4-dehydrogenase activity	GO:0003865	6	0.172694	5.79059	1	1	1275	7383	FGRRES_01618,	1
S-(hydroxymethyl)glutathione synthase activity	GO:0051907	5	0.172694	5.79059	1	1	1275	7383	FGRRES_10776_M,	1
3-methyl-2-oxobutanoate hydroxymethyltransferase activity	GO:0003864	6	0.172694	5.79059	1	1	1275	7383	FGRRES_09312,	1
3-isopropylmalate dehydratase activity	GO:0003861	6	0.172694	5.79059	1	1	1275	7383	FGRRES_09589,	1
3-dehydroquinate synthase activity	GO:0003856	6	0.172694	5.79059	1	1	1275	7383	FGRRES_04287,	1
xylanase activity	GO:0097599	6	0.849994	0.579059	1	10	1275	7383	FGRRES_08946,	1
cyclin-dependent protein serine/threonine kinase regulator activity	GO:0016538	6	0.849994	0.579059	1	10	1275	7383	FGRRES_00941,	1
thiolester hydrolase activity	GO:0016790	5	0.849994	0.579059	1	10	1275	7383	FGRRES_02848,	1
hydroxymethyl-, formyl- and related transferase activity	GO:0016742	5	0.849994	0.579059	1	10	1275	7383	FGRRES_09312,	1
transcription corepressor activity	GO:0003714	5	0.849994	0.579059	1	10	1275	7383	FGRRES_09279,	1
kinase inhibitor activity	GO:0019210	5	0.849994	0.579059	1	10	1275	7383	FGRRES_07557,	1
purine NTP-dependent helicase activity	GO:0070035	9	0.859495	0.723824	6	48	1275	7383	FGRRES_05687,FGRRES_16145,FGRRES_02752,FGRRES_12711,FGRRES_04350,FGRRES_06721,	1
ATP-dependent helicase activity	GO:0008026	10	0.859495	0.723824	6	48	1275	7383	FGRRES_05687,FGRRES_16145,FGRRES_02752,FGRRES_12711,FGRRES_04350,FGRRES_06721,	1
carboxylic ester hydrolase activity	GO:0052689	5	0.860521	0.736984	7	55	1275	7383	FGRRES_02890,FGRRES_16175,FGRRES_07671,FGRRES_03846,FGRRES_05935,FGRRES_05937,FGRRES_16356,	1
transferase activity, transferring phosphorus-containing groups	GO:0016772	4	0.862524	0.901025	75	482	1275	7383	FGRRES_03603,FGRRES_06368,FGRRES_17398,FGRRES_16299,FGRRES_10725,FGRRES_06206,FGRRES_16741,FGRRES_16693,FGRRES_04619,FGRRES_01445,FGRRES_01430,FGRRES_00621,FGRRES_08426,FGRRES_16964_M,FGRRES_07949,FGRRES_17656,FGRRES_00365,FGRRES_00786,FGRRES_10211,FGRRES_10606,FGRRES_10223,FGRRES_02449,FGRRES_06420,FGRRES_16633,FGRRES_02476,FGRRES_16560,FGRRES_13516,FGRRES_08061_M,FGRRES_01329,FGRRES_01699_M,FGR…	1
carboxypeptidase activity	GO:0004180	7	0.862548	0.681246	4	34	1275	7383	FGRRES_10145,FGRRES_03769,FGRRES_04239_M,FGRRES_00017,	1
protein kinase binding	GO:0019901	6	0.864919	0.609536	2	19	1275	7383	FGRRES_08467,FGRRES_05630_M,	1
signal sequence binding	GO:0005048	5	0.864919	0.609536	2	19	1275	7383	FGRRES_01854,FGRRES_02233,	1
ribosome binding	GO:0043022	5	0.864919	0.609536	2	19	1275	7383	FGRRES_08737,FGRRES_17102,	1
histone binding	GO:0042393	4	0.869237	0.643399	3	27	1275	7383	FGRRES_00297,FGRRES_16007,FGRRES_00280_M,	1
vitamin B6 binding	GO:0070279	5	0.870802	0.767427	11	83	1275	7383	FGRRES_06751,FGRRES_00296,FGRRES_04256_M,FGRRES_04102,FGRRES_08821,FGRRES_12518,FGRRES_17216,FGRRES_07606,FGRRES_01177,FGRRES_01573,FGRRES_03391,	1
pyridoxal phosphate binding	GO:0030170	5	0.870802	0.767427	11	83	1275	7383	FGRRES_06751,FGRRES_00296,FGRRES_04256_M,FGRRES_04102,FGRRES_08821,FGRRES_12518,FGRRES_17216,FGRRES_07606,FGRRES_01177,FGRRES_01573,FGRRES_03391,	1
transcription factor activity, transcription factor binding	GO:0000989	3	0.873948	0.735313	8	63	1275	7383	FGRRES_09279,FGRRES_06948,FGRRES_16007,FGRRES_10148,FGRRES_10179,FGRRES_06573,FGRRES_01279,FGRRES_09982,	1
protein serine/threonine kinase activity	GO:0004674	7	0.874002	0.772078	12	90	1275	7383	FGRRES_16299,FGRRES_06206,FGRRES_16693,FGRRES_06420,FGRRES_16633,FGRRES_01312,FGRRES_13319,FGRRES_09408,FGRRES_07150,FGRRES_00469,FGRRES_17001,FGRRES_05547,	1
adenylyltransferase activity	GO:0070566	6	0.875934	0.526417	1	11	1275	7383	FGRRES_02259,	1
NADH dehydrogenase (ubiquinone) activity	GO:0008137	7	0.875934	0.526417	1	11	1275	7383	FGRRES_05749,	1
NADH dehydrogenase (quinone) activity	GO:0050136	6	0.875934	0.526417	1	11	1275	7383	FGRRES_05749,	1
NADH dehydrogenase activity	GO:0003954	5	0.875934	0.526417	1	11	1275	7383	FGRRES_05749,	1
endoribonuclease activity	GO:0004521	7	0.877463	0.661782	4	35	1275	7383	FGRRES_00348,FGRRES_09025,FGRRES_04408,FGRRES_03379,	1
nucleic acid binding transcription factor activity	GO:0001071	2	0.879168	0.901897	88	565	1275	7383	FGRRES_16912_M,FGRRES_13110,FGRRES_17377,FGRRES_00217,FGRRES_02531,FGRRES_03683,FGRRES_16703,FGRRES_16223,FGRRES_15866_M,FGRRES_15730_M,FGRRES_16245,FGRRES_16256,FGRRES_11891,FGRRES_04109,FGRRES_03219,FGRRES_14003_M,FGRRES_16663_M,FGRRES_04655,FGRRES_07921,FGRRES_07310,FGRRES_16137,FGRRES_17662,FGRRES_04170_M,FGRRES_00313,FGRRES_03912,FGRRES_08769,FGRRES_15926,FGRRES_16446_M,FGRRES_15940,FGRRES_1…	1
transcription factor activity, sequence-specific DNA binding	GO:0003700	3	0.879168	0.901897	88	565	1275	7383	FGRRES_16912_M,FGRRES_13110,FGRRES_17377,FGRRES_00217,FGRRES_02531,FGRRES_03683,FGRRES_16703,FGRRES_16223,FGRRES_15866_M,FGRRES_15730_M,FGRRES_16245,FGRRES_16256,FGRRES_11891,FGRRES_04109,FGRRES_03219,FGRRES_14003_M,FGRRES_16663_M,FGRRES_04655,FGRRES_07921,FGRRES_07310,FGRRES_16137,FGRRES_17662,FGRRES_04170_M,FGRRES_00313,FGRRES_03912,FGRRES_08769,FGRRES_15926,FGRRES_16446_M,FGRRES_15940,FGRRES_1…	1
active ion transmembrane transporter activity	GO:0022853	6	0.884629	0.694871	6	50	1275	7383	FGRRES_09681,FGRRES_08466,FGRRES_02400,FGRRES_09515,FGRRES_02677,FGRRES_15855_M,	1
protein methyltransferase activity	GO:0008276	6	0.885038	0.62042	3	28	1275	7383	FGRRES_01870,FGRRES_09564,FGRRES_01134,	1
GTPase binding	GO:0051020	5	0.885038	0.62042	3	28	1275	7383	FGRRES_04107,FGRRES_01854,FGRRES_02233,	1
transcription cofactor activity	GO:0003712	4	0.886621	0.673324	5	43	1275	7383	FGRRES_09279,FGRRES_10148,FGRRES_10179,FGRRES_06573,FGRRES_01279,	1
RNA polymerase II transcription factor activity, sequence-specific DNA binding	GO:0000981	4	0.887795	0.89086	76	494	1275	7383	FGRRES_13110,FGRRES_17377,FGRRES_00217,FGRRES_02531,FGRRES_03683,FGRRES_16703,FGRRES_16223,FGRRES_15866_M,FGRRES_15730_M,FGRRES_16245,FGRRES_16256,FGRRES_11891,FGRRES_04109,FGRRES_03219,FGRRES_14003_M,FGRRES_16663_M,FGRRES_04655,FGRRES_07921,FGRRES_16137,FGRRES_17662,FGRRES_04170_M,FGRRES_00313,FGRRES_03912,FGRRES_08769,FGRRES_15926,FGRRES_16446_M,FGRRES_15940,FGRRES_12495,FGRRES_16822_M,FGRRES_0…	1
phosphoprotein phosphatase activity	GO:0004721	7	0.890955	0.643399	4	36	1275	7383	FGRRES_06297,FGRRES_06977,FGRRES_11979,FGRRES_04986,	1
phosphatidylinositol binding	GO:0035091	5	0.895701	0.681246	6	51	1275	7383	FGRRES_13137,FGRRES_08485,FGRRES_10272,FGRRES_04308,FGRRES_16007,FGRRES_10187,	1
drug transmembrane transporter activity	GO:0015238	4	0.897392	0.482549	1	12	1275	7383	FGRRES_03080,	1
RNA polymerase I activity	GO:0001054	9	0.897392	0.482549	1	12	1275	7383	FGRRES_00365,	1
RNA polymerase II transcription factor binding	GO:0001085	5	0.897392	0.482549	1	12	1275	7383	FGRRES_07557,	1
endonuclease activity, active with either ribo- or deoxyribonucleic acids and producing 3'-phosphomonoesters	GO:0016894	7	0.897392	0.482549	1	12	1275	7383	FGRRES_03379,	1
drug transporter activity	GO:0090484	3	0.897392	0.482549	1	12	1275	7383	FGRRES_03080,	1
metalloendopeptidase activity	GO:0004222	7	0.899111	0.599026	3	29	1275	7383	FGRRES_02584,FGRRES_15729_M,FGRRES_17472,	1
DNA-directed DNA polymerase activity	GO:0003887	7	0.899853	0.551485	2	21	1275	7383	FGRRES_00621,FGRRES_15847,	1
lipase activity	GO:0016298	5	0.903128	0.62601	4	37	1275	7383	FGRRES_09261,FGRRES_16186,FGRRES_07671,FGRRES_03846,	1
exopeptidase activity	GO:0008238	6	0.904837	0.723824	10	80	1275	7383	FGRRES_02531,FGRRES_11411,FGRRES_01017,FGRRES_01863,FGRRES_03562,FGRRES_10145,FGRRES_06527,FGRRES_03769,FGRRES_04239_M,FGRRES_00017,	1
kinase binding	GO:0019900	5	0.913973	0.526417	2	22	1275	7383	FGRRES_08467,FGRRES_05630_M,	1
DNA polymerase activity	GO:0034061	6	0.913973	0.526417	2	22	1275	7383	FGRRES_00621,FGRRES_15847,	1
heterocyclic compound binding	GO:1901363	3	0.914783	0.952911	417	2534	1275	7383	FGRRES_03603,FGRRES_16912_M,FGRRES_16266,FGRRES_09639,FGRRES_09638,FGRRES_13137,FGRRES_00696,FGRRES_17398,FGRRES_06751,FGRRES_11492,FGRRES_13110,FGRRES_05733,FGRRES_00296,FGRRES_16299,FGRRES_06353,FGRRES_02881_M,FGRRES_00680,FGRRES_02117,FGRRES_02119,FGRRES_09681,FGRRES_09685,FGRRES_09684,FGRRES_00271,FGRRES_10725,FGRRES_02130,FGRRES_04256_M,FGRRES_06274,FGRRES_17372,FGRRES_02111,FGRRES_17377,FGR…	1
transferase activity, transferring sulfur-containing groups	GO:0016782	4	0.91514	0.44543	1	13	1275	7383	FGRRES_00278,	1
oxidoreductase activity, acting on NAD(P)H, quinone or similar compound as acceptor	GO:0016655	5	0.91514	0.44543	1	13	1275	7383	FGRRES_05749,	1
organic cyclic compound binding	GO:0097159	3	0.916506	0.952535	417	2535	1275	7383	FGRRES_03603,FGRRES_16912_M,FGRRES_16266,FGRRES_09639,FGRRES_09638,FGRRES_13137,FGRRES_00696,FGRRES_17398,FGRRES_06751,FGRRES_11492,FGRRES_13110,FGRRES_05733,FGRRES_00296,FGRRES_16299,FGRRES_06353,FGRRES_02881_M,FGRRES_00680,FGRRES_02117,FGRRES_02119,FGRRES_09681,FGRRES_09685,FGRRES_09684,FGRRES_00271,FGRRES_10725,FGRRES_02130,FGRRES_04256_M,FGRRES_06274,FGRRES_17372,FGRRES_02111,FGRRES_17377,FGR…	1
endonuclease activity	GO:0004519	6	0.927486	0.671373	8	69	1275	7383	FGRRES_05738,FGRRES_00799,FGRRES_00348,FGRRES_10291,FGRRES_01699_M,FGRRES_09025,FGRRES_04408,FGRRES_03379,	1
protein-lysine N-methyltransferase activity	GO:0016279	7	0.929821	0.413613	1	14	1275	7383	FGRRES_09564,	1
lysine N-methyltransferase activity	GO:0016278	7	0.929821	0.413613	1	14	1275	7383	FGRRES_09564,	1
RNA methyltransferase activity	GO:0008173	6	0.932482	0.542868	3	32	1275	7383	FGRRES_01870,FGRRES_10175,FGRRES_01254,	1
DNA helicase activity	GO:0003678	9	0.932482	0.542868	3	32	1275	7383	FGRRES_02752,FGRRES_12711,FGRRES_06721,	1
phospholipase activity	GO:0004620	6	0.936785	0.482549	2	24	1275	7383	FGRRES_09261,FGRRES_16186,	1
histone acetyltransferase activity	GO:0004402	10	0.941963	0.386039	1	15	1275	7383	FGRRES_00280_M,	1
threonine-type endopeptidase activity	GO:0004298	7	0.941963	0.386039	1	15	1275	7383	FGRRES_16733,	1
protein phosphatase regulator activity	GO:0019888	5	0.941963	0.386039	1	15	1275	7383	FGRRES_16146,	1
threonine-type peptidase activity	GO:0070003	6	0.941963	0.386039	1	15	1275	7383	FGRRES_16733,	1
Ras guanyl-nucleotide exchange factor activity	GO:0005088	4	0.941963	0.386039	1	15	1275	7383	FGRRES_01267,	1
RNA polymerase II core binding	GO:0000993	6	0.941963	0.386039	1	15	1275	7383	FGRRES_06948,	1
basal transcription machinery binding	GO:0001098	4	0.941963	0.386039	1	15	1275	7383	FGRRES_06948,	1
basal RNA polymerase II transcription machinery binding	GO:0001099	5	0.941963	0.386039	1	15	1275	7383	FGRRES_06948,	1
transcription coactivator activity	GO:0003713	5	0.941963	0.386039	1	15	1275	7383	FGRRES_10179,	1
peptide-lysine-N-acetyltransferase activity	GO:0061733	9	0.941963	0.386039	1	15	1275	7383	FGRRES_00280_M,	1
ligase activity	GO:0016874	3	0.949486	0.783879	31	229	1275	7383	FGRRES_09638,FGRRES_00287,FGRRES_07833,FGRRES_08803,FGRRES_01419,FGRRES_08078,FGRRES_10230,FGRRES_10272,FGRRES_09337,FGRRES_03938,FGRRES_05453_M,FGRRES_09139_40_17163_M,FGRRES_06922,FGRRES_05187_M,FGRRES_10116,FGRRES_16445,FGRRES_03514_M,FGRRES_03363,FGRRES_08687,FGRRES_04333,FGRRES_07075_M,FGRRES_09934,FGRRES_02228,FGRRES_09554,FGRRES_17057,FGRRES_16356,FGRRES_08543,FGRRES_04154_M,FGRRES_08688_M…	1
transcription factor activity, protein binding	GO:0000988	2	0.951071	0.634585	8	73	1275	7383	FGRRES_09279,FGRRES_06948,FGRRES_16007,FGRRES_10148,FGRRES_10179,FGRRES_06573,FGRRES_01279,FGRRES_09982,	1
metallocarboxypeptidase activity	GO:0004181	8	0.952006	0.361912	1	16	1275	7383	FGRRES_00017,	1
amide transmembrane transporter activity	GO:0042887	5	0.952006	0.361912	1	16	1275	7383	FGRRES_03111,	1
phosphatase regulator activity	GO:0019208	4	0.952006	0.361912	1	16	1275	7383	FGRRES_16146,	1
microtubule binding	GO:0008017	6	0.953778	0.44543	2	26	1275	7383	FGRRES_06149,FGRRES_15772,	1
nucleoside-triphosphatase regulator activity	GO:0060589	4	0.953891	0.538659	4	43	1275	7383	FGRRES_04107,FGRRES_09952,FGRRES_01065,FGRRES_09982,	1
ubiquitin-like protein binding	GO:0032182	4	0.955404	0.496336	3	35	1275	7383	FGRRES_10272,FGRRES_16007,FGRRES_08540,	1
ribonucleoprotein complex binding	GO:0043021	4	0.955404	0.496336	3	35	1275	7383	FGRRES_08737,FGRRES_17102,FGRRES_11603,	1
tubulin binding	GO:0015631	5	0.955404	0.496336	3	35	1275	7383	FGRRES_06149,FGRRES_00510,FGRRES_15772,	1
protein complex binding	GO:0032403	4	0.959453	0.526417	4	44	1275	7383	FGRRES_00660,FGRRES_06948,FGRRES_16007,FGRRES_09988,	1
mRNA binding	GO:0003729	6	0.959457	0.556787	5	52	1275	7383	FGRRES_08458,FGRRES_00797,FGRRES_01870,FGRRES_05737_M,FGRRES_09952,	1
lipid transporter activity	GO:0005319	4	0.960313	0.340623	1	17	1275	7383	FGRRES_08595,	1
chitin binding	GO:0008061	4	0.960313	0.340623	1	17	1275	7383	FGRRES_07569,	1
carbohydrate kinase activity	GO:0019200	6	0.960313	0.340623	1	17	1275	7383	FGRRES_01445,	1
phosphatidylinositol phosphate binding	GO:1901981	6	0.961263	0.482549	3	36	1275	7383	FGRRES_08485,FGRRES_04308,FGRRES_16007,	1
actin binding	GO:0003779	5	0.961263	0.482549	3	36	1275	7383	FGRRES_16964_M,FGRRES_07284,FGRRES_01923,	1
enzyme activator activity	GO:0008047	4	0.96209	0.59609	7	68	1275	7383	FGRRES_10728,FGRRES_04107,FGRRES_13550,FGRRES_06024,FGRRES_10053,FGRRES_01065,FGRRES_09982,	1
metallopeptidase activity	GO:0008237	6	0.964001	0.609536	8	76	1275	7383	FGRRES_02584,FGRRES_08003,FGRRES_03481,FGRRES_15729_M,FGRRES_11991,FGRRES_17472,FGRRES_12671,FGRRES_00017,	1
GTP binding	GO:0005525	7	0.965954	0.683928	15	127	1275	7383	FGRRES_16266,FGRRES_06274,FGRRES_03848_M,FGRRES_03595,FGRRES_17665,FGRRES_09778,FGRRES_12073,FGRRES_05187_M,FGRRES_13502_3_M,FGRRES_05908,FGRRES_09959,FGRRES_04068_M,FGRRES_05625,FGRRES_09988,FGRRES_15703,	1
RNA polymerase binding	GO:0070063	5	0.967182	0.321699	1	18	1275	7383	FGRRES_06948,	1
RNA polymerase core enzyme binding	GO:0043175	6	0.967182	0.321699	1	18	1275	7383	FGRRES_06948,	1
ligase activity, forming carbon-sulfur bonds	GO:0016877	4	0.967182	0.321699	1	18	1275	7383	FGRRES_01419,	1
tRNA methyltransferase activity	GO:0008175	7	0.967182	0.321699	1	18	1275	7383	FGRRES_01254,	1
guanyl ribonucleotide binding	GO:0032561	7	0.968694	0.678585	15	128	1275	7383	FGRRES_16266,FGRRES_06274,FGRRES_03848_M,FGRRES_03595,FGRRES_17665,FGRRES_09778,FGRRES_12073,FGRRES_05187_M,FGRRES_13502_3_M,FGRRES_05908,FGRRES_09959,FGRRES_04068_M,FGRRES_05625,FGRRES_09988,FGRRES_15703,	1
guanyl nucleotide binding	GO:0019001	6	0.968694	0.678585	15	128	1275	7383	FGRRES_16266,FGRRES_06274,FGRRES_03848_M,FGRRES_03595,FGRRES_17665,FGRRES_09778,FGRRES_12073,FGRRES_05187_M,FGRRES_13502_3_M,FGRRES_05908,FGRRES_09959,FGRRES_04068_M,FGRRES_05625,FGRRES_09988,FGRRES_15703,	1
ribonuclease activity	GO:0004540	6	0.96876	0.503529	4	46	1275	7383	FGRRES_00348,FGRRES_09025,FGRRES_04408,FGRRES_03379,	1
single-stranded DNA binding	GO:0003697	6	0.970876	0.457152	3	38	1275	7383	FGRRES_01699_M,FGRRES_09520,FGRRES_01157,	1
purine ribonucleoside binding	GO:0032550	6	0.971236	0.673324	15	129	1275	7383	FGRRES_16266,FGRRES_06274,FGRRES_03848_M,FGRRES_03595,FGRRES_17665,FGRRES_09778,FGRRES_12073,FGRRES_05187_M,FGRRES_13502_3_M,FGRRES_05908,FGRRES_09959,FGRRES_04068_M,FGRRES_05625,FGRRES_09988,FGRRES_15703,	1
purine nucleoside binding	GO:0001883	5	0.971236	0.673324	15	129	1275	7383	FGRRES_16266,FGRRES_06274,FGRRES_03848_M,FGRRES_03595,FGRRES_17665,FGRRES_09778,FGRRES_12073,FGRRES_05187_M,FGRRES_13502_3_M,FGRRES_05908,FGRRES_09959,FGRRES_04068_M,FGRRES_05625,FGRRES_09988,FGRRES_15703,	1
protein complex scaffold activity	GO:0032947	3	0.972864	0.304768	1	19	1275	7383	FGRRES_01699_M,	1
S-adenosylmethionine-dependent methyltransferase activity	GO:0008757	6	0.975619	0.562974	7	72	1275	7383	FGRRES_01870,FGRRES_12495,FGRRES_10175,FGRRES_02783,FGRRES_01254,FGRRES_09564,FGRRES_01134,	1
enzyme binding	GO:0019899	4	0.978857	0.57191	8	81	1275	7383	FGRRES_04107,FGRRES_08467,FGRRES_01854,FGRRES_06948,FGRRES_16007,FGRRES_01923,FGRRES_02233,FGRRES_05630_M,	1
electron carrier activity	GO:0009055	2	0.981167	0.423702	3	41	1275	7383	FGRRES_08821,FGRRES_09742,FGRRES_01981,	1
ribonucleoside binding	GO:0032549	5	0.98138	0.6482	15	134	1275	7383	FGRRES_16266,FGRRES_06274,FGRRES_03848_M,FGRRES_03595,FGRRES_17665,FGRRES_09778,FGRRES_12073,FGRRES_05187_M,FGRRES_13502_3_M,FGRRES_05908,FGRRES_09959,FGRRES_04068_M,FGRRES_05625,FGRRES_09988,FGRRES_15703,	1
peptide N-acetyltransferase activity	GO:0034212	8	0.981447	0.275742	1	21	1275	7383	FGRRES_00280_M,	1
kinase regulator activity	GO:0019207	4	0.982361	0.361912	2	32	1275	7383	FGRRES_07557,FGRRES_00941,	1
enzyme regulator activity	GO:0030234	3	0.982969	0.643399	15	135	1275	7383	FGRRES_00660,FGRRES_10728,FGRRES_04107,FGRRES_16146,FGRRES_13550,FGRRES_06024,FGRRES_10967,FGRRES_07557,FGRRES_09952,FGRRES_01052,FGRRES_10053,FGRRES_01065,FGRRES_09982,FGRRES_04997,FGRRES_00941,	1
nucleoside binding	GO:0001882	4	0.982969	0.643399	15	135	1275	7383	FGRRES_16266,FGRRES_06274,FGRRES_03848_M,FGRRES_03595,FGRRES_17665,FGRRES_09778,FGRRES_12073,FGRRES_05187_M,FGRRES_13502_3_M,FGRRES_05908,FGRRES_09959,FGRRES_04068_M,FGRRES_05625,FGRRES_09988,FGRRES_15703,	1
ubiquitin-like protein transferase activity	GO:0019787	4	0.984571	0.533344	7	76	1275	7383	FGRRES_16999_M,FGRRES_09200,FGRRES_09202,FGRRES_10272,FGRRES_06922,FGRRES_10117,FGRRES_07671,	1
GTPase activity	GO:0003924	8	0.984571	0.533344	7	76	1275	7383	FGRRES_17665,FGRRES_09778,FGRRES_05908,FGRRES_04068_M,FGRRES_06692,FGRRES_09988,FGRRES_15703,	1
metalloexopeptidase activity	GO:0008235	7	0.98466	0.263209	1	22	1275	7383	FGRRES_00017,	1
cytoskeletal protein binding	GO:0008092	4	0.986271	0.526417	7	77	1275	7383	FGRRES_16964_M,FGRRES_06149,FGRRES_07284,FGRRES_01923,FGRRES_00510,FGRRES_10048,FGRRES_15772,	1
ubiquitin-protein transferase activity	GO:0004842	5	0.986383	0.503529	6	69	1275	7383	FGRRES_16999_M,FGRRES_09200,FGRRES_09202,FGRRES_10272,FGRRES_06922,FGRRES_07671,	1
ubiquitin binding	GO:0043130	5	0.98729	0.340623	2	34	1275	7383	FGRRES_10272,FGRRES_16007,	1
3'-5' exonuclease activity	GO:0008408	7	0.987317	0.251765	1	23	1275	7383	FGRRES_01699_M,	1
monovalent inorganic cation transmembrane transporter activity	GO:0015077	8	0.989369	0.489345	6	71	1275	7383	FGRRES_04178,FGRRES_01802,FGRRES_10531,FGRRES_16433_M,FGRRES_16803,FGRRES_01606,	1
phosphatidylinositol-3-phosphate binding	GO:0032266	7	0.989514	0.241275	1	24	1275	7383	FGRRES_04308,	1
protein binding, bridging	GO:0030674	4	0.990867	0.321699	2	36	1275	7383	FGRRES_16146,FGRRES_00538,	1
RNA polymerase activity	GO:0097747	6	0.992321	0.369612	3	47	1275	7383	FGRRES_04619,FGRRES_00365,FGRRES_09520,	1
5'-3' RNA polymerase activity	GO:0034062	7	0.992321	0.369612	3	47	1275	7383	FGRRES_04619,FGRRES_00365,FGRRES_09520,	1
transcription factor binding	GO:0008134	4	0.992833	0.222715	1	26	1275	7383	FGRRES_07557,	1
aminoacyl-tRNA ligase activity	GO:0004812	6	0.994342	0.354526	3	49	1275	7383	FGRRES_16445,FGRRES_16356,FGRRES_07447,	1
ligase activity, forming carbon-oxygen bonds	GO:0016875	4	0.994342	0.354526	3	49	1275	7383	FGRRES_16445,FGRRES_16356,FGRRES_07447,	1
ligase activity, forming aminoacyl-tRNA and related compounds	GO:0016876	5	0.994342	0.354526	3	49	1275	7383	FGRRES_16445,FGRRES_16356,FGRRES_07447,	1
binding, bridging	GO:0060090	3	0.994463	0.296953	2	39	1275	7383	FGRRES_16146,FGRRES_00538,	1
macromolecular complex binding	GO:0044877	3	0.994768	0.476872	7	85	1275	7383	FGRRES_00660,FGRRES_06948,FGRRES_08737,FGRRES_16007,FGRRES_17102,FGRRES_11603,FGRRES_09988,	1
protein dimerization activity	GO:0046983	4	0.995043	0.451215	6	77	1275	7383	FGRRES_06262,FGRRES_02814,FGRRES_09339,FGRRES_00365,FGRRES_01307,FGRRES_11658,	1
exonuclease activity	GO:0004527	6	0.995149	0.347435	3	50	1275	7383	FGRRES_03108,FGRRES_01699_M,FGRRES_03762,	1
DNA-directed 5'-3' RNA polymerase activity	GO:0003899	8	0.995319	0.289529	2	40	1275	7383	FGRRES_00365,FGRRES_09520,	1
nuclease activity	GO:0004518	5	0.996162	0.517017	10	112	1275	7383	FGRRES_05738,FGRRES_03108,FGRRES_00799,FGRRES_00348,FGRRES_10291,FGRRES_01699_M,FGRRES_09025,FGRRES_04408,FGRRES_03379,FGRRES_03762,	1
protein kinase regulator activity	GO:0019887	5	0.996653	0.19302	1	30	1275	7383	FGRRES_00941,	1
DNA binding	GO:0003677	5	0.99691	0.797602	100	726	1275	7383	FGRRES_16912_M,FGRRES_00696,FGRRES_00271,FGRRES_17377,FGRRES_00217,FGRRES_17323,FGRRES_02531,FGRRES_03650,FGRRES_16767,FGRRES_15730_M,FGRRES_06307,FGRRES_16256,FGRRES_11891,FGRRES_04109,FGRRES_01488,FGRRES_14003_M,FGRRES_16663_M,FGRRES_00621,FGRRES_02026,FGRRES_06874,FGRRES_15914_M,FGRRES_09339,FGRRES_16964_M,FGRRES_17686,FGRRES_17271,FGRRES_17662,FGRRES_00365,FGRRES_05834_M,FGRRES_04170_M,FGRRES…	1
identical protein binding	GO:0042802	4	0.997208	0.450379	7	90	1275	7383	FGRRES_07949,FGRRES_01177,FGRRES_01923,FGRRES_01052,FGRRES_10048,FGRRES_01134,FGRRES_01157,	1
hydrolase activity, acting on ester bonds	GO:0016788	4	0.997545	0.701395	43	355	1275	7383	FGRRES_05738,FGRRES_09261,FGRRES_06297,FGRRES_17324_M,FGRRES_12043,FGRRES_03108,FGRRES_13619,FGRRES_02890,FGRRES_02848,FGRRES_16175,FGRRES_00799,FGRRES_16964_M,FGRRES_16186,FGRRES_17216,FGRRES_03964,FGRRES_00348,FGRRES_10291,FGRRES_09139_40_17163_M,FGRRES_01699_M,FGRRES_09025,FGRRES_06977,FGRRES_03402,FGRRES_07671,FGRRES_04408,FGRRES_00406,FGRRES_03846,FGRRES_03379,FGRRES_01243,FGRRES_05935,FGRRE…	1
zinc ion binding	GO:0008270	7	0.997952	0.811705	127	906	1275	7383	FGRRES_00297,FGRRES_09622,FGRRES_13110,FGRRES_09261,FGRRES_17372,FGRRES_17377,FGRRES_00249,FGRRES_00217,FGRRES_16723,FGRRES_02531,FGRRES_03683,FGRRES_16703,FGRRES_12935,FGRRES_03650,FGRRES_16223,FGRRES_15866_M,FGRRES_15730_M,FGRRES_16245,FGRRES_11454,FGRRES_16256,FGRRES_11891,FGRRES_04109,FGRRES_03219,FGRRES_16999_M,FGRRES_14003_M,FGRRES_16663_M,FGRRES_04655,FGRRES_07921,FGRRES_09200,FGRRES_09202…	1
molecular function regulator	GO:0098772	2	0.99824	0.558129	16	166	1275	7383	FGRRES_00660,FGRRES_10728,FGRRES_04107,FGRRES_16146,FGRRES_13550,FGRRES_06024,FGRRES_10967,FGRRES_01267,FGRRES_07557,FGRRES_09952,FGRRES_01052,FGRRES_10053,FGRRES_01065,FGRRES_09982,FGRRES_04997,FGRRES_00941,	1
hydrogen ion transmembrane transporter activity	GO:0015078	9	0.998377	0.304768	3	57	1275	7383	FGRRES_01802,FGRRES_16433_M,FGRRES_01606,	1
guanyl-nucleotide exchange factor activity	GO:0005085	3	0.998438	0.170311	1	34	1275	7383	FGRRES_01267,	1
unfolded protein binding	GO:0051082	4	0.999149	0.231624	2	50	1275	7383	FGRRES_10352,FGRRES_00510,	1
translation factor activity, RNA binding	GO:0008135	6	0.999665	0.382397	7	106	1275	7383	FGRRES_06353,FGRRES_06804,FGRRES_04181,FGRRES_04308,FGRRES_08737,FGRRES_17102,FGRRES_08532,	1
protein transporter activity	GO:0008565	5	0.999768	0.131604	1	44	1275	7383	FGRRES_02233,	1
nucleotidyltransferase activity	GO:0016779	5	0.999841	0.340623	6	102	1275	7383	FGRRES_04619,FGRRES_00621,FGRRES_00365,FGRRES_15847,FGRRES_02259,FGRRES_09520,	1
peptide transporter activity	GO:0015197	4	0.999869	0.123204	1	47	1275	7383	FGRRES_02233,	1
translation initiation factor activity	GO:0003743	7	0.999913	0.231624	3	75	1275	7383	FGRRES_06353,FGRRES_06804,FGRRES_04308,	1
protein binding	GO:0005515	3	0.999928	0.793797	173	1262	1275	7383	FGRRES_00297,FGRRES_16275,FGRRES_17398,FGRRES_09622,FGRRES_10352,FGRRES_06353,FGRRES_00660,FGRRES_10728,FGRRES_00270,FGRRES_00271,FGRRES_09279,FGRRES_17372,FGRRES_06262,FGRRES_02552,FGRRES_11032,FGRRES_04574,FGRRES_16724,FGRRES_17306,FGRRES_11019,FGRRES_11829,FGRRES_11410,FGRRES_17709_M,FGRRES_12935,FGRRES_11070,FGRRES_06327,FGRRES_11067,FGRRES_11062,FGRRES_16733,FGRRES_11059,FGRRES_02584,FGRRES_…	1
binding	GO:0005488	2	0.999972	0.917768	711	4486	1275	7383	FGRRES_03603,FGRRES_16912_M,FGRRES_16266,FGRRES_09639,FGRRES_09638,FGRRES_02803,FGRRES_00297,FGRRES_13137,FGRRES_00696,FGRRES_10392,FGRRES_16275,FGRRES_17398,FGRRES_06751,FGRRES_11492,FGRRES_09622,FGRRES_10352,FGRRES_00278,FGRRES_13110,FGRRES_05733,FGRRES_00296,FGRRES_16299,FGRRES_06353,FGRRES_08485,FGRRES_02881_M,FGRRES_00680,FGRRES_09261,FGRRES_02117,FGRRES_00660,FGRRES_02119,FGRRES_09681,FGRRE…	1
chromatin binding	GO:0003682	3	0.999999	0.0815576	1	71	1275	7383	FGRRES_09025,	1
RNA binding	GO:0003723	5	1	0.4591	31	391	1275	7383	FGRRES_06353,FGRRES_17287_M,FGRRES_06804,FGRRES_04181,FGRRES_01010,FGRRES_05687,FGRRES_07326,FGRRES_10795,FGRRES_08458,FGRRES_00398,FGRRES_00797,FGRRES_16145,FGRRES_01870,FGRRES_05737_M,FGRRES_00348,FGRRES_04308,FGRRES_04286,FGRRES_08737,FGRRES_09025,FGRRES_02752,FGRRES_10175,FGRRES_04408,FGRRES_12711,FGRRES_17102,FGRRES_03379,FGRRES_04350,FGRRES_09952,FGRRES_20304,FGRRES_00590,FGRRES_06721,FGRRE…	1
nucleic acid binding	GO:0003676	4	1	0.678055	150	1281	1275	7383	FGRRES_16912_M,FGRRES_00696,FGRRES_06353,FGRRES_09685,FGRRES_00271,FGRRES_17377,FGRRES_00217,FGRRES_17323,FGRRES_17287_M,FGRRES_02531,FGRRES_03650,FGRRES_03108,FGRRES_16767,FGRRES_15730_M,FGRRES_16751,FGRRES_06307,FGRRES_16256,FGRRES_11891,FGRRES_04109,FGRRES_01488,FGRRES_14003_M,FGRRES_16663_M,FGRRES_06804,FGRRES_04181,FGRRES_00621,FGRRES_02026,FGRRES_01010,FGRRES_05687,FGRRES_07326,FGRRES_10795…	1
structural constituent of ribosome	GO:0003735	3	1	0.0402124	1	144	1275	7383	FGRRES_17695,	1
Note: Categories whose corrected p-value<=0.05 were highlighted in yellow

## Sheet: ΔFgGCN5 Biological Process
Table S4 Go enrichment of DEGs of ΔFgSAS3 and ΔFgSAS3 mutants
ΔFgGCN5 Biological Process
GO_Name	GO_ID	GO_Level	P_value	EnrichmentScore	HitsGenesCountsInSelectedSet	HitsGenesCountsInBackground	AllGenesCountsInSelectedSet	AllGenesCountsInBackground	GenesOfSelectedSetInGOterm	corrected p-value(BH method)
rRNA processing	GO:0006364	9	0	2.3503	109	178	1921	7373	FGRRES_10757,FGRRES_00695,FGRRES_06372,FGRRES_06243,FGRRES_06340,FGRRES_06260,FGRRES_17310,FGRRES_06203,FGRRES_01490,FGRRES_05687,FGRRES_05686,FGRRES_08439,FGRRES_06113,FGRRES_05858,FGRRES_08381,FGRRES_06165,FGRRES_06161,FGRRES_17206,FGRRES_01345,FGRRES_06049,FGRRES_00892,FGRRES_00877,FGRRES_05502,FGRRES_16998,FGRRES_04424,FGRRES_16978,FGRRES_04403,FGRRES_04404,FGRRES_01185,FGRRES_04350,FGRRES_07…	0
rRNA metabolic process	GO:0016072	8	0	2.2261	116	200	1921	7373	FGRRES_10757,FGRRES_00695,FGRRES_06372,FGRRES_06243,FGRRES_06340,FGRRES_06260,FGRRES_17310,FGRRES_06203,FGRRES_01490,FGRRES_05687,FGRRES_05686,FGRRES_08439,FGRRES_06113,FGRRES_05858,FGRRES_08381,FGRRES_06165,FGRRES_06161,FGRRES_17206,FGRRES_11782,FGRRES_01345,FGRRES_04291,FGRRES_06049,FGRRES_00892,FGRRES_00877,FGRRES_05502,FGRRES_16998,FGRRES_04424,FGRRES_16978,FGRRES_04403,FGRRES_04404,FGRRES_01…	0
maturation of SSU-rRNA from tricistronic rRNA transcript (SSU-rRNA, 5.8S rRNA, LSU-rRNA)	GO:0000462	11	0	2.8495	49	66	1921	7373	FGRRES_10757,FGRRES_00695,FGRRES_06340,FGRRES_17310,FGRRES_06203,FGRRES_08439,FGRRES_05858,FGRRES_08381,FGRRES_01345,FGRRES_00892,FGRRES_00877,FGRRES_05502,FGRRES_04424,FGRRES_16978,FGRRES_04404,FGRRES_04350,FGRRES_07107,FGRRES_06070,FGRRES_07055,FGRRES_01102,FGRRES_05556,FGRRES_07262_M,FGRRES_00270,FGRRES_07399,FGRRES_06791,FGRRES_06788,FGRRES_02561,FGRRES_06972_M,FGRRES_05229,FGRRES_13623,FGRRE…	0
ribosomal small subunit biogenesis	GO:0042274	5	1.11022e-16	2.53062	60	91	1921	7373	FGRRES_10757,FGRRES_00695,FGRRES_06340,FGRRES_17310,FGRRES_06203,FGRRES_08439,FGRRES_05858,FGRRES_08381,FGRRES_16637,FGRRES_01345,FGRRES_00732,FGRRES_00892,FGRRES_00877,FGRRES_05502,FGRRES_04424,FGRRES_16978,FGRRES_04404,FGRRES_16980_M,FGRRES_04350,FGRRES_07107,FGRRES_06070,FGRRES_09929,FGRRES_07055,FGRRES_01102,FGRRES_05556,FGRRES_06743,FGRRES_07262_M,FGRRES_00270,FGRRES_07399,FGRRES_06791,FGRRE…	9.62286e-14
maturation of 5.8S rRNA from tricistronic rRNA transcript (SSU-rRNA, 5.8S rRNA, LSU-rRNA)	GO:0000466	11	3.20854e-14	2.64883	49	71	1921	7373	FGRRES_10757,FGRRES_00695,FGRRES_06203,FGRRES_06113,FGRRES_01345,FGRRES_06049,FGRRES_00877,FGRRES_05502,FGRRES_04404,FGRRES_07107,FGRRES_05466,FGRRES_06070,FGRRES_07055,FGRRES_01102,FGRRES_01135,FGRRES_05556,FGRRES_05585,FGRRES_00961,FGRRES_07262_M,FGRRES_06791,FGRRES_06788,FGRRES_02561,FGRRES_05229,FGRRES_13623,FGRRES_07379,FGRRES_01175_M,FGRRES_06821,FGRRES_09761,FGRRES_09766,FGRRES_00372,FGRRE…	2.2248e-11
maturation of 5.8S rRNA	GO:0000460	10	3.20854e-14	2.64883	49	71	1921	7373	FGRRES_10757,FGRRES_00695,FGRRES_06203,FGRRES_06113,FGRRES_01345,FGRRES_06049,FGRRES_00877,FGRRES_05502,FGRRES_04404,FGRRES_07107,FGRRES_05466,FGRRES_06070,FGRRES_07055,FGRRES_01102,FGRRES_01135,FGRRES_05556,FGRRES_05585,FGRRES_00961,FGRRES_07262_M,FGRRES_06791,FGRRES_06788,FGRRES_02561,FGRRES_05229,FGRRES_13623,FGRRES_07379,FGRRES_01175_M,FGRRES_06821,FGRRES_09761,FGRRES_09766,FGRRES_00372,FGRRE…	2.2248e-11
endonucleolytic cleavage in ITS1 to separate SSU-rRNA from 5.8S rRNA and LSU-rRNA from tricistronic rRNA transcript (SSU-rRNA, 5.8S rRNA, LSU-rRNA)	GO:0000447	11	5.80647e-14	3.30503	31	36	1921	7373	FGRRES_06203,FGRRES_01345,FGRRES_00877,FGRRES_05502,FGRRES_04404,FGRRES_07107,FGRRES_06070,FGRRES_07055,FGRRES_01102,FGRRES_05556,FGRRES_07262_M,FGRRES_06791,FGRRES_06788,FGRRES_02561,FGRRES_05229,FGRRES_13623,FGRRES_07379,FGRRES_09761,FGRRES_00372,FGRRES_07296,FGRRES_10908,FGRRES_17707_M,FGRRES_00485,FGRRES_00486,FGRRES_00436,FGRRES_16531,FGRRES_17605,FGRRES_10033,FGRRES_00567,FGRRES_13033_M,FGR…	2.87586e-11
maturation of SSU-rRNA	GO:0030490	10	6.66134e-14	2.59331	50	74	1921	7373	FGRRES_10757,FGRRES_00695,FGRRES_06340,FGRRES_17310,FGRRES_06203,FGRRES_08439,FGRRES_05858,FGRRES_08381,FGRRES_01345,FGRRES_00892,FGRRES_00877,FGRRES_05502,FGRRES_04424,FGRRES_16978,FGRRES_04404,FGRRES_04350,FGRRES_07107,FGRRES_06070,FGRRES_07055,FGRRES_01102,FGRRES_05556,FGRRES_07262_M,FGRRES_00270,FGRRES_07399,FGRRES_06791,FGRRES_06788,FGRRES_02561,FGRRES_06972_M,FGRRES_05229,FGRRES_13661,FGRRE…	2.88686e-11
ribosomal large subunit biogenesis	GO:0042273	5	8.90399e-14	2.63184	48	70	1921	7373	FGRRES_10757,FGRRES_00695,FGRRES_06243,FGRRES_05698,FGRRES_06113,FGRRES_06165,FGRRES_06161,FGRRES_16637,FGRRES_01332,FGRRES_07101,FGRRES_04350,FGRRES_07107,FGRRES_04326,FGRRES_05466,FGRRES_06628,FGRRES_06705,FGRRES_01135,FGRRES_01128,FGRRES_05585,FGRRES_00961,FGRRES_00292,FGRRES_02511,FGRRES_06791,FGRRES_02561,FGRRES_08807,FGRRES_01175_M,FGRRES_06821,FGRRES_09740,FGRRES_00398,FGRRES_09729,FGRRES_…	3.43001e-11
ncRNA processing	GO:0034470	8	2.4547e-13	1.77143	126	273	1921	7373	FGRRES_10757,FGRRES_00695,FGRRES_06372,FGRRES_06243,FGRRES_06340,FGRRES_06260,FGRRES_17310,FGRRES_06203,FGRRES_01490,FGRRES_05687,FGRRES_05686,FGRRES_08439,FGRRES_06113,FGRRES_05858,FGRRES_08381,FGRRES_17264,FGRRES_06165,FGRRES_06161,FGRRES_17206,FGRRES_01345,FGRRES_06049,FGRRES_00892,FGRRES_00877,FGRRES_05502,FGRRES_06586,FGRRES_16998,FGRRES_04424,FGRRES_16978,FGRRES_04403,FGRRES_04404,FGRRES_01…	8.51046e-11
endonucleolytic cleavage of tricistronic rRNA transcript (SSU-rRNA, 5.8S rRNA, LSU-rRNA)	GO:0000479	10	3.45723e-13	3.14921	32	39	1921	7373	FGRRES_06203,FGRRES_01345,FGRRES_00877,FGRRES_05502,FGRRES_04404,FGRRES_07107,FGRRES_06070,FGRRES_07055,FGRRES_01102,FGRRES_05556,FGRRES_07262_M,FGRRES_06791,FGRRES_06788,FGRRES_02561,FGRRES_05229,FGRRES_13623,FGRRES_07379,FGRRES_09761,FGRRES_00372,FGRRES_07296,FGRRES_10908,FGRRES_17707_M,FGRRES_00485,FGRRES_00486,FGRRES_00436,FGRRES_16531,FGRRES_17605,FGRRES_02637,FGRRES_10033,FGRRES_00567,FGRRE…	1.08966e-10
endonucleolytic cleavage involved in rRNA processing	GO:0000478	9	1.30052e-12	3.07048	32	40	1921	7373	FGRRES_06203,FGRRES_01345,FGRRES_00877,FGRRES_05502,FGRRES_04404,FGRRES_07107,FGRRES_06070,FGRRES_07055,FGRRES_01102,FGRRES_05556,FGRRES_07262_M,FGRRES_06791,FGRRES_06788,FGRRES_02561,FGRRES_05229,FGRRES_13623,FGRRES_07379,FGRRES_09761,FGRRES_00372,FGRRES_07296,FGRRES_10908,FGRRES_17707_M,FGRRES_00485,FGRRES_00486,FGRRES_00436,FGRRES_16531,FGRRES_17605,FGRRES_02637,FGRRES_10033,FGRRES_00567,FGRRE…	3.75741e-10
RNA 5'-end processing	GO:0000966	8	2.33894e-11	3.21906	26	31	1921	7373	FGRRES_01345,FGRRES_16758_M,FGRRES_00877,FGRRES_04404,FGRRES_06070,FGRRES_07055,FGRRES_01102,FGRRES_05556,FGRRES_07262_M,FGRRES_06791,FGRRES_06788,FGRRES_02561,FGRRES_07379,FGRRES_09761,FGRRES_00372,FGRRES_07296,FGRRES_10908,FGRRES_17707_M,FGRRES_00485,FGRRES_00486,FGRRES_00436,FGRRES_17605,FGRRES_10033,FGRRES_00567,FGRRES_13033_M,FGRRES_04929,	6.23777e-09
maturation of LSU-rRNA	GO:0000470	10	9.38156e-11	3.11846	26	32	1921	7373	FGRRES_10757,FGRRES_00695,FGRRES_06243,FGRRES_06113,FGRRES_04350,FGRRES_05466,FGRRES_01135,FGRRES_05585,FGRRES_00961,FGRRES_02511,FGRRES_02561,FGRRES_01175_M,FGRRES_06821,FGRRES_09740,FGRRES_00398,FGRRES_09766,FGRRES_02478,FGRRES_05336,FGRRES_06962,FGRRES_12040_1_M,FGRRES_02752,FGRRES_11603,FGRRES_02637,FGRRES_10896,FGRRES_07452,FGRRES_05193,	1.71189e-08
endonucleolytic cleavage to generate mature 5'-end of SSU-rRNA from (SSU-rRNA, 5.8S rRNA, LSU-rRNA)	GO:0000472	11	7.6173e-11	3.19842	25	30	1921	7373	FGRRES_01345,FGRRES_00877,FGRRES_04404,FGRRES_06070,FGRRES_07055,FGRRES_01102,FGRRES_05556,FGRRES_07262_M,FGRRES_06791,FGRRES_06788,FGRRES_02561,FGRRES_07379,FGRRES_09761,FGRRES_00372,FGRRES_07296,FGRRES_10908,FGRRES_17707_M,FGRRES_00485,FGRRES_00486,FGRRES_00436,FGRRES_17605,FGRRES_10033,FGRRES_00567,FGRRES_13033_M,FGRRES_04929,	1.88637e-08
maturation of LSU-rRNA from tricistronic rRNA transcript (SSU-rRNA, 5.8S rRNA, LSU-rRNA)	GO:0000463	11	7.6173e-11	3.19842	25	30	1921	7373	FGRRES_10757,FGRRES_00695,FGRRES_06243,FGRRES_06113,FGRRES_04350,FGRRES_05466,FGRRES_01135,FGRRES_05585,FGRRES_00961,FGRRES_02511,FGRRES_02561,FGRRES_01175_M,FGRRES_06821,FGRRES_09740,FGRRES_00398,FGRRES_09766,FGRRES_02478,FGRRES_05336,FGRRES_06962,FGRRES_12040_1_M,FGRRES_02752,FGRRES_11603,FGRRES_02637,FGRRES_07452,FGRRES_05193,	1.88637e-08
endonucleolytic cleavage in 5'-ETS of tricistronic rRNA transcript (SSU-rRNA, 5.8S rRNA, LSU-rRNA)	GO:0000480	11	7.6173e-11	3.19842	25	30	1921	7373	FGRRES_00877,FGRRES_04404,FGRRES_06070,FGRRES_07055,FGRRES_01102,FGRRES_05556,FGRRES_07262_M,FGRRES_06791,FGRRES_06788,FGRRES_02561,FGRRES_13623,FGRRES_07379,FGRRES_09761,FGRRES_00372,FGRRES_07296,FGRRES_10908,FGRRES_17707_M,FGRRES_00485,FGRRES_00486,FGRRES_00436,FGRRES_17605,FGRRES_10033,FGRRES_00567,FGRRES_13033_M,FGRRES_04929,	1.88637e-08
rRNA 5'-end processing	GO:0000967	10	7.6173e-11	3.19842	25	30	1921	7373	FGRRES_01345,FGRRES_00877,FGRRES_04404,FGRRES_06070,FGRRES_07055,FGRRES_01102,FGRRES_05556,FGRRES_07262_M,FGRRES_06791,FGRRES_06788,FGRRES_02561,FGRRES_07379,FGRRES_09761,FGRRES_00372,FGRRES_07296,FGRRES_10908,FGRRES_17707_M,FGRRES_00485,FGRRES_00486,FGRRES_00436,FGRRES_17605,FGRRES_10033,FGRRES_00567,FGRRES_13033_M,FGRRES_04929,	1.88637e-08
ncRNA 5'-end processing	GO:0034471	9	7.6173e-11	3.19842	25	30	1921	7373	FGRRES_01345,FGRRES_00877,FGRRES_04404,FGRRES_06070,FGRRES_07055,FGRRES_01102,FGRRES_05556,FGRRES_07262_M,FGRRES_06791,FGRRES_06788,FGRRES_02561,FGRRES_07379,FGRRES_09761,FGRRES_00372,FGRRES_07296,FGRRES_10908,FGRRES_17707_M,FGRRES_00485,FGRRES_00486,FGRRES_00436,FGRRES_17605,FGRRES_10033,FGRRES_00567,FGRRES_13033_M,FGRRES_04929,	1.88637e-08
ncRNA metabolic process	GO:0034660	7	2.52667e-10	1.56251	149	366	1921	7373	FGRRES_10757,FGRRES_00695,FGRRES_06372,FGRRES_06243,FGRRES_06340,FGRRES_10722,FGRRES_06260,FGRRES_17310,FGRRES_06203,FGRRES_01497,FGRRES_01490,FGRRES_01457,FGRRES_05687,FGRRES_05686,FGRRES_08439,FGRRES_06113,FGRRES_05858,FGRRES_08381,FGRRES_17264,FGRRES_06165,FGRRES_06161,FGRRES_17206,FGRRES_11782,FGRRES_15916,FGRRES_04273,FGRRES_01345,FGRRES_04291,FGRRES_06049,FGRRES_00892,FGRRES_00877,FGRRES_05…	4.37999e-08
cleavage involved in rRNA processing	GO:0000469	8	6.00267e-10	2.472	38	59	1921	7373	FGRRES_06203,FGRRES_01345,FGRRES_06049,FGRRES_00877,FGRRES_05502,FGRRES_04404,FGRRES_07107,FGRRES_06070,FGRRES_07055,FGRRES_01102,FGRRES_05556,FGRRES_07262_M,FGRRES_07399,FGRRES_06791,FGRRES_06788,FGRRES_02561,FGRRES_05229,FGRRES_13623,FGRRES_10304,FGRRES_07379,FGRRES_09761,FGRRES_00372,FGRRES_07296,FGRRES_10908,FGRRES_17707_M,FGRRES_00485,FGRRES_00486,FGRRES_09037_M,FGRRES_00436,FGRRES_16531,FGR…	9.91013e-08
RNA phosphodiester bond hydrolysis, endonucleolytic	GO:0090502	8	3.7024e-09	2.22206	44	76	1921	7373	FGRRES_06203,FGRRES_01490,FGRRES_17206,FGRRES_01345,FGRRES_05775,FGRRES_09025,FGRRES_09813,FGRRES_00877,FGRRES_05502,FGRRES_16998,FGRRES_04404,FGRRES_04408,FGRRES_01968,FGRRES_03379,FGRRES_07107,FGRRES_06070,FGRRES_07055,FGRRES_01102,FGRRES_05556,FGRRES_07262_M,FGRRES_06791,FGRRES_06788,FGRRES_02561,FGRRES_05229,FGRRES_13623,FGRRES_07379,FGRRES_09761,FGRRES_00372,FGRRES_07296,FGRRES_00348,FGRRES_…	5.83464e-07
ribosome biogenesis	GO:0042254	5	1.14377e-08	1.4983	146	374	1921	7373	FGRRES_10757,FGRRES_00695,FGRRES_06372,FGRRES_06243,FGRRES_06340,FGRRES_06260,FGRRES_17310,FGRRES_06203,FGRRES_01490,FGRRES_02025,FGRRES_05698,FGRRES_05687,FGRRES_05686,FGRRES_08439,FGRRES_06113,FGRRES_05858,FGRRES_08381,FGRRES_06165,FGRRES_06161,FGRRES_17206,FGRRES_07952_M,FGRRES_16637,FGRRES_01386,FGRRES_01332,FGRRES_01345,FGRRES_00732,FGRRES_06049,FGRRES_00892,FGRRES_00877,FGRRES_05502,FGRRES_…	1.72411e-06
RNA processing	GO:0006396	7	2.14588e-07	1.41591	159	431	1921	7373	FGRRES_10757,FGRRES_00695,FGRRES_06372,FGRRES_06243,FGRRES_06340,FGRRES_06260,FGRRES_17310,FGRRES_06203,FGRRES_16766,FGRRES_11865,FGRRES_16693,FGRRES_01490,FGRRES_05687,FGRRES_05686,FGRRES_10795,FGRRES_08439,FGRRES_06113,FGRRES_05858,FGRRES_05857,FGRRES_00794,FGRRES_08381,FGRRES_17264,FGRRES_06165,FGRRES_06161,FGRRES_05737_M,FGRRES_17206,FGRRES_01299,FGRRES_16644,FGRRES_15928,FGRRES_01345,FGRRES_…	3.09991e-05
ribonucleoprotein complex biogenesis	GO:0022613	4	3.48391e-06	1.3581	161	455	1921	7373	FGRRES_10757,FGRRES_00695,FGRRES_06372,FGRRES_06243,FGRRES_06340,FGRRES_06260,FGRRES_17310,FGRRES_06203,FGRRES_16766,FGRRES_01490,FGRRES_02025,FGRRES_05698,FGRRES_05687,FGRRES_05686,FGRRES_08439,FGRRES_06113,FGRRES_05858,FGRRES_08381,FGRRES_06165,FGRRES_06161,FGRRES_05737_M,FGRRES_17206,FGRRES_07952_M,FGRRES_01299,FGRRES_16637,FGRRES_01386,FGRRES_01332,FGRRES_01343,FGRRES_01345,FGRRES_04286,FGRRE…	0.000483149
RNA phosphodiester bond hydrolysis	GO:0090501	7	1.11507e-05	1.70582	52	117	1921	7373	FGRRES_06203,FGRRES_11865,FGRRES_01490,FGRRES_10795,FGRRES_17206,FGRRES_01345,FGRRES_05775,FGRRES_09025,FGRRES_06049,FGRRES_09813,FGRRES_00877,FGRRES_05502,FGRRES_16998,FGRRES_04404,FGRRES_04408,FGRRES_01968,FGRRES_03379,FGRRES_07107,FGRRES_06070,FGRRES_15738_M,FGRRES_07055,FGRRES_01102,FGRRES_05556,FGRRES_07262_M,FGRRES_07399,FGRRES_06791,FGRRES_06788,FGRRES_02561,FGRRES_05229,FGRRES_13623,FGRRE…	0.00148691
ribosome assembly	GO:0042255	8	4.14336e-05	2.15308	23	41	1921	7373	FGRRES_05698,FGRRES_01332,FGRRES_04326,FGRRES_05466,FGRRES_06628,FGRRES_06705,FGRRES_05585,FGRRES_00961,FGRRES_06743,FGRRES_01175_M,FGRRES_09740,FGRRES_10246,FGRRES_10262,FGRRES_06894,FGRRES_09761,FGRRES_09766,FGRRES_09795,FGRRES_06962,FGRRES_02752,FGRRES_17605,FGRRES_09544,FGRRES_02637,FGRRES_10896,	0.00532039
organic hydroxy compound biosynthetic process	GO:1901617	5	0.000155551	1.78391	33	71	1921	7373	FGRRES_03603,FGRRES_06215,FGRRES_17247,FGRRES_08399_M,FGRRES_09321,FGRRES_06606,FGRRES_01053,FGRRES_09830_M,FGRRES_16878,FGRRES_03309,FGRRES_09197,FGRRES_09503_M,FGRRES_00926,FGRRES_06735_M,FGRRES_00298,FGRRES_01759,FGRRES_02584,FGRRES_07315,FGRRES_00399,FGRRES_10272,FGRRES_03014,FGRRES_02758,FGRRES_02783,FGRRES_16532,FGRRES_08689,FGRRES_05912,FGRRES_05035,FGRRES_05036,FGRRES_05079,FGRRES_11500,F…	0.0192606
cellular amino acid metabolic process	GO:0006520	7	0.000270413	1.27378	152	458	1921	7373	FGRRES_06370,FGRRES_08498,FGRRES_05739,FGRRES_05733,FGRRES_02881_M,FGRRES_06297,FGRRES_10722,FGRRES_09257,FGRRES_06282,FGRRES_17341,FGRRES_03668,FGRRES_06206,FGRRES_16693,FGRRES_01497,FGRRES_01486,FGRRES_04117,FGRRES_04196,FGRRES_08426,FGRRES_05696,FGRRES_08458,FGRRES_05845,FGRRES_02001,FGRRES_03546,FGRRES_17214,FGRRES_01962_M,FGRRES_13318_M,FGRRES_06420,FGRRES_16633,FGRRES_04309,FGRRES_06449,FGR…	0.0312508
ribosomal large subunit assembly	GO:0000027	8	0.000265055	2.27443	16	27	1921	7373	FGRRES_05698,FGRRES_01332,FGRRES_04326,FGRRES_05466,FGRRES_06628,FGRRES_06705,FGRRES_05585,FGRRES_00961,FGRRES_01175_M,FGRRES_09740,FGRRES_10246,FGRRES_09766,FGRRES_02752,FGRRES_09544,FGRRES_02637,FGRRES_10896,	0.0316878
metal ion transport	GO:0030001	7	0.000324137	1.54129	51	127	1921	7373	FGRRES_05749,FGRRES_07832,FGRRES_03693,FGRRES_11029,FGRRES_06685_M,FGRRES_04178,FGRRES_08466,FGRRES_02820,FGRRES_00768,FGRRES_01364,FGRRES_01341,FGRRES_00880,FGRRES_17162,FGRRES_08264,FGRRES_16995,FGRRES_01196,FGRRES_16064,FGRRES_17102,FGRRES_08188_M,FGRRES_01230,FGRRES_01265,FGRRES_16125_M,FGRRES_16803,FGRRES_13493,FGRRES_02143,FGRRES_09681,FGRRES_09673,FGRRES_02513,FGRRES_02589,FGRRES_16143,FGR…	0.0362511
alpha-amino acid metabolic process	GO:1901605	8	0.000380707	1.27937	140	420	1921	7373	FGRRES_06370,FGRRES_08498,FGRRES_05739,FGRRES_05733,FGRRES_02881_M,FGRRES_06297,FGRRES_10722,FGRRES_06282,FGRRES_17341,FGRRES_03668,FGRRES_06206,FGRRES_16693,FGRRES_01486,FGRRES_04117,FGRRES_04196,FGRRES_08426,FGRRES_05696,FGRRES_08458,FGRRES_05845,FGRRES_02001,FGRRES_03546,FGRRES_17214,FGRRES_01962_M,FGRRES_13318_M,FGRRES_06420,FGRRES_16633,FGRRES_04309,FGRRES_06449,FGRRES_01395,FGRRES_16594,FGR…	0.0412473
assembly of large subunit precursor of preribosome	GO:1902626	8	0.000499726	3.35834	7	8	1921	7373	FGRRES_06243,FGRRES_06165,FGRRES_01175_M,FGRRES_09766,FGRRES_06962,FGRRES_06724_M,FGRRES_10896,	0.0525015
carboxylic acid metabolic process	GO:0019752	6	0.000665279	1.20862	205	651	1921	7373	FGRRES_13137,FGRRES_06240,FGRRES_06370,FGRRES_08498,FGRRES_13110,FGRRES_05739,FGRRES_05733,FGRRES_02881_M,FGRRES_06297,FGRRES_10722,FGRRES_09257,FGRRES_06282,FGRRES_09281,FGRRES_06127_M,FGRRES_17341,FGRRES_03668,FGRRES_06206,FGRRES_16693,FGRRES_01497,FGRRES_01486,FGRRES_01485,FGRRES_04117,FGRRES_04196,FGRRES_08426,FGRRES_01419,FGRRES_05696,FGRRES_08458,FGRRES_05843,FGRRES_05845,FGRRES_09341,FGRRE…	0.0659006
organic acid metabolic process	GO:0006082	4	0.000688696	1.20479	210	669	1921	7373	FGRRES_13137,FGRRES_06240,FGRRES_06370,FGRRES_08498,FGRRES_13110,FGRRES_05739,FGRRES_05733,FGRRES_02881_M,FGRRES_06297,FGRRES_10722,FGRRES_09257,FGRRES_06282,FGRRES_09281,FGRRES_06127_M,FGRRES_17341,FGRRES_03668,FGRRES_06206,FGRRES_16693,FGRRES_01497,FGRRES_01486,FGRRES_01485,FGRRES_04117,FGRRES_04196,FGRRES_08426,FGRRES_08402,FGRRES_01419,FGRRES_05696,FGRRES_08458,FGRRES_05843,FGRRES_05845,FGRRE…	0.0663252
oxoacid metabolic process	GO:0043436	5	0.000660393	1.20626	209	665	1921	7373	FGRRES_13137,FGRRES_06240,FGRRES_06370,FGRRES_08498,FGRRES_13110,FGRRES_05739,FGRRES_05733,FGRRES_02881_M,FGRRES_06297,FGRRES_10722,FGRRES_09257,FGRRES_06282,FGRRES_09281,FGRRES_06127_M,FGRRES_17341,FGRRES_03668,FGRRES_06206,FGRRES_16693,FGRRES_01497,FGRRES_01486,FGRRES_01485,FGRRES_04117,FGRRES_04196,FGRRES_08426,FGRRES_08402,FGRRES_01419,FGRRES_05696,FGRRES_08458,FGRRES_05843,FGRRES_05845,FGRRE…	0.0673407
organic acid biosynthetic process	GO:0016053	5	0.000719319	1.34334	91	260	1921	7373	FGRRES_08498,FGRRES_05733,FGRRES_10722,FGRRES_06282,FGRRES_17341,FGRRES_01486,FGRRES_08426,FGRRES_05696,FGRRES_08458,FGRRES_09339,FGRRES_03546,FGRRES_17214,FGRRES_01962_M,FGRRES_01395,FGRRES_16594,FGRRES_01346,FGRRES_04287,FGRRES_13963,FGRRES_09321,FGRRES_08338,FGRRES_16007,FGRRES_09035,FGRRES_06544,FGRRES_01177,FGRRES_08761_M,FGRRES_01217,FGRRES_01285,FGRRES_13282,FGRRES_00865,FGRRES_07075_M,FGR…	0.0674021
carboxylic acid biosynthetic process	GO:0046394	6	0.000719319	1.34334	91	260	1921	7373	FGRRES_08498,FGRRES_05733,FGRRES_10722,FGRRES_06282,FGRRES_17341,FGRRES_01486,FGRRES_08426,FGRRES_05696,FGRRES_08458,FGRRES_09339,FGRRES_03546,FGRRES_17214,FGRRES_01962_M,FGRRES_01395,FGRRES_16594,FGRRES_01346,FGRRES_04287,FGRRES_13963,FGRRES_09321,FGRRES_08338,FGRRES_16007,FGRRES_09035,FGRRES_06544,FGRRES_01177,FGRRES_08761_M,FGRRES_01217,FGRRES_01285,FGRRES_13282,FGRRES_00865,FGRRES_07075_M,FGR…	0.0674021
small molecule biosynthetic process	GO:0044283	5	0.00114639	1.26013	131	399	1921	7373	FGRRES_03603,FGRRES_05749,FGRRES_08498,FGRRES_05733,FGRRES_06215,FGRRES_10722,FGRRES_06282,FGRRES_17341,FGRRES_03668,FGRRES_01486,FGRRES_01485,FGRRES_08426,FGRRES_05696,FGRRES_08458,FGRRES_05843,FGRRES_09339,FGRRES_17247,FGRRES_03546,FGRRES_17214,FGRRES_01962_M,FGRRES_08399_M,FGRRES_01395,FGRRES_08061_M,FGRRES_16594,FGRRES_01346,FGRRES_04287,FGRRES_13963,FGRRES_09321,FGRRES_08338,FGRRES_16007,FGR…	0.101911
lipid biosynthetic process	GO:0008610	5	0.00133778	1.37778	70	195	1921	7373	FGRRES_03603,FGRRES_06375,FGRRES_06370,FGRRES_00688,FGRRES_06215,FGRRES_16739,FGRRES_04102,FGRRES_03066_M,FGRRES_20078,FGRRES_16340_M,FGRRES_05826,FGRRES_02001,FGRRES_03546,FGRRES_03537,FGRRES_04237,FGRRES_01349,FGRRES_13963,FGRRES_09321,FGRRES_16007,FGRRES_07154,FGRRES_06606,FGRRES_12746,FGRRES_01243,FGRRES_00866,FGRRES_07075_M,FGRRES_09830_M,FGRRES_06688,FGRRES_09197,FGRRES_09982,FGRRES_09503_M…	0.115952
divalent metal ion transport	GO:0070838	8	0.00144756	1.87225	20	41	1921	7373	FGRRES_07832,FGRRES_06685_M,FGRRES_04178,FGRRES_01364,FGRRES_16995,FGRRES_01196,FGRRES_01265,FGRRES_09681,FGRRES_09673,FGRRES_02513,FGRRES_02589,FGRRES_00371,FGRRES_02400,FGRRES_16483,FGRRES_05974,FGRRES_01606,FGRRES_09515,FGRRES_07418,FGRRES_08931,FGRRES_09591,	0.122407
divalent inorganic cation transport	GO:0072511	7	0.00144756	1.87225	20	41	1921	7373	FGRRES_07832,FGRRES_06685_M,FGRRES_04178,FGRRES_01364,FGRRES_16995,FGRRES_01196,FGRRES_01265,FGRRES_09681,FGRRES_09673,FGRRES_02513,FGRRES_02589,FGRRES_00371,FGRRES_02400,FGRRES_16483,FGRRES_05974,FGRRES_01606,FGRRES_09515,FGRRES_07418,FGRRES_08931,FGRRES_09591,	0.122407
vitamin B6 metabolic process	GO:0042816	7	0.00158228	2.79135	8	11	1921	7373	FGRRES_17247,FGRRES_01053,FGRRES_05221,FGRRES_04686,FGRRES_08689,FGRRES_05035,FGRRES_05036,FGRRES_11500,	0.127576
pyridoxal phosphate metabolic process	GO:0042822	5	0.00169205	3.2898	6	7	1921	7373	FGRRES_17247,FGRRES_01053,FGRRES_08689,FGRRES_05035,FGRRES_05036,FGRRES_11500,	0.133326
pyridoxal phosphate biosynthetic process	GO:0042823	7	0.00169205	3.2898	6	7	1921	7373	FGRRES_17247,FGRRES_01053,FGRRES_08689,FGRRES_05035,FGRRES_05036,FGRRES_11500,	0.133326
aldehyde biosynthetic process	GO:0046184	5	0.00169205	3.2898	6	7	1921	7373	FGRRES_17247,FGRRES_01053,FGRRES_08689,FGRRES_05035,FGRRES_05036,FGRRES_11500,	0.133326
oxidation-reduction process	GO:0055114	4	0.00207636	1.12532	375	1279	1921	7373	FGRRES_03603,FGRRES_05749,FGRRES_13137,FGRRES_06240,FGRRES_08498,FGRRES_13110,FGRRES_05733,FGRRES_06215,FGRRES_02881_M,FGRRES_02118,FGRRES_09281,FGRRES_07180_M,FGRRES_17383,FGRRES_07838,FGRRES_09279,FGRRES_07842,FGRRES_06127_M,FGRRES_11032,FGRRES_11022,FGRRES_17341,FGRRES_17337,FGRRES_03655,FGRRES_04130,FGRRES_04117,FGRRES_03593,FGRRES_08425,FGRRES_04196,FGRRES_08435,FGRRES_02892,FGRRES_02882,FGR…	0.153164
monocarboxylic acid metabolic process	GO:0032787	7	0.00259308	1.32466	78	226	1921	7373	FGRRES_06240,FGRRES_13110,FGRRES_05739,FGRRES_09257,FGRRES_06282,FGRRES_09281,FGRRES_06127_M,FGRRES_01485,FGRRES_04196,FGRRES_01419,FGRRES_05843,FGRRES_09341,FGRRES_09339,FGRRES_03546,FGRRES_08399_M,FGRRES_01395,FGRRES_01346,FGRRES_13956,FGRRES_13957,FGRRES_13963,FGRRES_09321,FGRRES_16919,FGRRES_16007,FGRRES_09035,FGRRES_09896,FGRRES_01981,FGRRES_07191,FGRRES_13282,FGRRES_15842,FGRRES_07075_M,FGR…	0.187296
metal ion homeostasis	GO:0055065	8	0.00268726	1.6449	27	63	1921	7373	FGRRES_00654,FGRRES_00646,FGRRES_07832,FGRRES_11029,FGRRES_06685_M,FGRRES_01438,FGRRES_17670_M,FGRRES_01364,FGRRES_01341,FGRRES_01317,FGRRES_09833,FGRRES_01230,FGRRES_00852,FGRRES_16803,FGRRES_09681,FGRRES_00371,FGRRES_02400,FGRRES_08873_M,FGRRES_05974,FGRRES_16768_M,FGRRES_10049,FGRRES_10854,FGRRES_10887,FGRRES_15855_M,FGRRES_04095,FGRRES_07418,FGRRES_05147,	0.190137
single-organism metabolic process	GO:0044710	3	0.00304619	1.07684	693	2470	1921	7373	FGRRES_03603,FGRRES_05749,FGRRES_07890,FGRRES_07896,FGRRES_13137,FGRRES_06375,FGRRES_06240,FGRRES_06370,FGRRES_00688,FGRRES_08498,FGRRES_13110,FGRRES_05739,FGRRES_05733,FGRRES_06215,FGRRES_02881_M,FGRRES_09261,FGRRES_02118,FGRRES_06297,FGRRES_10722,FGRRES_10725,FGRRES_09257,FGRRES_06282,FGRRES_09281,FGRRES_07180_M,FGRRES_17383,FGRRES_07838,FGRRES_09279,FGRRES_07842,FGRRES_03392_M,FGRRES_06127_M,F…	0.211222
transcription from RNA polymerase I promoter	GO:0006360	8	0.00312491	1.75218	21	46	1921	7373	FGRRES_17310,FGRRES_04308,FGRRES_11782,FGRRES_04273,FGRRES_04291,FGRRES_00892,FGRRES_04424,FGRRES_06683,FGRRES_07086,FGRRES_04470,FGRRES_05550,FGRRES_00297,FGRRES_16299,FGRRES_07262_M,FGRRES_00270,FGRRES_01870,FGRRES_00365,FGRRES_06937,FGRRES_06948,FGRRES_16512,FGRRES_07423,	0.212432
cellular metal ion homeostasis	GO:0006875	9	0.00350052	1.63591	26	61	1921	7373	FGRRES_00654,FGRRES_00646,FGRRES_07832,FGRRES_11029,FGRRES_06685_M,FGRRES_01438,FGRRES_17670_M,FGRRES_01364,FGRRES_01341,FGRRES_01317,FGRRES_09833,FGRRES_01230,FGRRES_00852,FGRRES_16803,FGRRES_09681,FGRRES_00371,FGRRES_02400,FGRRES_08873_M,FGRRES_05974,FGRRES_16768_M,FGRRES_10049,FGRRES_10854,FGRRES_10887,FGRRES_15855_M,FGRRES_04095,FGRRES_07418,	0.233391
amino sugar metabolic process	GO:0006040	5	0.00385223	1.44771	43	114	1921	7373	FGRRES_03603,FGRRES_13110,FGRRES_07838,FGRRES_03593,FGRRES_17617_M,FGRRES_08398,FGRRES_10609,FGRRES_04230,FGRRES_08399_M,FGRRES_01341,FGRRES_02354,FGRRES_02321,FGRRES_07692,FGRRES_01199,FGRRES_16027,FGRRES_16026,FGRRES_01964,FGRRES_01283,FGRRES_15828,FGRRES_10426,FGRRES_17044,FGRRES_16878,FGRRES_03309,FGRRES_00926,FGRRES_00003,FGRRES_07808,FGRRES_10327,FGRRES_03137,FGRRES_11399,FGRRES_03972,FGRRE…	0.251994
C4-dicarboxylate transport	GO:0015740	10	0.00449313	2.68667	7	10	1921	7373	FGRRES_06566,FGRRES_07131,FGRRES_02281,FGRRES_01785,FGRRES_10288,FGRRES_16461,FGRRES_10454_M,	0.273292
triglyceride biosynthetic process	GO:0019432	9	0.00459757	3.83811	4	4	1921	7373	FGRRES_06375,FGRRES_01349,FGRRES_00866,FGRRES_06688,	0.274824
steroid biosynthetic process	GO:0006694	6	0.00439767	1.68877	22	50	1921	7373	FGRRES_03603,FGRRES_06215,FGRRES_03066_M,FGRRES_09321,FGRRES_06606,FGRRES_12746,FGRRES_09830_M,FGRRES_09197,FGRRES_09503_M,FGRRES_00926,FGRRES_01759,FGRRES_02584,FGRRES_07315,FGRRES_10272,FGRRES_09722,FGRRES_17725,FGRRES_02758,FGRRES_02783,FGRRES_13888,FGRRES_16532,FGRRES_05912,FGRRES_07450,	0.277213
alcohol biosynthetic process	GO:0046165	6	0.00447838	1.66559	23	53	1921	7373	FGRRES_03603,FGRRES_06215,FGRRES_08399_M,FGRRES_09321,FGRRES_09830_M,FGRRES_16878,FGRRES_03309,FGRRES_09197,FGRRES_00926,FGRRES_06735_M,FGRRES_00298,FGRRES_02584,FGRRES_07315,FGRRES_00399,FGRRES_10272,FGRRES_03014,FGRRES_02758,FGRRES_02783,FGRRES_05912,FGRRES_05079,FGRRES_04998,FGRRES_00500,FGRRES_07450,	0.27726
glutamine family amino acid metabolic process	GO:0009064	9	0.00434477	1.54521	31	77	1921	7373	FGRRES_05733,FGRRES_17341,FGRRES_04117,FGRRES_08426,FGRRES_08458,FGRRES_01962_M,FGRRES_07897_M,FGRRES_16921,FGRRES_09035,FGRRES_01217,FGRRES_09984,FGRRES_01141,FGRRES_17089,FGRRES_09638,FGRRES_01759,FGRRES_13617,FGRRES_01032,FGRRES_12518,FGRRES_05249,FGRRES_10264,FGRRES_03917,FGRRES_10967,FGRRES_11697,FGRRES_01572,FGRRES_01573,FGRRES_05903,FGRRES_05036,FGRRES_09554,FGRRES_04998,FGRRES_09580,FGRRE…	0.278951
aspartate family amino acid metabolic process	GO:0009066	9	0.00497739	1.39062	50	138	1921	7373	FGRRES_06370,FGRRES_08498,FGRRES_03668,FGRRES_08458,FGRRES_02001,FGRRES_03546,FGRRES_17214,FGRRES_01962_M,FGRRES_04309,FGRRES_16594,FGRRES_15916,FGRRES_13963,FGRRES_09321,FGRRES_08352,FGRRES_06536,FGRRES_06544,FGRRES_01177,FGRRES_03456,FGRRES_08761_M,FGRRES_01285,FGRRES_07075_M,FGRRES_17089,FGRRES_00979,FGRRES_09638,FGRRES_01759,FGRRES_06751,FGRRES_00296,FGRRES_04256_M,FGRRES_13617,FGRRES_05221,F…	0.292485
vitamin B6 biosynthetic process	GO:0042819	8	0.00526904	2.87858	6	8	1921	7373	FGRRES_17247,FGRRES_01053,FGRRES_08689,FGRRES_05035,FGRRES_05036,FGRRES_11500,	0.304463
response to hydrogen peroxide	GO:0042542	6	0.00526904	2.87858	6	8	1921	7373	FGRRES_17264,FGRRES_01279,FGRRES_09991,FGRRES_08800,FGRRES_10144,FGRRES_05183,	0.304463
snRNA modification	GO:0040031	8	0.00562108	3.19842	5	6	1921	7373	FGRRES_06372,FGRRES_06586,FGRRES_10304,FGRRES_07206,FGRRES_09036_M,	0.314327
magnesium ion transport	GO:0015693	9	0.00562108	3.19842	5	6	1921	7373	FGRRES_16995,FGRRES_09673,FGRRES_02513,FGRRES_00371,FGRRES_16483,	0.314327
snRNA pseudouridine synthesis	GO:0031120	9	0.00562108	3.19842	5	6	1921	7373	FGRRES_06372,FGRRES_06586,FGRRES_10304,FGRRES_07206,FGRRES_09036_M,	0.314327
aspartate family amino acid catabolic process	GO:0009068	10	0.00613906	1.85715	15	31	1921	7373	FGRRES_03546,FGRRES_04309,FGRRES_16594,FGRRES_13963,FGRRES_09321,FGRRES_06536,FGRRES_01285,FGRRES_00979,FGRRES_01759,FGRRES_00296,FGRRES_04256_M,FGRRES_06813,FGRRES_05623_M,FGRRES_10925,FGRRES_12330,	0.327448
sterol biosynthetic process	GO:0016126	7	0.00613906	1.85715	15	31	1921	7373	FGRRES_03603,FGRRES_06215,FGRRES_09321,FGRRES_06606,FGRRES_09830_M,FGRRES_09197,FGRRES_00926,FGRRES_02584,FGRRES_07315,FGRRES_10272,FGRRES_02758,FGRRES_02783,FGRRES_16532,FGRRES_05912,FGRRES_07450,	0.327448
cellular amino acid biosynthetic process	GO:0008652	8	0.00676454	1.34216	57	163	1921	7373	FGRRES_08498,FGRRES_05733,FGRRES_10722,FGRRES_06282,FGRRES_17341,FGRRES_01486,FGRRES_08426,FGRRES_05696,FGRRES_08458,FGRRES_17214,FGRRES_01962_M,FGRRES_16594,FGRRES_01346,FGRRES_04287,FGRRES_08338,FGRRES_06544,FGRRES_01177,FGRRES_08761_M,FGRRES_01217,FGRRES_01285,FGRRES_00865,FGRRES_05455,FGRRES_08179,FGRRES_06675,FGRRES_09984,FGRRES_01141,FGRRES_00903,FGRRES_00049,FGRRES_00296,FGRRES_04256_M,FGR…	0.35004
alpha-amino acid catabolic process	GO:1901606	9	0.00694062	1.51504	30	76	1921	7373	FGRRES_05739,FGRRES_04117,FGRRES_03546,FGRRES_04309,FGRRES_01395,FGRRES_16594,FGRRES_13956,FGRRES_13957,FGRRES_13963,FGRRES_09321,FGRRES_08352,FGRRES_08351,FGRRES_02347,FGRRES_06536,FGRRES_01285,FGRRES_01141,FGRRES_09503_M,FGRRES_00049,FGRRES_00979,FGRRES_01759,FGRRES_00296,FGRRES_04256_M,FGRRES_06813,FGRRES_03933,FGRRES_05623_M,FGRRES_10925,FGRRES_10967,FGRRES_01572,FGRRES_05903,FGRRES_12330,	0.353869
glycine metabolic process	GO:0006544	10	0.00759433	1.66874	20	46	1921	7373	FGRRES_06370,FGRRES_08498,FGRRES_03668,FGRRES_02001,FGRRES_08352,FGRRES_08350,FGRRES_08351,FGRRES_06544,FGRRES_01177,FGRRES_09873,FGRRES_17089,FGRRES_00296,FGRRES_13617,FGRRES_05221,FGRRES_10211,FGRRES_17643,FGRRES_05623_M,FGRRES_10119,FGRRES_10893_M,FGRRES_08529,	0.370839
branched-chain amino acid biosynthetic process	GO:0009082	9	0.00748798	1.91905	13	26	1921	7373	FGRRES_08498,FGRRES_10722,FGRRES_06282,FGRRES_05696,FGRRES_05455,FGRRES_08179,FGRRES_06675,FGRRES_00049,FGRRES_00296,FGRRES_04570,FGRRES_02717_M,FGRRES_10118,FGRRES_09512,	0.376244
lysine catabolic process	GO:0006554	11	0.00748798	1.91905	13	26	1921	7373	FGRRES_03546,FGRRES_04309,FGRRES_16594,FGRRES_13963,FGRRES_09321,FGRRES_06536,FGRRES_01285,FGRRES_00979,FGRRES_01759,FGRRES_04256_M,FGRRES_06813,FGRRES_10925,FGRRES_12330,	0.376244
secondary alcohol metabolic process	GO:1902652	6	0.00822938	1.85288	14	29	1921	7373	FGRRES_03603,FGRRES_06215,FGRRES_09321,FGRRES_09830_M,FGRRES_03309,FGRRES_09197,FGRRES_00926,FGRRES_02584,FGRRES_07315,FGRRES_10272,FGRRES_02758,FGRRES_02783,FGRRES_05912,FGRRES_07450,	0.390839
secondary alcohol biosynthetic process	GO:1902653	7	0.00822938	1.85288	14	29	1921	7373	FGRRES_03603,FGRRES_06215,FGRRES_09321,FGRRES_09830_M,FGRRES_03309,FGRRES_09197,FGRRES_00926,FGRRES_02584,FGRRES_07315,FGRRES_10272,FGRRES_02758,FGRRES_02783,FGRRES_05912,FGRRES_07450,	0.390839
cation transport	GO:0006812	6	0.00817046	1.2688	80	242	1921	7373	FGRRES_05749,FGRRES_05723,FGRRES_07832,FGRRES_03693,FGRRES_11029,FGRRES_09297,FGRRES_06685_M,FGRRES_04178,FGRRES_08466,FGRRES_02820,FGRRES_17670_M,FGRRES_00768,FGRRES_05839,FGRRES_04204,FGRRES_01364,FGRRES_01341,FGRRES_15904,FGRRES_09020,FGRRES_00880,FGRRES_17162,FGRRES_08264,FGRRES_10531,FGRRES_16995,FGRRES_01196,FGRRES_16064,FGRRES_01994,FGRRES_17102,FGRRES_11250,FGRRES_08188_M,FGRRES_01230,FGR…	0.39343
cellular iron ion homeostasis	GO:0006879	11	0.00886266	2.01044	11	21	1921	7373	FGRRES_00654,FGRRES_00646,FGRRES_07832,FGRRES_11029,FGRRES_17670_M,FGRRES_01317,FGRRES_09833,FGRRES_10049,FGRRES_10854,FGRRES_10887,FGRRES_15855_M,	0.409691
iron ion homeostasis	GO:0055072	10	0.00886266	2.01044	11	21	1921	7373	FGRRES_00654,FGRRES_00646,FGRRES_07832,FGRRES_11029,FGRRES_17670_M,FGRRES_01317,FGRRES_09833,FGRRES_10049,FGRRES_10854,FGRRES_10887,FGRRES_15855_M,	0.409691
L-serine metabolic process	GO:0006563	10	0.00997683	1.65736	19	44	1921	7373	FGRRES_06370,FGRRES_08498,FGRRES_03668,FGRRES_02001,FGRRES_08352,FGRRES_08350,FGRRES_06544,FGRRES_01177,FGRRES_09873,FGRRES_00903,FGRRES_17089,FGRRES_00296,FGRRES_13617,FGRRES_05221,FGRRES_10211,FGRRES_17643,FGRRES_10119,FGRRES_10893_M,FGRRES_08529,	0.443457
single-organism biosynthetic process	GO:0044711	4	0.00994077	1.14696	205	686	1921	7373	FGRRES_03603,FGRRES_05749,FGRRES_06375,FGRRES_06370,FGRRES_00688,FGRRES_08498,FGRRES_05733,FGRRES_06215,FGRRES_10722,FGRRES_06282,FGRRES_17341,FGRRES_03668,FGRRES_08623_M,FGRRES_16741,FGRRES_16739,FGRRES_04102,FGRRES_03066_M,FGRRES_01486,FGRRES_01485,FGRRES_08426,FGRRES_05696,FGRRES_20078,FGRRES_16340_M,FGRRES_08458,FGRRES_05843,FGRRES_09339,FGRRES_07946,FGRRES_05826,FGRRES_17247,FGRRES_02001,FGR…	0.447593
serine family amino acid metabolic process	GO:0009069	9	0.0103011	1.32857	54	156	1921	7373	FGRRES_06370,FGRRES_08498,FGRRES_03668,FGRRES_06206,FGRRES_16693,FGRRES_05845,FGRRES_02001,FGRRES_13318_M,FGRRES_06420,FGRRES_16633,FGRRES_16586,FGRRES_01347,FGRRES_01312,FGRRES_05775,FGRRES_08352,FGRRES_08350,FGRRES_08351,FGRRES_13319,FGRRES_01188,FGRRES_06544,FGRRES_01177,FGRRES_07150,FGRRES_09873,FGRRES_16980_M,FGRRES_04382,FGRRES_00132,FGRRES_17001,FGRRES_01059,FGRRES_16828,FGRRES_00903,FGRRE…	0.452074
monocarboxylic acid biosynthetic process	GO:0072330	8	0.0111664	1.43402	34	91	1921	7373	FGRRES_06282,FGRRES_09339,FGRRES_03546,FGRRES_13963,FGRRES_09321,FGRRES_16007,FGRRES_09035,FGRRES_13282,FGRRES_07075_M,FGRRES_09830_M,FGRRES_09503_M,FGRRES_00049,FGRRES_09048_M,FGRRES_01759,FGRRES_09610,FGRRES_02522,FGRRES_02543,FGRRES_02539,FGRRES_02717_M,FGRRES_07347,FGRRES_06813,FGRRES_10272,FGRRES_03978,FGRRES_15680_M,FGRRES_10118,FGRRES_11656,FGRRES_08667,FGRRES_05903,FGRRES_12330,FGRRES_026…	0.483926
cellular amino acid catabolic process	GO:0009063	8	0.0115867	1.43929	33	88	1921	7373	FGRRES_05739,FGRRES_09257,FGRRES_04117,FGRRES_04196,FGRRES_03546,FGRRES_04309,FGRRES_01395,FGRRES_16594,FGRRES_13956,FGRRES_13957,FGRRES_13963,FGRRES_09321,FGRRES_08352,FGRRES_08351,FGRRES_02347,FGRRES_06536,FGRRES_01285,FGRRES_01141,FGRRES_09503_M,FGRRES_00049,FGRRES_00979,FGRRES_01759,FGRRES_06752,FGRRES_00296,FGRRES_04256_M,FGRRES_06813,FGRRES_03933,FGRRES_05623_M,FGRRES_10925,FGRRES_10967,FGR…	0.495939
alpha-amino acid biosynthetic process	GO:1901607	9	0.0118186	1.32011	54	157	1921	7373	FGRRES_08498,FGRRES_05733,FGRRES_10722,FGRRES_06282,FGRRES_17341,FGRRES_01486,FGRRES_08426,FGRRES_05696,FGRRES_08458,FGRRES_17214,FGRRES_01962_M,FGRRES_16594,FGRRES_01346,FGRRES_04287,FGRRES_08338,FGRRES_06544,FGRRES_01177,FGRRES_08761_M,FGRRES_01217,FGRRES_01285,FGRRES_00865,FGRRES_05455,FGRRES_08179,FGRRES_06675,FGRRES_09984,FGRRES_01141,FGRRES_00903,FGRRES_00049,FGRRES_00296,FGRRES_04256_M,FGR…	0.499694
ribosomal large subunit export from nucleus	GO:0000055	7	0.0119699	2.02006	10	19	1921	7373	FGRRES_07952_M,FGRRES_01386,FGRRES_01185,FGRRES_07107,FGRRES_05466,FGRRES_06845,FGRRES_09760,FGRRES_10272,FGRRES_02478,FGRRES_01592,	0.499995
terpenoid metabolic process	GO:0006721	7	0.0119699	2.02006	10	19	1921	7373	FGRRES_06215,FGRRES_03066_M,FGRRES_16340_M,FGRRES_03537,FGRRES_00979,FGRRES_10397,FGRRES_09722,FGRRES_17725,FGRRES_05912,FGRRES_10694_M,	0.499995
transcription of nuclear large rRNA transcript from RNA polymerase I promoter	GO:0042790	9	0.0123275	2.55874	6	9	1921	7373	FGRRES_11782,FGRRES_04291,FGRRES_07086,FGRRES_04470,FGRRES_05550,FGRRES_16512,	0.502817
nucleic acid phosphodiester bond hydrolysis	GO:0090305	7	0.012891	1.28617	63	188	1921	7373	FGRRES_17327,FGRRES_06203,FGRRES_16767,FGRRES_11865,FGRRES_01490,FGRRES_10795,FGRRES_05857,FGRRES_17206,FGRRES_01345,FGRRES_05775,FGRRES_09025,FGRRES_06049,FGRRES_06032,FGRRES_09813,FGRRES_00877,FGRRES_05502,FGRRES_05516,FGRRES_16998,FGRRES_04404,FGRRES_04408,FGRRES_01968,FGRRES_03379,FGRRES_07107,FGRRES_06070,FGRRES_15738_M,FGRRES_07055,FGRRES_01102,FGRRES_05556,FGRRES_09683,FGRRES_07262_M,FGRRE…	0.519688
branched-chain amino acid metabolic process	GO:0009081	8	0.0130936	1.59921	20	48	1921	7373	FGRRES_08498,FGRRES_10722,FGRRES_06282,FGRRES_05696,FGRRES_03546,FGRRES_13963,FGRRES_09321,FGRRES_05455,FGRRES_08179,FGRRES_06675,FGRRES_09503_M,FGRRES_00049,FGRRES_01759,FGRRES_00296,FGRRES_04570,FGRRES_02717_M,FGRRES_06813,FGRRES_10118,FGRRES_12330,FGRRES_09512,	0.521786
potassium ion transport	GO:0006813	8	0.0132877	2.1932	8	14	1921	7373	FGRRES_04178,FGRRES_02820,FGRRES_16803,FGRRES_06948,FGRRES_05070,FGRRES_01606,FGRRES_04095,FGRRES_09583,	0.523506
organic hydroxy compound metabolic process	GO:1901615	4	0.0156451	1.33887	45	129	1921	7373	FGRRES_03603,FGRRES_13110,FGRRES_06215,FGRRES_09261,FGRRES_03392_M,FGRRES_06477,FGRRES_17247,FGRRES_04208,FGRRES_08399_M,FGRRES_05775,FGRRES_09321,FGRRES_06606,FGRRES_12746,FGRRES_01053,FGRRES_09830_M,FGRRES_16878,FGRRES_03309,FGRRES_09197,FGRRES_09503_M,FGRRES_00926,FGRRES_06735_M,FGRRES_00979,FGRRES_00298,FGRRES_01759,FGRRES_02522,FGRRES_02584,FGRRES_07315,FGRRES_16159,FGRRES_00399,FGRRES_10272…	0.542415
spliceosomal tri-snRNP complex assembly	GO:0000244	9	0.0182037	3.07048	4	5	1921	7373	FGRRES_16766,FGRRES_01299,FGRRES_17193,FGRRES_17287_M,	0.544072
regulation of steroid biosynthetic process	GO:0050810	8	0.0182037	3.07048	4	5	1921	7373	FGRRES_02584,FGRRES_10272,FGRRES_02758,FGRRES_07450,	0.544072
regulation of steroid metabolic process	GO:0019218	7	0.0182037	3.07048	4	5	1921	7373	FGRRES_02584,FGRRES_10272,FGRRES_02758,FGRRES_07450,	0.544072
regulation of ergosterol biosynthetic process	GO:0032443	7	0.0182037	3.07048	4	5	1921	7373	FGRRES_02584,FGRRES_10272,FGRRES_02758,FGRRES_07450,	0.544072
purine nucleobase catabolic process	GO:0006145	9	0.0182037	3.07048	4	5	1921	7373	FGRRES_16031,FGRRES_02383,FGRRES_05323,FGRRES_01567,	0.544072
nucleobase catabolic process	GO:0046113	8	0.0182037	3.07048	4	5	1921	7373	FGRRES_16031,FGRRES_02383,FGRRES_05323,FGRRES_01567,	0.544072
phosphatidylethanolamine metabolic process	GO:0046337	8	0.0182037	3.07048	4	5	1921	7373	FGRRES_06370,FGRRES_09261,FGRRES_20078,FGRRES_04571,	0.544072
acylglycerol biosynthetic process	GO:0046463	8	0.0182037	3.07048	4	5	1921	7373	FGRRES_06375,FGRRES_01349,FGRRES_00866,FGRRES_06688,	0.544072
neutral lipid biosynthetic process	GO:0046460	7	0.0182037	3.07048	4	5	1921	7373	FGRRES_06375,FGRRES_01349,FGRRES_00866,FGRRES_06688,	0.544072
lipid metabolic process	GO:0006629	4	0.015921	1.18318	123	399	1921	7373	FGRRES_03603,FGRRES_07890,FGRRES_06375,FGRRES_06240,FGRRES_06370,FGRRES_00688,FGRRES_06215,FGRRES_09261,FGRRES_09281,FGRRES_16739,FGRRES_16733,FGRRES_04103,FGRRES_04102,FGRRES_03066_M,FGRRES_01419,FGRRES_20078,FGRRES_16340_M,FGRRES_05826,FGRRES_02001,FGRRES_17216,FGRRES_03546,FGRRES_03582,FGRRES_03537,FGRRES_03532,FGRRES_16567,FGRRES_04237,FGRRES_01349,FGRRES_13963,FGRRES_09321,FGRRES_16007,FGRRE…	0.546514
ion transport	GO:0006811	5	0.0141426	1.18845	122	394	1921	7373	FGRRES_13127,FGRRES_05749,FGRRES_05723,FGRRES_07832,FGRRES_03693,FGRRES_11029,FGRRES_09297,FGRRES_06685_M,FGRRES_04182,FGRRES_04178,FGRRES_01419,FGRRES_08466,FGRRES_05659,FGRRES_02820,FGRRES_17670_M,FGRRES_00768,FGRRES_05839,FGRRES_04204,FGRRES_01364,FGRRES_15955,FGRRES_01341,FGRRES_04242,FGRRES_15919,FGRRES_15904,FGRRES_08347,FGRRES_09020,FGRRES_00880,FGRRES_06021,FGRRES_17162,FGRRES_08264,FGRRE…	0.550927
terpenoid biosynthetic process	GO:0016114	8	0.0162186	2.03194	9	17	1921	7373	FGRRES_06215,FGRRES_03066_M,FGRRES_16340_M,FGRRES_03537,FGRRES_10397,FGRRES_09722,FGRRES_17725,FGRRES_05912,FGRRES_10694_M,	0.551272
malate transmembrane transport	GO:0071423	12	0.0154437	2.7415	5	7	1921	7373	FGRRES_02281,FGRRES_01785,FGRRES_10288,FGRRES_16461,FGRRES_10454_M,	0.551991
potassium ion homeostasis	GO:0055075	9	0.0154437	2.7415	5	7	1921	7373	FGRRES_01341,FGRRES_00852,FGRRES_16803,FGRRES_04095,FGRRES_05147,	0.551991
malate transport	GO:0015743	11	0.0154437	2.7415	5	7	1921	7373	FGRRES_02281,FGRRES_01785,FGRRES_10288,FGRRES_16461,FGRRES_10454_M,	0.551991
arginine metabolic process	GO:0006525	10	0.017039	1.5853	19	46	1921	7373	FGRRES_08426,FGRRES_01962_M,FGRRES_16921,FGRRES_09035,FGRRES_01217,FGRRES_01141,FGRRES_17089,FGRRES_01759,FGRRES_13617,FGRRES_01032,FGRRES_12518,FGRRES_05249,FGRRES_03917,FGRRES_10967,FGRRES_01573,FGRRES_05903,FGRRES_09554,FGRRES_04998,FGRRES_06098_M,	0.552096
threonine metabolic process	GO:0006566	10	0.0172043	1.63119	17	40	1921	7373	FGRRES_06370,FGRRES_08498,FGRRES_03668,FGRRES_02001,FGRRES_08352,FGRRES_06544,FGRRES_01177,FGRRES_17089,FGRRES_00296,FGRRES_13617,FGRRES_05221,FGRRES_10211,FGRRES_17643,FGRRES_05623_M,FGRRES_10119,FGRRES_10893_M,FGRRES_08529,	0.552289
sterol metabolic process	GO:0016125	6	0.0172043	1.63119	17	40	1921	7373	FGRRES_03603,FGRRES_06215,FGRRES_09321,FGRRES_06606,FGRRES_12746,FGRRES_09830_M,FGRRES_09197,FGRRES_00926,FGRRES_02584,FGRRES_07315,FGRRES_10272,FGRRES_02758,FGRRES_02783,FGRRES_13888,FGRRES_16532,FGRRES_05912,FGRRES_07450,	0.552289
isoprenoid metabolic process	GO:0006720	6	0.0164517	1.73334	14	31	1921	7373	FGRRES_06215,FGRRES_03066_M,FGRRES_16340_M,FGRRES_03537,FGRRES_09197,FGRRES_00979,FGRRES_00298,FGRRES_01759,FGRRES_10397,FGRRES_10272,FGRRES_09722,FGRRES_17725,FGRRES_05912,FGRRES_10694_M,	0.553766
pentose-phosphate shunt, oxidative branch	GO:0009051	10	0.0176664	3.83811	3	3	1921	7373	FGRRES_01279,FGRRES_07031,FGRRES_01111,	0.556812
endoplasmic reticulum tubular network organization	GO:0071786	6	0.0176664	3.83811	3	3	1921	7373	FGRRES_09796,FGRRES_04983,FGRRES_07419,	0.556812
regulation of phosphatidylinositol biosynthetic process	GO:0010511	8	0.0176664	3.83811	3	3	1921	7373	FGRRES_06370,FGRRES_09982,FGRRES_10243,	0.556812
N-acetylglucosamine metabolic process	GO:0006044	7	0.0176664	3.83811	3	3	1921	7373	FGRRES_08398,FGRRES_07692,FGRRES_17044,	0.556812
phosphatidylserine metabolic process	GO:0006658	5	0.0176664	3.83811	3	3	1921	7373	FGRRES_06370,FGRRES_04237,FGRRES_00399,	0.556812
glycerol transport	GO:0015793	7	0.0176664	3.83811	3	3	1921	7373	FGRRES_05839,FGRRES_03248,FGRRES_07587,	0.556812
steroid metabolic process	GO:0008202	5	0.0203203	1.50783	22	56	1921	7373	FGRRES_03603,FGRRES_06215,FGRRES_03066_M,FGRRES_09321,FGRRES_06606,FGRRES_12746,FGRRES_09830_M,FGRRES_09197,FGRRES_09503_M,FGRRES_00926,FGRRES_01759,FGRRES_02584,FGRRES_07315,FGRRES_10272,FGRRES_09722,FGRRES_17725,FGRRES_02758,FGRRES_02783,FGRRES_13888,FGRRES_16532,FGRRES_05912,FGRRES_07450,	0.559132
ribosomal subunit export from nucleus	GO:0000054	6	0.0168764	1.69328	15	34	1921	7373	FGRRES_02025,FGRRES_06165,FGRRES_07952_M,FGRRES_01386,FGRRES_01185,FGRRES_07101,FGRRES_07107,FGRRES_05466,FGRRES_06845,FGRRES_09760,FGRRES_10272,FGRRES_02478,FGRRES_01592,FGRRES_02785,FGRRES_16531,	0.562602
glutamine family amino acid biosynthetic process	GO:0009084	10	0.0168764	1.69328	15	34	1921	7373	FGRRES_05733,FGRRES_17341,FGRRES_08426,FGRRES_08458,FGRRES_01962_M,FGRRES_01217,FGRRES_01141,FGRRES_01032,FGRRES_10264,FGRRES_03917,FGRRES_11697,FGRRES_01573,FGRRES_09554,FGRRES_09580,FGRRES_06098_M,	0.562602
ribosome localization	GO:0033750	5	0.0168764	1.69328	15	34	1921	7373	FGRRES_02025,FGRRES_06165,FGRRES_07952_M,FGRRES_01386,FGRRES_01185,FGRRES_07101,FGRRES_07107,FGRRES_05466,FGRRES_06845,FGRRES_09760,FGRRES_10272,FGRRES_02478,FGRRES_01592,FGRRES_02785,FGRRES_16531,	0.562602
cellular cation homeostasis	GO:0030003	8	0.0202933	1.43289	28	75	1921	7373	FGRRES_00654,FGRRES_00646,FGRRES_07832,FGRRES_11029,FGRRES_06685_M,FGRRES_01438,FGRRES_04178,FGRRES_17670_M,FGRRES_01364,FGRRES_01341,FGRRES_01317,FGRRES_09833,FGRRES_01230,FGRRES_00852,FGRRES_16803,FGRRES_09681,FGRRES_00371,FGRRES_02400,FGRRES_06922,FGRRES_08873_M,FGRRES_05974,FGRRES_16768_M,FGRRES_10049,FGRRES_10854,FGRRES_10887,FGRRES_15855_M,FGRRES_04095,FGRRES_07418,	0.562855
cellular chemical homeostasis	GO:0055082	6	0.0146676	1.39567	36	99	1921	7373	FGRRES_00654,FGRRES_00646,FGRRES_07832,FGRRES_11029,FGRRES_06685_M,FGRRES_01438,FGRRES_04178,FGRRES_17670_M,FGRRES_01364,FGRRES_08399_M,FGRRES_01341,FGRRES_01317,FGRRES_09833,FGRRES_01230,FGRRES_00852,FGRRES_16803,FGRRES_16878,FGRRES_06633,FGRRES_09681,FGRRES_00371,FGRRES_02400,FGRRES_03014,FGRRES_06922,FGRRES_08873_M,FGRRES_10152,FGRRES_06977,FGRRES_05974,FGRRES_16768_M,FGRRES_10049,FGRRES_10854…	0.56503
ergosterol metabolic process	GO:0008204	7	0.0148729	1.84229	12	25	1921	7373	FGRRES_06215,FGRRES_09321,FGRRES_09830_M,FGRRES_09197,FGRRES_00926,FGRRES_02584,FGRRES_07315,FGRRES_10272,FGRRES_02758,FGRRES_02783,FGRRES_05912,FGRRES_07450,	0.566643
cellular alcohol biosynthetic process	GO:0044108	7	0.0148729	1.84229	12	25	1921	7373	FGRRES_06215,FGRRES_09321,FGRRES_09830_M,FGRRES_09197,FGRRES_00926,FGRRES_02584,FGRRES_07315,FGRRES_10272,FGRRES_02758,FGRRES_02783,FGRRES_05912,FGRRES_07450,	0.566643
cellular lipid biosynthetic process	GO:0097384	6	0.0148729	1.84229	12	25	1921	7373	FGRRES_06215,FGRRES_09321,FGRRES_09830_M,FGRRES_09197,FGRRES_00926,FGRRES_02584,FGRRES_07315,FGRRES_10272,FGRRES_02758,FGRRES_02783,FGRRES_05912,FGRRES_07450,	0.566643
ergosterol biosynthetic process	GO:0006696	8	0.0148729	1.84229	12	25	1921	7373	FGRRES_06215,FGRRES_09321,FGRRES_09830_M,FGRRES_09197,FGRRES_00926,FGRRES_02584,FGRRES_07315,FGRRES_10272,FGRRES_02758,FGRRES_02783,FGRRES_05912,FGRRES_07450,	0.566643
phytosteroid biosynthetic process	GO:0016129	7	0.0148729	1.84229	12	25	1921	7373	FGRRES_06215,FGRRES_09321,FGRRES_09830_M,FGRRES_09197,FGRRES_00926,FGRRES_02584,FGRRES_07315,FGRRES_10272,FGRRES_02758,FGRRES_02783,FGRRES_05912,FGRRES_07450,	0.566643
phytosteroid metabolic process	GO:0016128	6	0.0148729	1.84229	12	25	1921	7373	FGRRES_06215,FGRRES_09321,FGRRES_09830_M,FGRRES_09197,FGRRES_00926,FGRRES_02584,FGRRES_07315,FGRRES_10272,FGRRES_02758,FGRRES_02783,FGRRES_05912,FGRRES_07450,	0.566643
isoprenoid biosynthetic process	GO:0008299	7	0.0212029	1.77143	12	26	1921	7373	FGRRES_06215,FGRRES_03066_M,FGRRES_16340_M,FGRRES_03537,FGRRES_09197,FGRRES_00298,FGRRES_10397,FGRRES_10272,FGRRES_09722,FGRRES_17725,FGRRES_05912,FGRRES_10694_M,	0.578823
isoleucine metabolic process	GO:0006549	9	0.0221512	1.57013	18	44	1921	7373	FGRRES_08498,FGRRES_10722,FGRRES_06282,FGRRES_05696,FGRRES_03546,FGRRES_13963,FGRRES_09321,FGRRES_05455,FGRRES_08179,FGRRES_06675,FGRRES_09503_M,FGRRES_00049,FGRRES_01759,FGRRES_00296,FGRRES_02717_M,FGRRES_06813,FGRRES_10118,FGRRES_12330,	0.595334
cellular aldehyde metabolic process	GO:0006081	4	0.0227024	1.45383	25	66	1921	7373	FGRRES_05739,FGRRES_06127_M,FGRRES_05843,FGRRES_17247,FGRRES_13956,FGRRES_13957,FGRRES_16919,FGRRES_09896,FGRRES_01279,FGRRES_01053,FGRRES_06675,FGRRES_07031,FGRRES_01111,FGRRES_06852,FGRRES_10267,FGRRES_03933,FGRRES_08700,FGRRES_00417,FGRRES_08689,FGRRES_05035,FGRRES_05036,FGRRES_17406,FGRRES_10840,FGRRES_00589,FGRRES_11500,	0.596282
inorganic anion transmembrane transport	GO:0098661	8	0.0220612	2.04699	8	15	1921	7373	FGRRES_04242,FGRRES_11292,FGRRES_01230,FGRRES_01066,FGRRES_06815_M,FGRRES_01006,FGRRES_01591,FGRRES_05147,	0.597547
ribonucleoprotein complex subunit organization	GO:0071826	5	0.022611	1.3078	46	135	1921	7373	FGRRES_10757,FGRRES_06243,FGRRES_06260,FGRRES_16766,FGRRES_05698,FGRRES_06165,FGRRES_05737_M,FGRRES_01299,FGRRES_01332,FGRRES_01343,FGRRES_04286,FGRRES_01314,FGRRES_01300,FGRRES_09807,FGRRES_07101,FGRRES_01210,FGRRES_04326,FGRRES_04320,FGRRES_17193,FGRRES_05466,FGRRES_07051,FGRRES_06628,FGRRES_06705,FGRRES_05585,FGRRES_00961,FGRRES_06743,FGRRES_17287_M,FGRRES_05244,FGRRES_01175_M,FGRRES_09740,FGR…	0.598415
lysine metabolic process	GO:0006553	10	0.0225815	1.6449	15	35	1921	7373	FGRRES_08498,FGRRES_03546,FGRRES_04309,FGRRES_16594,FGRRES_13963,FGRRES_09321,FGRRES_06536,FGRRES_08761_M,FGRRES_01285,FGRRES_00979,FGRRES_01759,FGRRES_04256_M,FGRRES_06813,FGRRES_10925,FGRRES_12330,	0.602232
cellular homeostasis	GO:0019725	5	0.023391	1.29739	48	142	1921	7373	FGRRES_00654,FGRRES_00646,FGRRES_07180_M,FGRRES_07832,FGRRES_11029,FGRRES_06685_M,FGRRES_01438,FGRRES_04178,FGRRES_02097,FGRRES_17670_M,FGRRES_06150,FGRRES_01364,FGRRES_08399_M,FGRRES_01341,FGRRES_01317,FGRRES_09833,FGRRES_07182,FGRRES_01230,FGRRES_00852,FGRRES_05450,FGRRES_11914,FGRRES_16803,FGRRES_16878,FGRRES_06633,FGRRES_09681,FGRRES_00371,FGRRES_02400,FGRRES_03946,FGRRES_02433,FGRRES_03014,F…	0.609749
rRNA modification	GO:0000154	10	0.0250684	1.91905	9	18	1921	7373	FGRRES_06243,FGRRES_06161,FGRRES_10304,FGRRES_01870,FGRRES_07206,FGRRES_10175,FGRRES_16531,FGRRES_09036_M,FGRRES_07452,	0.643794
ribonucleoprotein complex assembly	GO:0022618	7	0.0249024	1.30912	44	129	1921	7373	FGRRES_06243,FGRRES_06260,FGRRES_16766,FGRRES_05698,FGRRES_06165,FGRRES_05737_M,FGRRES_01299,FGRRES_01332,FGRRES_01343,FGRRES_04286,FGRRES_01314,FGRRES_01300,FGRRES_09807,FGRRES_01210,FGRRES_04326,FGRRES_04320,FGRRES_17193,FGRRES_05466,FGRRES_07051,FGRRES_06628,FGRRES_06705,FGRRES_05585,FGRRES_00961,FGRRES_06743,FGRRES_17287_M,FGRRES_05244,FGRRES_01175_M,FGRRES_09740,FGRRES_10246,FGRRES_16145,FGR…	0.644304
inorganic ion homeostasis	GO:0098771	7	0.026581	1.38727	30	83	1921	7373	FGRRES_00654,FGRRES_00646,FGRRES_07832,FGRRES_11029,FGRRES_06685_M,FGRRES_01438,FGRRES_17670_M,FGRRES_01364,FGRRES_01341,FGRRES_01317,FGRRES_09833,FGRRES_01230,FGRRES_00852,FGRRES_16803,FGRRES_09681,FGRRES_00371,FGRRES_02400,FGRRES_06922,FGRRES_08873_M,FGRRES_06977,FGRRES_05974,FGRRES_16768_M,FGRRES_01606,FGRRES_10049,FGRRES_10854,FGRRES_10887,FGRRES_15855_M,FGRRES_04095,FGRRES_07418,FGRRES_05147,	0.677621
regulation of lipid biosynthetic process	GO:0046890	6	0.0271475	1.82767	10	21	1921	7373	FGRRES_06370,FGRRES_16007,FGRRES_09982,FGRRES_02584,FGRRES_00399,FGRRES_10243,FGRRES_10272,FGRRES_02758,FGRRES_10152,FGRRES_07450,	0.68701
fatty acid biosynthetic process	GO:0006633	9	0.02816	1.53524	18	45	1921	7373	FGRRES_03546,FGRRES_13963,FGRRES_09321,FGRRES_16007,FGRRES_07075_M,FGRRES_09830_M,FGRRES_09503_M,FGRRES_02522,FGRRES_07347,FGRRES_06813,FGRRES_10272,FGRRES_03978,FGRRES_15680_M,FGRRES_11656,FGRRES_12330,FGRRES_10853,FGRRES_08521,FGRRES_05164,	0.707469
isoleucine biosynthetic process	GO:0009097	10	0.0285102	1.75913	11	24	1921	7373	FGRRES_08498,FGRRES_10722,FGRRES_06282,FGRRES_05696,FGRRES_05455,FGRRES_08179,FGRRES_06675,FGRRES_00049,FGRRES_00296,FGRRES_02717_M,FGRRES_10118,	0.711113
cellular alcohol metabolic process	GO:0044107	6	0.029324	1.70582	12	27	1921	7373	FGRRES_06215,FGRRES_09321,FGRRES_09830_M,FGRRES_09197,FGRRES_00926,FGRRES_02584,FGRRES_07315,FGRRES_10272,FGRRES_02758,FGRRES_02783,FGRRES_05912,FGRRES_07450,	0.726187
[truncated: 3,328 more rows]

## Sheet: ΔFgGCN5 Cellular Component
Table S4 Go enrichment of DEGs of ΔFgSAS3 and ΔFgSAS3 mutants
[truncated: 633 more rows]

[truncated: 1 more sheets: ΔFgGCN5 Molecular Function]
